# Supplementary material
Source: HighWire-hosted journal article supplement (https://gut.bmj.com/content/70/1/114)
Supplement: inline-supplementary-material-1 [file inline-supplementary-material-1.pdf]

## Colorectal cancer survival in seven high-income countries 2010-2014: uncovering the impact of age and stage at diagnosis (the ICBP Survmark-2 project)

### Supplementary materials

List of local leads, academic reference group, clinical leads and Upper GI Clinical Committee

|                                                                                                                                                                                                                 |    |
|-----------------------------------------------------------------------------------------------------------------------------------------------------------------------------------------------------------------|----|
| Supplementary Figure 1A. Flow chart of conversion of stage at diagnosis data to produce mapped SEER stage variable .                                                                                            | 9  |
| Supplementary Figure 1B. Algorithm for mapping TNM stage to SEER stage .....                                                                                                                                    | 10 |
| Supplementary Figure 2A. Proportions of cases diagnosed with colon cancer during 2010-2014 by age, mapped SEER stage and country after imputation of stage at diagnosis .....                                   | 11 |
| Supplementary Figure 2B. Proportions of cases diagnosed with colon cancer during 2010-2014 by age, TNM stage and country after imputation of stage at diagnosis .....                                           | 12 |
| Supplementary Figure 3A. Proportions of cases diagnosed with rectal cancer during 2010-2014 by age, mapped SEER stage and country after imputation of stage at diagnosis .....                                  | 13 |
| Supplementary Figure 3B. Proportions of cases diagnosed with rectal cancer during 2010-2014 by age, TNM stage and country after imputation of stage at diagnosis .....                                          | 14 |
| Supplementary Figure 4A. Comparison of estimated 1-year and 5-year net survival for colon cancer between original data with unknown or missing stage and imputed stage (SEER) for 2010-2014 study period .....  | 15 |
| Supplementary Figure 4B. Comparison of estimated 1-year and 5-year net survival for colon cancer between original data with unknown or missing stage and imputed stage (TNM) for 2010-2014 study period .....   | 16 |
| Supplementary Figure 5A. Comparison of estimated 1-year and 5-year net survival for rectal cancer between original data with unknown or missing stage and imputed stage (SEER) for 2010-2014 study period ..... | 17 |
| Supplementary Figure 5B. Comparison of estimated 1-year and 5-year net survival for rectal cancer between original data with unknown or missing stage and imputed stage (TNM) for 2010-2014 study period .....  | 18 |
| Supplementary Table 1A. Proportions with missing or unknown stage for colon cancer in 2010-2014 <sup>a</sup> .....                                                                                              | 19 |
| Supplementary Table 1B. Proportions with missing or unknown stage for rectal cancer in 2010-2014 <sup>a</sup> .....                                                                                             | 20 |
| Supplementary Table 2A. Age-standardised and age-specific one-year net survival (%) by (imputed) stage at diagnosis and country for colon cancer patients diagnosed during 2010-2014 .....                      | 21 |
| Supplementary Table 2B. Age-standardised and age-specific five-year net survival (%) by (imputed) stage at diagnosis and country for colon cancer patients diagnosed during 2010-2014 .....                     | 22 |
| Supplementary Table 3A. Age-standardised and age-specific one-year net survival (%) by (imputed) stage at diagnosis and country for rectal cancer patients diagnosed during 2010-2014 .....                     | 23 |
| Supplementary Table 3B. Age-standardised and age-specific five-year net survival (%) by (imputed) stage at diagnosis and country for rectal cancer patients diagnosed during 2010-2014 .....                    | 24 |
| Supplementary Table 4A. Age-standardised and age-specific one-year net survival (%) by (imputed) stage at diagnosis and country for male colon cancer patients diagnosed during 2010-2014 .....                 | 25 |

|                                                                                                                                                                                                                                                                    |    |
|--------------------------------------------------------------------------------------------------------------------------------------------------------------------------------------------------------------------------------------------------------------------|----|
| Supplementary Table 4B. Age-standardised and age-specific five-year net survival (%) by (imputed) stage at diagnosis and country for male colon cancer patients diagnosed during 2010-2014 .....                                                                   | 26 |
| Supplementary Table 5A. Age-standardised and age-specific one-year net survival (%) by (imputed) stage at diagnosis and country for female colon cancer patients diagnosed during 2010-2014 .....                                                                  | 27 |
| Supplementary Table 5B. Age-standardised and age-specific five-year net survival (%) by (imputed) stage at diagnosis and country for female colon cancer patients diagnosed during 2010-2014 .....                                                                 | 28 |
| Supplementary Table 6A. Age-standardised and age-specific one-year net survival (%) by (imputed) stage at diagnosis and country for male rectal cancer patients diagnosed during 2010-2014 .....                                                                   | 29 |
| Supplementary Table 6B. Age-standardised and age-specific five-year net survival (%) by (imputed) stage at diagnosis and country for male rectal cancer patients diagnosed during 2010-2014 .....                                                                  | 30 |
| Supplementary Table 7A. Age-standardised and age-specific one-year net survival (%) by (imputed) stage at diagnosis and country for female rectal cancer patients diagnosed during 2010-2014 .....                                                                 | 31 |
| Supplementary Table 7B. Age-standardised and age-specific five-year net survival (%) by (imputed) stage at diagnosis and country for female rectal cancer patients diagnosed during 2010-2014 .....                                                                | 32 |
| Supplementary Table 8A. Age-standardised and age-specific one-year net survival (%) by stage at diagnosis (without imputation, presenting results of those with missing stage information) and country for colon cancer patients diagnosed during 2010-2014.....   | 33 |
| Supplementary Table 8B. Age-standardised and age-specific five-year net survival (%) by stage at diagnosis (without imputation, presenting results of those with missing stage information) and country for colon cancer patients diagnosed during 2010-2014.....  | 34 |
| Supplementary Table 9A. Age-standardised and age-specific one-year net survival (%) by stage at diagnosis (without imputation, presenting results of those with missing stage information) and country for rectal cancer patients diagnosed during 2010-2014.....  | 35 |
| Supplementary Table 9B. Age-standardised and age-specific five-year net survival (%) by stage at diagnosis (without imputation, presenting results of those with missing stage information) and country for rectal cancer patients diagnosed during 2010-2014..... | 36 |
| Supplementary Table 10. Median age, number of cases and proportions (%) of colon and rectal cancers by imputed stage for individual registries in United Kingdom, 2010-2014 .....                                                                                  | 37 |
| Supplementary Table 11A. Age-standardised and age-specific one-year net survival (%) by imputed stage at diagnosis for individual registries in United Kingdom for colon cancer patients diagnosed during 2010-2014 .....                                          | 38 |
| Supplementary Table 11B. Age-standardised and age-specific five-year net survival (%) by imputed stage at diagnosis for individual registries in United Kingdom for colon cancer patients diagnosed during 2010-2014 .....                                         | 39 |
| Supplementary Table 12A. Age-standardised and age-specific one-year net survival (%) by imputed stage at diagnosis for individual registries in United Kingdom for rectal cancer patients diagnosed during 2010-2014 .....                                         | 40 |
| Supplementary Table 12B. Age-standardised and age-specific five-year net survival (%) by imputed stage at diagnosis for individual registries in United Kingdom for rectal cancer patients diagnosed during 2010-2014 .....                                        | 41 |
| Supplementary Table 13A. Age-standardised and age-specific one-year net survival (%) by stage at diagnosis (without imputation) for individual registries in United Kingdom for colon cancer patients diagnosed during 2010-2014.....                              | 42 |
| Supplementary Table 13B. Age-standardised and age-specific five-year net survival (%) by stage at diagnosis (without imputation) for individual registries in United Kingdom for colon cancer patients diagnosed during 2010-2014.....                             | 43 |

|                                                                                                                                                                                                                                         |    |
|-----------------------------------------------------------------------------------------------------------------------------------------------------------------------------------------------------------------------------------------|----|
| Supplementary Table 14A. Age-standardised and age-specific one-year net survival (%) by stage at diagnosis (without imputation) for individual registries in United Kingdom for rectal cancer patients diagnosed during 2010-2014.....  | 44 |
| Supplementary Table 14B. Age-standardised and age-specific five-year net survival (%) by stage at diagnosis (without imputation) for individual registries in United Kingdom for rectal cancer patients diagnosed during 2010-2014..... | 45 |
| Supplementary Table 15. Median age, number of cases and proportions (%) of colon and rectal cancers by imputed stage for individual registries in Canada, 2010-2014 .....                                                               | 46 |
| Supplementary Table 16A. Age-standardised and age-specific one-year net survival (%) by imputed stage at diagnosis for individual registries in Canada for colon cancer patients diagnosed during 2010-2014 .....                       | 47 |
| Supplementary Table 16B. Age-standardised and age-specific five-year net survival (%) by imputed stage at diagnosis for individual registries in Canada for colon cancer patients diagnosed during 2010-2014 .....                      | 48 |
| Supplementary Table 17A. Age-standardised and age-specific one-year net survival (%) by imputed stage at diagnosis for individual registries in Canada for rectal cancer patients diagnosed during 2010-2014 .....                      | 49 |
| Supplementary Table 17B. Age-standardised and age-specific five-year net survival (%) by imputed stage at diagnosis for individual registries in Canada for rectal cancer patients diagnosed during 2010-2014 .....                     | 50 |
| Supplementary Table 18A. Age-standardised and age-specific one-year net survival (%) by stage at diagnosis (without imputation) for individual registries in Canada for colon cancer patients diagnosed during 2010-2014.....           | 51 |
| Supplementary Table 18B. Age-standardised and age-specific five-year net survival (%) by stage at diagnosis (without imputation) for individual registries in Canada for colon cancer patients diagnosed during 2010-2014.....          | 52 |
| Supplementary Table 19A. Age-standardised and age-specific one-year net survival (%) by stage at diagnosis (without imputation) for individual registries in Canada for rectal cancer patients diagnosed during 2010-2014.....          | 53 |
| Supplementary Table 19B. Age-standardised and age-specific five-year net survival (%) by stage at diagnosis (without imputation) for individual registries in Canada for rectal cancer patients diagnosed during 2010-2014.....         | 54 |
| Supplementary Table 20. Median age, number of cases and imputed proportion (%) of colon and rectal cancers by stage for individual registries in Australia, 2010-2014.....                                                              | 55 |
| Supplementary Table 21A. Age-standardised and age-specific one-year net survival (%) by imputed stage at diagnosis for individual registries in Australia for colon cancer patients diagnosed during 2010-2014.....                     | 56 |
| Supplementary Table 21B. Age-standardised and age-specific five-year net survival (%) by imputed stage at diagnosis for individual registries in Australia for colon cancer patients diagnosed during 2010-2014.....                    | 57 |
| Supplementary Table 22A. Age-standardised and age-specific one-year net survival (%) by imputed stage at diagnosis for individual registries in Australia for rectal cancer patients diagnosed during 2010-2014.....                    | 58 |
| Supplementary Table 22B. Age-standardised and age-specific five-year net survival (%) by imputed stage at diagnosis for individual registries in Australia for rectal cancer patients diagnosed during 2010-2014.....                   | 59 |
| Supplementary Table 23A. Age-standardised and age-specific one-year net survival (%) by stage at diagnosis (without imputation) for individual registries in Australia for colon cancer patients diagnosed during 2010-2014.....        | 60 |
| Supplementary Table 23B. Age-standardised and age-specific five-year net survival (%) by stage at diagnosis (without imputation) for individual registries in Australia for colon cancer patients diagnosed during 2010-2014.....       | 61 |
| Supplementary Table 24A. Age-standardised and age-specific one-year net survival (%) by stage at diagnosis (without imputation) for individual registries in Australia for rectal cancer patients diagnosed during 2010-2014.....       | 62 |

Supplementary Table 24B. Age-standardised and age-specific five-year net survival (%) by stage at diagnosis (without imputation) for individual registries in Australia for rectal cancer patients diagnosed during 2010-2014 ..... 63

## List of Local Leads, Academic Reference Group, ICBP Clinical Leads, ICBP Upper Clinical Committee and ICBP Programme Board

### *ICBP SurvMark-2 Local Leads:*

Al Artaman, CancerCare Manitoba, Winnipeg, Manitoba, Canada;

Alana Little, Cancer Institute NSW, Alexandria, New South Wales, Australia;

Andy Deas, Information Services Division, NHS National Services, Edinburgh, Scotland, United Kingdom;

Angela Eckstrand, Alberta Health Services, Edmonton, Alberta, Canada;

Anna Gavin, Northern Ireland Cancer Registry, Queen's University Belfast, Belfast, Northern Ireland, United Kingdom;

Bin Zhang, Government of New Brunswick, Fredericton, New Brunswick, Canada;

Bjørn Møller, Cancer Registry of Norway (Kreftregisteret), Oslo, Norway;

Carol McClure, Government of Prince Edward Island, Charlottetown, Prince Edward Island, Canada;

Ceri White, Welsh Cancer Intelligence & Surveillance Unit, Public Health Wales, Cardiff, Wales, United Kingdom;

Christine Bertrand, Government of Quebec, Montreal, Quebec, Canada;

Christopher Jackson, Cancer Society of New Zealand, Wellington, New Zealand;

Cindy Stock, BC Cancer, Vancouver, British Columbia, Canada

Claire Austin, Ministry of Health, New Zealand

David Gavin, The BC Cancer Research Centre, Vancouver, British Columbia, Canada;

David H Brewster, Centre for Population Health Sciences, Edinburgh University, Edinburgh, Scotland, United Kingdom;

David S Morrison, Scottish Cancer Registry, University of Glasgow, Scotland;

Lisa Miller, Department of Health, Perth, Western Australia, Australia;

Deirdre Fitzpatrick, Northern Ireland Cancer Registry, Queen's University Belfast, Belfast, Northern Ireland, United Kingdom;

Donna Turner, CancerCare Manitoba, Winnipeg, Manitoba, Canada;

Dyfed Huws, Welsh Cancer Intelligence & Surveillance Unit, Public Health Wales, Cardiff, Wales, United Kingdom;

Eshwar Kumar, Government of New Brunswick, Fredericton, New Brunswick, Canada;

Farah McCrate, Eastern Health, St. John's, Newfoundland and Labrador, Canada;

Gail Noonan, CancerCare Manitoba, Winnipeg, Manitoba, Canada;

Geoff Porter, Canadian Partnership Against Cancer, Toronto, Ontario, Canada;

Gerda Engholm, The Danish Cancer Society (Kræftens Bekæmpelse), Copenhagen, Denmark;

Gina Lockwood, Canadian Partnership Against Cancer, Toronto, Ontario, Canada;

Grace Musto, CancerCare Manitoba, Winnipeg, Manitoba, Canada;

Grlica Bolesnikov, Government of New Brunswick, Fredericton, New Brunswick, Canada;

Guillaume Ruel, Government of Quebec, Montreal, Quebec, Canada;

Hanna Tervonen, Cancer Institute NSW, Alexandria, New South Wales, Australia;

Hazem Abd Elkader, Cancer Society of New Zealand, Wellington, New Zealand;

Heather Stuart-Panko, Saskatchewan Cancer Agency, Regina, Saskatchewan, Canada;

Helen Farrugia, Cancer Council Victoria, Melbourne, Victoria, Australia;

Janet Warlow, Welsh Cancer Intelligence & Surveillance Unit, Public Health Wales, Cardiff, Wales, United Kingdom;

Jason Poole, Public Health England, London, England, United Kingdom;

Jes Sogaard, The Danish Cancer Society (Kræftens Bekæmpelse), Copenhagen, Denmark;

Jingyu Bu, Alberta Health Services, Edmonton, Alberta, Canada;

John Dowling, Department of Health, Perth, Western Australia, Australia;

John Spinelli, The BC Cancer Research Centre, Vancouver, British Columbia, Canada;

Kim Vriends, Government of Prince Edward Island, Charlottetown, Prince Edward Island, Canada;

Lorraine Shack, Alberta Health Services, Edmonton, Alberta, Canada;

Louise Sandford, Cancer Society of New Zealand, Wellington, New Zealand;

Marianne Brenn Jerm (Cancer Registry of Norway (Kreftregisteret), Oslo, Norway

Mary Jane King, Cancer Care Ontario, Toronto, Ontario, Canada;

Maureen MacIntyre, Nova Scotia Health Authority, Halifax, Nova Scotia, Canada;

Nathalie St-Jacques, Nova Scotia Health Authority Cancer Care Program, Halifax, Nova Scotia, Canada;

Nicole Mittmann, Cancer Care Ontario, Toronto, Ontario, Canada;

Paul Walsh, National Cancer Registry Ireland, Cork, Ireland;

Prithwish De, Cancer Care Ontario, Toronto, Ontario, Canada;

Raman Agnihotram, McGill University Health Centre, Montreal, Quebec, Canada;

Richard Walton, Cancer Institute NSW, Alexandria, New South Wales, Australia;

Richard Trevithick, Department of Health, Perth, Western Australia, Australia;

Rory Carle, Department of Health, Perth, Western Australia, Australia;

Ryan Woods, BC Cancer, 675 W 10th Ave, Vancouver, BC V5Z 1L3, Canada;

Sally Vernon, Public Health England, London, England, United Kingdom;

Serena Kozie, Saskatchewan Cancer Agency, Regina, Saskatchewan, Canada;

Susan Ryan, Eastern Health, St. John's, Newfoundland and Labrador, Canada;

Suzanne Leonfellner, Government of New Brunswick, Fredericton, New Brunswick, Canada;

Vicky Thursfield, Cancer Council Victoria, Melbourne, Victoria, Australia;

*ICBP SurvMark-2 Academic Reference Group:*

Brian Rous, Public Health England, London, United Kingdom;

Diana Sarfati, University of Otago, Dunedin, New Zealand;

Dianne O'Connell, Cancer Council NSW, Sydney, New South Wales, Australia;

Michael Eden, Public Health England, London, United Kingdom;

Sabine Siesling, Netherlands Comprehensive Cancer Organisation (IKNL), Utrecht, The Netherlands and University of Twente, Enschede, The Netherlands.

*ICBP Clinical Leads:*

Allan Spigelman, UNSW, St Vincent's Hospital Clinical School, Sydney, Australia;

Christian Finley, McMaster University, Toronto, Ontario, Canada;

John Butler, The Royal Marsden NHS Foundation Trust, London, United Kingdom;

Naureen Starling, The Royal Marsden NHS Foundation Trust, London, United Kingdom;

Piers Gatenby, Royal Surrey County Hospital Foundation Trust, Guildford, United Kingdom;

*ICBP Clinical Committee – Lower GI:*

Allan Spigelman, UNSW, St Vincent's Hospital Clinical School, Sydney, Australia;

Annika Sjoval, Karolinska University Hospital, Sweden;

Christopher Booth, Queen's University, Kingston, Canada

Cindy Chew, Hairmyres University Hospital and University of Glasgow, Scotland, United Kingdom;

Geoff Porter, Dalhousie University, Nova Scotia, Canada;

Jason Park, St Boniface General Hospital and CancerCare Manitoba, Manitoba, Canada;

John Butler, The Royal Marsden, London, United Kingdom;

Marcia Hall, Mount Vernon Cancer Centre, Rickmansworth, United Kingdom;

Marianne Gronlie Guren, Oslo University Hospital, Norway;

Mark Robinson, Aneurin Bevan University Health Board, Wales, United Kingdom;

Mary Theophilus, Royal Perth Hospital, SJG Midland Public and Private Hospitals, Australia;

Nancy Baxter, St Michael's Hospital and University of Toronto, Canada;

Paulose George, Wrexham Maelor Hospital, Wales, United Kingdom;

Rachel Hargest, University Hospital of Wales, Wales, United Kingdom;

Richard Adams, Cardiff University and Velindre Cancer Centre, Wales, United Kingdom;

Robert Bleehen, Cardiff & Vale University Health Board, Wales, United Kingdom;

Winson Cheung, British Columbia Cancer Agency and University of British Columbia, Canada;

*ICBP Programme Board:*

Aileen Keel, Scottish Government, Edinburgh, Scotland, UK;

Anna Gavin, Queen's University Belfast, Belfast, Northern Ireland, United Kingdom;

David Fitzgerald, National Cancer Programme Director, NHS England, England, United Kingdom;

Christopher Jackson, Cancer Society of New Zealand, Wellington, New Zealand;

Conan Donnelly, National Cancer Registry Ireland, Cork, Ireland;

David Currow, Cancer Institute NSW, Alexandria, New South Wales, Australia;

David Ransom, Department of Health, Western Australia, Perth, Western Australia, Australia;

Gareth Davies, Wales Cancer Network, Cardiff, Wales, United Kingdom;

Geoff Porter, Canadian Partnership Against Cancer, Toronto, Ontario, Canada;

Heather Bryant, Canadian Partnership Against Cancer, Toronto, Ontario, Canada;

Linda Aagaard Thomsen, Danish Cancer Society, Copenhagen, Denmark;

Kathryn Whitfield, Department of Human Services, Melbourne, Victoria, Australia;

Mike Kernaghan, Cancer Society of New Zealand, Wellington, New Zealand;

Nicole Mittmann, Cancer Care Ontario, Toronto, Ontario, Canada;

Ole Alexander Opdalshei, Norwegian Cancer Society, Oslo, Norway;

Robert Thomas, University of Melbourne, Melbourne, Victoria, Australia;

Sara Hiom, Cancer Research UK, England, United Kingdom;

Violet Platt, Department of Health, Western Australia, Perth, Western Australia, Australia;



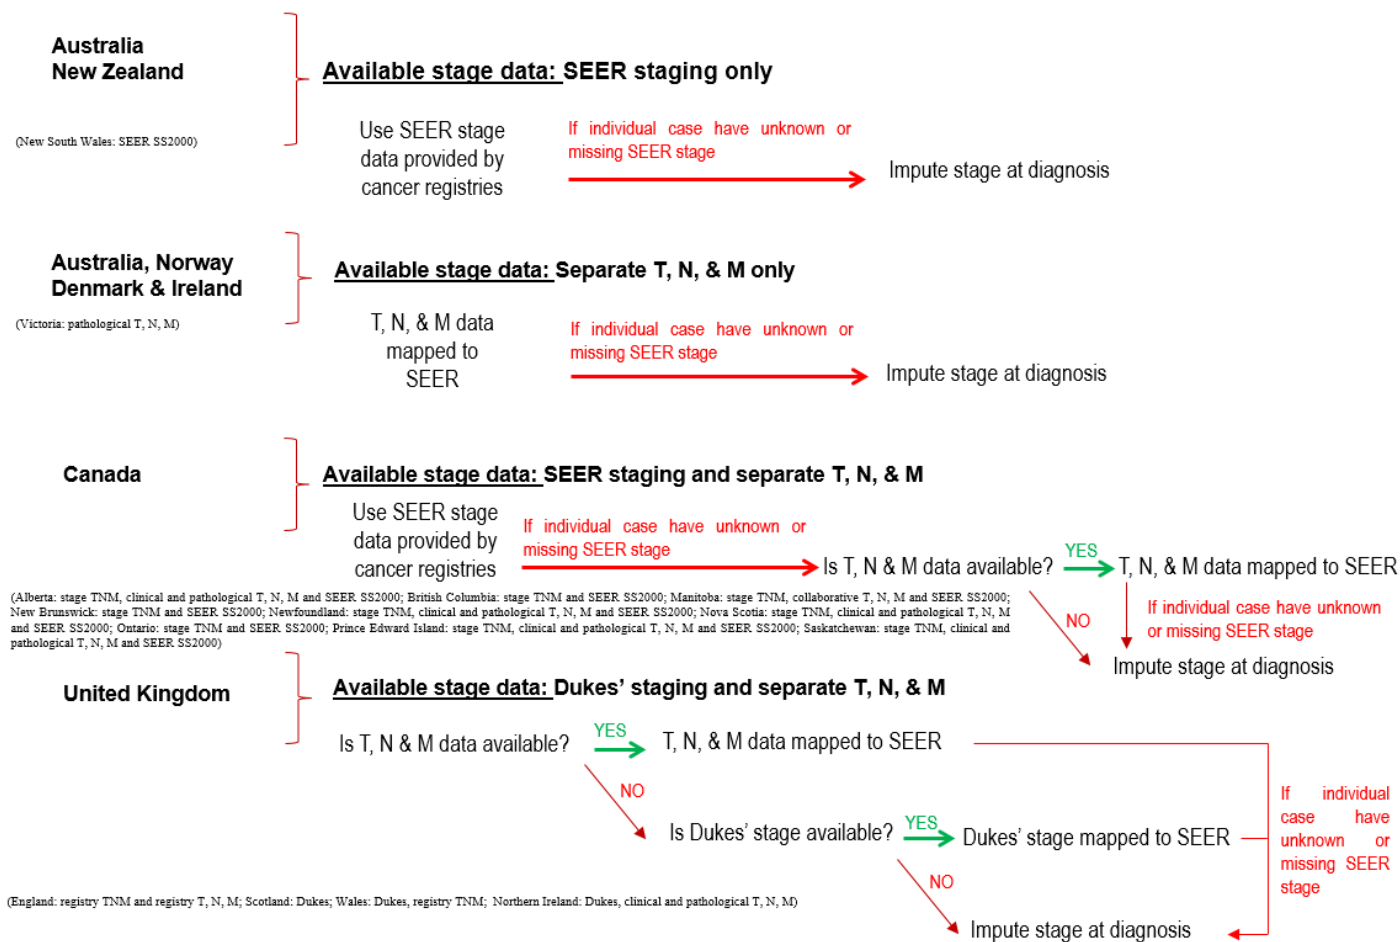

Supplementary Figure 1A. Flow chart of conversion of stage at diagnosis data to produce mapped SEER stage variable

| <b>Stage Grouping</b> | <b>Single TNM</b> | <b>Dukes'</b> | <b>SEER</b>      |
|-----------------------|-------------------|---------------|------------------|
| IV                    | M1                | <b>D</b>      | <b>Distant</b>   |
| III                   | N+<br>T4          | <b>C</b>      | <b>Regional</b>  |
| I, II                 | T1, T2, T3        | <b>A,B</b>    | <b>Localized</b> |

**Supplementary Figure 1B.** Algorithm for mapping TNM stage to SEER stage

**Supplementary Figure 2A.** Proportions of cases diagnosed with colon cancer during 2010-2014 by age, mapped SEER stage and country after imputation of stage at diagnosis

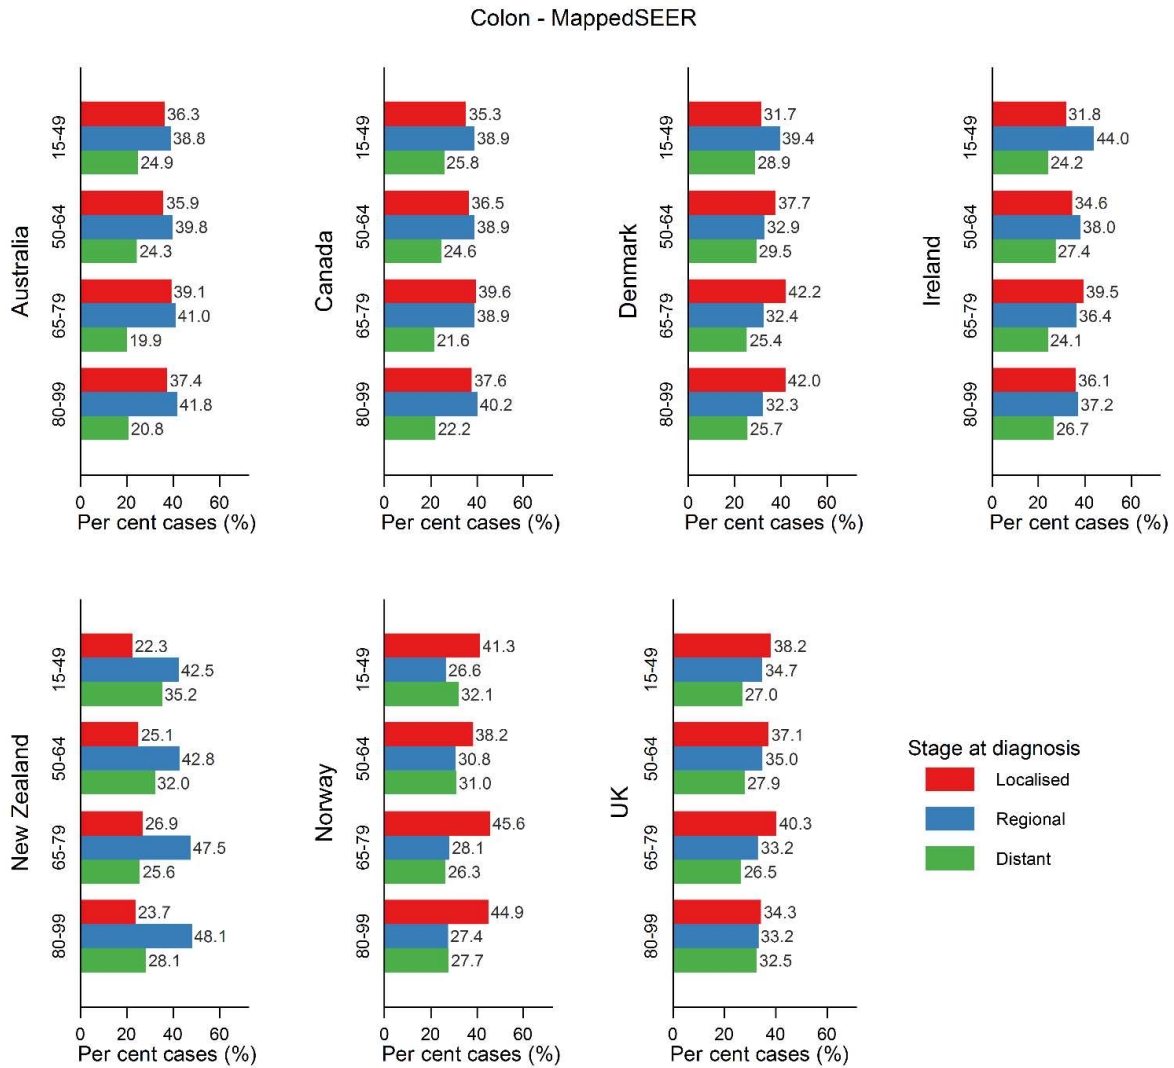

**Supplementary Figure 2B.** Proportions of cases diagnosed with colon cancer during 2010-2014 by age, TNM stage and country after imputation of stage at diagnosis

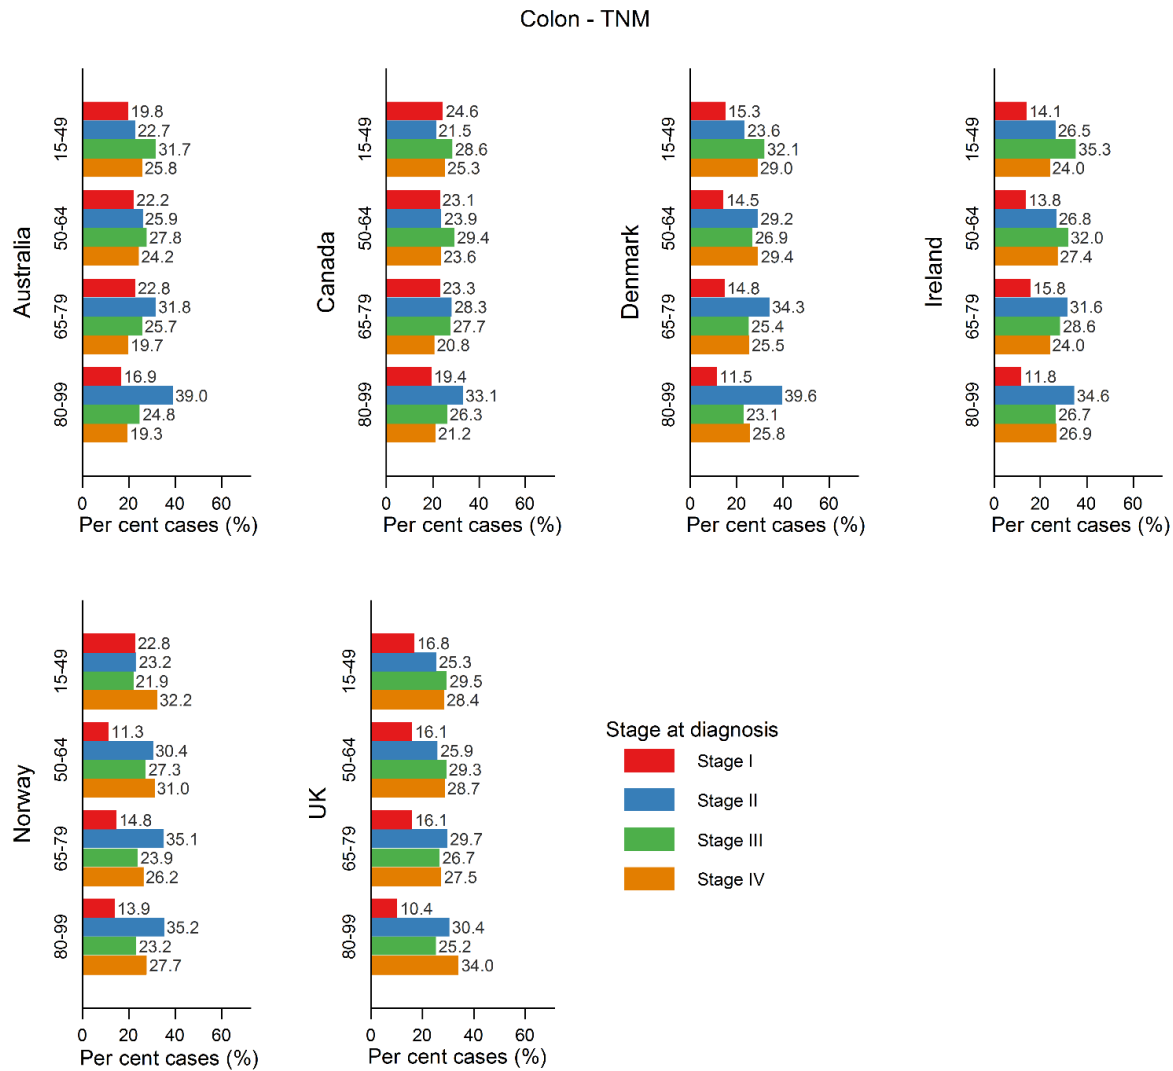

**Supplementary Figure 3A.** Proportions of cases diagnosed with rectal cancer during 2010-2014 by age, mapped SEER stage and country after imputation of stage at diagnosis

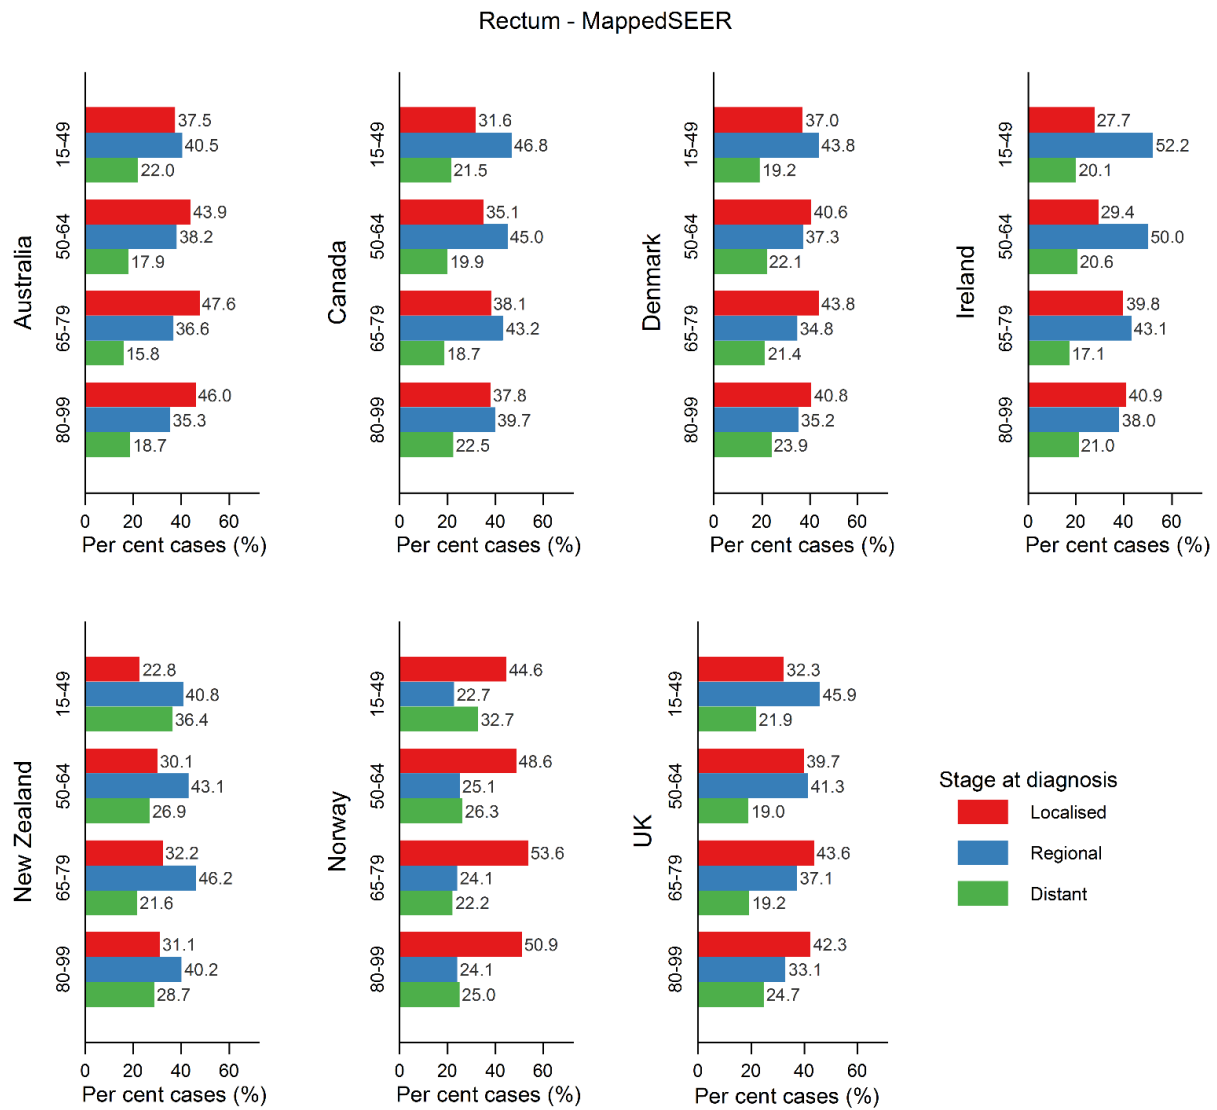

**Supplementary Figure 3B.** Proportions of cases diagnosed with rectal cancer during 2010-2014 by age, TNM stage and country after imputation of stage at diagnosis

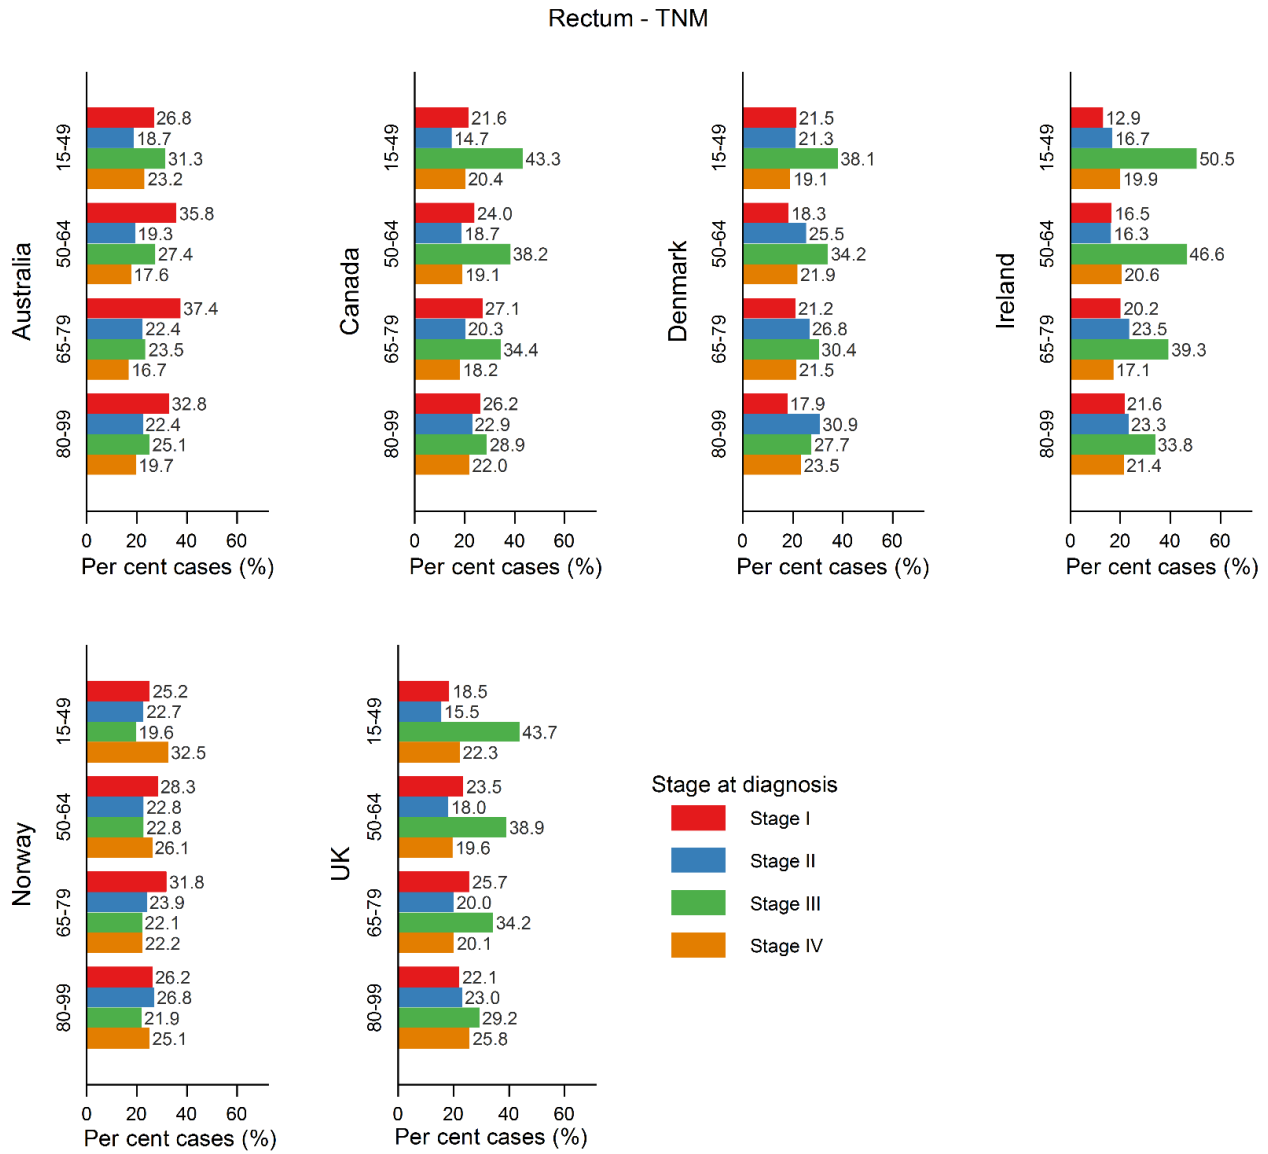

**Supplementary Figure 4A.** Comparison of estimated 1-year and 5-year net survival for colon cancer between original data with unknown or missing stage and imputed stage (SEER) for 2010-2014 study period

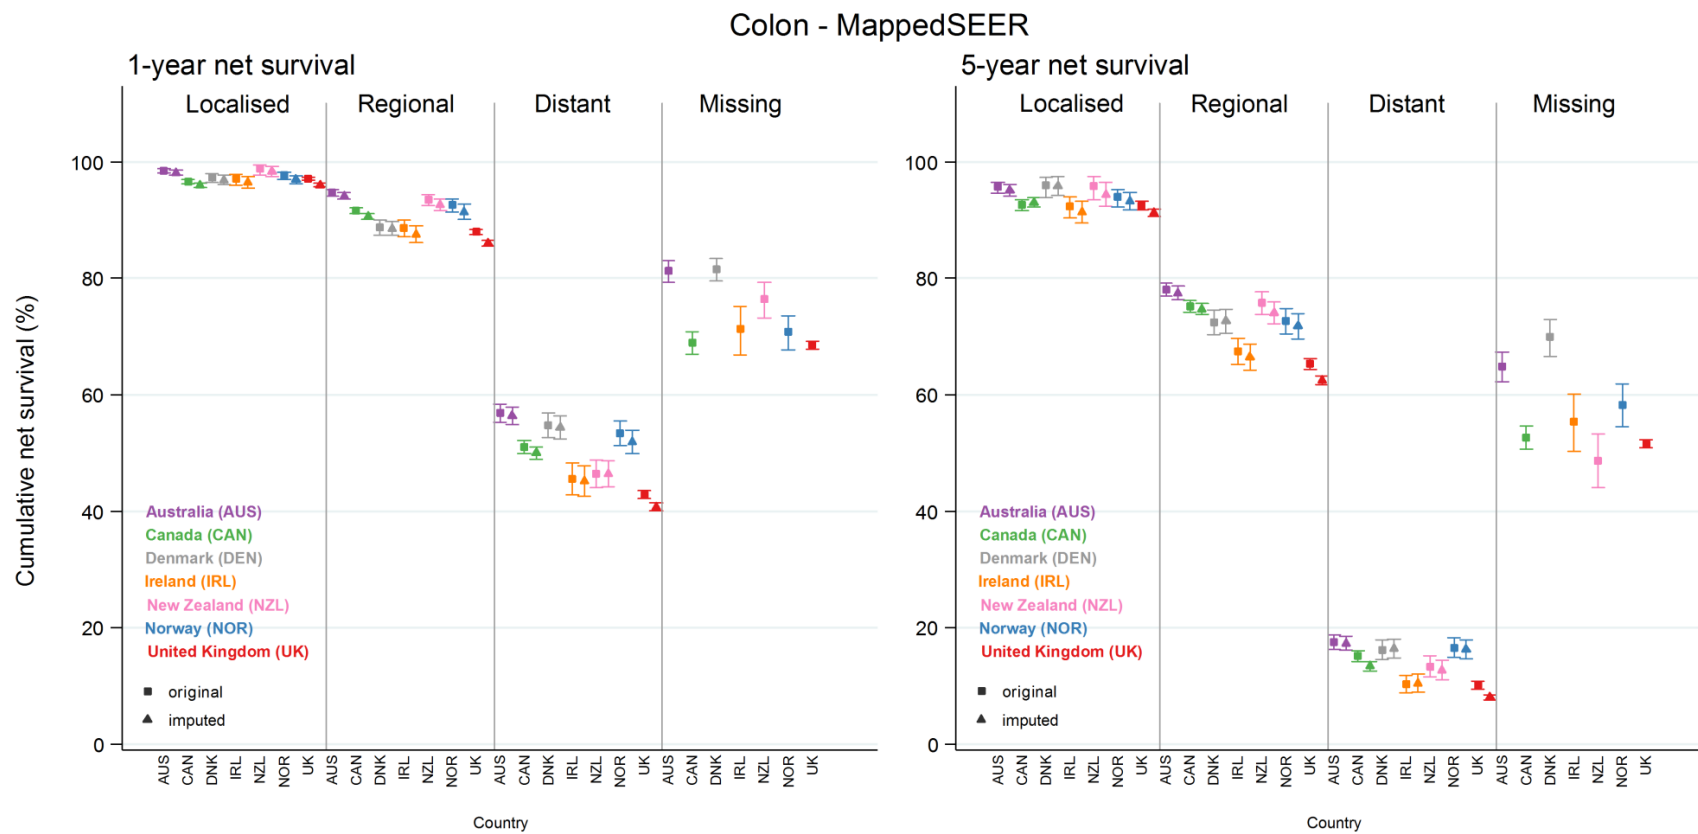

**Supplementary Figure 4B.** Comparison of estimated 1-year and 5-year net survival for colon cancer between original data with unknown or missing stage and imputed stage (TNM) for 2010-2014 study period

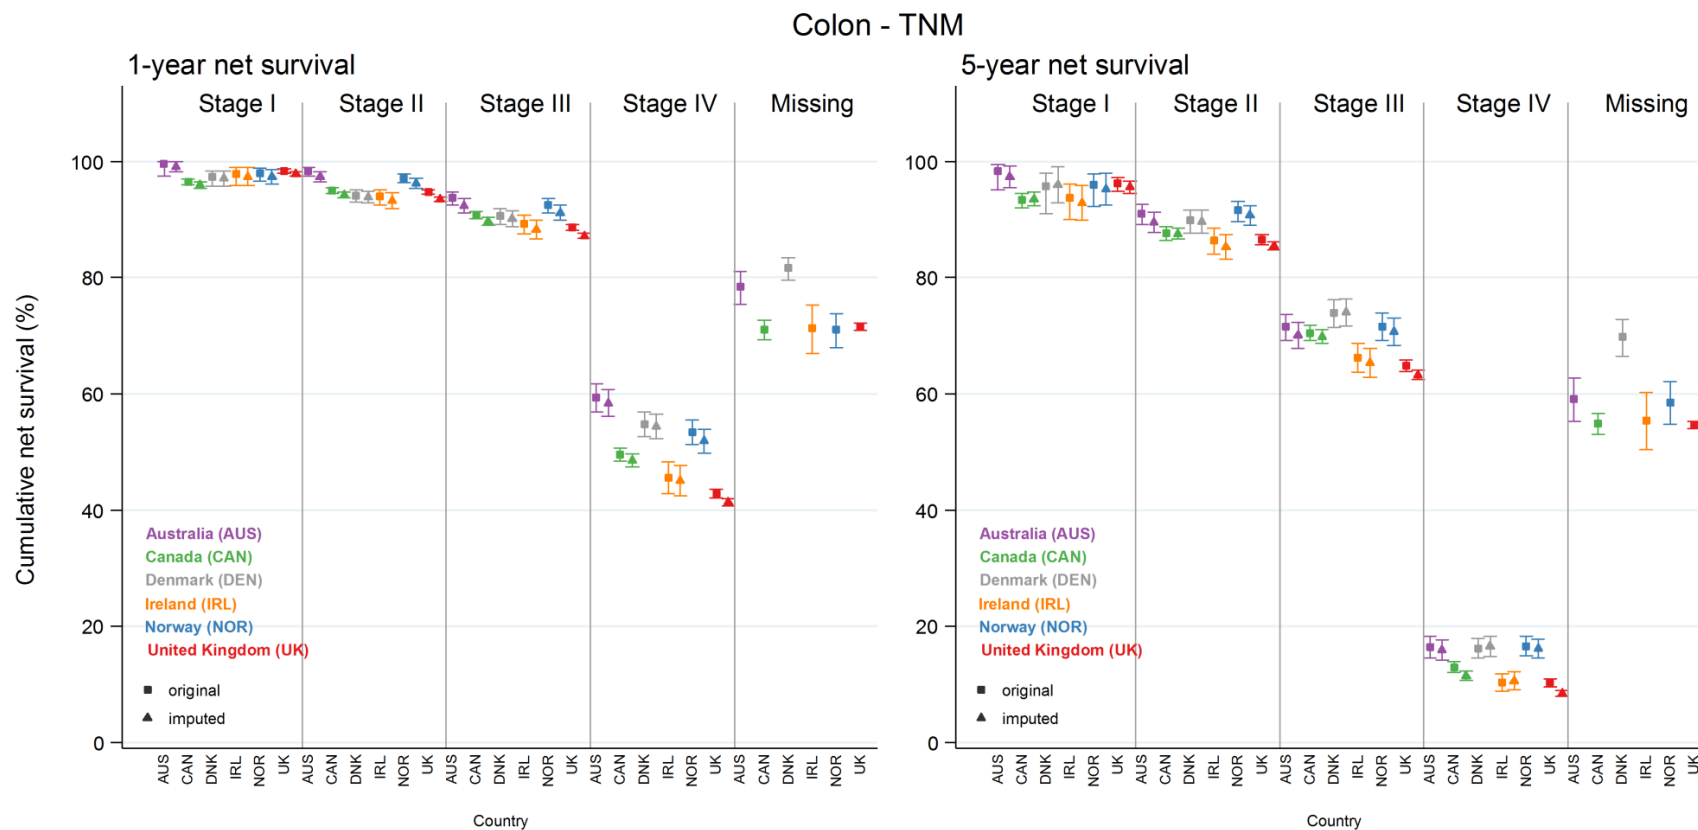



**Supplementary Figure 5A.** Comparison of estimated 1-year and 5-year net survival for rectal cancer between original data with unknown or missing stage and imputed stage (SEER) for 2010-2014 study period

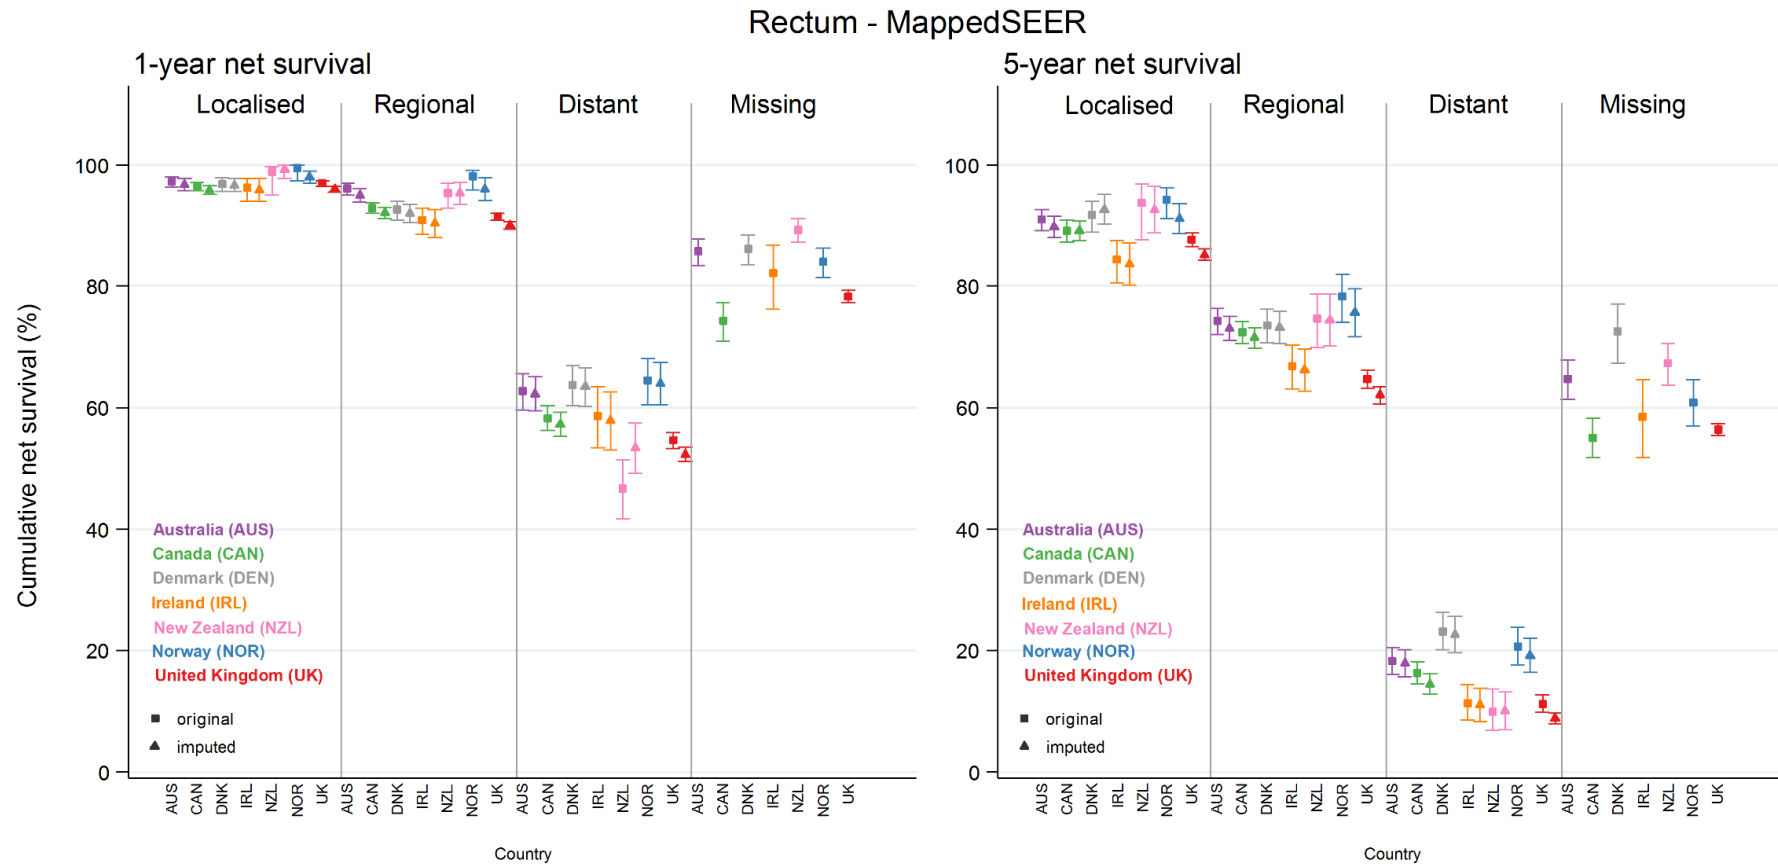

**Supplementary Figure 5B.** Comparison of estimated 1-year and 5-year net survival for rectal cancer between original data with unknown or missing stage and imputed stage (TNM) for 2010-2014 study period

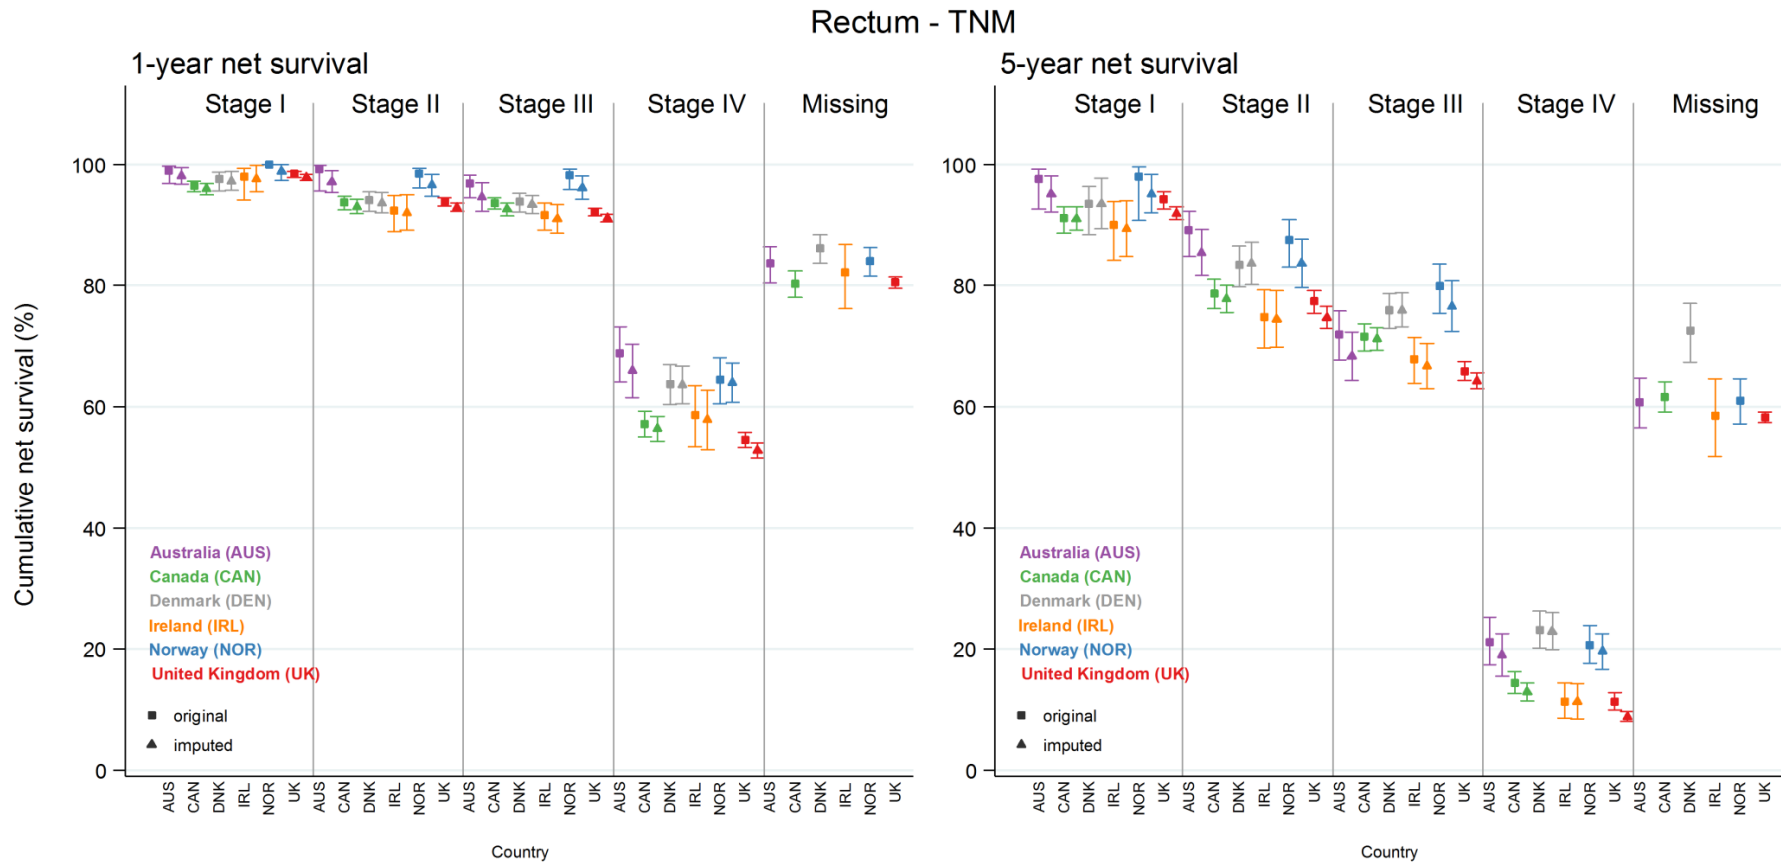

**Supplementary Table 2A.** Proportions with missing or unknown stage for colon cancer in 2010-2014<sup>a</sup>

| Jurisdiction | SEER  | pT    | pN    | pM    | cT    | cN    | cM    | Grouped TNM | cdT   | cdN   | cdM   | collabT | collabN | collabM | regT  | regN  | regM  | regTNM | Duke's |
|--------------|-------|-------|-------|-------|-------|-------|-------|-------------|-------|-------|-------|---------|---------|---------|-------|-------|-------|--------|--------|
| AUS, NSW     | 7.9   | 100.0 | 100.0 | 100.0 | 100.0 | 100.0 | 100.0 | 100.0       | 100.0 | 100.0 | 100.0 | 100.0   | 100.0   | 100.0   | 100.0 | 100.0 | 100.0 | 100.0  | 100.0  |
| AUS, VIC     | 100.0 | 21.4  | 26.9  | 81.2  | 100.0 | 100.0 | 100.0 | 12.1        | 100.0 | 100.0 | 100.0 | 100.0   | 100.0   | 100.0   | 100.0 | 100.0 | 100.0 | 100.0  | 100.0  |
| CAN, ALB     | 2.9   | 18.8  | 24.8  | 91.3  | 91.6  | 82.5  | 8.7   | 5.4         | 100.0 | 100.0 | 100.0 | 100.0   | 100.0   | 100.0   | 100.0 | 100.0 | 100.0 | 100.0  | 100.0  |
| CAN, BCO     | 8.2   | 100.0 | 100.0 | 100.0 | 100.0 | 100.0 | 100.0 | 11.6        | 100.0 | 100.0 | 100.0 | 100.0   | 100.0   | 100.0   | 100.0 | 100.0 | 100.0 | 100.0  | 100.0  |
| CAN, MAN     | 3.1   | 100.0 | 100.0 | 100.0 | 100.0 | 100.0 | 100.0 | 100.0       | 100.0 | 100.0 | 100.0 | 7.9     | 3.9     | 0.0     | 100.0 | 100.0 | 100.0 | 100.0  | 100.0  |
| CAN, NBR     | 6.9   | 100.0 | 100.0 | 100.0 | 100.0 | 100.0 | 100.0 | 7.5         | 100.0 | 100.0 | 100.0 | 100.0   | 100.0   | 100.0   | 100.0 | 100.0 | 100.0 | 100.0  | 100.0  |
| CAN, NFD     | 3.8   | 17.6  | 23.4  | 94.5  | 93.6  | 84.3  | 6.0   | 59.4        | 100.0 | 100.0 | 100.0 | 100.0   | 100.0   | 100.0   | 100.0 | 100.0 | 100.0 | 100.0  | 100.0  |
| CAN, NSC     | 3.0   | 21.3  | 27.0  | 92.9  | 85.9  | 78.4  | 7.2   | 4.3         | 100.0 | 100.0 | 100.0 | 100.0   | 100.0   | 100.0   | 100.0 | 100.0 | 100.0 | 100.0  | 100.0  |
| CAN, ONT     | 10.4  | 100.0 | 100.0 | 100.0 | 100.0 | 100.0 | 100.0 | 11.3        | 100.0 | 100.0 | 100.0 | 100.0   | 100.0   | 100.0   | 100.0 | 100.0 | 100.0 | 100.0  | 100.0  |
| CAN, PEI     | 3.2   | 18.4  | 22.9  | 91.3  | 91.8  | 82.0  | 8.9   | 3.7         | 100.0 | 100.0 | 100.0 | 10.2    | 5.0     | 0.2     | 100.0 | 100.0 | 100.0 | 100.0  | 100.0  |
| CAN, SAS     | 4.0   | 19.8  | 27.1  | 90.5  | 89.2  | 78.4  | 9.6   | 7.5         | 100.0 | 100.0 | 100.0 | 100.0   | 100.0   | 100.0   | 100.0 | 100.0 | 100.0 | 100.0  | 100.0  |
| IRE          | 100.0 | 28.9  | 30.6  | 95.9  | 69.9  | 55.1  | 31.0  | 100.0       | 19.7  | 17.9  | 31.0  | 100.0   | 100.0   | 100.0   | 100.0 | 100.0 | 100.0 | 100.0  | 100.0  |
| NOR          | 5.6   | 23.7  | 24.8  | 97.6  | 93.5  | 93.7  | 92.6  | 100.0       | 52.9  | 30.0  | 5.5   | 100.0   | 100.0   | 100.0   | 100.0 | 100.0 | 100.0 | 100.0  | 23.8   |
| NZ           | 11.1  | 100.0 | 100.0 | 100.0 | 100.0 | 100.0 | 100.0 | 100.0       | 100.0 | 100.0 | 100.0 | 100.0   | 100.0   | 100.0   | 100.0 | 100.0 | 100.0 | 100.0  | 85.7   |
| UK, ENG      | 100.0 | 40.1  | 43.4  | 91.6  | 90.8  | 90.0  | 83.8  | 100.0       | 100.0 | 100.0 | 100.0 | 100.0   | 100.0   | 100.0   | 48.8  | 49.2  | 47.6  | 46.1   | 100.0  |
| UK, NIR      | 100.0 | 27.9  | 34.6  | 94.2  | 98.1  | 92.1  | 17.6  | 14.9        | 17.6  | 18.4  | 3.4   | 100.0   | 100.0   | 100.0   | 100.0 | 100.0 | 100.0 | 100.0  | 17.4   |
| UK, SCO      | 100.0 | 87.1  | 87.4  | 98.2  | 94.4  | 92.2  | 87.0  | 100.0       | 100.0 | 100.0 | 100.0 | 100.0   | 100.0   | 100.0   | 100.0 | 100.0 | 100.0 | 100.0  | 12.8   |
| UK, WAL      | 100.0 | 100.0 | 100.0 | 100.0 | 100.0 | 100.0 | 100.0 | 100.0       | 100.0 | 100.0 | 100.0 | 100.0   | 100.0   | 100.0   | 34.2  | 64.2  | 71.5  | 19.2   | 43.7   |

Abbreviations: SEER=Surveillance, Epidemiology and End Results; TNM=Tumor, nodal, metastasis; p(T/N/M)=pathological(T/N/M); cd(T/N/M)=condensed(T/N/M), collab(T/N/M)=collaborative staging(T/N/M), reg(T/N/M)=registry(T/N/M); AUS=Australia; NSW=New South Wales; VIC=Victoria; CAN=Canada; AB=Alberta; BC=British Columbia; MB=Manitoba; NM=New Brunswick; NF=Newfoundland & Labrador; NS=Nova Scotia; ON=Ontario; PE=Prince Edward Island; QC=Quebec; SK=Saskatchewan; DEN=Denmark; IRE=Ireland; NOR=Norway; NZ=New Zealand; UK=United Kingdom; NIR=Northern Ireland; SCO=Scotland; WAL=Wales

<sup>a</sup> Ireland (2010-2013)

| Jurisdiction | SEER  | pT    | pN    | pM    | cT    | cN    | cM    | Grouped TNM | cdT   | cdN   | cdM   | collabT | collabN | collabM | regT  | regN  | regM  | regTNM | Dukes |
|--------------|-------|-------|-------|-------|-------|-------|-------|-------------|-------|-------|-------|---------|---------|---------|-------|-------|-------|--------|-------|
| AUS, NSW     | 10.8  | 100.0 | 100.0 | 100.0 | 100.0 | 100.0 | 100.0 | 100.0       | 100.0 | 100.0 | 100.0 | 100.0   | 100.0   | 100.0   | 100.0 | 100.0 | 100.0 | 100.0  | 100.0 |
| AUS, VIC     | 100.0 | 29.0  | 35.4  | 85.7  | 100.0 | 100.0 | 100.0 | 20.2        | 100.0 | 100.0 | 100.0 | 100.0   | 100.0   | 100.0   | 100.0 | 100.0 | 100.0 | 100.0  | 100.0 |
| AUS, WES     | 100.0 | 100.0 | 100.0 | 100.0 | 100.0 | 100.0 | 100.0 | 100.0       | 100.0 | 100.0 | 100.0 | 100.0   | 100.0   | 100.0   | 100.0 | 100.0 | 100.0 | 100.0  | 100.0 |
| CAN, AB      | 2.2   | 55.2  | 63.0  | 96.8  | 53.4  | 44.3  | 3.4   | 5.7         | 100.0 | 100.0 | 100.0 | 100.0   | 100.0   | 100.0   | 100.0 | 100.0 | 100.0 | 100.0  | 100.0 |
| CAN, BC      | 7.4   | 100.0 | 100.0 | 100.0 | 100.0 | 100.0 | 100.0 | 18.1        | 100.0 | 100.0 | 100.0 | 100.0   | 100.0   | 100.0   | 100.0 | 100.0 | 100.0 | 100.0  | 100.0 |
| CAN, MB      | 2.1   | 100.0 | 100.0 | 100.0 | 100.0 | 100.0 | 100.0 | 100.0       | 100.0 | 100.0 | 100.0 | 6.9     | 3.3     | 0.2     | 100.0 | 100.0 | 100.0 | 100.0  | 100.0 |
| CAN, NM      | 8.6   | 100.0 | 100.0 | 100.0 | 100.0 | 100.0 | 100.0 | 10.5        | 100.0 | 100.0 | 100.0 | 100.0   | 100.0   | 100.0   | 100.0 | 100.0 | 100.0 | 100.0  | 100.0 |
| CAN, NF      | 3.1   | 58.0  | 65.3  | 97.4  | 55.7  | 45.9  | 3.4   | 49.9        | 100.0 | 100.0 | 100.0 | 100.0   | 100.0   | 100.0   | 100.0 | 100.0 | 100.0 | 100.0  | 100.0 |
| CAN, NS      | 1.9   | 53.4  | 60.3  | 96.6  | 51.8  | 44.7  | 3.5   | 4.2         | 100.0 | 100.0 | 100.0 | 100.0   | 100.0   | 100.0   | 100.0 | 100.0 | 100.0 | 100.0  | 100.0 |
| CAN, ON      | 9.6   | 100.0 | 100.0 | 100.0 | 100.0 | 100.0 | 100.0 | 11.5        | 100.0 | 100.0 | 100.0 | 100.0   | 100.0   | 100.0   | 100.0 | 100.0 | 100.0 | 100.0  | 100.0 |
| CAN, PE      | 1.7   | 57.0  | 71.1  | 96.7  | 48.8  | 34.7  | 5.0   | 5.0         | 100.0 | 100.0 | 100.0 | 5.8     | 5.8     | 1.7     | 100.0 | 100.0 | 100.0 | 100.0  | 100.0 |
| CAN, QC      | 100.0 | 100.0 | 100.0 | 100.0 | 100.0 | 100.0 | 100.0 | 100.0       | 100.0 | 100.0 | 100.0 | 100.0   | 100.0   | 100.0   | 100.0 | 100.0 | 100.0 | 100.0  | 100.0 |
| CAN, SK      | 2.6   | 50.8  | 58.9  | 95.7  | 58.0  | 45.1  | 4.3   | 5.6         | 100.0 | 100.0 | 100.0 | 100.0   | 100.0   | 100.0   | 100.0 | 100.0 | 100.0 | 100.0  | 100.0 |
| DEN          | 100.0 | 100.0 | 100.0 | 100.0 | 22.1  | 31.3  | 16.4  | 100.0       | 100.0 | 100.0 | 100.0 | 100.0   | 100.0   | 100.0   | 100.0 | 100.0 | 100.0 | 100.0  | 100.0 |
| IRE          | 100.0 | 69.7  | 73.2  | 99.1  | 29.6  | 27.7  | 22.8  | 100.0       | 15.5  | 17.5  | 22.8  | 100.0   | 100.0   | 100.0   | 100.0 | 100.0 | 100.0 | 100.0  | 100.0 |
| NOR          | 9.5   | 42.8  | 42.9  | 99.0  | 89.8  | 90.7  | 90.0  | 100.0       | 56.6  | 28.1  | 9.5   | 100.0   | 100.0   | 100.0   | 100.0 | 100.0 | 100.0 | 100.0  | 43.0  |
| NZ           | 44.0  | 100.0 | 100.0 | 100.0 | 100.0 | 100.0 | 100.0 | 100.0       | 100.0 | 100.0 | 100.0 | 100.0   | 100.0   | 100.0   | 100.0 | 100.0 | 100.0 | 100.0  | 94.0  |
| UK, ENG      | 100.0 | 48.7  | 53.7  | 94.9  | 76.4  | 76.9  | 76.4  | 100.0       | 100.0 | 100.0 | 100.0 | 100.0   | 100.0   | 100.0   | 44.0  | 44.8  | 45.3  | 44.3   | 100.0 |
| UK, NIR      | 100.0 | 62.4  | 68.5  | 98.2  | 60.3  | 56.6  | 60.3  | 10.5        | 22.7  | 25.2  | 6.4   | 100.0   | 100.0   | 100.0   | 100.0 | 100.0 | 100.0 | 100.0  | 12.2  |
| UK, SCO      | 100.0 | 88.4  | 88.6  | 98.2  | 88.1  | 89.0  | 88.1  | 100.0       | 100.0 | 100.0 | 100.0 | 100.0   | 100.0   | 100.0   | 100.0 | 100.0 | 100.0 | 100.0  | 20.0  |
| UK, WAL      | 100.0 | 100.0 | 100.0 | 100.0 | 100.0 | 100.0 | 100.0 | 100.0       | 100.0 | 100.0 | 100.0 | 100.0   | 100.0   | 100.0   | 16.8  | 20.2  | 44.7  | 15.1   | 50.9  |

**Supplementary Table 3B.** Proportions with missing or unknown stage for rectal cancer in 2010-2014<sup>a</sup>

Abbreviations: SEER=Surveillance, Epidemiology and End Results; TNM=Tumor, nodal, metastasis; p(T/N/M)=pathological(T/N/M); cd(T/N/M)=condensed(T/N/M), collab(T/N/M)=collaborative staging(T/N/M), reg(T/N/M)=registry(T/N/M); AUS=Australia; NSW=New South Wales; VIC=Victoria; CAN=Canada; AB=Alberta; BC=British Columbia; MB=Manitoba; NM=New Brunswick; NF=Newfoundland & Labrador; NS=Nova Scotia; ON=Ontario; PE=Prince Edward Island; QC=Quebec; SK=Saskatchewan; DEN=Denmark; IRE=Ireland; NOR=Norway; NZ=New Zealand; UK=United Kingdom; NIR=Northern Ireland; SCO=Scotland; WAL=Wales

<sup>a</sup> Ireland (2010-2013)

**Supplementary Table 1A.** Age-standardised and age-specific one-year net survival (%) by (imputed) stage at diagnosis and country for colon cancer patients diagnosed during 2010-2014

| Stage                                |          | Australia <sup>†</sup> | Canada <sup>†</sup> | Denmark             | Ireland <sup>†</sup>  | New Zealand          | Norway              | United Kingdom <sup>†</sup> |
|--------------------------------------|----------|------------------------|---------------------|---------------------|-----------------------|----------------------|---------------------|-----------------------------|
|                                      |          | 1-year NS (95% CI)     | 1-year NS (95% CI)  | 1-year NS (95% CI)  | 1-year NS (95% CI)    | 1-year NS (95% CI)   | 1-year NS (95% CI)  | 1-year NS (95% CI)          |
| All patients <sup>‡</sup>            | All ages | 87.5 (87.0 - 88.0)     | 84.2 (83.8 - 84.6)  | 82.7 (81.8 - 83.5)  | 80.0 (78.9 - 81.0)    | 80.8 (79.9 - 81.8)   | 82.6 (81.8 - 83.4)  | 77.1 (76.8 - 77.4)          |
|                                      | 15-49    | 92.0 (90.6 - 93.2)     | 91.3 (90.2 - 92.3)  | 89.7 (86.5 - 92.2)  | 89.7 (86.5 - 92.2)    | 84.8 (81.3 - 87.8)   | 89.3 (86.4 - 91.6)  | 86.7 (85.8 - 87.5)          |
|                                      | 50-64    | 91.4 (90.5 - 92.2)     | 88.9 (88.2 - 89.5)  | 87.1 (85.5 - 88.5)  | 87.1 (85.5 - 88.5)    | 84.2 (82.2 - 86.0)   | 87.3 (85.7 - 88.7)  | 83.7 (83.2 - 84.3)          |
|                                      | 65-79    | 87.8 (87.1 - 88.5)     | 84.4 (83.8 - 85.0)  | 82.5 (81.4 - 83.6)  | 80.4 (78.7 - 81.9)    | 82.8 (81.5 - 84.1)   | 83.2 (81.9 - 84.3)  | 77.7 (77.3 - 78.2)          |
|                                      | 80-99    | 76.9 (75.5 - 78.1)     | 71.4 (70.4 - 72.4)  | 69.4 (67.2 - 71.5)  | 60.3 (57.4 - 63.2)    | 67.8 (65.5 - 70.0)   | 68.9 (66.9 - 70.9)  | 57.7 (57.1 - 58.3)          |
| <b>TNM Stage<sup>§</sup></b>         |          |                        |                     |                     |                       |                      |                     |                             |
| Stage I                              | All ages | 99.1 (98.2 - 100.0)    | 95.9 (95.4 - 96.5)  | 97.0 (95.8 - 98.3)  | 97.4 (95.9 - 98.9)    |                      | 97.4 (96.1 - 98.6)  | 97.8 (97.4 - 98.2)          |
|                                      | 15-49    | 99.4 (98.0 - 100.0)    | 98.7 (97.8 - 99.7)  | 98.5 (95.3 - 100.0) | 100.0 (100.0 - 100.0) |                      | 99.9 (98.7 - 100.0) | 99.6 (99.1 - 100.0)         |
|                                      | 50-64    | 99.7 (98.8 - 100.0)    | 98.7 (98.1 - 99.3)  | 98.8 (97.1 - 100.0) | 99.4 (97.9 - 100.0)   |                      | 99.4 (97.8 - 100.0) | 99.4 (98.9 - 99.8)          |
|                                      | 65-79    | 98.9 (97.7 - 100.0)    | 96.6 (95.8 - 97.4)  | 97.6 (95.9 - 99.3)  | 98.3 (96.3 - 100.0)   |                      | 97.4 (95.5 - 99.3)  | 98.6 (98.1 - 99.1)          |
|                                      | 80-99    | 98.6 (94.6 - 100.0)    | 87.7 (85.6 - 89.7)  | 90.6 (85.0 - 96.1)  | 89.3 (82.2 - 96.4)    |                      | 92.3 (87.8 - 96.7)  | 91.8 (90.2 - 93.5)          |
| Stage II                             | All ages | 100.0 (99.5 - 100.0)   | 94.2 (93.7 - 94.7)  | 93.9 (92.9 - 94.9)  | 93.2 (91.8 - 94.6)    |                      | 96.2 (95.4 - 97.1)  | 93.5 (93.1 - 93.8)          |
|                                      | 15-49    | 99.6 (98.7 - 100.0)    | 98.2 (97.0 - 99.4)  | 98.5 (95.7 - 100.0) | 98.2 (95.5 - 100.0)   |                      | 99.7 (98.2 - 100.0) | 98.6 (98.0 - 99.3)          |
|                                      | 50-64    | 97.1 (95.7 - 98.4)     | 97.3 (96.6 - 98.1)  | 96.1 (94.3 - 97.9)  | 98.3 (96.8 - 99.9)    |                      | 99.4 (98.5 - 100.0) | 97.4 (96.8 - 97.9)          |
|                                      | 65-79    | 97.1 (95.7 - 98.4)     | 94.8 (93.9 - 95.6)  | 94.1 (92.6 - 95.5)  | 92.9 (90.8 - 95.1)    |                      | 96.3 (94.9 - 97.6)  | 94.3 (93.7 - 94.8)          |
|                                      | 80-99    | 92.6 (89.6 - 95.6)     | 85.5 (83.8 - 87.2)  | 85.7 (82.7 - 88.8)  | 80.5 (75.5 - 85.5)    |                      | 89.2 (86.2 - 92.3)  | 81.7 (80.4 - 83.0)          |
| Stage III                            | All ages | 92.3 (91.1 - 93.6)     | 89.7 (89.0 - 90.3)  | 90.1 (88.7 - 91.5)  | 88.2 (86.6 - 89.9)    |                      | 91.2 (89.9 - 92.5)  | 87.1 (86.7 - 87.6)          |
|                                      | 15-49    | 96.2 (93.7 - 98.7)     | 97.7 (96.6 - 98.9)  | 95.8 (92.2 - 99.4)  | 97.2 (94.7 - 99.7)    |                      | 98.9 (96.6 - 100.0) | 95.9 (94.9 - 97.0)          |
|                                      | 50-64    | 97.5 (96.1 - 98.9)     | 94.8 (93.9 - 95.7)  | 94.8 (92.8 - 96.8)  | 95.6 (93.5 - 97.6)    |                      | 95.8 (93.9 - 97.7)  | 93.7 (93.0 - 94.4)          |
|                                      | 65-79    | 92.5 (90.5 - 94.4)     | 89.9 (88.9 - 90.9)  | 91.5 (89.6 - 93.4)  | 89.8 (87.3 - 92.2)    |                      | 92.1 (90.2 - 94.0)  | 87.8 (87.1 - 88.5)          |
|                                      | 80-99    | 80.3 (76.0 - 84.5)     | 75.4 (73.2 - 77.5)  | 74.3 (69.7 - 78.8)  | 64.7 (58.7 - 70.7)    |                      | 77.1 (72.9 - 81.2)  | 68.3 (66.8 - 69.8)          |
| Stage IV                             | All ages | 58.4 (56.1 - 60.7)     | 48.6 (47.5 - 49.7)  | 54.4 (52.3 - 56.5)  | 45.1 (42.5 - 47.7)    |                      | 51.8 (49.8 - 53.9)  | 41.3 (40.6 - 41.9)          |
|                                      | 15-49    | 73.8 (67.5 - 80.1)     | 69.3 (65.8 - 72.7)  | 71.5 (63.5 - 79.5)  | 67.8 (58.5 - 77.2)    |                      | 66.6 (59.4 - 73.7)  | 58.5 (56.0 - 60.9)          |
|                                      | 50-64    | 70.0 (65.8 - 74.2)     | 60.6 (58.6 - 62.6)  | 65.7 (61.9 - 69.5)  | 57.1 (52.0 - 62.1)    |                      | 63.7 (59.7 - 67.7)  | 52.4 (51.0 - 53.8)          |
|                                      | 65-79    | 56.9 (53.1 - 60.6)     | 44.9 (43.2 - 46.7)  | 50.2 (47.3 - 53.1)  | 42.0 (38.2 - 45.8)    |                      | 50.0 (46.9 - 53.0)  | 37.7 (36.8 - 38.7)          |
|                                      | 80-99    | 31.9 (27.2 - 36.5)     | 22.4 (20.5 - 24.3)  | 31.0 (26.8 - 35.2)  | 17.2 (13.1 - 21.3)    |                      | 24.6 (21.3 - 28.0)  | 18.4 (17.5 - 19.3)          |
| <b>Mapped SEER stage<sup>¶</sup></b> |          |                        |                     |                     |                       |                      |                     |                             |
| Localised                            | All ages | 98.1 (97.7 - 98.6)     | 96.0 (95.6 - 96.4)  | 96.9 (96.1 - 97.7)  | 96.4 (95.4 - 97.4)    | 98.3 (97.4 - 99.2)   | 96.9 (96.3 - 97.6)  | 96.0 (95.7 - 96.3)          |
|                                      | 15-49    | 99.6 (98.9 - 100.0)    | 98.9 (98.1 - 99.6)  | 98.9 (96.5 - 100.0) | 99.4 (98.0 - 100.0)   | 100.0 (99.2 - 100.0) | 99.8 (98.8 - 100.0) | 99.2 (98.8 - 99.7)          |
|                                      | 50-64    | 99.5 (99.0 - 100.0)    | 98.5 (98.0 - 99.0)  | 98.4 (97.1 - 99.7)  | 99.7 (98.8 - 100.0)   | 99.8 (98.8 - 100.0)  | 99.6 (98.8 - 100.0) | 98.6 (98.3 - 99.0)          |
|                                      | 65-79    | 98.5 (97.9 - 99.2)     | 96.5 (95.9 - 97.2)  | 96.9 (95.8 - 98.0)  | 96.7 (95.1 - 98.2)    | 99.0 (97.7 - 100.0)  | 99.6 (98.8 - 100.0) | 96.8 (96.5 - 97.2)          |
|                                      | 80-99    | 93.8 (92.0 - 95.6)     | 88.6 (87.1 - 90.1)  | 92.4 (89.2 - 95.6)  | 87.4 (83.4 - 91.5)    | 92.7 (89.1 - 96.4)   | 97.1 (96.0 - 98.1)  | 87.1 (86.0 - 88.3)          |
| Regional                             | All ages | 94.1 (93.6 - 94.7)     | 90.6 (90.1 - 91.1)  | 88.6 (87.4 - 89.8)  | 87.6 (86.1 - 89.0)    | 92.6 (91.6 - 93.5)   | 91.4 (90.1 - 92.7)  | 86.0 (85.6 - 86.5)          |
|                                      | 15-49    | 97.4 (96.1 - 98.6)     | 97.3 (96.3 - 98.3)  | 96.0 (92.7 - 99.3)  | 97.2 (95.0 - 99.5)    | 97.1 (94.7 - 99.5)   | 99.1 (97.4 - 100.0) | 95.6 (94.6 - 96.6)          |
|                                      | 50-64    | 97.5 (96.8 - 98.3)     | 95.4 (94.6 - 96.1)  | 93.4 (91.5 - 95.4)  | 95.1 (93.1 - 97.1)    | 96.1 (94.5 - 97.7)   | 95.9 (94.2 - 97.7)  | 93.2 (92.5 - 93.8)          |
|                                      | 65-79    | 94.2 (93.3 - 95.1)     | 90.9 (90.1 - 91.8)  | 89.7 (88.0 - 91.4)  | 88.5 (86.3 - 90.8)    | 93.5 (92.1 - 94.9)   | 91.9 (90.1 - 93.6)  | 86.5 (85.8 - 87.2)          |
|                                      | 80-99    | 85.5 (83.5 - 87.5)     | 77.8 (76.2 - 79.4)  | 71.4 (67.4 - 75.3)  | 64.7 (59.7 - 69.8)    | 81.3 (78.2 - 84.3)   | 78.3 (73.9 - 82.7)  | 66.2 (65.0 - 67.3)          |
| Distant                              | All ages | 56.4 (54.9 - 57.9)     | 50.0 (48.9 - 51.1)  | 54.4 (52.4 - 56.4)  | 45.2 (42.6 - 47.8)    | 46.4 (44.1 - 48.6)   | 51.9 (49.9 - 53.9)  | 40.7 (40.0 - 41.4)          |
|                                      | 15-49    | 72.9 (68.6 - 77.1)     | 70.2 (66.8 - 73.6)  | 71.8 (63.8 - 79.8)  | 67.9 (58.7 - 77.1)    | 60.1 (52.6 - 67.7)   | 66.3 (59.2 - 73.5)  | 57.0 (54.5 - 59.6)          |
|                                      | 50-64    | 69.4 (66.6 - 72.1)     | 61.8 (59.8 - 63.8)  | 66.0 (62.1 - 69.8)  | 57.0 (51.9 - 62.1)    | 55.6 (51.0 - 60.2)   | 63.9 (60.0 - 67.8)  | 51.7 (50.4 - 53.1)          |
|                                      | 65-79    | 53.2 (50.8 - 55.7)     | 46.6 (44.8 - 48.3)  | 50.4 (47.6 - 53.2)  | 42.2 (38.2 - 46.1)    | 45.2 (41.8 - 48.5)   | 50.1 (47.1 - 53.0)  | 37.4 (36.5 - 38.4)          |
|                                      | 80-99    | 30.0 (27.2 - 32.8)     | 24.1 (22.2 - 26.0)  | 30.2 (26.3 - 34.1)  | 17.7 (13.6 - 21.9)    | 24.7 (21.1 - 28.3)   | 24.6 (21.3 - 28.0)  | 18.1 (17.2 - 19.1)          |

Abbreviation: NS = net survival, CI = confidence interval

All ages=Age-standardised

<sup>†</sup>Australia includes Victoria (Data on both TNM and SEER) and New South Wales (Data on SEER only)<sup>†</sup>Canada includes Alberta, British Columbia, New Brunswick, Manitoba, Newfoundland, Nova Scotia, Ontario, Prince Edward Island, and Saskatchewan; Ireland (2010-2013); United Kingdom includes England, Northern Ireland, Scotland, and Wales<sup>‡</sup>Model1: Age spline with mapped SEER stage as time-dependent covariate<sup>¶</sup>Model2: Age spline allowing separate models for each stage category

**Supplementary Table 2B.** Age-standardised and age-specific five-year net survival (%) by (imputed) stage at diagnosis and country for colon cancer patients diagnosed during 2010-2014

| Stage                                |          | Australia <sup>1</sup> | Canada <sup>1</sup> | Denmark              | Ireland <sup>1</sup> | New Zealand         | Norway               | United Kingdom <sup>1</sup> |
|--------------------------------------|----------|------------------------|---------------------|----------------------|----------------------|---------------------|----------------------|-----------------------------|
|                                      |          | 5-year NS (95% CI)     | 5-year NS (95% CI)  | 5-year NS (95% CI)   | 5-year NS (95% CI)   | 5-year NS (95% CI)  | 5-year NS (95% CI)   | 5-year NS (95% CI)          |
| All patients <sup>2</sup>            | All ages | 70.9 (70.2 - 71.6)     | 70.8 (70.2 - 71.3)  | 65.5 (64.2 - 66.7)   | 60.9 (59.5 - 62.2)   | 62.1 (60.8 - 63.4)  | 65.4 (64.2 - 66.5)   | 59.1 (58.7 - 59.4)          |
|                                      | 15-49    | 73.7 (71.5 - 75.8)     | 73.9 (72.3 - 75.5)  | 66.4 (61.8 - 70.6)   | 72.6 (68.4 - 76.4)   | 63.4 (58.9 - 67.5)  | 69.2 (65.1 - 72.9)   | 67.1 (65.9 - 68.3)          |
|                                      | 50-64    | 73.0 (71.7 - 74.3)     | 72.8 (72.0 - 73.7)  | 66.8 (64.7 - 68.8)   | 65.4 (63.0 - 67.7)   | 63.2 (60.7 - 65.6)  | 67.9 (65.7 - 69.9)   | 64.2 (63.5 - 64.8)          |
|                                      | 65-79    | 71.8 (70.7 - 72.8)     | 71.0 (70.2 - 71.8)  | 64.6 (62.9 - 66.2)   | 60.6 (58.6 - 62.6)   | 64.5 (62.7 - 66.3)  | 65.3 (63.6 - 66.9)   | 60.6 (60.1 - 61.1)          |
|                                      | 80-99    | 63.4 (61.1 - 65.5)     | 64.6 (63.0 - 66.2)  | 64.6 (60.6 - 68.3)   | 44.7 (40.8 - 48.6)   | 53.3 (49.8 - 56.6)  | 58.4 (55.2 - 61.5)   | 41.3 (40.5 - 42.2)          |
| <b>TNM Stage<sup>3</sup></b>         |          |                        |                     |                      |                      |                     |                      |                             |
| Stage I                              | All ages | 97.4 (95.5 - 99.2)     | 93.5 (92.4 - 94.7)  | 95.9 (92.8 - 99.1)   | 92.9 (89.9 - 95.9)   |                     | 95.2 (92.5 - 97.9)   | 95.6 (94.5 - 96.6)          |
|                                      | 15-49    | 97.3 (94.2 - 100.0)    | 95.0 (92.5 - 97.6)  | 92.8 (85.9 - 99.6)   | 95.9 (90.4 - 100.0)  |                     | 100.0 (98.9 - 100.0) | 95.8 (94.1 - 97.4)          |
|                                      | 50-64    | 96.6 (94.3 - 98.8)     | 95.5 (94.3 - 96.7)  | 93.6 (89.4 - 97.9)   | 95.8 (92.3 - 99.2)   |                     | 95.7 (92.0 - 99.3)   | 95.9 (94.9 - 97.0)          |
|                                      | 65-79    | 96.0 (93.3 - 98.6)     | 94.7 (93.1 - 96.3)  | 95.3 (91.4 - 99.3)   | 94.2 (89.9 - 98.4)   |                     | 93.3 (89.6 - 97.1)   | 97.2 (96.1 - 98.4)          |
|                                      | 80-99    | 100.0 (94.2 - 100.0)   | 86.4 (82.1 - 90.8)  | 100.0 (89.5 - 100.0) | 81.9 (69.3 - 94.5)   |                     | 96.3 (86.2 - 100.0)  | 91.1 (86.9 - 95.4)          |
| Stage II                             | All ages | 89.5 (87.8 - 91.2)     | 87.6 (86.6 - 88.5)  | 89.7 (87.7 - 91.6)   | 85.2 (83.1 - 87.4)   |                     | 90.7 (89.0 - 92.4)   | 85.4 (84.7 - 86.1)          |
|                                      | 15-49    | 93.6 (89.5 - 97.8)     | 92.5 (90.0 - 95.0)  | 91.2 (85.2 - 97.2)   | 93.9 (89.4 - 98.4)   |                     | 94.6 (90.7 - 98.5)   | 90.9 (89.2 - 92.5)          |
|                                      | 50-64    | 93.8 (91.4 - 96.3)     | 89.9 (88.4 - 91.3)  | 78.0 (74.5 - 81.5)   | 91.7 (88.7 - 94.7)   |                     | 93.7 (91.3 - 96.1)   | 88.9 (87.7 - 90.1)          |
|                                      | 65-79    | 88.0 (85.4 - 90.5)     | 86.3 (84.8 - 87.8)  | 86.8 (84.2 - 89.4)   | 83.1 (79.8 - 86.4)   |                     | 90.2 (87.8 - 92.7)   | 86.3 (85.3 - 87.4)          |
|                                      | 80-99    | 83.2 (77.0 - 89.3)     | 83.6 (80.3 - 86.9)  | 94.4 (87.3 - 100.0)  | 72.2 (64.3 - 80.1)   |                     | 83.9 (77.8 - 90.0)   | 74.1 (72.2 - 76.0)          |
| Stage III                            | All ages | 70.1 (67.8 - 72.3)     | 69.9 (68.7 - 71.1)  | 74.0 (71.7 - 76.3)   | 65.3 (62.9 - 67.8)   |                     | 70.7 (68.4 - 73.1)   | 63.3 (62.4 - 64.1)          |
|                                      | 15-49    | 80.0 (74.5 - 85.5)     | 81.5 (78.5 - 84.5)  | 79.7 (72.4 - 86.9)   | 83.8 (78.4 - 89.2)   |                     | 78.4 (71.3 - 85.5)   | 77.0 (74.9 - 79.1)          |
|                                      | 50-64    | 77.5 (74.0 - 81.1)     | 77.6 (75.9 - 79.2)  | 78.0 (74.5 - 81.5)   | 74.4 (70.6 - 78.2)   |                     | 77.0 (73.2 - 80.7)   | 72.0 (70.7 - 73.3)          |
|                                      | 65-79    | 68.4 (65.0 - 71.7)     | 68.7 (66.9 - 70.5)  | 74.6 (71.5 - 77.8)   | 65.0 (61.3 - 68.7)   |                     | 68.9 (65.5 - 72.2)   | 63.6 (62.4 - 64.7)          |
|                                      | 80-99    | 54.4 (47.8 - 61.0)     | 52.0 (48.4 - 55.6)  | 61.0 (52.7 - 69.3)   | 35.3 (28.1 - 42.4)   |                     | 59.0 (52.3 - 65.7)   | 37.9 (35.9 - 40.0)          |
| Stage IV                             | All ages | 15.9 (14.1 - 17.7)     | 11.5 (10.7 - 12.3)  | 16.5 (14.8 - 18.2)   | 10.6 (9.0 - 12.1)    |                     | 16.1 (14.5 - 17.8)   | 8.5 (8.0 - 8.9)             |
|                                      | 15-49    | 28.2 (21.5 - 34.9)     | 21.0 (17.9 - 24.1)  | 21.4 (14.5 - 28.4)   | 20.2 (12.8 - 27.7)   |                     | 23.1 (16.6 - 29.6)   | 16.3 (13.9 - 18.7)          |
|                                      | 50-64    | 19.5 (16.0 - 22.9)     | 16.0 (14.4 - 17.7)  | 23.4 (20.1 - 26.7)   | 14.6 (11.4 - 17.9)   |                     | 23.0 (19.4 - 26.5)   | 12.2 (11.3 - 13.2)          |
|                                      | 65-79    | 14.7 (11.9 - 17.5)     | 9.5 (8.3 - 10.6)    | 13.0 (11.0 - 15.0)   | 8.2 (6.3 - 10.1)     |                     | 12.8 (10.7 - 15.0)   | 6.6 (6.0 - 7.1)             |
|                                      | 80-99    | 4.5 (2.1 - 6.9)        | 2.2 (1.3 - 3.0)     | 8.7 (5.7 - 11.7)     | 2.3 (0.5 - 4.1)      |                     | 6.7 (4.3 - 9.1)      | 1.3 (1.0 - 1.7)             |
| <b>Mapped SEER stage<sup>4</sup></b> |          |                        |                     |                      |                      |                     |                      |                             |
| Localised                            | All ages | 95.1 (94.1 - 96.0)     | 93.0 (92.2 - 93.9)  | 95.8 (94.2 - 97.5)   | 91.4 (89.5 - 93.2)   | 94.4 (92.3 - 96.4)  | 93.2 (91.8 - 94.7)   | 91.2 (90.7 - 91.8)          |
|                                      | 15-49    | 96.2 (94.4 - 98.0)     | 94.9 (93.2 - 96.6)  | 93.5 (88.9 - 98.1)   | 97.5 (94.7 - 100.0)  | 96.8 (92.5 - 100.0) | 97.8 (95.3 - 100.0)  | 93.5 (92.1 - 95.0)          |
|                                      | 50-64    | 96.4 (95.2 - 97.6)     | 94.5 (93.4 - 95.5)  | 94.2 (91.8 - 96.5)   | 95.9 (93.8 - 98.0)   | 95.5 (92.8 - 98.2)  | 94.9 (92.8 - 96.9)   | 92.9 (92.1 - 93.6)          |
|                                      | 65-79    | 94.8 (93.4 - 96.1)     | 92.5 (91.2 - 93.8)  | 93.2 (90.9 - 95.5)   | 91.6 (88.9 - 94.3)   | 94.1 (91.4 - 96.9)  | 92.1 (90.1 - 94.2)   | 92.6 (91.6 - 93.5)          |
|                                      | 80-99    | 92.7 (88.9 - 96.6)     | 90.5 (87.3 - 93.6)  | 100.0 (99.1 - 100.0) | 78.2 (70.7 - 85.7)   | 91.3 (83.5 - 99.1)  | 89.6 (84.1 - 95.1)   | 84.2 (82.2 - 86.2)          |
| Regional                             | All ages | 77.5 (76.3 - 78.6)     | 74.7 (73.7 - 75.7)  | 72.6 (70.6 - 74.7)   | 66.4 (64.2 - 68.6)   | 74.1 (72.2 - 75.9)  | 71.8 (69.6 - 73.9)   | 62.5 (61.7 - 63.3)          |
|                                      | 15-49    | 86.1 (83.3 - 88.8)     | 84.5 (82.1 - 86.9)  | 80.8 (74.5 - 87.0)   | 84.0 (79.1 - 88.8)   | 80.3 (74.9 - 85.6)  | 79.6 (73.2 - 85.9)   | 76.3 (74.4 - 78.2)          |
|                                      | 50-64    | 82.3 (80.5 - 84.1)     | 80.9 (79.5 - 82.3)  | 76.6 (73.3 - 79.9)   | 75.0 (71.5 - 78.4)   | 77.4 (73.9 - 80.9)  | 78.3 (74.8 - 81.8)   | 71.6 (70.4 - 72.8)          |
|                                      | 65-79    | 76.2 (74.5 - 77.9)     | 73.6 (72.2 - 75.0)  | 72.6 (69.7 - 75.4)   | 64.3 (61.0 - 67.6)   | 74.5 (71.9 - 77.1)  | 69.8 (66.6 - 73.1)   | 62.5 (61.4 - 63.7)          |
|                                      | 80-99    | 66.1 (62.6 - 69.7)     | 60.6 (57.8 - 63.5)  | 59.1 (52.4 - 65.9)   | 42.7 (35.7 - 49.7)   | 62.2 (57.0 - 67.4)  | 59.8 (53.2 - 66.5)   | 36.8 (35.1 - 38.5)          |
| Distant                              | All ages | 17.3 (16.2 - 18.5)     | 13.4 (12.5 - 14.2)  | 16.4 (14.8 - 18.1)   | 10.5 (9.0 - 12.0)    | 12.7 (11.0 - 14.4)  | 16.3 (14.6 - 17.9)   | 8.0 (7.5 - 8.5)             |
|                                      | 15-49    | 27.1 (22.9 - 31.3)     | 22.6 (19.4 - 25.9)  | 21.6 (14.7 - 28.4)   | 20.2 (12.8 - 27.7)   | 19.7 (13.1 - 26.2)  | 23.3 (16.9 - 29.7)   | 14.7 (12.5 - 16.9)          |
|                                      | 50-64    | 22.5 (20.1 - 24.9)     | 18.3 (16.7 - 19.8)  | 23.6 (20.2 - 27.0)   | 14.4 (11.3 - 17.6)   | 16.1 (12.6 - 19.6)  | 23.0 (19.6 - 26.5)   | 11.7 (10.7 - 12.6)          |
|                                      | 65-79    | 15.3 (13.5 - 17.0)     | 11.7 (10.5 - 12.9)  | 12.9 (10.9 - 14.9)   | 8.2 (6.3 - 10.1)     | 11.2 (8.9 - 13.5)   | 13.0 (10.8 - 15.1)   | 6.3 (5.8 - 6.9)             |
|                                      | 80-99    | 6.6 (4.7 - 8.4)        | 2.8 (1.9 - 3.7)     | 8.3 (5.3 - 11.3)     | 2.3 (0.6 - 4.1)      | 5.1 (2.1 - 8.0)     | 6.9 (4.4 - 9.3)      | 1.3 (0.9 - 1.6)             |

Abbreviation: NS = net survival, CI = confidence interval

All ages=Age-standardised

<sup>1</sup>Australia includes Victoria (Data on both TNM and SEER) and New South Wales (Data on SEER only)<sup>2</sup>Canada includes Alberta, British Columbia, New Brunswick, Manitoba, Newfoundland, Nova Scotia, Ontario, Prince Edward Island, and Saskatchewan; Ireland (2010-2013); United Kingdom includes England, Northern Ireland, Scotland, and Wales<sup>3</sup>Model1: Age spline with mapped SEER stage as time-dependent covariate<sup>4</sup>Model2: Age spline allowing separate models for each stage category

**Supplementary Table 2A.** Age-standardised and age-specific one-year net survival (%) by (imputed) stage at diagnosis and country for rectal cancer patients diagnosed during 2010-2014

| Stage                                |          | Australia <sup>1</sup> | Canada <sup>1</sup>  | Denmark               | Ireland <sup>1</sup>  | New Zealand           | Norway              | United Kingdom <sup>1</sup> |
|--------------------------------------|----------|------------------------|----------------------|-----------------------|-----------------------|-----------------------|---------------------|-----------------------------|
|                                      |          | 1-year NS (95% CI)     | 1-year NS (95% CI)   | 1-year NS (95% CI)    | 1-year NS (95% CI)    | 1-year NS (95% CI)    | 1-year NS (95% CI)  | 1-year NS (95% CI)          |
| All patients <sup>2</sup>            | All ages | 90.0 (89.2 - 90.7)     | 87.3 (86.7 - 87.9)   | 87.5 (86.5 - 88.5)    | 86.3 (84.6 - 87.8)    | 85.9 (84.5 - 87.3)    | 89.1 (88.0 - 90.2)  | 84.8 (84.4 - 85.2)          |
|                                      | 15-49    | 95.9 (94.3 - 97.1)     | 94.9 (93.6 - 95.9)   | 92.7 (88.8 - 95.3)    | 92.7 (88.8 - 95.3)    | 90.4 (86.0 - 93.4)    | 92.6 (88.8 - 95.2)  | 90.6 (89.4 - 91.7)          |
|                                      | 50-64    | 94.0 (93.0 - 95.0)     | 91.9 (91.1 - 92.7)   | 92.1 (90.5 - 93.5)    | 92.1 (90.5 - 93.5)    | 91.3 (89.0 - 93.1)    | 94.5 (92.9 - 95.8)  | 90.9 (90.3 - 91.5)          |
|                                      | 65-79    | 89.4 (88.1 - 90.5)     | 87.6 (86.6 - 88.5)   | 87.7 (86.2 - 89.0)    | 87.2 (84.7 - 89.3)    | 85.6 (83.3 - 87.6)    | 90.4 (88.7 - 91.8)  | 84.9 (84.3 - 85.4)          |
|                                      | 80-99    | 80.2 (77.4 - 82.7)     | 74.2 (72.0 - 76.2)   | 73.3 (69.7 - 76.5)    | 69.0 (63.2 - 74.1)    | 74.2 (69.3 - 78.4)    | 75.0 (71.1 - 78.5)  | 69.8 (68.6 - 70.9)          |
| <b>TNM Stage<sup>3</sup></b>         |          |                        |                      |                       |                       |                       |                     |                             |
| Stage I                              | All ages | 98.1 (96.7 - 99.5)     | 95.9 (95.0 - 96.9)   | 97.2 (95.7 - 98.8)    | 97.6 (95.4 - 99.8)    |                       | 98.8 (97.3 - 100.0) | 97.8 (97.3 - 98.3)          |
|                                      | 15-49    | 100.0 (100.0 - 100.0)  | 100.0 (99.8 - 100.0) | 100.0 (100.0 - 100.0) | 100.0 (100.0 - 100.0) |                       | 99.9 (98.4 - 100.0) | 98.9 (97.8 - 100.0)         |
|                                      | 50-64    | 99.7 (98.6 - 100.0)    | 98.7 (97.8 - 99.6)   | 99.0 (97.1 - 100.0)   | 99.8 (98.2 - 100.0)   |                       | 99.7 (98.5 - 100.0) | 99.2 (98.7 - 99.8)          |
|                                      | 65-79    | 96.7 (94.5 - 98.9)     | 96.2 (94.8 - 97.6)   | 97.3 (95.3 - 99.2)    | 96.9 (93.4 - 100.0)   |                       | 99.6 (98.1 - 100.0) | 98.3 (97.6 - 99.0)          |
|                                      | 80-99    | 97.2 (91.5 - 100.0)    | 87.4 (83.4 - 91.4)   | 91.3 (83.5 - 99.0)    | 94.7 (85.3 - 100.0)   |                       | 94.4 (86.4 - 100.0) | 92.9 (91.0 - 94.9)          |
| Stage II                             | All ages | 100.0 (100.0 - 100.0)  | 93.0 (91.8 - 94.2)   | 93.6 (91.9 - 95.3)    | 92.0 (89.1 - 95.0)    |                       | 96.6 (94.7 - 98.4)  | 92.9 (92.2 - 93.6)          |
|                                      | 15-49    | 98.4 (96.1 - 100.0)    | 99.0 (97.5 - 100.0)  | 97.1 (92.3 - 100.0)   | 96.7 (90.1 - 100.0)   |                       | 99.3 (95.9 - 100.0) | 98.5 (97.0 - 99.9)          |
|                                      | 50-64    | 97.3 (94.3 - 100.0)    | 96.0 (94.5 - 97.4)   | 96.1 (93.9 - 98.4)    | 94.0 (89.6 - 98.4)    |                       | 99.5 (98.0 - 100.0) | 97.4 (96.5 - 98.3)          |
|                                      | 65-79    | 97.3 (94.3 - 100.0)    | 93.5 (91.7 - 95.3)   | 94.3 (92.1 - 96.4)    | 92.2 (88.2 - 96.2)    |                       | 97.1 (94.8 - 99.5)  | 92.5 (91.3 - 93.7)          |
|                                      | 80-99    | 92.1 (84.9 - 99.3)     | 83.0 (78.6 - 87.4)   | 83.4 (76.8 - 90.0)    | 84.2 (73.2 - 95.2)    |                       | 88.8 (81.1 - 96.4)  | 81.8 (79.5 - 84.1)          |
| Stage III                            | All ages | 94.5 (92.2 - 96.9)     | 92.6 (91.5 - 93.6)   | 93.3 (91.8 - 94.8)    | 91.0 (88.6 - 93.3)    |                       | 96.1 (94.2 - 98.1)  | 91.1 (90.5 - 91.7)          |
|                                      | 15-49    | 99.5 (97.9 - 100.0)    | 98.4 (97.3 - 99.5)   | 97.5 (94.2 - 100.0)   | 100.0 (100.0 - 100.0) |                       | 99.6 (97.2 - 100.0) | 95.5 (94.0 - 96.9)          |
|                                      | 50-64    | 97.2 (94.7 - 99.8)     | 96.4 (95.4 - 97.3)   | 97.7 (96.1 - 99.4)    | 96.1 (93.8 - 98.4)    |                       | 99.1 (97.2 - 100.0) | 96.1 (95.4 - 96.8)          |
|                                      | 65-79    | 94.3 (90.0 - 98.6)     | 93.0 (91.5 - 94.4)   | 93.3 (91.2 - 95.4)    | 93.1 (90.2 - 96.1)    |                       | 97.9 (95.4 - 100.0) | 91.1 (90.2 - 92.0)          |
|                                      | 80-99    | 87.2 (79.0 - 95.4)     | 81.6 (77.3 - 85.9)   | 81.1 (74.5 - 87.7)    | 68.6 (58.4 - 78.7)    |                       | 84.6 (76.9 - 92.4)  | 78.3 (76.2 - 80.5)          |
| Stage IV                             | All ages | 65.9 (61.5 - 70.3)     | 56.4 (54.3 - 58.4)   | 63.6 (60.5 - 66.7)    | 57.8 (52.9 - 62.7)    |                       | 64.0 (60.8 - 67.2)  | 52.7 (51.5 - 54.0)          |
|                                      | 15-49    | 85.0 (77.7 - 92.3)     | 77.6 (72.6 - 82.5)   | 72.6 (60.6 - 84.6)    | 83.9 (71.9 - 95.9)    |                       | 77.9 (69.1 - 86.7)  | 67.9 (63.8 - 72.0)          |
|                                      | 50-64    | 77.0 (70.2 - 83.7)     | 67.5 (64.3 - 70.8)   | 72.9 (67.8 - 78.0)    | 68.4 (61.0 - 75.9)    |                       | 80.6 (75.6 - 85.6)  | 64.4 (62.2 - 66.6)          |
|                                      | 65-79    | 62.9 (55.6 - 70.1)     | 53.5 (50.1 - 56.9)   | 62.8 (58.6 - 66.9)    | 55.4 (47.6 - 63.2)    |                       | 63.3 (58.1 - 68.4)  | 49.4 (47.6 - 51.3)          |
|                                      | 80-99    | 40.7 (30.1 - 51.3)     | 31.8 (27.3 - 36.3)   | 37.9 (30.7 - 45.0)    | 28.7 (17.2 - 40.2)    |                       | 32.1 (24.7 - 39.5)  | 29.9 (27.4 - 32.5)          |
| <b>Mapped SEER stage<sup>4</sup></b> |          |                        |                      |                       |                       |                       |                     |                             |
| Localised                            | All ages | 96.7 (95.7 - 97.7)     | 95.9 (95.1 - 96.7)   | 96.6 (95.6 - 97.7)    | 95.8 (94.0 - 97.7)    | 99.2 (97.8 - 100.0)   | 98.0 (96.9 - 99.0)  | 96.0 (95.5 - 96.4)          |
|                                      | 15-49    | 100.0 (99.6 - 100.0)   | 99.9 (99.5 - 100.0)  | 99.1 (96.9 - 100.0)   | 98.4 (94.9 - 100.0)   | 100.0 (100.0 - 100.0) | 99.7 (98.2 - 100.0) | 99.0 (98.1 - 99.8)          |
|                                      | 50-64    | 98.7 (97.8 - 99.6)     | 98.5 (97.8 - 99.2)   | 98.4 (97.0 - 99.7)    | 97.5 (95.2 - 99.8)    | 99.9 (98.8 - 100.0)   | 99.8 (99.0 - 100.0) | 98.5 (98.0 - 99.0)          |
|                                      | 65-79    | 96.3 (94.9 - 97.7)     | 96.0 (94.8 - 97.2)   | 96.6 (95.1 - 98.1)    | 96.3 (93.7 - 98.9)    | 99.6 (97.7 - 100.0)   | 99.8 (99.0 - 100.0) | 96.3 (95.7 - 96.9)          |
|                                      | 80-99    | 91.6 (87.6 - 95.6)     | 88.3 (85.2 - 91.4)   | 90.9 (85.9 - 96.0)    | 90.1 (82.6 - 97.7)    | 96.4 (89.8 - 100.0)   | 98.8 (97.5 - 100.0) | 88.5 (86.7 - 90.4)          |
| Regional                             | All ages | 94.9 (93.9 - 96.0)     | 92.1 (91.2 - 92.9)   | 92.0 (90.5 - 93.4)    | 90.3 (88.0 - 92.6)    | 95.3 (93.5 - 97.1)    | 95.9 (94.1 - 97.8)  | 90.0 (89.4 - 90.6)          |
|                                      | 15-49    | 99.3 (98.2 - 100.0)    | 98.5 (97.5 - 99.5)   | 97.9 (94.6 - 100.0)   | 100.0 (100.0 - 100.0) | 97.9 (94.9 - 100.0)   | 99.0 (95.4 - 100.0) | 95.5 (94.2 - 96.8)          |
|                                      | 50-64    | 97.6 (96.4 - 98.7)     | 95.8 (94.9 - 96.7)   | 96.6 (94.8 - 98.4)    | 96.1 (93.9 - 98.2)    | 97.8 (95.8 - 99.8)    | 99.4 (98.0 - 100.0) | 95.8 (95.1 - 96.5)          |
|                                      | 65-79    | 94.3 (92.5 - 96.0)     | 92.6 (91.3 - 93.9)   | 92.2 (90.2 - 94.3)    | 91.5 (88.4 - 94.6)    | 96.1 (93.3 - 98.8)    | 97.5 (95.2 - 99.8)  | 89.8 (88.9 - 90.8)          |
|                                      | 80-99    | 88.8 (84.6 - 93.0)     | 80.6 (77.1 - 84.1)   | 77.7 (72.0 - 83.4)    | 69.4 (59.4 - 79.3)    | 86.5 (79.5 - 93.6)    | 84.3 (75.8 - 92.8)  | 75.8 (73.8 - 77.9)          |
| Distant                              | All ages | 62.3 (59.4 - 65.1)     | 57.2 (55.2 - 59.2)   | 63.4 (60.2 - 66.6)    | 57.8 (53.1 - 62.6)    | 53.4 (49.2 - 57.5)    | 64.0 (60.5 - 67.5)  | 52.3 (51.1 - 53.5)          |
|                                      | 15-49    | 82.4 (76.8 - 88.1)     | 78.5 (73.7 - 83.2)   | 71.9 (59.9 - 84.0)    | 84.4 (72.7 - 96.1)    | 75.7 (66.7 - 84.7)    | 78.2 (69.2 - 87.3)  | 67.3 (63.2 - 71.3)          |
|                                      | 50-64    | 74.9 (70.5 - 79.3)     | 68.9 (65.8 - 71.9)   | 73.1 (67.8 - 78.3)    | 67.7 (60.2 - 75.2)    | 70.0 (63.2 - 76.8)    | 80.3 (75.4 - 85.1)  | 63.9 (61.7 - 66.1)          |
|                                      | 65-79    | 58.0 (53.3 - 62.7)     | 54.4 (51.1 - 57.7)   | 62.7 (58.5 - 66.8)    | 55.5 (47.7 - 63.2)    | 43.9 (36.8 - 51.1)    | 62.9 (57.6 - 68.2)  | 49.2 (47.3 - 51.1)          |
|                                      | 80-99    | 36.8 (30.2 - 43.3)     | 32.0 (27.2 - 36.7)   | 37.7 (30.4 - 44.9)    | 29.0 (17.9 - 40.2)    | 33.2 (24.0 - 42.3)    | 33.2 (24.9 - 41.5)  | 29.5 (27.4 - 31.7)          |

Abbreviation: NS = net survival, CI = confidence interval

All ages=Age-standardised

<sup>1</sup> Australia includes Victoria (Data on both TNM and SEER) and New South Wales (Data on SEER only)

<sup>1</sup> Canada includes Alberta, British Columbia, New Brunswick, Manitoba, Newfoundland, Nova Scotia, Ontario, Prince Edward Island, and Saskatchewan; Ireland (2010-2013); United Kingdom includes England, Northern Ireland, Scotland, and Wales

<sup>3</sup> Model1: Age spline with mapped SEER stage as time-dependent covariate

<sup>4</sup> Model2: Age spline allowing separate models for each stage category

**Supplementary Table 3B.** Age-standardised and age-specific five-year net survival (%) by (imputed) stage at diagnosis and country for rectal cancer patients diagnosed during 2010-2014

| Stage                                |          | Australia <sup>1</sup> | Canada <sup>1</sup> | Denmark             | Ireland <sup>1</sup> | New Zealand         | Norway              | United Kingdom <sup>1</sup> |
|--------------------------------------|----------|------------------------|---------------------|---------------------|----------------------|---------------------|---------------------|-----------------------------|
|                                      |          | 5-year NS (95% CI)     | 5-year NS (95% CI)  | 5-year NS (95% CI)  | 5-year NS (95% CI)   | 5-year NS (95% CI)  | 5-year NS (95% CI)  | 5-year NS (95% CI)          |
| All patients <sup>2</sup>            | All ages | 70.8 (69.6 - 72.0)     | 70.9 (69.9 - 71.8)  | 69.1 (67.4 - 70.8)  | 61.6 (59.3 - 63.7)   | 65.4 (63.1 - 67.5)  | 68.8 (66.9 - 70.6)  | 62.1 (61.5 - 62.6)          |
|                                      | 15-49    | 77.9 (75.0 - 80.5)     | 78.2 (76.0 - 80.2)  | 73.1 (67.5 - 77.9)  | 73.1 (67.1 - 78.2)   | 71.8 (65.8 - 76.9)  | 75.7 (70.1 - 80.4)  | 68.9 (67.1 - 70.6)          |
|                                      | 50-64    | 75.4 (73.7 - 77.1)     | 76.5 (75.3 - 77.7)  | 74.8 (72.3 - 77.1)  | 66.0 (62.7 - 69.1)   | 71.0 (67.5 - 74.2)  | 73.0 (70.1 - 75.6)  | 70.1 (69.2 - 70.9)          |
|                                      | 65-79    | 70.5 (68.6 - 72.3)     | 71.7 (70.3 - 73.1)  | 68.3 (66.0 - 70.5)  | 63.1 (59.7 - 66.3)   | 65.1 (61.9 - 68.2)  | 71.8 (69.1 - 74.3)  | 63.4 (62.6 - 64.3)          |
|                                      | 80-99    | 58.2 (53.8 - 62.3)     | 55.2 (51.9 - 58.3)  | 56.7 (50.6 - 62.4)  | 41.4 (34.3 - 48.2)   | 51.7 (43.8 - 58.9)  | 51.2 (45.2 - 56.9)  | 39.3 (37.7 - 40.8)          |
| <b>TNM Stage<sup>3</sup></b>         |          |                        |                     |                     |                      |                     |                     |                             |
| Stage I                              | All ages | 95.1 (92.1 - 98.0)     | 91.0 (89.1 - 92.9)  | 93.5 (89.4 - 97.7)  | 89.4 (84.7 - 94.0)   |                     | 95.1 (92.0 - 98.3)  | 91.9 (90.9 - 93.0)          |
|                                      | 15-49    | 99.3 (96.8 - 100.0)    | 96.3 (93.2 - 99.4)  | 95.2 (87.7 - 100.0) | 95.1 (87.6 - 100.0)  |                     | 98.4 (94.1 - 100.0) | 94.1 (91.1 - 97.0)          |
|                                      | 50-64    | 94.3 (91.2 - 97.3)     | 95.8 (94.1 - 97.5)  | 96.8 (92.9 - 100.0) | 98.6 (94.6 - 100.0)  |                     | 97.7 (94.8 - 100.0) | 93.9 (92.7 - 95.2)          |
|                                      | 65-79    | 94.0 (90.1 - 97.8)     | 91.3 (88.6 - 93.9)  | 93.5 (89.1 - 98.0)  | 85.8 (79.0 - 92.6)   |                     | 95.6 (91.5 - 99.6)  | 93.5 (92.1 - 95.0)          |
|                                      | 80-99    | 96.8 (82.2 - 100.0)    | 78.1 (70.3 - 85.8)  | 85.0 (67.4 - 100.0) | 76.9 (57.8 - 95.9)   |                     | 86.9 (70.8 - 100.0) | 82.3 (77.6 - 87.0)          |
| Stage II                             | All ages | 85.4 (81.7 - 89.2)     | 77.8 (75.5 - 80.1)  | 83.7 (80.2 - 87.2)  | 74.5 (69.8 - 79.1)   |                     | 83.7 (79.7 - 87.6)  | 74.7 (72.9 - 76.5)          |
|                                      | 15-49    | 92.3 (85.2 - 99.5)     | 85.3 (80.3 - 90.3)  | 84.3 (74.5 - 94.0)  | 92.1 (82.6 - 100.0)  |                     | 93.4 (85.6 - 100.0) | 83.7 (79.7 - 87.8)          |
|                                      | 50-64    | 86.6 (81.8 - 91.4)     | 85.5 (82.7 - 88.3)  | 84.3 (80.7 - 87.8)  | 79.6 (72.7 - 86.6)   |                     | 86.8 (81.6 - 91.9)  | 82.9 (80.8 - 85.0)          |
|                                      | 65-79    | 85.9 (80.4 - 91.4)     | 79.6 (76.3 - 82.9)  | 83.3 (79.0 - 87.6)  | 74.2 (67.6 - 80.7)   |                     | 88.1 (82.9 - 93.3)  | 76.1 (73.7 - 78.6)          |
|                                      | 80-99    | 77.9 (63.4 - 92.5)     | 56.5 (49.4 - 63.5)  | 76.2 (63.3 - 89.1)  | 53.0 (37.0 - 69.0)   |                     | 64.5 (51.3 - 77.6)  | 48.9 (44.6 - 53.2)          |
| Stage III                            | All ages | 68.3 (64.3 - 72.3)     | 71.2 (69.3 - 73.0)  | 76.0 (73.2 - 78.7)  | 66.7 (63.0 - 70.4)   |                     | 76.6 (72.4 - 80.8)  | 64.2 (63.0 - 65.5)          |
|                                      | 15-49    | 79.1 (71.6 - 86.6)     | 83.7 (80.3 - 87.1)  | 79.4 (72.1 - 86.7)  | 83.3 (76.4 - 90.2)   |                     | 88.3 (79.3 - 97.3)  | 75.0 (72.2 - 77.9)          |
|                                      | 50-64    | 76.1 (70.8 - 81.4)     | 80.2 (77.9 - 82.4)  | 84.3 (80.7 - 87.8)  | 74.9 (70.4 - 79.4)   |                     | 82.0 (76.5 - 87.4)  | 75.3 (73.6 - 76.9)          |
|                                      | 65-79    | 66.4 (60.4 - 72.4)     | 72.2 (69.4 - 75.0)  | 75.6 (71.6 - 79.6)  | 68.4 (62.9 - 73.9)   |                     | 78.6 (73.0 - 84.2)  | 64.3 (62.3 - 66.3)          |
|                                      | 80-99    | 52.8 (40.0 - 65.6)     | 47.0 (40.5 - 53.6)  | 57.5 (44.9 - 70.1)  | 36.2 (24.3 - 48.2)   |                     | 54.4 (40.4 - 68.4)  | 35.5 (31.9 - 39.2)          |
| Stage IV                             | All ages | 19.0 (15.6 - 22.5)     | 12.9 (11.4 - 14.5)  | 22.9 (19.9 - 26.0)  | 11.4 (8.4 - 14.3)    |                     | 19.6 (16.7 - 22.5)  | 8.9 (8.1 - 9.7)             |
|                                      | 15-49    | 37.2 (26.2 - 48.2)     | 26.6 (20.6 - 32.6)  | 33.6 (21.4 - 45.7)  | 17.8 (6.5 - 29.2)    |                     | 37.8 (27.0 - 48.5)  | 17.5 (13.8 - 21.3)          |
|                                      | 50-64    | 24.5 (17.9 - 31.0)     | 17.8 (14.9 - 20.7)  | 28.7 (23.5 - 33.8)  | 14.0 (8.8 - 19.2)    |                     | 29.1 (23.7 - 34.5)  | 13.5 (11.7 - 15.4)          |
|                                      | 65-79    | 18.1 (12.3 - 23.9)     | 11.0 (8.6 - 13.3)   | 18.9 (14.8 - 23.0)  | 10.3 (5.9 - 14.7)    |                     | 16.7 (12.4 - 21.0)  | 6.8 (5.5 - 8.1)             |
|                                      | 80-99    | 2.2 (0.0 - 5.5)        | 2.5 (0.2 - 4.7)     | 7.7 (1.3 - 14.0)    | 3.9 (0.0 - 8.9)      |                     | 2.2 (0.0 - 4.8)     | 1.1 (0.5 - 1.8)             |
| <b>Mapped SEER stage<sup>4</sup></b> |          |                        |                     |                     |                      |                     |                     |                             |
| Localised                            | All ages | 89.8 (88.1 - 91.5)     | 89.2 (87.6 - 90.8)  | 92.6 (90.2 - 95.1)  | 83.6 (80.1 - 87.1)   | 92.6 (88.7 - 96.5)  | 91.1 (88.6 - 93.6)  | 85.2 (84.2 - 86.2)          |
|                                      | 15-49    | 97.3 (95.1 - 99.6)     | 94.7 (92.3 - 97.2)  | 95.3 (90.4 - 100.0) | 93.7 (87.7 - 99.8)   | 97.8 (92.5 - 100.0) | 96.7 (92.8 - 100.0) | 91.2 (88.3 - 94.0)          |
|                                      | 50-64    | 91.7 (89.8 - 93.6)     | 94.3 (92.8 - 95.8)  | 95.2 (92.6 - 97.7)  | 90.0 (85.5 - 94.6)   | 93.5 (89.3 - 97.7)  | 94.4 (91.6 - 97.2)  | 89.9 (88.8 - 91.1)          |
|                                      | 65-79    | 89.3 (86.9 - 91.8)     | 90.2 (87.9 - 92.4)  | 90.8 (87.6 - 94.0)  | 82.4 (77.4 - 87.4)   | 91.8 (86.5 - 97.2)  | 93.6 (90.2 - 96.9)  | 86.9 (85.6 - 88.2)          |
|                                      | 80-99    | 82.2 (74.7 - 89.8)     | 74.1 (68.0 - 80.2)  | 88.4 (77.3 - 99.5)  | 66.9 (54.1 - 79.7)   | 88.5 (73.3 - 100.0) | 75.8 (65.8 - 85.9)  | 67.4 (64.0 - 70.7)          |
| Regional                             | All ages | 73.0 (71.0 - 75.0)     | 71.5 (69.9 - 73.1)  | 73.2 (70.6 - 75.9)  | 66.2 (62.7 - 69.7)   | 74.4 (70.2 - 78.7)  | 75.6 (71.7 - 79.6)  | 62.1 (60.6 - 63.5)          |
|                                      | 15-49    | 83.5 (79.6 - 87.4)     | 82.9 (79.7 - 86.2)  | 77.3 (70.1 - 84.4)  | 84.2 (77.7 - 90.7)   | 85.7 (78.1 - 93.2)  | 87.5 (78.8 - 96.2)  | 73.5 (70.2 - 76.7)          |
|                                      | 50-64    | 79.6 (76.9 - 82.2)     | 80.6 (78.6 - 82.5)  | 82.1 (78.6 - 85.6)  | 74.8 (70.4 - 79.2)   | 81.2 (75.6 - 86.7)  | 81.0 (75.7 - 86.2)  | 73.4 (71.8 - 75.1)          |
|                                      | 65-79    | 71.1 (68.0 - 74.2)     | 72.3 (70.0 - 74.7)  | 73.4 (69.6 - 77.1)  | 66.9 (61.6 - 72.1)   | 72.9 (67.4 - 78.4)  | 78.1 (72.1 - 84.1)  | 62.1 (59.9 - 64.3)          |
|                                      | 80-99    | 57.8 (50.4 - 65.2)     | 48.3 (42.7 - 53.9)  | 52.9 (41.9 - 63.9)  | 36.1 (25.0 - 47.1)   | 55.4 (41.2 - 69.6)  | 53.2 (40.2 - 66.2)  | 32.5 (29.4 - 35.6)          |
| Distant                              | All ages | 17.9 (15.6 - 20.2)     | 14.4 (12.8 - 16.1)  | 22.6 (19.6 - 25.7)  | 11.0 (8.3 - 13.8)    | 10.0 (6.9 - 13.2)   | 19.2 (16.4 - 22.0)  | 8.8 (7.9 - 9.7)             |
|                                      | 15-49    | 32.0 (24.5 - 39.4)     | 29.1 (22.4 - 35.9)  | 32.7 (20.8 - 44.7)  | 17.0 (6.4 - 27.5)    | 23.5 (8.9 - 38.1)   | 37.1 (26.0 - 48.1)  | 17.0 (13.0 - 21.0)          |
|                                      | 50-64    | 24.5 (20.3 - 28.6)     | 19.7 (16.5 - 22.8)  | 28.5 (23.4 - 33.7)  | 13.6 (8.9 - 18.3)    | 16.8 (9.7 - 24.0)   | 28.5 (23.2 - 33.9)  | 13.4 (11.5 - 15.2)          |
|                                      | 65-79    | 15.2 (11.8 - 18.6)     | 12.7 (10.2 - 15.2)  | 18.9 (15.1 - 22.7)  | 9.8 (5.7 - 14.0)     | 6.4 (2.7 - 10.1)    | 16.0 (11.6 - 20.4)  | 6.9 (5.6 - 8.2)             |
|                                      | 80-99    | 3.9 (0.9 - 7.0)        | 2.9 (1.0 - 4.8)     | 7.2 (0.8 - 13.5)    | 3.9 (0.0 - 8.9)      | *                   | 2.5 (0.0 - 5.4)     | 1.1 (0.5 - 1.8)             |

Abbreviation: NS = net survival, CI = confidence interval

All ages=Age-standardised

<sup>1</sup>Australia includes Victoria (Data on both TNM and SEER) and New South Wales (Data on SEER only)

<sup>2</sup>Canada includes Alberta, British Columbia, New Brunswick, Manitoba, Newfoundland, Nova Scotia, Ontario, Prince Edward Island, and Saskatchewan; Ireland (2010-2013); United Kingdom includes England, Northern Ireland, Scotland, and Wales

<sup>3</sup> Model1: Age spline with mapped SEER stage as time-dependent covariate

<sup>4</sup> Model2: Age spline allowing separate models for each stage category



**Supplementary Table 4A.** Age-standardised and age-specific one-year net survival (%) by (imputed) stage at diagnosis and country for male colon cancer patients diagnosed during 2010-2014

| Stage                                |          | Australia <sup>†</sup> | Canada <sup>†</sup> | Denmark               | Ireland <sup>†</sup>  | New Zealand           | Norway               | United Kingdom <sup>†</sup> |
|--------------------------------------|----------|------------------------|---------------------|-----------------------|-----------------------|-----------------------|----------------------|-----------------------------|
|                                      |          | 1-year NS (95% CI)     | 1-year NS (95% CI)  | 1-year NS (95% CI)    | 1-year NS (95% CI)    | 1-year NS (95% CI)    | 1-year NS (95% CI)   | 1-year NS (95% CI)          |
| All patients <sup>‡</sup>            | All ages | 87.3 (86.6 - 88.0)     | 84.2 (83.7 - 84.7)  | 82.4 (81.2 - 83.6)    | 80.2 (78.7 - 81.6)    | 80.7 (79.3 - 82.1)    | 81.6 (80.3 - 82.7)   | 77.8 (77.4 - 78.2)          |
|                                      | 15-49    | 90.5 (88.2 - 92.3)     | 90.4 (88.7 - 91.8)  | 89.2 (84.1 - 92.7)    | 89.2 (84.1 - 92.7)    | 82.8 (76.9 - 87.3)    | 87.8 (83.1 - 91.3)   | 86.0 (84.7 - 87.2)          |
|                                      | 50-64    | 90.8 (89.5 - 91.9)     | 88.2 (87.3 - 89.0)  | 86.5 (84.3 - 88.5)    | 86.5 (84.3 - 88.5)    | 82.9 (79.9 - 85.4)    | 86.6 (84.3 - 88.6)   | 83.4 (82.7 - 84.1)          |
|                                      | 65-79    | 87.5 (86.5 - 88.5)     | 84.5 (83.6 - 85.2)  | 82.5 (80.9 - 83.9)    | 79.8 (77.6 - 81.8)    | 83.8 (81.9 - 85.5)    | 82.3 (80.5 - 83.9)   | 78.4 (77.8 - 78.9)          |
|                                      | 80-99    | 78.2 (76.1 - 80.1)     | 72.4 (70.9 - 73.9)  | 69.2 (65.8 - 72.4)    | 63.1 (58.7 - 67.1)    | 68.7 (65.1 - 72.1)    | 66.4 (63.2 - 69.4)   | 60.5 (59.6 - 61.5)          |
| <b>TNM Stage<sup>§</sup></b>         |          |                        |                     |                       |                       |                       |                      |                             |
| Stage I                              | All ages | 98.7 (97.5 - 99.9)     | 95.7 (95.0 - 96.5)  | 96.5 (94.7 - 98.3)    | 97.5 (95.4 - 99.6)    |                       | 96.2 (94.2 - 98.3)   | 97.7 (97.2 - 98.2)          |
|                                      | 15-49    | 98.3 (94.9 - 100.0)    | 97.9 (96.2 - 99.7)  | 100.0 (100.0 - 100.0) | 100.0 (100.0 - 100.0) |                       | 99.7 (97.4 - 100.0)  | 99.7 (98.9 - 100.0)         |
|                                      | 50-64    | 99.6 (98.4 - 100.0)    | 98.4 (97.6 - 99.3)  | 100.0 (98.4 - 100.0)  | 99.7 (97.7 - 100.0)   |                       | 99.8 (98.1 - 100.0)  | 99.6 (99.0 - 100.0)         |
|                                      | 65-79    | 98.7 (96.9 - 100.0)    | 96.1 (95.0 - 97.2)  | 96.4 (93.6 - 99.3)    | 98.1 (95.3 - 100.0)   |                       | 95.7 (92.5 - 99.0)   | 98.2 (97.4 - 99.0)          |
|                                      | 80-99    | 97.0 (91.9 - 100.0)    | 88.2 (85.1 - 91.3)  | 86.5 (77.3 - 95.6)    | 89.9 (80.1 - 99.7)    |                       | 88.7 (80.8 - 96.7)   | 91.7 (88.9 - 94.4)          |
| Stage II                             | All ages | 100.0 (98.9 - 100.0)   | 94.2 (93.5 - 95.0)  | 93.8 (92.2 - 95.5)    | 93.4 (91.5 - 95.2)    |                       | 96.2 (95.0 - 97.5)   | 94.0 (93.5 - 94.6)          |
|                                      | 15-49    | 99.3 (97.9 - 100.0)    | 98.1 (96.4 - 99.7)  | 100.0 (98.4 - 100.0)  | 97.2 (93.0 - 100.0)   |                       | 100.0 (98.6 - 100.0) | 99.0 (97.9 - 100.0)         |
|                                      | 50-64    | 96.5 (94.6 - 98.4)     | 97.7 (96.7 - 98.7)  | 95.5 (92.7 - 98.3)    | 97.6 (95.2 - 100.0)   |                       | 99.1 (97.5 - 100.0)  | 97.3 (96.6 - 98.1)          |
|                                      | 65-79    | 96.5 (94.6 - 98.4)     | 94.7 (93.6 - 95.9)  | 93.2 (91.1 - 95.4)    | 94.0 (91.3 - 96.8)    |                       | 96.9 (95.1 - 98.7)   | 94.4 (93.7 - 95.1)          |
|                                      | 80-99    | 95.2 (91.1 - 99.3)     | 84.9 (82.3 - 87.5)  | 87.3 (81.4 - 93.1)    | 81.1 (74.5 - 87.7)    |                       | 87.2 (82.2 - 92.3)   | 83.7 (81.9 - 85.5)          |
| Stage III                            | All ages | 92.3 (90.5 - 94.2)     | 90.0 (89.1 - 90.9)  | 91.3 (89.5 - 93.1)    | 88.7 (86.4 - 91.0)    |                       | 90.0 (88.1 - 92.0)   | 88.4 (87.8 - 89.1)          |
|                                      | 15-49    | 94.5 (90.2 - 98.9)     | 97.2 (95.4 - 99.0)  | 96.2 (90.9 - 100.0)   | 98.4 (95.0 - 100.0)   |                       | 97.9 (93.8 - 100.0)  | 95.3 (93.7 - 96.8)          |
|                                      | 50-64    | 97.1 (94.9 - 99.4)     | 94.0 (92.7 - 95.2)  | 95.7 (93.1 - 98.4)    | 95.6 (92.9 - 98.3)    |                       | 94.8 (92.0 - 97.7)   | 93.4 (92.5 - 94.4)          |
|                                      | 65-79    | 93.2 (90.5 - 95.9)     | 90.1 (88.7 - 91.5)  | 91.8 (89.2 - 94.5)    | 89.4 (86.1 - 92.6)    |                       | 90.3 (87.2 - 93.4)   | 89.2 (88.2 - 90.2)          |
|                                      | 80-99    | 80.4 (74.2 - 86.5)     | 78.1 (74.9 - 81.2)  | 77.0 (69.7 - 84.2)    | 65.8 (57.2 - 74.4)    |                       | 76.1 (69.7 - 82.4)   | 72.8 (70.9 - 74.7)          |
| Stage IV                             | All ages | 58.5 (55.3 - 61.7)     | 48.6 (47.1 - 50.2)  | 53.9 (51.0 - 56.9)    | 46.0 (42.5 - 49.5)    |                       | 51.9 (49.1 - 54.8)   | 42.0 (41.1 - 42.9)          |
|                                      | 15-49    | 67.8 (57.8 - 77.7)     | 67.4 (62.3 - 72.4)  | 67.7 (55.8 - 79.6)    | 65.2 (52.6 - 77.7)    |                       | 62.9 (52.1 - 73.7)   | 55.2 (51.5 - 58.8)          |
|                                      | 50-64    | 69.0 (63.0 - 74.9)     | 58.4 (55.6 - 61.2)  | 63.2 (57.9 - 68.6)    | 58.4 (51.8 - 65.0)    |                       | 63.1 (57.7 - 68.5)   | 51.7 (49.9 - 53.6)          |
|                                      | 65-79    | 59.7 (54.8 - 64.7)     | 45.9 (43.5 - 48.2)  | 52.0 (48.2 - 55.7)    | 41.9 (37.0 - 46.9)    |                       | 51.7 (47.6 - 55.7)   | 39.6 (38.3 - 40.8)          |
|                                      | 80-99    | 31.5 (25.1 - 37.9)     | 25.2 (22.2 - 28.2)  | 32.2 (25.5 - 38.9)    | 21.2 (14.5 - 27.8)    |                       | 24.7 (19.8 - 29.7)   | 20.5 (19.2 - 21.9)          |
| <b>Mapped SEER stage<sup>¶</sup></b> |          |                        |                     |                       |                       |                       |                      |                             |
| Localised                            | All ages | 98.1 (97.4 - 98.7)     | 96.0 (95.4 - 96.6)  | 96.2 (95.1 - 97.3)    | 96.2 (94.8 - 97.7)    | 98.0 (96.6 - 99.3)    | 96.3 (95.3 - 97.4)   | 96.1 (95.7 - 96.4)          |
|                                      | 15-49    | 99.0 (97.7 - 100.0)    | 98.5 (97.2 - 99.7)  | 99.6 (97.2 - 100.0)   | 98.7 (95.9 - 100.0)   | 100.0 (100.0 - 100.0) | 99.8 (98.3 - 100.0)  | 99.5 (98.9 - 100.0)         |
|                                      | 50-64    | 99.4 (98.7 - 100.0)    | 98.7 (98.1 - 99.4)  | 98.3 (96.6 - 100.0)   | 99.6 (98.3 - 100.0)   | 100.0 (99.8 - 100.0)  | 99.5 (98.4 - 100.0)  | 98.8 (98.3 - 99.2)          |
|                                      | 65-79    | 98.2 (97.2 - 99.1)     | 96.1 (95.2 - 97.0)  | 96.0 (94.4 - 97.5)    | 96.7 (94.6 - 98.7)    | 98.6 (96.8 - 100.0)   | 99.5 (98.4 - 100.0)  | 96.4 (95.9 - 97.0)          |
|                                      | 80-99    | 94.7 (92.1 - 97.3)     | 89.1 (86.9 - 91.3)  | 90.0 (85.4 - 94.5)    | 86.7 (80.4 - 93.1)    | 90.9 (84.6 - 97.1)    | 96.6 (95.0 - 98.3)   | 87.7 (86.3 - 89.2)          |
| Regional                             | All ages | 94.3 (93.4 - 95.1)     | 90.7 (90.0 - 91.5)  | 90.0 (88.2 - 91.7)    | 88.8 (86.8 - 90.7)    | 92.1 (90.6 - 93.7)    | 90.5 (88.7 - 92.4)   | 87.5 (86.9 - 88.1)          |
|                                      | 15-49    | 96.8 (94.8 - 98.8)     | 96.9 (95.3 - 98.5)  | 97.3 (93.5 - 100.0)   | 97.9 (94.9 - 100.0)   | 96.0 (91.6 - 100.0)   | 98.0 (94.3 - 100.0)  | 95.2 (93.7 - 96.6)          |
|                                      | 50-64    | 97.2 (96.0 - 98.3)     | 94.8 (93.7 - 95.8)  | 94.6 (91.9 - 97.2)    | 95.0 (92.3 - 97.6)    | 94.7 (92.0 - 97.4)    | 95.2 (92.6 - 97.8)   | 92.9 (92.0 - 93.8)          |
|                                      | 65-79    | 94.2 (93.0 - 95.5)     | 90.9 (89.7 - 92.0)  | 90.1 (87.7 - 92.5)    | 89.4 (86.4 - 92.3)    | 94.3 (92.4 - 96.2)    | 91.1 (88.3 - 93.8)   | 87.8 (86.9 - 88.7)          |
|                                      | 80-99    | 87.2 (84.2 - 90.3)     | 79.2 (76.7 - 81.8)  | 75.5 (69.1 - 82.0)    | 68.7 (61.6 - 75.8)    | 80.0 (75.0 - 85.0)    | 76.6 (70.6 - 82.6)   | 71.4 (69.5 - 73.2)          |
| Distant                              | All ages | 56.3 (54.2 - 58.3)     | 49.7 (48.2 - 51.2)  | 53.9 (50.9 - 56.8)    | 45.6 (42.2 - 49.1)    | 46.9 (43.6 - 50.2)    | 52.0 (49.2 - 54.9)   | 41.3 (40.4 - 42.2)          |
|                                      | 15-49    | 69.3 (63.0 - 75.6)     | 68.3 (63.3 - 73.2)  | 68.3 (56.6 - 79.9)    | 64.7 (52.1 - 77.3)    | 55.0 (43.4 - 66.5)    | 63.1 (52.3 - 73.8)   | 53.6 (50.0 - 57.2)          |
|                                      | 50-64    | 66.8 (62.9 - 70.7)     | 59.2 (56.5 - 61.9)  | 63.4 (57.9 - 68.9)    | 58.3 (51.7 - 64.9)    | 52.4 (45.8 - 59.0)    | 63.1 (57.7 - 68.4)   | 50.9 (49.1 - 52.7)          |
|                                      | 65-79    | 54.4 (51.2 - 57.6)     | 47.3 (44.9 - 49.7)  | 52.0 (48.2 - 55.8)    | 41.7 (36.8 - 46.6)    | 48.0 (43.3 - 52.7)    | 51.9 (47.8 - 56.0)   | 39.3 (38.1 - 40.5)          |
|                                      | 80-99    | 32.3 (28.0 - 36.7)     | 26.0 (23.0 - 29.0)  | 31.2 (24.8 - 37.7)    | 20.1 (13.7 - 26.5)    | 29.2 (23.1 - 35.4)    | 24.6 (19.7 - 29.5)   | 20.2 (18.7 - 21.6)          |

Abbreviation: NS = net survival, CI = confidence interval

All ages=Age-standardised

<sup>†</sup>Australia includes Victoria (Data on both TNM and SEER) and New South Wales (Data on SEER only)

<sup>‡</sup>Canada includes Alberta, British Columbia, New Brunswick, Manitoba, Newfoundland, Nova Scotia, Ontario, Prince Edward Island, and Saskatchewan; Ireland (2010-2013); United Kingdom includes England,

Northern Ireland, Scotland, and Wales

<sup>§</sup> Model1: Age spline with mapped SEER stage as time-dependent covariate

<sup>¶</sup> Model2: Age spline allowing separate models for each stage category

**Supplementary Table 4B.** Age-standardised and age-specific five-year net survival (%) by (imputed) stage at diagnosis and country for male colon cancer patients diagnosed during 2010-2014

| Stage                                |          | Australia <sup>†</sup> | Canada <sup>†</sup> | Denmark              | Ireland <sup>†</sup> | New Zealand          | Norway               | United Kingdom <sup>†</sup> |
|--------------------------------------|----------|------------------------|---------------------|----------------------|----------------------|----------------------|----------------------|-----------------------------|
|                                      |          | 5-year NS (95% CI)     | 5-year NS (95% CI)  | 5-year NS (95% CI)   | 5-year NS (95% CI)   | 5-year NS (95% CI)   | 5-year NS (95% CI)   | 5-year NS (95% CI)          |
| All patients <sup>‡</sup>            | All ages | 70.4 (69.3 - 71.4)     | 70.6 (69.8 - 71.3)  | 64.7 (62.8 - 66.5)   | 60.4 (58.5 - 62.2)   | 61.8 (59.9 - 63.6)   | 63.0 (61.3 - 64.7)   | 59.3 (58.8 - 59.8)          |
|                                      | 15-49    | 72.3 (69.1 - 75.3)     | 72.1 (69.7 - 74.4)  | 66.9 (60.1 - 72.9)   | 72.6 (66.6 - 77.8)   | 67.7 (60.9 - 73.6)   | 66.9 (60.6 - 72.5)   | 66.6 (64.8 - 68.3)          |
|                                      | 50-64    | 72.4 (70.6 - 74.1)     | 72.4 (71.2 - 73.6)  | 65.7 (62.6 - 68.6)   | 64.6 (61.3 - 67.6)   | 62.7 (59.2 - 66.0)   | 67.1 (64.0 - 70.0)   | 63.3 (62.4 - 64.2)          |
|                                      | 65-79    | 71.1 (69.6 - 72.6)     | 71.0 (69.9 - 72.1)  | 64.5 (62.1 - 66.7)   | 59.9 (57.2 - 62.5)   | 63.4 (60.8 - 65.9)   | 62.4 (59.9 - 64.8)   | 60.9 (60.2 - 61.6)          |
|                                      | 80-99    | 63.6 (60.1 - 66.9)     | 65.4 (62.9 - 67.9)  | 62.1 (55.3 - 68.1)   | 44.7 (38.8 - 50.4)   | 52.6 (47.1 - 57.8)   | 53.6 (48.5 - 58.3)   | 42.9 (41.5 - 44.2)          |
| <b>TNM Stage<sup>§</sup></b>         |          |                        |                     |                      |                      |                      |                      |                             |
| Stage I                              | All ages | 95.7 (92.9 - 98.5)     | 93.4 (91.8 - 94.9)  | 92.4 (87.6 - 97.3)   | 93.4 (89.1 - 97.7)   |                      | 92.1 (88.1 - 96.1)   | 95.1 (93.9 - 96.4)          |
|                                      | 15-49    | 95.1 (88.7 - 100.0)    | 92.8 (88.9 - 96.6)  | 100.0 (96.3 - 100.0) | 93.1 (82.1 - 100.0)  |                      | 100.0 (98.0 - 100.0) | 95.2 (92.2 - 98.1)          |
|                                      | 50-64    | 96.0 (92.8 - 99.3)     | 95.0 (93.2 - 96.9)  | 91.4 (85.1 - 97.7)   | 98.8 (94.6 - 100.0)  |                      | 97.6 (93.1 - 100.0)  | 95.7 (94.0 - 97.3)          |
|                                      | 65-79    | 96.5 (92.9 - 100.0)    | 94.1 (91.8 - 96.4)  | 91.7 (85.5 - 98.0)   | 94.3 (88.6 - 100.0)  |                      | 87.3 (81.2 - 93.3)   | 96.8 (95.2 - 98.3)          |
|                                      | 80-99    | 93.1 (80.9 - 100.0)    | 88.7 (82.1 - 95.2)  | 92.4 (70.2 - 100.0)  | 82.3 (63.7 - 100.0)  |                      | 89.3 (72.7 - 100.0)  | 91.0 (83.0 - 99.0)          |
| Stage II                             | All ages | 89.7 (87.2 - 92.2)     | 86.8 (85.3 - 88.3)  | 90.1 (87.2 - 93.0)   | 85.3 (82.2 - 88.3)   |                      | 90.3 (87.7 - 92.8)   | 85.9 (84.9 - 86.8)          |
|                                      | 15-49    | 96.1 (91.0 - 100.0)    | 92.0 (88.6 - 95.4)  | 92.7 (84.8 - 100.0)  | 93.0 (86.7 - 99.4)   |                      | 94.9 (89.2 - 100.0)  | 89.6 (86.7 - 92.5)          |
|                                      | 50-64    | 91.5 (87.8 - 95.3)     | 89.5 (87.4 - 91.6)  | 78.5 (73.5 - 83.6)   | 90.0 (85.7 - 94.2)   |                      | 94.6 (91.3 - 97.9)   | 88.4 (86.8 - 89.9)          |
|                                      | 65-79    | 87.6 (84.0 - 91.2)     | 85.1 (82.8 - 87.4)  | 86.8 (82.9 - 90.6)   | 85.3 (80.8 - 89.8)   |                      | 90.6 (87.0 - 94.2)   | 87.0 (85.8 - 88.3)          |
|                                      | 80-99    | 86.7 (77.0 - 96.4)     | 82.6 (77.5 - 87.7)  | 96.9 (83.9 - 100.0)  | 70.5 (58.3 - 82.7)   |                      | 77.8 (68.3 - 87.4)   | 76.1 (72.5 - 79.8)          |
| Stage III                            | All ages | 68.0 (64.8 - 71.2)     | 70.0 (68.2 - 71.8)  | 74.6 (71.1 - 78.0)   | 65.0 (61.6 - 68.3)   |                      | 68.9 (65.5 - 72.3)   | 63.4 (62.1 - 64.8)          |
|                                      | 15-49    | 77.4 (69.1 - 85.8)     | 78.1 (73.8 - 82.4)  | 80.1 (70.1 - 90.0)   | 81.7 (73.1 - 90.3)   |                      | 75.6 (64.2 - 87.1)   | 74.8 (71.2 - 78.4)          |
|                                      | 50-64    | 75.9 (70.9 - 80.9)     | 77.5 (75.3 - 79.8)  | 78.5 (73.5 - 83.6)   | 75.1 (70.1 - 80.1)   |                      | 74.4 (68.8 - 79.9)   | 71.2 (69.6 - 72.8)          |
|                                      | 65-79    | 67.3 (62.5 - 72.0)     | 69.5 (66.6 - 72.4)  | 76.5 (71.8 - 81.2)   | 64.3 (59.3 - 69.3)   |                      | 68.4 (63.4 - 73.3)   | 64.3 (62.5 - 66.1)          |
|                                      | 80-99    | 50.4 (40.3 - 60.4)     | 52.7 (47.5 - 57.9)  | 57.1 (44.4 - 69.8)   | 33.7 (24.0 - 43.5)   |                      | 54.8 (44.7 - 64.9)   | 39.0 (35.7 - 42.3)          |
| Stage IV                             | All ages | 15.7 (13.1 - 18.2)     | 11.7 (10.7 - 12.8)  | 15.8 (13.5 - 18.1)   | 9.8 (7.9 - 11.7)     |                      | 15.0 (12.8 - 17.2)   | 8.2 (7.4 - 9.0)             |
|                                      | 15-49    | 28.3 (19.1 - 37.4)     | 20.7 (16.2 - 25.2)  | 17.8 (8.4 - 27.1)    | 27.0 (15.5 - 38.4)   |                      | 21.7 (12.8 - 30.7)   | 16.1 (12.2 - 20.0)          |
|                                      | 50-64    | 16.5 (11.9 - 21.2)     | 16.0 (14.0 - 18.0)  | 21.4 (16.9 - 25.8)   | 11.8 (7.9 - 15.7)    |                      | 21.7 (17.0 - 26.5)   | 11.1 (9.9 - 12.4)           |
|                                      | 65-79    | 15.5 (11.5 - 19.5)     | 10.2 (8.6 - 11.9)   | 13.7 (10.8 - 16.6)   | 7.5 (5.1 - 10.0)     |                      | 10.9 (8.2 - 13.6)    | 6.7 (5.9 - 7.5)             |
|                                      | 80-99    | 5.9 (1.7 - 10.1)       | 2.3 (1.0 - 3.6)     | 9.7 (4.3 - 15.1)     | 1.7 (0.0 - 4.2)      |                      | 8.3 (4.1 - 12.5)     | 1.5 (0.9 - 2.1)             |
| <b>Mapped SEER stage<sup>¶</sup></b> |          |                        |                     |                      |                      |                      |                      |                             |
| Localised                            | All ages | 94.5 (93.1 - 95.9)     | 92.7 (91.5 - 93.8)  | 94.1 (91.6 - 96.6)   | 91.7 (89.0 - 94.4)   | 93.9 (91.0 - 96.8)   | 91.6 (89.4 - 93.8)   | 90.9 (90.1 - 91.7)          |
|                                      | 15-49    | 95.2 (92.4 - 98.1)     | 93.4 (90.4 - 96.4)  | 95.7 (90.0 - 100.0)  | 97.1 (92.6 - 100.0)  | 100.0 (97.0 - 100.0) | 97.9 (94.1 - 100.0)  | 93.1 (91.4 - 94.8)          |
|                                      | 50-64    | 96.3 (94.6 - 97.9)     | 94.5 (93.1 - 95.9)  | 93.7 (90.1 - 97.2)   | 96.8 (93.8 - 99.8)   | 95.0 (91.2 - 98.7)   | 96.2 (93.5 - 98.8)   | 92.4 (91.2 - 93.5)          |
|                                      | 65-79    | 94.5 (92.6 - 96.5)     | 92.1 (90.3 - 93.8)  | 91.8 (88.5 - 95.2)   | 91.9 (88.3 - 95.5)   | 93.7 (89.7 - 97.7)   | 90.0 (86.8 - 93.1)   | 92.1 (91.0 - 93.2)          |
|                                      | 80-99    | 90.7 (84.8 - 96.5)     | 90.3 (85.4 - 95.2)  | 100.0 (88.3 - 100.0) | 77.2 (65.8 - 88.6)   | 87.7 (75.5 - 99.9)   | 82.0 (73.2 - 90.7)   | 84.1 (80.9 - 87.4)          |
| Regional                             | All ages | 77.3 (75.6 - 78.9)     | 74.2 (72.9 - 75.5)  | 73.9 (70.8 - 77.0)   | 66.2 (63.2 - 69.2)   | 73.6 (70.8 - 76.3)   | 70.3 (67.1 - 73.6)   | 63.0 (61.8 - 64.1)          |
|                                      | 15-49    | 86.4 (82.5 - 90.4)     | 81.8 (78.3 - 85.2)  | 83.0 (74.4 - 91.5)   | 82.7 (75.5 - 89.9)   | 84.6 (77.0 - 92.2)   | 77.1 (66.9 - 87.3)   | 74.3 (71.2 - 77.4)          |
|                                      | 50-64    | 80.7 (78.2 - 83.3)     | 80.2 (78.3 - 82.1)  | 77.5 (72.8 - 82.3)   | 74.8 (70.2 - 79.3)   | 76.4 (71.4 - 81.4)   | 75.9 (70.7 - 81.1)   | 70.7 (68.8 - 72.5)          |
|                                      | 65-79    | 76.0 (73.6 - 78.3)     | 73.1 (71.1 - 75.1)  | 74.3 (70.1 - 78.4)   | 64.7 (60.4 - 69.1)   | 73.8 (70.1 - 77.5)   | 70.4 (65.8 - 74.9)   | 63.4 (62.0 - 64.9)          |
|                                      | 80-99    | 68.5 (62.8 - 74.3)     | 61.3 (57.2 - 65.4)  | 59.6 (47.6 - 71.5)   | 40.4 (30.6 - 50.2)   | 60.1 (51.5 - 68.6)   | 56.0 (46.0 - 65.9)   | 39.4 (36.1 - 42.6)          |
| Distant                              | All ages | 16.4 (14.7 - 18.0)     | 13.4 (12.3 - 14.6)  | 15.7 (13.3 - 18.2)   | 9.8 (7.8 - 11.7)     | 12.1 (9.9 - 14.4)    | 15.0 (12.8 - 17.3)   | 7.8 (7.1 - 8.4)             |
|                                      | 15-49    | 24.8 (19.0 - 30.5)     | 22.2 (17.7 - 26.8)  | 17.7 (7.9 - 27.4)    | 25.5 (14.6 - 36.4)   | 21.0 (10.1 - 31.8)   | 21.8 (12.6 - 30.9)   | 13.9 (10.6 - 17.2)          |
|                                      | 50-64    | 20.3 (17.0 - 23.5)     | 18.1 (16.0 - 20.1)  | 21.3 (16.8 - 25.7)   | 11.9 (8.0 - 15.8)    | 15.3 (10.6 - 20.1)   | 21.5 (16.8 - 26.1)   | 10.8 (9.4 - 12.1)           |
|                                      | 65-79    | 14.9 (12.5 - 17.2)     | 12.0 (10.2 - 13.7)  | 13.8 (10.8 - 16.7)   | 7.6 (5.2 - 10.1)     | 9.9 (7.0 - 12.9)     | 11.1 (8.3 - 13.9)    | 6.5 (5.7 - 7.4)             |
|                                      | 80-99    | 7.2 (4.2 - 10.1)       | 3.2 (1.8 - 4.6)     | 9.3 (4.1 - 14.5)     | 1.7 (0.0 - 4.4)      | 6.2 (1.3 - 11.0)     | 8.0 (3.9 - 12.2)     | 1.3 (0.8 - 1.9)             |

Abbreviation: NS = net survival, CI = confidence interval

All ages=Age-standardised

<sup>†</sup>Australia includes Victoria (Data on both TNM and SEER) and New South Wales (Data on SEER only)

<sup>‡</sup>Canada includes Alberta, British Columbia, New Brunswick, Manitoba, Newfoundland, Nova Scotia, Ontario, Prince Edward Island, and Saskatchewan; Ireland (2010-2013); United Kingdom includes England, Northern Ireland, Scotland, and Wales

<sup>§</sup> Model1: Age spline with mapped SEER stage as time-dependent covariate

<sup>¶</sup> Model2: Age spline allowing separate models for each stage category

**Supplementary Table 5A.** Age-standardised and age-specific one-year net survival (%) by (imputed) stage at diagnosis and country for female colon cancer patients diagnosed during 2010-2014

| Stage                                | Australia <sup>1</sup> |                       | Canada <sup>1</sup> |                     | Denmark               |                       | Ireland <sup>1</sup>  |                     | New Zealand        |                    | Norway             |                    | United Kingdom <sup>1</sup> |                    |
|--------------------------------------|------------------------|-----------------------|---------------------|---------------------|-----------------------|-----------------------|-----------------------|---------------------|--------------------|--------------------|--------------------|--------------------|-----------------------------|--------------------|
|                                      |                        | 1-year NS (95% CI)    | 1-year NS (95% CI)  | 1-year NS (95% CI)  | 1-year NS (95% CI)    | 1-year NS (95% CI)    | 1-year NS (95% CI)    | 1-year NS (95% CI)  | 1-year NS (95% CI) | 1-year NS (95% CI) | 1-year NS (95% CI) | 1-year NS (95% CI) | 1-year NS (95% CI)          | 1-year NS (95% CI) |
| All patients <sup>2</sup>            | All ages               | 87.7 (87.1 - 88.4)    | 84.3 (83.8 - 84.9)  | 82.9 (81.7 - 83.9)  | 79.8 (78.1 - 81.3)    | 80.9 (79.5 - 82.2)    | 83.5 (82.4 - 84.6)    | 76.3 (75.9 - 76.7)  |                    |                    |                    |                    |                             |                    |
|                                      | 15-49                  | 93.4 (91.5 - 94.8)    | 92.3 (90.8 - 93.5)  | 90.1 (85.4 - 93.3)  | 90.1 (85.4 - 93.3)    | 86.4 (81.7 - 90.0)    | 90.5 (86.6 - 93.3)    | 87.3 (86.0 - 88.4)  |                    |                    |                    |                    |                             |                    |
|                                      | 50-64                  | 92.1 (90.9 - 93.2)    | 89.8 (88.8 - 90.6)  | 87.7 (85.5 - 89.6)  | 87.7 (85.5 - 89.6)    | 85.6 (82.7 - 88.1)    | 88.1 (85.8 - 90.1)    | 84.2 (83.4 - 85.0)  |                    |                    |                    |                    |                             |                    |
|                                      | 65-79                  | 88.1 (87.0 - 89.1)    | 84.3 (83.4 - 85.2)  | 82.6 (81.0 - 84.1)  | 81.2 (78.6 - 83.5)    | 81.7 (79.7 - 83.6)    | 84.1 (82.3 - 85.6)    | 76.9 (76.3 - 77.5)  |                    |                    |                    |                    |                             |                    |
|                                      | 80-99                  | 75.8 (74.0 - 77.5)    | 70.5 (69.2 - 71.8)  | 69.6 (66.7 - 72.2)  | 57.7 (53.5 - 61.6)    | 67.2 (64.1 - 70.1)    | 70.8 (68.1 - 73.2)    | 55.2 (54.4 - 56.1)  |                    |                    |                    |                    |                             |                    |
| <b>TNM Stage<sup>3</sup></b>         |                        |                       |                     |                     |                       |                       |                       |                     |                    |                    |                    |                    |                             |                    |
| Stage I                              | All ages               | 99.6 (98.5 - 100.0)   | 96.3 (95.5 - 97.0)  | 97.6 (95.8 - 99.4)  | 97.3 (94.8 - 99.7)    |                       | 98.2 (96.7 - 99.6)    | 98.0 (97.4 - 98.6)  |                    |                    |                    |                    |                             |                    |
|                                      | 15-49                  | 100.0 (100.0 - 100.0) | 99.4 (98.6 - 100.0) | 97.0 (91.1 - 100.0) | 100.0 (100.0 - 100.0) |                       | 99.9 (98.5 - 100.0)   | 99.7 (99.0 - 100.0) |                    |                    |                    |                    |                             |                    |
|                                      | 50-64                  | 99.7 (98.6 - 100.0)   | 99.1 (98.3 - 99.8)  | 98.1 (95.3 - 100.0) | 99.0 (96.2 - 100.0)   |                       | 99.4 (97.2 - 100.0)   | 99.2 (98.5 - 99.8)  |                    |                    |                    |                    |                             |                    |
|                                      | 65-79                  | 99.3 (97.8 - 100.0)   | 97.3 (96.3 - 98.4)  | 98.6 (96.5 - 100.0) | 98.7 (96.0 - 100.0)   |                       | 99.0 (97.0 - 100.0)   | 99.2 (98.5 - 99.9)  |                    |                    |                    |                    |                             |                    |
|                                      | 80-99                  | 100.0 (95.8 - 100.0)  | 87.7 (84.8 - 90.6)  | 94.3 (87.0 - 100.0) | 88.5 (77.7 - 99.4)    |                       | 94.3 (89.0 - 99.6)    | 92.0 (89.6 - 94.5)  |                    |                    |                    |                    |                             |                    |
| Stage II                             | All ages               | 100.0 (100.0 - 100.0) | 94.2 (93.5 - 95.0)  | 94.0 (92.7 - 95.3)  | 92.5 (90.6 - 94.3)    |                       | 96.4 (95.3 - 97.5)    | 93.0 (92.4 - 93.6)  |                    |                    |                    |                    |                             |                    |
|                                      | 15-49                  | 99.8 (98.7 - 100.0)   | 98.4 (96.8 - 99.9)  | 96.9 (90.9 - 100.0) | 100.0 (100.0 - 100.0) |                       | 100.0 (100.0 - 100.0) | 98.0 (96.8 - 99.2)  |                    |                    |                    |                    |                             |                    |
|                                      | 50-64                  | 97.7 (96.0 - 99.5)    | 96.9 (95.8 - 98.1)  | 96.8 (94.6 - 98.9)  | 99.1 (97.3 - 100.0)   |                       | 99.6 (98.6 - 100.0)   | 97.4 (96.6 - 98.1)  |                    |                    |                    |                    |                             |                    |
|                                      | 65-79                  | 97.7 (96.0 - 99.5)    | 95.1 (93.9 - 96.2)  | 94.7 (92.8 - 96.5)  | 91.3 (88.0 - 94.5)    |                       | 95.8 (94.0 - 97.5)    | 94.2 (93.4 - 95.0)  |                    |                    |                    |                    |                             |                    |
|                                      | 80-99                  | 90.5 (86.5 - 94.4)    | 85.9 (83.7 - 88.2)  | 85.2 (81.0 - 89.4)  | 77.3 (70.2 - 84.3)    |                       | 91.3 (87.8 - 94.8)    | 80.1 (78.0 - 82.2)  |                    |                    |                    |                    |                             |                    |
| Stage III                            | All ages               | 92.9 (91.3 - 94.4)    | 89.4 (88.5 - 90.4)  | 89.8 (88.0 - 91.6)  | 87.2 (84.7 - 89.7)    |                       | 92.3 (90.6 - 94.0)    | 85.8 (85.1 - 86.5)  |                    |                    |                    |                    |                             |                    |
|                                      | 15-49                  | 97.5 (94.6 - 100.0)   | 98.2 (96.8 - 99.6)  | 95.6 (90.9 - 100.0) | 95.9 (91.9 - 99.9)    |                       | 100.0 (100.0 - 100.0) | 96.7 (95.5 - 97.9)  |                    |                    |                    |                    |                             |                    |
|                                      | 50-64                  | 98.1 (96.4 - 99.8)    | 95.8 (94.6 - 96.9)  | 94.1 (91.1 - 97.0)  | 95.1 (91.8 - 98.5)    |                       | 96.8 (94.4 - 99.2)    | 94.1 (93.0 - 95.1)  |                    |                    |                    |                    |                             |                    |
|                                      | 65-79                  | 91.8 (89.0 - 94.6)    | 89.7 (88.1 - 91.2)  | 91.5 (88.8 - 94.1)  | 90.0 (86.1 - 93.8)    |                       | 93.5 (91.0 - 96.0)    | 86.1 (84.9 - 87.3)  |                    |                    |                    |                    |                             |                    |
|                                      | 80-99                  | 81.5 (76.3 - 86.7)    | 73.1 (70.4 - 75.9)  | 73.6 (67.5 - 79.8)  | 63.1 (55.3 - 71.0)    |                       | 78.3 (72.8 - 83.7)    | 64.4 (62.4 - 66.3)  |                    |                    |                    |                    |                             |                    |
| Stage IV                             | All ages               | 57.7 (54.3 - 61.1)    | 48.6 (47.0 - 50.2)  | 54.0 (51.1 - 56.9)  | 44.5 (40.4 - 48.6)    |                       | 51.3 (48.4 - 54.1)    | 40.4 (39.4 - 41.4)  |                    |                    |                    |                    |                             |                    |
|                                      | 15-49                  | 78.9 (70.9 - 86.9)    | 71.0 (66.2 - 75.7)  | 75.2 (64.5 - 85.8)  | 71.1 (57.7 - 84.5)    |                       | 69.1 (59.7 - 78.5)    | 61.6 (58.3 - 64.8)  |                    |                    |                    |                    |                             |                    |
|                                      | 50-64                  | 70.9 (64.9 - 77.0)    | 63.2 (60.3 - 66.2)  | 68.0 (62.6 - 73.4)  | 55.7 (47.7 - 63.7)    |                       | 64.3 (58.6 - 70.1)    | 53.1 (51.1 - 55.2)  |                    |                    |                    |                    |                             |                    |
|                                      | 65-79                  | 52.7 (46.9 - 58.5)    | 43.6 (41.0 - 46.2)  | 48.1 (43.9 - 52.4)  | 42.7 (36.3 - 49.1)    |                       | 47.5 (43.0 - 52.0)    | 35.3 (33.9 - 36.7)  |                    |                    |                    |                    |                             |                    |
|                                      | 80-99                  | 32.0 (25.7 - 38.3)    | 20.1 (17.6 - 22.5)  | 29.2 (23.8 - 34.5)  | 16.2 (10.3 - 22.0)    |                       | 24.6 (20.3 - 29.0)    | 16.4 (15.3 - 17.5)  |                    |                    |                    |                    |                             |                    |
| <b>Mapped SEER stage<sup>4</sup></b> |                        |                       |                     |                     |                       |                       |                       |                     |                    |                    |                    |                    |                             |                    |
| Localised                            | All ages               | 98.2 (97.6 - 98.8)    | 96.1 (95.5 - 96.6)  | 97.6 (96.6 - 98.6)  | 96.5 (95.1 - 97.9)    | 98.6 (97.4 - 99.7)    | 97.5 (96.6 - 98.4)    | 96.0 (95.7 - 96.4)  |                    |                    |                    |                    |                             |                    |
|                                      | 15-49                  | 100.0 (99.8 - 100.0)  | 99.2 (98.4 - 100.0) | 98.0 (94.2 - 100.0) | 100.0 (100.0 - 100.0) | 100.0 (100.0 - 100.0) | 99.9 (99.0 - 100.0)   | 99.1 (98.5 - 99.7)  |                    |                    |                    |                    |                             |                    |
|                                      | 50-64                  | 99.6 (99.0 - 100.0)   | 98.3 (97.6 - 99.0)  | 98.7 (97.2 - 100.0) | 99.7 (98.4 - 100.0)   | 99.0 (97.0 - 100.0)   | 99.7 (98.5 - 100.0)   | 98.6 (98.1 - 99.1)  |                    |                    |                    |                    |                             |                    |
|                                      | 65-79                  | 99.0 (98.2 - 99.8)    | 97.2 (96.3 - 98.1)  | 97.7 (96.2 - 99.2)  | 96.8 (94.6 - 99.0)    | 99.4 (97.9 - 100.0)   | 99.7 (98.5 - 100.0)   | 97.4 (96.8 - 98.0)  |                    |                    |                    |                    |                             |                    |
|                                      | 80-99                  | 92.8 (90.5 - 95.2)    | 88.2 (86.3 - 90.1)  | 94.8 (91.4 - 98.2)  | 87.4 (81.9 - 93.0)    | 94.4 (89.7 - 99.0)    | 97.6 (96.2 - 99.0)    | 86.9 (85.4 - 88.4)  |                    |                    |                    |                    |                             |                    |
| Regional                             | All ages               | 94.0 (93.2 - 94.8)    | 90.7 (89.9 - 91.4)  | 87.4 (85.7 - 89.0)  | 86.2 (84.0 - 88.5)    | 92.8 (91.5 - 94.1)    | 91.9 (90.4 - 93.4)    | 84.7 (84.1 - 85.3)  |                    |                    |                    |                    |                             |                    |
|                                      | 15-49                  | 97.9 (96.4 - 99.5)    | 97.9 (96.6 - 99.2)  | 94.8 (89.9 - 99.6)  | 96.5 (93.1 - 100.0)   | 97.5 (94.5 - 100.0)   | 99.8 (98.1 - 100.0)   | 96.4 (95.0 - 97.7)  |                    |                    |                    |                    |                             |                    |
|                                      | 50-64                  | 98.1 (97.1 - 99.1)    | 96.1 (95.2 - 97.1)  | 92.2 (89.2 - 95.2)  | 95.1 (92.0 - 98.2)    | 97.6 (95.8 - 99.5)    | 97.2 (95.1 - 99.2)    | 93.7 (92.7 - 94.7)  |                    |                    |                    |                    |                             |                    |
|                                      | 65-79                  | 94.1 (92.8 - 95.3)    | 90.9 (89.7 - 92.1)  | 89.6 (87.0 - 92.2)  | 87.5 (84.0 - 91.0)    | 92.5 (90.5 - 94.6)    | 92.4 (90.0 - 94.8)    | 84.9 (83.9 - 85.9)  |                    |                    |                    |                    |                             |                    |
|                                      | 80-99                  | 84.0 (81.3 - 86.6)    | 76.7 (74.6 - 78.8)  | 68.3 (63.3 - 73.2)  | 61.4 (54.8 - 68.0)    | 81.6 (77.7 - 85.5)    | 78.2 (73.5 - 82.9)    | 61.9 (60.4 - 63.5)  |                    |                    |                    |                    |                             |                    |
| Distant                              | All ages               | 56.7 (54.5 - 58.8)    | 50.4 (48.9 - 52.0)  | 54.5 (51.7 - 57.4)  | 44.6 (40.4 - 48.9)    | 46.2 (43.0 - 49.4)    | 51.5 (48.6 - 54.3)    | 39.8 (38.9 - 40.8)  |                    |                    |                    |                    |                             |                    |
|                                      | 15-49                  | 76.7 (71.2 - 82.2)    | 71.8 (67.1 - 76.5)  | 75.2 (64.7 - 85.7)  | 71.6 (57.9 - 85.4)    | 65.2 (55.7 - 74.7)    | 69.0 (59.6 - 78.5)    | 59.4 (55.9 - 63.0)  |                    |                    |                    |                    |                             |                    |
|                                      | 50-64                  | 71.9 (68.0 - 75.7)    | 64.9 (62.0 - 67.7)  | 68.5 (63.0 - 74.0)  | 55.7 (47.8 - 63.7)    | 58.5 (51.8 - 65.2)    | 64.4 (58.7 - 70.1)    | 52.6 (50.6 - 54.7)  |                    |                    |                    |                    |                             |                    |
|                                      | 65-79                  | 51.9 (48.4 - 55.5)    | 45.7 (43.2 - 48.3)  | 48.8 (44.6 - 53.1)  | 42.9 (36.4 - 49.4)    | 42.0 (37.2 - 46.9)    | 47.8 (43.3 - 52.2)    | 34.9 (33.5 - 36.4)  |                    |                    |                    |                    |                             |                    |
|                                      | 80-99                  | 27.9 (24.1 - 31.7)    | 22.6 (20.1 - 25.2)  | 29.1 (23.9 - 34.3)  | 16.0 (10.2 - 21.8)    | 22.5 (17.7 - 27.3)    | 25.0 (20.5 - 29.5)    | 16.1 (14.7 - 17.5)  |                    |                    |                    |                    |                             |                    |

Abbreviation: NS = net survival, CI = confidence interval

All ages=Age-standardised

<sup>1</sup>Australia includes Victoria (Data on both TNM and SEER) and New South Wales (Data on SEER only)

<sup>2</sup>Canada includes Alberta, British Columbia, New Brunswick, Manitoba, Newfoundland, Nova Scotia, Ontario, Prince Edward Island, and Saskatchewan; Ireland (2010-2013); United Kingdom includes England, Northern Ireland, Scotland, and Wales

<sup>3</sup> Model1: Age spline with mapped SEER stage as time-dependent covariate

<sup>4</sup> Model2: Age spline allowing separate models for each stage category

**Supplementary Table 5B.** Age-standardised and age-specific five-year net survival (%) by (imputed) stage at diagnosis and country for female colon cancer patients diagnosed during 2010-2014

| Stage                                |          | Australia <sup>1</sup> | Canada <sup>1</sup> | Denmark               | Ireland <sup>1</sup> | New Zealand         | Norway               | United Kingdom <sup>1</sup> |
|--------------------------------------|----------|------------------------|---------------------|-----------------------|----------------------|---------------------|----------------------|-----------------------------|
|                                      |          | 5-year NS (95% CI)     | 5-year NS (95% CI)  | 5-year NS (95% CI)    | 5-year NS (95% CI)   | 5-year NS (95% CI)  | 5-year NS (95% CI)   | 5-year NS (95% CI)          |
| All patients <sup>2</sup>            | All ages | 71.6 (70.5 - 72.6)     | 71.0 (70.2 - 71.7)  | 66.2 (64.5 - 67.9)    | 61.4 (59.4 - 63.4)   | 62.4 (60.5 - 64.2)  | 67.5 (65.9 - 69.1)   | 58.8 (58.3 - 59.4)          |
|                                      | 15-49    | 75.0 (71.9 - 77.7)     | 75.7 (73.4 - 77.8)  | 65.8 (59.3 - 71.6)    | 72.7 (66.6 - 77.8)   | 59.9 (53.9 - 65.4)  | 71.0 (65.6 - 75.8)   | 67.6 (65.9 - 69.2)          |
|                                      | 50-64    | 73.8 (71.9 - 75.6)     | 73.4 (72.1 - 74.6)  | 68.0 (65.0 - 70.8)    | 66.5 (62.8 - 69.9)   | 63.7 (60.1 - 67.1)  | 68.7 (65.6 - 71.6)   | 65.2 (64.2 - 66.2)          |
|                                      | 65-79    | 72.6 (71.0 - 74.1)     | 70.9 (69.7 - 72.1)  | 64.7 (62.4 - 66.9)    | 61.7 (58.6 - 64.6)   | 65.7 (63.1 - 68.2)  | 68.3 (66.0 - 70.5)   | 60.2 (59.4 - 61.0)          |
|                                      | 80-99    | 63.2 (60.3 - 65.9)     | 64.0 (61.9 - 66.0)  | 66.4 (61.4 - 70.8)    | 44.6 (39.3 - 49.7)   | 53.8 (49.4 - 58.0)  | 62.1 (57.9 - 66.1)   | 40.0 (38.9 - 41.1)          |
| <b>TNM Stage<sup>3</sup></b>         |          |                        |                     |                       |                      |                     |                      |                             |
| Stage I                              | All ages | 99.3 (97.0 - 100.0)    | 94.1 (92.5 - 95.7)  | 99.6 (95.6 - 100.0)   | 91.7 (87.4 - 96.1)   |                     | 97.3 (93.8 - 100.0)  | 96.2 (94.8 - 97.6)          |
|                                      | 15-49    | 98.9 (96.1 - 100.0)    | 97.1 (94.5 - 99.7)  | 87.1 (75.8 - 98.3)    | 97.8 (92.6 - 100.0)  |                     | 100.0 (98.9 - 100.0) | 96.4 (94.0 - 98.8)          |
|                                      | 50-64    | 96.7 (93.7 - 99.7)     | 96.2 (94.4 - 98.0)  | 96.9 (92.3 - 100.0)   | 92.1 (86.3 - 97.8)   |                     | 93.1 (87.1 - 99.1)   | 96.4 (95.0 - 97.8)          |
|                                      | 65-79    | 96.0 (92.5 - 99.5)     | 95.4 (93.0 - 97.7)  | 98.9 (93.7 - 100.0)   | 94.0 (87.9 - 100.0)  |                     | 99.2 (95.0 - 100.0)  | 97.8 (96.0 - 99.6)          |
|                                      | 80-99    | 100.0 (100.0 - 100.0)  | 86.2 (80.2 - 92.2)  | 100.0 (97.5 - 100.0)  | 80.7 (64.3 - 97.1)   |                     | 100.0 (88.1 - 100.0) | 92.5 (86.7 - 98.3)          |
| Stage II                             | All ages | 89.5 (87.1 - 91.8)     | 88.5 (87.2 - 89.9)  | 89.6 (87.0 - 92.2)    | 84.7 (81.7 - 87.7)   |                     | 91.0 (88.8 - 93.3)   | 85.2 (84.4 - 86.0)          |
|                                      | 15-49    | 91.5 (85.3 - 97.7)     | 94.0 (90.5 - 97.5)  | 88.7 (79.4 - 97.9)    | 95.7 (90.2 - 100.0)  |                     | 94.8 (89.9 - 99.6)   | 90.9 (88.2 - 93.6)          |
|                                      | 50-64    | 96.9 (94.1 - 99.6)     | 90.3 (88.2 - 92.4)  | 77.9 (73.0 - 82.8)    | 93.9 (90.0 - 97.8)   |                     | 92.6 (89.2 - 96.1)   | 89.4 (87.9 - 91.0)          |
|                                      | 65-79    | 88.1 (84.5 - 91.6)     | 88.0 (86.0 - 90.0)  | 87.0 (83.5 - 90.5)    | 79.9 (75.1 - 84.7)   |                     | 89.7 (86.6 - 92.9)   | 86.2 (84.7 - 87.7)          |
|                                      | 80-99    | 80.3 (72.2 - 88.4)     | 84.1 (79.7 - 88.5)  | 94.5 (85.6 - 100.0)   | 72.3 (61.8 - 82.9)   |                     | 89.4 (81.8 - 97.1)   | 72.7 (69.9 - 75.5)          |
| Stage III                            | All ages | 72.4 (69.4 - 75.4)     | 69.8 (68.1 - 71.5)  | 74.0 (71.0 - 77.0)    | 65.4 (61.7 - 69.0)   |                     | 72.6 (69.5 - 75.7)   | 62.7 (61.6 - 63.7)          |
|                                      | 15-49    | 81.0 (73.4 - 88.5)     | 84.2 (80.3 - 88.1)  | 80.3 (70.1 - 90.6)    | 84.6 (77.4 - 91.9)   |                     | 80.7 (71.8 - 89.5)   | 79.2 (76.4 - 82.0)          |
|                                      | 50-64    | 79.3 (74.5 - 84.2)     | 78.0 (75.5 - 80.5)  | 77.9 (73.0 - 82.8)    | 73.3 (67.4 - 79.1)   |                     | 79.8 (74.7 - 84.9)   | 73.0 (71.0 - 75.1)          |
|                                      | 65-79    | 69.5 (64.9 - 74.1)     | 67.6 (65.0 - 70.3)  | 72.8 (68.5 - 77.1)    | 66.1 (60.5 - 71.7)   |                     | 69.3 (64.6 - 74.0)   | 61.9 (60.3 - 63.6)          |
|                                      | 80-99    | 58.9 (49.9 - 67.8)     | 51.7 (47.5 - 56.0)  | 64.1 (53.8 - 74.3)    | 37.1 (26.6 - 47.6)   |                     | 61.6 (52.9 - 70.2)   | 35.8 (33.2 - 38.4)          |
| Stage IV                             | All ages | 16.0 (13.5 - 18.6)     | 11.2 (10.0 - 12.4)  | 16.6 (14.3 - 18.9)    | 11.5 (9.1 - 13.9)    |                     | 17.6 (15.2 - 20.0)   | 8.9 (8.3 - 9.6)             |
|                                      | 15-49    | 28.0 (18.7 - 37.3)     | 21.5 (16.6 - 26.4)  | 24.9 (14.7 - 35.1)    | 14.7 (5.1 - 24.2)    |                     | 24.2 (15.0 - 33.3)   | 17.1 (13.7 - 20.5)          |
|                                      | 50-64    | 22.5 (17.3 - 27.7)     | 16.1 (13.8 - 18.4)  | 25.2 (20.3 - 30.1)    | 17.9 (12.6 - 23.1)   |                     | 24.4 (19.3 - 29.5)   | 13.8 (12.2 - 15.5)          |
|                                      | 65-79    | 13.6 (9.6 - 17.6)      | 8.9 (7.0 - 10.8)    | 12.1 (9.3 - 15.0)     | 9.2 (6.1 - 12.4)     |                     | 15.2 (11.8 - 18.5)   | 6.6 (5.7 - 7.4)             |
|                                      | 80-99    | 2.9 (0.5 - 5.2)        | 1.6 (0.7 - 2.4)     | 7.3 (3.8 - 10.8)      | 2.5 (0.3 - 4.6)      |                     | 6.0 (3.1 - 9.0)      | 1.2 (0.7 - 1.7)             |
| <b>Mapped SEER stage<sup>4</sup></b> |          |                        |                     |                       |                      |                     |                      |                             |
| Localised                            | All ages | 95.7 (94.4 - 96.9)     | 93.3 (92.2 - 94.5)  | 97.6 (95.5 - 99.7)    | 91.0 (88.4 - 93.6)   | 95.2 (92.6 - 97.8)  | 94.4 (92.4 - 96.3)   | 91.9 (91.0 - 92.8)          |
|                                      | 15-49    | 97.7 (95.4 - 99.9)     | 95.8 (92.9 - 98.7)  | 91.6 (84.8 - 98.4)    | 98.0 (94.4 - 100.0)  | 95.3 (89.3 - 100.0) | 97.7 (94.6 - 100.0)  | 94.6 (93.0 - 96.1)          |
|                                      | 50-64    | 96.7 (95.1 - 98.3)     | 94.5 (93.0 - 95.9)  | 94.9 (91.9 - 98.0)    | 94.8 (91.6 - 98.0)   | 96.0 (92.4 - 99.6)  | 93.1 (89.9 - 96.3)   | 93.9 (92.5 - 95.2)          |
|                                      | 65-79    | 95.2 (93.5 - 96.9)     | 93.0 (91.3 - 94.8)  | 94.3 (91.3 - 97.2)    | 91.2 (87.3 - 95.1)   | 94.5 (91.1 - 98.0)  | 94.3 (91.6 - 97.0)   | 93.1 (91.9 - 94.3)          |
|                                      | 80-99    | 93.9 (89.0 - 98.9)     | 90.0 (86.1 - 93.9)  | 100.0 (100.0 - 100.0) | 79.5 (69.6 - 89.4)   | 95.1 (84.7 - 100.0) | 94.9 (87.9 - 100.0)  | 84.5 (81.7 - 87.2)          |
| Regional                             | All ages | 78.0 (76.5 - 79.5)     | 75.2 (73.9 - 76.5)  | 71.4 (68.7 - 74.1)    | 66.4 (63.2 - 69.5)   | 74.0 (71.4 - 76.5)  | 73.1 (70.2 - 75.9)   | 61.8 (60.7 - 62.9)          |
|                                      | 15-49    | 86.1 (82.2 - 90.0)     | 86.9 (83.9 - 90.0)  | 78.1 (68.3 - 87.9)    | 85.4 (78.9 - 92.0)   | 75.9 (68.3 - 83.5)  | 80.3 (72.0 - 88.7)   | 78.2 (75.5 - 80.9)          |
|                                      | 50-64    | 84.3 (81.8 - 86.8)     | 81.7 (79.7 - 83.7)  | 76.1 (71.5 - 80.7)    | 75.0 (69.6 - 80.3)   | 78.4 (73.6 - 83.2)  | 81.2 (76.4 - 86.0)   | 72.8 (70.9 - 74.7)          |
|                                      | 65-79    | 76.3 (74.0 - 78.6)     | 74.0 (72.0 - 76.0)  | 71.4 (67.4 - 75.3)    | 63.3 (58.4 - 68.3)   | 74.8 (71.2 - 78.4)  | 69.5 (65.1 - 73.9)   | 61.1 (59.5 - 62.7)          |
|                                      | 80-99    | 64.3 (59.8 - 68.9)     | 60.2 (56.7 - 63.8)  | 57.5 (49.3 - 65.6)    | 44.4 (35.2 - 53.6)   | 62.9 (56.5 - 69.3)  | 62.1 (54.2 - 70.0)   | 34.5 (32.6 - 36.4)          |
| Distant                              | All ages | 18.4 (16.7 - 20.2)     | 13.6 (12.5 - 14.8)  | 16.9 (14.5 - 19.3)    | 11.6 (9.1 - 14.0)    | 13.7 (11.2 - 16.2)  | 17.7 (15.2 - 20.1)   | 8.4 (7.7 - 9.0)             |
|                                      | 15-49    | 29.2 (23.1 - 35.3)     | 23.9 (19.2 - 28.7)  | 24.8 (14.7 - 35.0)    | 14.4 (4.4 - 24.5)    | 19.5 (11.2 - 27.9)  | 24.2 (14.9 - 33.4)   | 14.8 (11.8 - 17.8)          |
|                                      | 50-64    | 24.8 (21.3 - 28.4)     | 18.8 (16.4 - 21.2)  | 25.5 (20.5 - 30.5)    | 18.0 (12.7 - 23.3)   | 16.4 (11.3 - 21.4)  | 24.5 (19.4 - 29.6)   | 12.9 (11.3 - 14.4)          |
|                                      | 65-79    | 15.8 (13.2 - 18.5)     | 11.8 (10.0 - 13.6)  | 12.4 (9.5 - 15.2)     | 9.4 (6.1 - 12.6)     | 13.7 (10.0 - 17.5)  | 15.2 (11.8 - 18.6)   | 6.3 (5.4 - 7.2)             |
|                                      | 80-99    | 5.9 (3.6 - 8.2)        | 2.5 (1.3 - 3.7)     | 7.5 (3.9 - 11.1)      | 2.3 (0.3 - 4.4)      | 4.3 (0.2 - 8.4)     | 6.2 (3.2 - 9.2)      | 1.3 (0.8 - 1.7)             |

Abbreviation: NS = net survival, CI = confidence interval

All ages=Age-standardised

<sup>1</sup>Australia includes Victoria (Data on both TNM and SEER) and New South Wales (Data on SEER only)

<sup>2</sup>Canada includes Alberta, British Columbia, New Brunswick, Manitoba, Newfoundland, Nova Scotia, Ontario, Prince Edward Island, and Saskatchewan; Ireland (2010-2013); United Kingdom includes England, Northern Ireland, Scotland, and Wales

<sup>3</sup> Model1: Age spline with mapped SEER stage as time-dependent covariate

<sup>4</sup> Model2: Age spline allowing separate models for each stage category

**Supplementary Table 6A.** Age-standardised and age-specific one-year net survival (%) by (imputed) stage at diagnosis and country for male rectal cancer patients diagnosed during 2010-2014

| Stage                                |          | Australia <sup>1</sup> | Canada <sup>1</sup>   | Denmark             | Ireland <sup>1</sup>  | New Zealand         | Norway               | United Kingdom <sup>1</sup> |
|--------------------------------------|----------|------------------------|-----------------------|---------------------|-----------------------|---------------------|----------------------|-----------------------------|
|                                      |          | 1-year NS (95% CI)     | 1-year NS (95% CI)    | 1-year NS (95% CI)  | 1-year NS (95% CI)    | 1-year NS (95% CI)  | 1-year NS (95% CI)   | 1-year NS (95% CI)          |
| All patients <sup>2</sup>            | All ages | 89.8 (88.8 - 90.8)     | 87.3 (86.5 - 88.1)    | 87.6 (86.1 - 88.9)  | 86.3 (84.2 - 88.1)    | 85.9 (84.0 - 87.6)  | 89.3 (87.7 - 90.6)   | 85.2 (84.7 - 85.6)          |
|                                      | 15-49    | 96.1 (93.8 - 97.5)     | 94.0 (92.1 - 95.4)    | 90.6 (84.5 - 94.4)  | 90.6 (84.5 - 94.4)    | 92.2 (86.6 - 95.6)  | 93.8 (88.7 - 96.7)   | 90.0 (88.4 - 91.5)          |
|                                      | 50-64    | 93.6 (92.2 - 94.8)     | 91.7 (90.6 - 92.6)    | 91.3 (89.2 - 93.1)  | 91.3 (89.2 - 93.1)    | 90.6 (87.5 - 92.9)  | 94.0 (91.7 - 95.6)   | 90.6 (89.8 - 91.3)          |
|                                      | 65-79    | 88.2 (86.6 - 89.7)     | 87.5 (86.3 - 88.7)    | 87.8 (86.0 - 89.4)  | 87.7 (84.7 - 90.1)    | 85.1 (82.3 - 87.5)  | 91.1 (88.9 - 92.8)   | 84.9 (84.2 - 85.6)          |
|                                      | 80-99    | 82.5 (78.9 - 85.7)     | 74.5 (71.6 - 77.2)    | 76.1 (71.1 - 80.4)  | 69.2 (61.4 - 75.7)    | 74.5 (67.7 - 80.1)  | 73.2 (67.5 - 78.0)   | 71.9 (70.3 - 73.4)          |
| <b>TNM Stage<sup>3</sup></b>         |          |                        |                       |                     |                       |                     |                      |                             |
| Stage I                              | All ages | 98.2 (96.6 - 99.7)     | 95.4 (94.1 - 96.7)    | 95.8 (93.0 - 98.6)  | 96.6 (93.1 - 100.0)   |                     | 98.2 (96.4 - 100.0)  | 97.6 (97.0 - 98.2)          |
|                                      | 15-49    | 100.0 (98.6 - 100.0)   | 100.0 (100.0 - 100.0) | 99.8 (96.1 - 100.0) | 100.0 (100.0 - 100.0) |                     | 99.5 (95.9 - 100.0)  | 98.9 (97.4 - 100.0)         |
|                                      | 50-64    | 100.0 (99.0 - 100.0)   | 98.1 (96.9 - 99.4)    | 99.1 (96.6 - 100.0) | 99.0 (95.9 - 100.0)   |                     | 99.7 (98.1 - 100.0)  | 99.2 (98.5 - 99.9)          |
|                                      | 65-79    | 95.8 (92.9 - 98.7)     | 95.9 (94.0 - 97.7)    | 95.7 (92.6 - 98.8)  | 96.0 (91.4 - 100.0)   |                     | 99.5 (97.4 - 100.0)  | 97.7 (96.7 - 98.7)          |
|                                      | 80-99    | 99.7 (93.2 - 100.0)    | 85.4 (80.0 - 90.9)    | 85.4 (73.5 - 97.4)  | 92.7 (78.7 - 100.0)   |                     | 90.2 (79.9 - 100.0)  | 93.5 (90.7 - 96.3)          |
| Stage II                             | All ages | 99.6 (96.6 - 100.0)    | 94.0 (92.5 - 95.5)    | 94.2 (92.0 - 96.3)  | 90.1 (84.6 - 95.6)    |                     | 97.2 (94.9 - 99.4)   | 93.0 (92.0 - 94.0)          |
|                                      | 15-49    | 97.8 (94.6 - 100.0)    | 98.4 (96.0 - 100.0)   | 98.7 (93.3 - 100.0) | 92.8 (78.7 - 100.0)   |                     | 99.9 (97.6 - 100.0)  | 99.0 (97.2 - 100.0)         |
|                                      | 50-64    | 97.3 (93.0 - 100.0)    | 96.2 (94.4 - 98.1)    | 95.6 (92.6 - 98.5)  | 95.2 (89.8 - 100.0)   |                     | 100.0 (99.7 - 100.0) | 97.1 (96.0 - 98.3)          |
|                                      | 65-79    | 97.3 (93.0 - 100.0)    | 94.6 (92.4 - 96.7)    | 94.6 (91.8 - 97.3)  | 92.3 (87.4 - 97.1)    |                     | 98.0 (95.2 - 100.0)  | 91.9 (90.4 - 93.3)          |
|                                      | 80-99    | 97.6 (89.5 - 100.0)    | 85.2 (79.7 - 90.8)    | 85.8 (77.2 - 94.4)  | 79.2 (63.8 - 94.6)    |                     | 87.6 (77.8 - 97.4)   | 83.8 (80.2 - 87.4)          |
| Stage III                            | All ages | 94.8 (91.9 - 97.6)     | 92.4 (91.1 - 93.6)    | 94.0 (92.0 - 96.1)  | 92.8 (90.0 - 95.5)    |                     | 95.0 (92.1 - 97.8)   | 91.4 (90.6 - 92.2)          |
|                                      | 15-49    | 99.1 (95.5 - 100.0)    | 98.3 (96.8 - 99.8)    | 96.2 (90.9 - 100.0) | 100.0 (100.0 - 100.0) |                     | 99.8 (96.6 - 100.0)  | 95.1 (93.3 - 96.8)          |
|                                      | 50-64    | 98.4 (95.7 - 100.0)    | 95.9 (94.7 - 97.2)    | 97.2 (94.8 - 99.7)  | 97.3 (95.0 - 99.7)    |                     | 98.3 (95.8 - 100.0)  | 95.9 (94.9 - 96.9)          |
|                                      | 65-79    | 94.1 (90.0 - 98.1)     | 93.0 (91.2 - 94.7)    | 92.8 (90.0 - 95.6)  | 94.4 (91.0 - 97.8)    |                     | 97.1 (93.0 - 100.0)  | 91.6 (90.4 - 92.8)          |
|                                      | 80-99    | 87.9 (77.6 - 98.3)     | 79.9 (74.4 - 85.3)    | 89.5 (81.7 - 97.3)  | 73.5 (61.3 - 85.8)    |                     | 80.3 (67.9 - 92.7)   | 79.0 (75.9 - 82.1)          |
| Stage IV                             | All ages | 64.2 (58.7 - 69.7)     | 57.6 (55.0 - 60.1)    | 62.6 (57.9 - 67.3)  | 57.8 (51.7 - 63.9)    |                     | 65.9 (61.5 - 70.2)   | 54.3 (52.8 - 55.7)          |
|                                      | 15-49    | 83.5 (72.5 - 94.5)     | 75.2 (68.6 - 81.9)    | 66.3 (49.6 - 82.9)  | 80.6 (63.2 - 98.0)    |                     | 83.7 (74.0 - 93.4)   | 67.7 (62.7 - 72.8)          |
|                                      | 50-64    | 75.4 (66.8 - 84.0)     | 69.1 (65.3 - 72.9)    | 72.0 (65.6 - 78.4)  | 65.0 (55.8 - 74.2)    |                     | 79.4 (73.3 - 85.6)   | 64.7 (61.9 - 67.5)          |
|                                      | 65-79    | 58.3 (49.3 - 67.3)     | 53.5 (49.4 - 57.7)    | 64.1 (58.8 - 69.4)  | 57.1 (47.8 - 66.4)    |                     | 67.4 (60.9 - 73.9)   | 51.2 (49.0 - 53.4)          |
|                                      | 80-99    | 42.6 (29.0 - 56.2)     | 36.1 (29.8 - 42.5)    | 37.5 (26.8 - 48.2)  | 30.0 (13.9 - 46.0)    |                     | 30.6 (19.6 - 41.5)   | 33.5 (30.1 - 37.0)          |
| <b>Mapped SEER stage<sup>4</sup></b> |          |                        |                       |                     |                       |                     |                      |                             |
| Localised                            | All ages | 96.8 (95.7 - 97.8)     | 95.7 (94.7 - 96.7)    | 95.6 (94.1 - 97.1)  | 95.1 (92.4 - 97.7)    | 98.8 (96.8 - 100.0) | 97.8 (96.4 - 99.3)   | 95.9 (95.3 - 96.4)          |
|                                      | 15-49    | 99.7 (98.5 - 100.0)    | 99.8 (98.9 - 100.0)   | 99.7 (97.0 - 100.0) | 96.1 (88.3 - 100.0)   | 99.3 (95.1 - 100.0) | 99.7 (97.6 - 100.0)  | 99.2 (98.2 - 100.0)         |
|                                      | 50-64    | 98.8 (97.7 - 99.9)     | 98.1 (97.1 - 99.1)    | 97.5 (95.4 - 99.7)  | 97.9 (95.2 - 100.0)   | 99.7 (98.2 - 100.0) | 100.0 (99.2 - 100.0) | 98.4 (97.8 - 99.0)          |
|                                      | 65-79    | 95.3 (93.5 - 97.0)     | 96.1 (94.7 - 97.5)    | 95.8 (93.8 - 97.8)  | 95.6 (92.4 - 98.7)    | 99.3 (96.6 - 100.0) | 100.0 (99.2 - 100.0) | 95.7 (94.9 - 96.5)          |
|                                      | 80-99    | 94.8 (90.7 - 98.9)     | 87.2 (82.8 - 91.7)    | 86.7 (79.7 - 93.7)  | 88.9 (78.8 - 99.0)    | 95.9 (87.6 - 100.0) | 99.1 (97.5 - 100.0)  | 89.1 (86.7 - 91.5)          |
| Regional                             | All ages | 95.6 (94.3 - 96.9)     | 92.0 (90.9 - 93.1)    | 93.1 (91.0 - 95.3)  | 91.8 (89.3 - 94.4)    | 95.4 (93.3 - 97.4)  | 95.3 (92.7 - 97.8)   | 90.5 (89.8 - 91.2)          |
|                                      | 15-49    | 99.8 (98.8 - 100.0)    | 98.4 (97.0 - 99.7)    | 95.8 (90.4 - 100.0) | 100.0 (100.0 - 100.0) | 98.0 (94.2 - 100.0) | 98.7 (92.6 - 100.0)  | 94.9 (93.0 - 96.7)          |
|                                      | 50-64    | 98.2 (96.8 - 99.6)     | 95.1 (93.9 - 96.3)    | 96.5 (94.1 - 98.8)  | 97.0 (94.6 - 99.5)    | 97.5 (95.0 - 100.0) | 98.6 (96.4 - 100.0)  | 95.4 (94.6 - 96.3)          |
|                                      | 65-79    | 95.0 (92.8 - 97.1)     | 92.4 (90.8 - 94.0)    | 92.4 (89.6 - 95.2)  | 92.5 (89.0 - 96.1)    | 95.4 (92.4 - 98.3)  | 97.0 (93.9 - 100.0)  | 90.5 (89.4 - 91.5)          |
|                                      | 80-99    | 89.2 (83.8 - 94.6)     | 81.0 (76.6 - 85.4)    | 86.1 (78.0 - 94.2)  | 73.6 (62.1 - 85.1)    | 89.1 (80.2 - 98.1)  | 82.1 (71.3 - 92.9)   | 77.5 (74.7 - 80.2)          |
| Distant                              | All ages | 60.0 (56.4 - 63.6)     | 57.6 (55.1 - 60.2)    | 62.6 (57.8 - 67.5)  | 57.2 (51.3 - 63.0)    | 51.9 (46.5 - 57.3)  | 65.5 (61.1 - 69.8)   | 53.8 (52.3 - 55.2)          |
|                                      | 15-49    | 82.8 (75.1 - 90.4)     | 75.2 (68.7 - 81.7)    | 66.9 (50.5 - 83.2)  | 80.4 (62.8 - 97.9)    | 76.9 (63.6 - 90.2)  | 83.8 (73.5 - 94.2)   | 67.4 (62.2 - 72.5)          |
|                                      | 50-64    | 71.6 (66.1 - 77.1)     | 70.1 (66.3 - 73.8)    | 72.0 (65.6 - 78.5)  | 65.2 (56.2 - 74.2)    | 65.5 (56.1 - 74.9)  | 79.3 (73.2 - 85.3)   | 64.4 (61.8 - 67.1)          |
|                                      | 65-79    | 53.9 (48.2 - 59.6)     | 54.2 (50.1 - 58.3)    | 63.8 (58.6 - 69.1)  | 57.1 (47.8 - 66.3)    | 42.5 (33.7 - 51.3)  | 67.5 (61.5 - 73.6)   | 50.6 (48.3 - 52.9)          |
|                                      | 80-99    | 39.0 (29.9 - 48.1)     | 33.3 (27.0 - 39.7)    | 38.9 (28.0 - 49.8)  | 26.7 (12.6 - 40.7)    | 32.8 (20.8 - 44.8)  | 29.5 (18.9 - 40.2)   | 32.8 (29.6 - 36.1)          |

Abbreviation: NS = net survival, CI = confidence interval

All ages=Age-standardised

<sup>1</sup>Australia includes Victoria (Data on both TNM and SEER) and New South Wales (Data on SEER only)

<sup>2</sup>Canada includes Alberta, British Columbia, New Brunswick, Manitoba, Newfoundland, Nova Scotia, Ontario, Prince Edward Island, and Saskatchewan; Ireland (2010-2013); United Kingdom includes England, Northern Ireland, Scotland, and Wales

<sup>3</sup>Model1: Age spline with mapped SEER stage as time-dependent covariate

<sup>4</sup>Model2: Age spline allowing separate models for each stage category

**Supplementary Table 6B.** Age-standardised and age-specific five-year net survival (%) by (imputed) stage at diagnosis and country for male rectal cancer patients diagnosed during 2010-2014

| Stage                                | Australia <sup>1</sup> |                      | Canada <sup>1</sup> |                     | Denmark             |                     | Ireland <sup>1</sup> |                    | New Zealand        |                    | Norway             |                    | United Kingdom <sup>1</sup> |                    |
|--------------------------------------|------------------------|----------------------|---------------------|---------------------|---------------------|---------------------|----------------------|--------------------|--------------------|--------------------|--------------------|--------------------|-----------------------------|--------------------|
|                                      | 5-year NS (95% CI)     | 5-year NS (95% CI)   | 5-year NS (95% CI)  | 5-year NS (95% CI)  | 5-year NS (95% CI)  | 5-year NS (95% CI)  | 5-year NS (95% CI)   | 5-year NS (95% CI) | 5-year NS (95% CI) | 5-year NS (95% CI) | 5-year NS (95% CI) | 5-year NS (95% CI) | 5-year NS (95% CI)          | 5-year NS (95% CI) |
| All patients <sup>2</sup>            | All ages               | 70.1 (68.5 - 71.6)   | 70.0 (68.8 - 71.2)  | 68.6 (66.3 - 70.7)  | 60.8 (58.0 - 63.5)  | 64.0 (61.1 - 66.8)  | 68.5 (65.9 - 70.9)   | 61.6 (60.9 - 62.3) |                    |                    |                    |                    |                             |                    |
|                                      | 15-49                  | 77.6 (73.6 - 81.0)   | 77.3 (74.3 - 79.9)  | 73.1 (65.3 - 79.4)  | 70.2 (61.8 - 77.1)  | 70.3 (62.0 - 77.1)  | 74.5 (66.6 - 80.8)   | 67.5 (65.1 - 69.8) |                    |                    |                    |                    |                             |                    |
|                                      | 50-64                  | 73.7 (71.5 - 75.8)   | 75.1 (73.4 - 76.6)  | 73.3 (70.1 - 76.3)  | 64.5 (60.3 - 68.3)  | 71.0 (66.5 - 75.0)  | 70.8 (67.0 - 74.2)   | 68.8 (67.7 - 69.9) |                    |                    |                    |                    |                             |                    |
|                                      | 65-79                  | 68.6 (66.2 - 70.9)   | 71.0 (69.2 - 72.8)  | 67.7 (64.8 - 70.5)  | 61.4 (57.3 - 65.2)  | 62.1 (58.0 - 65.9)  | 71.3 (67.8 - 74.6)   | 63.0 (62.0 - 64.1) |                    |                    |                    |                    |                             |                    |
|                                      | 80-99                  | 61.4 (55.2 - 67.0)   | 53.8 (49.2 - 58.1)  | 55.5 (46.8 - 63.4)  | 46.1 (35.9 - 55.6)  | 53.1 (42.3 - 62.7)  | 53.1 (43.8 - 61.5)   | 40.0 (37.7 - 42.2) |                    |                    |                    |                    |                             |                    |
| <b>TNM Stage<sup>3</sup></b>         |                        |                      |                     |                     |                     |                     |                      |                    |                    |                    |                    |                    |                             |                    |
| Stage I                              | All ages               | 95.7 (92.3 - 99.1)   | 90.1 (87.4 - 92.7)  | 92.3 (87.4 - 97.2)  | 91.0 (84.9 - 97.1)  | 94.5 (90.0 - 99.0)  | 91.5 (90.2 - 92.9)   |                    |                    |                    |                    |                    |                             |                    |
|                                      | 15-49                  | 98.0 (93.4 - 100.0)  | 96.7 (92.9 - 100.0) | 91.5 (78.3 - 100.0) | 95.8 (85.6 - 100.0) | 96.9 (89.8 - 100.0) | 94.1 (90.4 - 97.9)   |                    |                    |                    |                    |                    |                             |                    |
|                                      | 50-64                  | 95.3 (91.9 - 98.6)   | 95.1 (92.6 - 97.6)  | 96.3 (90.8 - 100.0) | 99.3 (93.7 - 100.0) | 98.3 (94.4 - 100.0) | 93.6 (91.9 - 95.4)   |                    |                    |                    |                    |                    |                             |                    |
|                                      | 65-79                  | 92.5 (87.6 - 97.4)   | 91.1 (87.7 - 94.4)  | 92.0 (85.7 - 98.4)  | 82.7 (73.3 - 92.1)  | 94.8 (89.3 - 100.0) | 93.0 (91.0 - 94.9)   |                    |                    |                    |                    |                    |                             |                    |
|                                      | 80-99                  | 100.0 (86.5 - 100.0) | 73.1 (62.7 - 83.5)  | 79.5 (56.2 - 100.0) | 94.7 (67.1 - 100.0) | 82.5 (60.5 - 100.0) | 82.1 (75.4 - 88.9)   |                    |                    |                    |                    |                    |                             |                    |
| Stage II                             | All ages               | 83.6 (78.9 - 88.4)   | 78.7 (76.0 - 81.5)  | 84.6 (80.1 - 89.0)  | 74.4 (67.9 - 81.0)  | 86.4 (81.2 - 91.6)  | 74.5 (72.1 - 77.0)   |                    |                    |                    |                    |                    |                             |                    |
|                                      | 15-49                  | 86.6 (74.7 - 98.5)   | 85.3 (78.8 - 91.7)  | 84.2 (70.8 - 97.7)  | 88.5 (71.8 - 100.0) | 96.2 (87.0 - 100.0) | 83.8 (77.4 - 90.3)   |                    |                    |                    |                    |                    |                             |                    |
|                                      | 50-64                  | 81.5 (74.7 - 88.3)   | 85.8 (82.5 - 89.1)  | 82.5 (77.7 - 87.3)  | 78.6 (69.6 - 87.7)  | 88.4 (82.2 - 94.7)  | 82.4 (79.2 - 85.6)   |                    |                    |                    |                    |                    |                             |                    |
|                                      | 65-79                  | 84.3 (76.8 - 91.8)   | 79.7 (75.6 - 83.8)  | 84.7 (79.5 - 89.8)  | 75.8 (67.8 - 83.9)  | 89.5 (82.9 - 96.0)  | 75.2 (72.6 - 77.8)   |                    |                    |                    |                    |                    |                             |                    |
|                                      | 80-99                  | 82.0 (63.0 - 100.0)  | 57.2 (46.2 - 68.3)  | 73.6 (54.2 - 93.0)  | 54.4 (32.5 - 76.3)  | 69.0 (50.3 - 87.7)  | 50.2 (43.7 - 56.8)   |                    |                    |                    |                    |                    |                             |                    |
| Stage III                            | All ages               | 65.1 (60.1 - 70.0)   | 70.0 (67.3 - 72.7)  | 75.9 (72.1 - 79.6)  | 67.0 (62.5 - 71.5)  | 76.6 (71.4 - 81.8)  | 64.0 (62.5 - 65.6)   |                    |                    |                    |                    |                    |                             |                    |
|                                      | 15-49                  | 74.8 (63.9 - 85.6)   | 83.0 (78.2 - 87.8)  | 80.1 (70.2 - 89.9)  | 83.5 (74.3 - 92.8)  | 89.4 (77.2 - 100.0) | 74.0 (69.9 - 78.2)   |                    |                    |                    |                    |                    |                             |                    |
|                                      | 50-64                  | 74.9 (68.2 - 81.7)   | 78.4 (75.6 - 81.1)  | 82.5 (77.7 - 87.3)  | 75.6 (70.0 - 81.2)  | 79.3 (72.1 - 86.5)  | 73.9 (71.7 - 76.1)   |                    |                    |                    |                    |                    |                             |                    |
|                                      | 65-79                  | 61.6 (54.3 - 68.8)   | 71.3 (67.7 - 74.9)  | 75.0 (70.1 - 80.0)  | 66.2 (59.7 - 72.7)  | 78.7 (70.7 - 86.8)  | 64.7 (62.6 - 66.7)   |                    |                    |                    |                    |                    |                             |                    |
|                                      | 80-99                  | 51.5 (34.6 - 68.5)   | 43.9 (34.1 - 53.7)  | 60.2 (42.3 - 78.2)  | 41.0 (25.0 - 56.9)  | 57.3 (38.8 - 75.9)  | 35.7 (29.4 - 41.9)   |                    |                    |                    |                    |                    |                             |                    |
| Stage IV                             | All ages               | 17.3 (13.2 - 21.4)   | 12.1 (9.9 - 14.3)   | 21.8 (18.0 - 25.7)  | 11.3 (8.1 - 14.5)   | 17.5 (13.9 - 21.2)  | 8.7 (7.6 - 9.9)      |                    |                    |                    |                    |                    |                             |                    |
|                                      | 15-49                  | 36.4 (20.8 - 51.9)   | 26.8 (18.7 - 34.9)  | 36.0 (19.5 - 52.6)  | 17.4 (4.0 - 30.9)   | 37.4 (22.7 - 52.2)  | 16.4 (9.9 - 22.9)    |                    |                    |                    |                    |                    |                             |                    |
|                                      | 50-64                  | 20.5 (13.2 - 27.7)   | 17.2 (13.7 - 20.8)  | 27.2 (21.0 - 33.3)  | 13.5 (8.0 - 19.1)   | 24.7 (18.3 - 31.0)  | 13.1 (10.8 - 15.4)   |                    |                    |                    |                    |                    |                             |                    |
|                                      | 65-79                  | 16.4 (9.6 - 23.1)    | 9.3 (6.2 - 12.4)    | 16.2 (11.8 - 20.6)  | 9.7 (4.7 - 14.7)    | 15.4 (9.3 - 21.5)   | 6.9 (5.6 - 8.3)      |                    |                    |                    |                    |                    |                             |                    |
|                                      | 80-99                  | 3.0 (0.0 - 7.5)      | 2.5 (0.0 - 5.7)     | 2.9 (0.0 - 7.7)     | 4.3 (0.0 - 10.8)    | 2.3 (0.0 - 6.1)     | 1.2 (0.1 - 2.2)      |                    |                    |                    |                    |                    |                             |                    |
| <b>Mapped SEER stage<sup>4</sup></b> |                        |                      |                     |                     |                     |                     |                      |                    |                    |                    |                    |                    |                             |                    |
| Localised                            | All ages               | 89.7 (87.7 - 91.8)   | 88.0 (85.7 - 90.3)  | 90.3 (86.9 - 93.6)  | 83.6 (79.3 - 87.9)  | 89.0 (84.3 - 93.7)  | 91.0 (87.7 - 94.4)   | 84.5 (83.3 - 85.6) |                    |                    |                    |                    |                             |                    |
|                                      | 15-49                  | 95.5 (91.5 - 99.4)   | 94.6 (90.8 - 98.4)  | 92.3 (84.0 - 100.0) | 91.8 (81.8 - 100.0) | 98.2 (91.3 - 100.0) | 97.1 (92.1 - 100.0)  | 91.5 (87.9 - 95.1) |                    |                    |                    |                    |                             |                    |
|                                      | 50-64                  | 91.4 (89.0 - 93.8)   | 93.6 (91.5 - 95.8)  | 94.6 (90.9 - 98.3)  | 90.3 (84.8 - 95.8)  | 91.1 (85.4 - 96.8)  | 94.3 (90.6 - 98.0)   | 89.1 (87.6 - 90.6) |                    |                    |                    |                    |                             |                    |
|                                      | 65-79                  | 87.2 (84.2 - 90.3)   | 89.4 (86.2 - 92.5)  | 89.9 (85.8 - 94.1)  | 80.1 (74.1 - 86.1)  | 88.3 (81.4 - 95.1)  | 92.9 (88.6 - 97.2)   | 85.8 (84.0 - 87.6) |                    |                    |                    |                    |                             |                    |
|                                      | 80-99                  | 89.4 (79.7 - 99.1)   | 69.2 (60.4 - 78.1)  | 77.9 (63.4 - 92.4)  | 74.0 (55.5 - 92.5)  | 82.5 (62.8 - 100.0) | 75.8 (61.2 - 90.4)   | 66.6 (61.7 - 71.5) |                    |                    |                    |                    |                             |                    |
| Regional                             | All ages               | 72.7 (70.1 - 75.3)   | 70.9 (68.8 - 72.9)  | 74.4 (70.6 - 78.2)  | 66.5 (62.1 - 70.8)  | 74.3 (69.8 - 78.9)  | 76.4 (71.2 - 81.6)   | 62.3 (60.8 - 63.9) |                    |                    |                    |                    |                             |                    |
|                                      | 15-49                  | 85.0 (79.9 - 90.0)   | 83.0 (78.7 - 87.3)  | 77.9 (68.3 - 87.6)  | 82.3 (72.8 - 91.9)  | 82.0 (71.7 - 92.3)  | 87.6 (73.7 - 100.0)  | 71.8 (67.6 - 76.1) |                    |                    |                    |                    |                             |                    |
|                                      | 50-64                  | 78.4 (75.1 - 81.8)   | 79.0 (76.6 - 81.4)  | 81.4 (76.8 - 86.1)  | 75.3 (69.8 - 80.9)  | 84.0 (77.9 - 90.0)  | 79.9 (72.6 - 87.2)   | 72.6 (70.5 - 74.6) |                    |                    |                    |                    |                             |                    |
|                                      | 65-79                  | 70.5 (66.4 - 74.5)   | 71.8 (68.8 - 74.7)  | 73.9 (69.0 - 78.8)  | 65.3 (59.0 - 71.6)  | 69.3 (62.5 - 76.0)  | 78.2 (71.0 - 85.4)   | 63.0 (60.9 - 65.0) |                    |                    |                    |                    |                             |                    |
|                                      | 80-99                  | 57.5 (47.5 - 67.4)   | 46.5 (38.8 - 54.2)  | 58.9 (42.5 - 75.3)  | 41.7 (26.2 - 57.2)  | 64.2 (43.2 - 85.3)  | 56.7 (37.9 - 75.5)   | 33.3 (28.0 - 38.7) |                    |                    |                    |                    |                             |                    |
| Distant                              | All ages               | 15.6 (13.1 - 18.1)   | 12.8 (10.5 - 15.1)  | 22.4 (18.2 - 26.5)  | 11.2 (7.9 - 14.6)   | 8.0 (4.0 - 11.9)    | 17.6 (13.9 - 21.2)   | 8.3 (7.3 - 9.4)    |                    |                    |                    |                    |                             |                    |
|                                      | 15-49                  | 27.8 (17.8 - 37.8)   | 27.2 (19.5 - 34.8)  | 36.8 (20.4 - 53.3)  | 17.9 (4.2 - 31.6)   | 10.5 (0.0 - 24.4)   | 36.6 (21.9 - 51.4)   | 16.2 (10.5 - 21.9) |                    |                    |                    |                    |                             |                    |
|                                      | 50-64                  | 20.8 (16.3 - 25.4)   | 17.5 (14.1 - 21.0)  | 27.5 (21.1 - 33.9)  | 13.1 (7.6 - 18.5)   | 14.9 (6.0 - 23.7)   | 24.0 (17.1 - 30.8)   | 12.8 (10.6 - 15.1) |                    |                    |                    |                    |                             |                    |
|                                      | 65-79                  | 13.5 (9.8 - 17.1)    | 10.1 (6.9 - 13.2)   | 16.5 (12.0 - 20.9)  | 9.9 (5.0 - 14.8)    | 5.4 (1.1 - 9.7)     | 16.2 (10.7 - 21.7)   | 6.6 (5.2 - 8.0)    |                    |                    |                    |                    |                             |                    |
|                                      | 80-99                  | 3.2 (0.0 - 6.6)      | 3.0 (0.0 - 6.9)     | 3.5 (0.0 - 9.2)     | 4.2 (0.0 - 10.8)    | 3.4 (0.0 - 11.9)    | 2.8 (0.0 - 7.0)      | 0.8 (0.0 - 1.6)    |                    |                    |                    |                    |                             |                    |

Abbreviation: NS = net survival, CI = confidence interval

All ages=Age-standardised

<sup>1</sup>Australia includes Victoria (Data on both TNM and SEER) and New South Wales (Data on SEER only)

<sup>2</sup>Canada includes Alberta, British Columbia, New Brunswick, Manitoba, Newfoundland, Nova Scotia, Ontario, Prince Edward Island, and Saskatchewan; Ireland (2010-2013); United Kingdom includes England, Northern Ireland, Scotland, and Wales

<sup>3</sup>Model1: Age spline with mapped SEER stage as time-dependent covariate

<sup>4</sup>Model2: Age spline allowing separate models for each stage category

**Supplementary Table 7A.** Age-standardised and age-specific one-year net survival (%) by (imputed) stage at diagnosis and country for female rectal cancer patients diagnosed during 2010-2014

| Stage                                |          | Australia <sup>1</sup> | Canada <sup>1</sup>  | Denmark               | Ireland <sup>1</sup>  | New Zealand           | Norway               | United Kingdom <sup>1</sup> |
|--------------------------------------|----------|------------------------|----------------------|-----------------------|-----------------------|-----------------------|----------------------|-----------------------------|
|                                      |          | 1-year NS (95% CI)     | 1-year NS (95% CI)   | 1-year NS (95% CI)    | 1-year NS (95% CI)    | 1-year NS (95% CI)    | 1-year NS (95% CI)   | 1-year NS (95% CI)          |
| All patients <sup>†</sup>            | All ages | 90.4 (89.1 - 91.6)     | 87.3 (86.3 - 88.3)   | 87.4 (85.8 - 88.8)    | 85.9 (83.0 - 88.4)    | 86.3 (83.8 - 88.4)    | 88.9 (87.1 - 90.5)   | 84.5 (83.8 - 85.1)          |
|                                      | 15-49    | 95.7 (93.1 - 97.3)     | 96.1 (94.2 - 97.4)   | 95.1 (89.3 - 97.8)    | 95.1 (89.3 - 97.8)    | 87.6 (79.6 - 92.7)    | 91.1 (84.4 - 95.0)   | 91.4 (89.5 - 92.9)          |
|                                      | 50-64    | 94.8 (93.0 - 96.2)     | 92.4 (91.0 - 93.5)   | 93.4 (90.9 - 95.3)    | 93.4 (90.9 - 95.3)    | 92.5 (88.6 - 95.0)    | 95.4 (92.7 - 97.1)   | 91.5 (90.5 - 92.4)          |
|                                      | 65-79    | 91.7 (89.6 - 93.4)     | 87.6 (85.8 - 89.1)   | 87.5 (85.0 - 89.6)    | 86.0 (81.0 - 89.8)    | 86.5 (82.4 - 89.7)    | 89.2 (86.3 - 91.5)   | 84.7 (83.7 - 85.7)          |
|                                      | 80-99    | 76.9 (72.5 - 80.7)     | 73.8 (70.6 - 76.7)   | 70.0 (64.8 - 74.7)    | 68.7 (59.3 - 76.4)    | 73.7 (66.4 - 79.7)    | 76.9 (71.3 - 81.6)   | 67.1 (65.4 - 68.8)          |
| <b>TNM Stage<sup>‡</sup></b>         |          |                        |                      |                       |                       |                       |                      |                             |
| Stage I                              | All ages | 98.4 (96.2 - 100.0)    | 96.8 (95.4 - 98.1)   | 99.3 (97.4 - 100.0)   | 98.0 (94.8 - 100.0)   |                       | 99.8 (98.1 - 100.0)  | 98.2 (97.5 - 98.9)          |
|                                      | 15-49    | 100.0 (100.0 - 100.0)  | 100.0 (99.4 - 100.0) | 100.0 (100.0 - 100.0) | 100.0 (100.0 - 100.0) |                       | 99.8 (97.5 - 100.0)  | 99.5 (98.3 - 100.0)         |
|                                      | 50-64    | 99.1 (97.0 - 100.0)    | 99.6 (98.7 - 100.0)  | 99.6 (97.9 - 100.0)   | 100.0 (100.0 - 100.0) |                       | 100.0 (98.9 - 100.0) | 99.1 (98.4 - 99.9)          |
|                                      | 65-79    | 99.5 (97.2 - 100.0)    | 97.1 (95.1 - 99.1)   | 99.5 (97.3 - 100.0)   | 98.1 (93.2 - 100.0)   |                       | 99.8 (97.6 - 100.0)  | 99.5 (98.6 - 100.0)         |
|                                      | 80-99    | 94.0 (84.7 - 100.0)    | 89.5 (84.0 - 95.0)   | 97.9 (88.7 - 100.0)   | 92.2 (78.0 - 100.0)   |                       | 99.4 (91.4 - 100.0)  | 92.7 (89.5 - 95.9)          |
| Stage II                             | All ages | 99.5 (95.8 - 100.0)    | 91.6 (89.5 - 93.7)   | 93.2 (90.7 - 95.7)    | 93.2 (88.5 - 97.9)    |                       | 96.5 (93.7 - 99.4)   | 93.1 (91.9 - 94.3)          |
|                                      | 15-49    | 100.0 (98.7 - 100.0)   | 100.0 (98.7 - 100.0) | 96.0 (88.1 - 100.0)   | 100.0 (100.0 - 100.0) |                       | 99.5 (94.8 - 100.0)  | 98.0 (95.6 - 100.0)         |
|                                      | 50-64    | 98.6 (95.3 - 100.0)    | 95.3 (92.7 - 97.8)   | 96.9 (93.4 - 100.0)   | 92.4 (84.9 - 100.0)   |                       | 98.7 (95.7 - 100.0)  | 97.8 (96.4 - 99.2)          |
|                                      | 65-79    | 98.6 (95.3 - 100.0)    | 91.4 (88.1 - 94.7)   | 93.9 (90.1 - 97.7)    | 91.1 (83.0 - 99.3)    |                       | 96.4 (92.4 - 100.0)  | 93.4 (91.5 - 95.4)          |
|                                      | 80-99    | 85.6 (70.1 - 100.0)    | 81.3 (73.9 - 88.6)   | 80.2 (71.2 - 89.2)    | 92.6 (78.2 - 100.0)   |                       | 91.6 (80.9 - 100.0)  | 80.5 (76.9 - 84.0)          |
| Stage III                            | All ages | 94.3 (91.1 - 97.4)     | 93.0 (91.5 - 94.6)   | 92.5 (90.0 - 95.1)    | 87.0 (82.5 - 91.5)    |                       | 96.6 (93.2 - 100.0)  | 90.6 (89.6 - 91.6)          |
|                                      | 15-49    | 100.0 (100.0 - 100.0)  | 98.6 (96.9 - 100.0)  | 99.5 (96.6 - 100.0)   | 100.0 (100.0 - 100.0) |                       | 99.5 (95.9 - 100.0)  | 96.4 (94.6 - 98.2)          |
|                                      | 50-64    | 95.4 (91.0 - 99.8)     | 97.4 (95.9 - 98.9)   | 98.5 (96.3 - 100.0)   | 94.1 (89.6 - 98.5)    |                       | 99.7 (97.3 - 100.0)  | 96.8 (95.8 - 97.9)          |
|                                      | 65-79    | 94.2 (88.4 - 100.0)    | 93.0 (90.5 - 95.5)   | 94.0 (90.6 - 97.4)    | 89.7 (83.3 - 96.1)    |                       | 97.4 (93.6 - 100.0)  | 89.8 (88.2 - 91.5)          |
|                                      | 80-99    | 85.5 (72.7 - 98.2)     | 83.4 (77.9 - 88.9)   | 73.1 (62.9 - 83.3)    | 58.0 (41.5 - 74.5)    |                       | 87.7 (75.6 - 99.7)   | 77.0 (73.7 - 80.4)          |
| Stage IV                             | All ages | 69.5 (63.0 - 76.1)     | 54.2 (50.6 - 57.8)   | 63.0 (58.3 - 67.8)    | 59.6 (50.9 - 68.2)    |                       | 61.5 (56.2 - 66.9)   | 50.6 (48.6 - 52.7)          |
|                                      | 15-49    | 87.5 (77.5 - 97.4)     | 81.6 (74.3 - 88.9)   | 80.5 (64.2 - 96.7)    | 88.6 (73.6 - 100.0)   |                       | 69.5 (53.7 - 85.4)   | 67.6 (61.4 - 73.7)          |
|                                      | 50-64    | 79.5 (69.2 - 89.8)     | 64.2 (58.3 - 70.0)   | 74.7 (66.3 - 83.2)    | 74.9 (62.1 - 87.7)    |                       | 81.8 (73.7 - 89.8)   | 63.7 (59.8 - 67.6)          |
|                                      | 65-79    | 71.7 (60.9 - 82.6)     | 53.0 (47.0 - 58.9)   | 59.9 (52.7 - 67.1)    | 53.8 (39.1 - 68.6)    |                       | 55.6 (46.0 - 65.3)   | 47.1 (43.8 - 50.3)          |
|                                      | 80-99    | 38.4 (21.7 - 55.2)     | 26.9 (19.4 - 34.5)   | 36.2 (25.7 - 46.8)    | 30.4 (12.7 - 48.2)    |                       | 35.8 (25.0 - 46.5)   | 26.3 (23.3 - 29.3)          |
| <b>Mapped SEER stage<sup>‡</sup></b> |          |                        |                      |                       |                       |                       |                      |                             |
| Localised                            | All ages | 96.6 (95.2 - 98.0)     | 96.2 (95.1 - 97.4)   | 98.3 (96.9 - 99.8)    | 97.3 (94.8 - 99.8)    | 98.9 (96.7 - 100.0)   | 98.1 (96.3 - 99.9)   | 96.4 (95.7 - 97.0)          |
|                                      | 15-49    | 100.0 (99.4 - 100.0)   | 100.0 (99.6 - 100.0) | 97.7 (93.1 - 100.0)   | 100.0 (100.0 - 100.0) | 100.0 (100.0 - 100.0) | 99.9 (98.4 - 100.0)  | 98.8 (97.6 - 100.0)         |
|                                      | 50-64    | 98.3 (96.7 - 99.9)     | 99.1 (98.1 - 100.0)  | 99.5 (98.2 - 100.0)   | 96.7 (92.6 - 100.0)   | 100.0 (100.0 - 100.0) | 99.5 (97.9 - 100.0)  | 98.8 (98.1 - 99.5)          |
|                                      | 65-79    | 98.7 (97.1 - 100.0)    | 95.6 (93.7 - 97.5)   | 98.8 (96.9 - 100.0)   | 98.4 (95.0 - 100.0)   | 100.0 (98.3 - 100.0)  | 99.5 (97.9 - 100.0)  | 97.4 (96.4 - 98.4)          |
|                                      | 80-99    | 87.4 (81.3 - 93.6)     | 90.3 (85.9 - 94.7)   | 94.6 (88.1 - 100.0)   | 93.5 (83.2 - 100.0)   | 91.5 (81.1 - 100.0)   | 98.3 (95.8 - 100.0)  | 87.9 (85.5 - 90.3)          |
| Regional                             | All ages | 94.2 (92.4 - 95.9)     | 92.3 (90.9 - 93.7)   | 90.7 (88.3 - 93.2)    | 87.0 (82.9 - 91.0)    | 95.1 (92.4 - 97.8)    | 96.2 (93.7 - 98.8)   | 89.6 (88.5 - 90.6)          |
|                                      | 15-49    | 98.8 (97.1 - 100.0)    | 98.7 (97.1 - 100.0)  | 99.9 (98.2 - 100.0)   | 100.0 (100.0 - 100.0) | 97.0 (91.1 - 100.0)   | 99.7 (96.9 - 100.0)  | 96.0 (94.1 - 97.9)          |
|                                      | 50-64    | 96.9 (94.9 - 98.9)     | 97.2 (95.8 - 98.5)   | 97.5 (95.1 - 99.8)    | 94.1 (89.8 - 98.3)    | 98.5 (95.2 - 100.0)   | 99.7 (97.8 - 100.0)  | 96.5 (95.4 - 97.6)          |
|                                      | 65-79    | 93.0 (90.0 - 96.0)     | 93.1 (90.9 - 95.3)   | 92.1 (88.7 - 95.5)    | 87.5 (81.0 - 93.9)    | 96.4 (92.5 - 100.0)   | 96.9 (92.6 - 100.0)  | 89.0 (87.3 - 90.7)          |
|                                      | 80-99    | 88.6 (81.3 - 95.9)     | 79.9 (74.9 - 84.9)   | 68.4 (59.2 - 77.7)    | 62.2 (47.2 - 77.2)    | 85.0 (74.0 - 96.0)    | 86.9 (75.8 - 97.9)   | 73.9 (70.6 - 77.2)          |
| Distant                              | All ages | 66.8 (62.4 - 71.3)     | 56.4 (53.1 - 59.6)   | 62.8 (58.1 - 67.5)    | 59.3 (50.5 - 68.1)    | 56.8 (50.0 - 63.7)    | 61.9 (56.8 - 67.1)   | 50.0 (47.8 - 52.1)          |
|                                      | 15-49    | 81.8 (73.4 - 90.3)     | 83.1 (76.3 - 89.8)   | 79.8 (63.3 - 96.4)    | 88.9 (74.2 - 100.0)   | 75.7 (63.2 - 88.2)    | 69.4 (53.7 - 85.0)   | 67.7 (61.2 - 74.2)          |
|                                      | 50-64    | 81.4 (74.7 - 88.0)     | 66.3 (61.1 - 71.5)   | 74.1 (65.7 - 82.4)    | 75.4 (62.9 - 88.0)    | 75.9 (66.5 - 85.3)    | 82.2 (74.3 - 90.0)   | 63.0 (59.1 - 67.0)          |
|                                      | 65-79    | 67.0 (59.0 - 75.0)     | 55.4 (49.7 - 61.0)   | 59.9 (53.0 - 66.8)    | 52.5 (37.4 - 67.6)    | 46.7 (34.6 - 58.9)    | 56.3 (47.3 - 65.4)   | 45.8 (42.3 - 49.4)          |
|                                      | 80-99    | 34.3 (24.8 - 43.8)     | 28.9 (22.2 - 35.6)   | 36.7 (27.0 - 46.3)    | 30.6 (12.2 - 49.0)    | 36.1 (22.5 - 49.8)    | 35.7 (25.3 - 46.2)   | 26.3 (23.2 - 29.3)          |

Abbreviation: NS = net survival, CI = confidence interval

All ages=Age-standardised

<sup>1</sup>Australia includes Victoria (Data on both TNM and SEER) and New South Wales (Data on SEER only)

<sup>1</sup>Canada includes Alberta, British Columbia, New Brunswick, Manitoba, Newfoundland, Nova Scotia, Ontario, Prince Edward Island, and Saskatchewan; Ireland (2010-2013); United Kingdom includes England, Northern Ireland, Scotland, and Wales

<sup>†</sup> Model1: Age spline with mapped SEER stage as time-dependent covariate

<sup>‡</sup> Model2: Age spline allowing separate models for each stage category

**Supplementary Table 7B.** Age-standardised and age-specific five-year net survival (%) by (imputed) stage at diagnosis and country for female rectal cancer patients diagnosed during 2010-2014

| Stage                                |          | Australia <sup>1</sup> | Canada <sup>1</sup> | Denmark               | Ireland <sup>1</sup> | New Zealand          | Norway              | United Kingdom <sup>1</sup> |
|--------------------------------------|----------|------------------------|---------------------|-----------------------|----------------------|----------------------|---------------------|-----------------------------|
|                                      |          | 5-year NS (95% CI)     | 5-year NS (95% CI)  | 5-year NS (95% CI)    | 5-year NS (95% CI)   | 5-year NS (95% CI)   | 5-year NS (95% CI)  | 5-year NS (95% CI)          |
| All patients <sup>2</sup>            | All ages | 72.3 (70.3 - 74.2)     | 72.5 (71.0 - 74.0)  | 70.2 (67.6 - 72.7)    | 63.1 (59.2 - 66.8)   | 67.6 (63.8 - 71.0)   | 69.6 (66.7 - 72.2)  | 63.0 (62.1 - 63.9)          |
|                                      | 15-49    | 78.2 (73.8 - 81.9)     | 79.4 (76.0 - 82.4)  | 73.2 (64.6 - 80.0)    | 77.1 (68.0 - 83.9)   | 73.3 (63.9 - 80.6)   | 77.1 (68.5 - 83.6)  | 70.6 (67.9 - 73.1)          |
|                                      | 50-64    | 78.7 (75.8 - 81.3)     | 79.2 (77.2 - 81.1)  | 77.3 (73.3 - 80.7)    | 69.2 (63.4 - 74.2)   | 71.0 (65.3 - 75.9)   | 76.4 (72.0 - 80.3)  | 72.5 (71.0 - 74.0)          |
|                                      | 65-79    | 74.4 (71.3 - 77.3)     | 73.2 (70.7 - 75.5)  | 69.3 (65.6 - 72.7)    | 67.2 (60.9 - 72.7)   | 71.6 (66.0 - 76.4)   | 72.7 (68.4 - 76.5)  | 64.3 (62.9 - 65.7)          |
|                                      | 80-99    | 54.1 (47.8 - 60.0)     | 56.7 (52.1 - 61.1)  | 57.5 (48.8 - 65.2)    | 36.3 (26.7 - 45.8)   | 50.6 (38.9 - 61.1)   | 49.1 (41.1 - 56.6)  | 38.4 (36.2 - 40.5)          |
| <b>TNM Stage<sup>2</sup></b>         |          |                        |                     |                       |                      |                      |                     |                             |
| Stage I                              | All ages | 94.2 (89.1 - 99.3)     | 92.6 (89.9 - 95.3)  | 97.0 (91.1 - 100.0)   | 86.8 (79.4 - 94.3)   |                      | 96.2 (91.3 - 100.0) | 92.9 (91.1 - 94.7)          |
|                                      | 15-49    | 100.0 (96.7 - 100.0)   | 96.1 (92.3 - 99.8)  | 100.0 (100.0 - 100.0) | 96.0 (87.2 - 100.0)  |                      | 99.3 (93.7 - 100.0) | 93.9 (90.0 - 97.9)          |
|                                      | 50-64    | 93.3 (88.4 - 98.2)     | 96.8 (94.5 - 99.1)  | 98.2 (93.7 - 100.0)   | 96.0 (89.0 - 100.0)  |                      | 96.7 (91.9 - 100.0) | 94.4 (92.4 - 96.4)          |
|                                      | 65-79    | 98.6 (93.5 - 100.0)    | 92.7 (88.6 - 96.8)  | 95.7 (89.5 - 100.0)   | 91.0 (81.3 - 100.0)  |                      | 95.8 (90.3 - 100.0) | 95.0 (92.7 - 97.3)          |
|                                      | 80-99    | 83.2 (62.1 - 100.0)    | 83.3 (72.6 - 94.0)  | 95.3 (70.5 - 100.0)   | 59.9 (33.8 - 86.0)   |                      | 93.0 (72.6 - 100.0) | 84.1 (76.8 - 91.3)          |
| Stage II                             | All ages | 91.1 (85.5 - 96.7)     | 76.7 (73.2 - 80.3)  | 81.4 (76.0 - 86.9)    | 72.7 (64.4 - 81.0)   |                      | 81.4 (75.5 - 87.2)  | 76.5 (74.1 - 78.8)          |
|                                      | 15-49    | 98.9 (93.8 - 100.0)    | 84.9 (76.7 - 93.1)  | 85.0 (70.7 - 99.3)    | 94.5 (83.1 - 100.0)  |                      | 93.9 (80.3 - 100.0) | 84.7 (77.9 - 91.4)          |
|                                      | 50-64    | 95.5 (90.1 - 100.0)    | 85.9 (81.3 - 90.5)  | 87.1 (82.0 - 92.2)    | 81.2 (69.8 - 92.6)   |                      | 86.6 (79.3 - 94.0)  | 84.8 (81.9 - 87.7)          |
|                                      | 65-79    | 90.7 (82.6 - 98.8)     | 79.7 (74.2 - 85.2)  | 80.9 (73.6 - 88.3)    | 69.9 (56.9 - 82.9)   |                      | 87.4 (80.0 - 94.9)  | 79.3 (75.8 - 82.8)          |
|                                      | 80-99    | 78.3 (55.9 - 100.0)    | 55.3 (44.6 - 66.0)  | 76.1 (59.6 - 92.5)    | 49.9 (26.2 - 73.7)   |                      | 59.9 (41.6 - 78.1)  | 49.1 (43.4 - 54.8)          |
| Stage III                            | All ages | 74.2 (68.2 - 80.3)     | 73.1 (70.0 - 76.1)  | 76.1 (71.8 - 80.4)    | 67.9 (61.6 - 74.1)   |                      | 77.5 (70.9 - 84.1)  | 63.9 (61.9 - 65.9)          |
|                                      | 15-49    | 83.5 (72.4 - 94.5)     | 84.2 (78.9 - 89.6)  | 78.1 (67.2 - 89.1)    | 83.6 (73.7 - 93.5)   |                      | 89.0 (77.2 - 100.0) | 72.2 (72.8 - 81.6)          |
|                                      | 50-64    | 80.4 (72.5 - 88.2)     | 83.6 (80.0 - 87.1)  | 87.1 (82.0 - 92.2)    | 74.2 (66.4 - 82.0)   |                      | 84.0 (76.1 - 91.8)  | 76.6 (73.9 - 79.3)          |
|                                      | 65-79    | 76.2 (66.3 - 86.2)     | 72.6 (67.9 - 77.3)  | 76.2 (70.3 - 82.2)    | 74.8 (65.2 - 84.5)   |                      | 79.4 (69.7 - 89.1)  | 62.8 (59.8 - 65.9)          |
|                                      | 80-99    | 53.8 (35.8 - 71.8)     | 52.1 (42.2 - 62.0)  | 53.8 (36.9 - 70.7)    | 28.7 (12.4 - 45.0)   |                      | 52.3 (32.6 - 71.9)  | 34.1 (29.4 - 38.8)          |
| Stage IV                             | All ages | 21.9 (15.7 - 28.2)     | 14.7 (12.0 - 17.5)  | 24.8 (19.8 - 29.9)    | 11.2 (5.1 - 17.2)    |                      | 21.7 (17.1 - 26.3)  | 9.2 (7.4 - 11.1)            |
|                                      | 15-49    | 41.1 (24.4 - 57.7)     | 28.3 (17.9 - 38.6)  | 29.9 (12.0 - 47.7)    | 15.3 (0.0 - 37.4)    |                      | 35.6 (18.0 - 53.2)  | 18.0 (11.8 - 24.3)          |
|                                      | 50-64    | 28.7 (16.9 - 40.4)     | 19.7 (14.2 - 25.3)  | 30.5 (21.4 - 39.6)    | 13.6 (2.8 - 24.4)    |                      | 36.2 (26.7 - 45.8)  | 14.5 (10.7 - 18.4)          |
|                                      | 65-79    | 21.8 (10.8 - 32.8)     | 15.0 (10.2 - 19.7)  | 24.0 (17.2 - 30.8)    | 11.1 (2.1 - 20.1)    |                      | 17.0 (10.3 - 23.6)  | 6.7 (4.6 - 8.9)             |
|                                      | 80-99    | 1.4 (0.0 - 6.4)        | 2.0 (0.0 - 4.5)     | 12.5 (2.3 - 22.8)     | 3.0 (0.0 - 10.3)     |                      | 1.8 (0.0 - 5.0)     | 1.4 (0.4 - 2.5)             |
| <b>Mapped SEER stage<sup>2</sup></b> |          |                        |                     |                       |                      |                      |                     |                             |
| Localised                            | All ages | 90.3 (87.6 - 92.9)     | 91.0 (88.7 - 93.4)  | 94.5 (90.6 - 98.5)    | 83.8 (78.2 - 89.5)   | 97.6 (92.6 - 100.0)  | 91.3 (87.6 - 95.1)  | 86.4 (85.2 - 87.6)          |
|                                      | 15-49    | 99.2 (96.8 - 100.0)    | 95.8 (92.3 - 99.2)  | 98.2 (93.1 - 100.0)   | 95.1 (87.6 - 100.0)  | 100.0 (96.3 - 100.0) | 97.3 (91.9 - 100.0) | 90.9 (87.9 - 93.9)          |
|                                      | 50-64    | 92.7 (89.5 - 95.9)     | 95.7 (93.5 - 97.8)  | 95.1 (91.3 - 99.0)    | 90.7 (84.0 - 97.4)   | 96.6 (91.5 - 100.0)  | 94.4 (90.5 - 98.4)  | 91.1 (89.3 - 92.9)          |
|                                      | 65-79    | 94.0 (90.6 - 97.4)     | 90.8 (87.5 - 94.2)  | 92.2 (87.3 - 97.0)    | 86.8 (78.5 - 95.1)   | 98.4 (92.3 - 100.0)  | 94.5 (89.5 - 99.6)  | 89.0 (87.0 - 91.0)          |
|                                      | 80-99    | 73.7 (63.0 - 84.4)     | 81.1 (72.2 - 90.0)  | 93.9 (78.2 - 100.0)   | 61.8 (44.2 - 79.4)   | 96.0 (71.8 - 100.0)  | 76.4 (63.1 - 89.7)  | 67.9 (63.6 - 72.2)          |
| Regional                             | All ages | 74.1 (70.9 - 77.2)     | 72.9 (70.4 - 75.4)  | 72.5 (68.6 - 76.5)    | 66.0 (60.2 - 71.7)   | 73.4 (67.8 - 79.0)   | 74.2 (68.4 - 80.0)  | 62.6 (60.9 - 64.3)          |
|                                      | 15-49    | 82.1 (76.1 - 88.1)     | 82.6 (77.5 - 87.8)  | 75.3 (64.6 - 86.1)    | 84.8 (75.3 - 94.3)   | 87.9 (75.8 - 100.0)  | 88.3 (76.5 - 100.0) | 75.7 (71.4 - 79.9)          |
|                                      | 50-64    | 81.6 (77.4 - 85.7)     | 83.6 (80.2 - 86.9)  | 84.1 (79.1 - 89.1)    | 73.8 (66.4 - 81.2)   | 76.2 (67.7 - 84.7)   | 81.7 (74.1 - 89.3)  | 76.1 (73.6 - 78.5)          |
|                                      | 65-79    | 73.0 (68.0 - 78.0)     | 74.6 (70.6 - 78.6)  | 72.9 (67.2 - 78.5)    | 70.4 (60.8 - 79.9)   | 77.2 (68.9 - 85.4)   | 75.8 (66.3 - 85.3)  | 61.2 (58.2 - 64.2)          |
|                                      | 80-99    | 58.4 (47.3 - 69.5)     | 49.0 (41.5 - 56.5)  | 48.2 (33.2 - 63.3)    | 26.2 (11.8 - 40.5)   | 48.2 (30.1 - 66.3)   | 47.6 (28.9 - 66.2)  | 32.5 (28.4 - 36.5)          |
| Distant                              | All ages | 22.2 (18.1 - 26.4)     | 17.3 (14.5 - 20.1)  | 25.2 (20.2 - 30.2)    | 10.9 (5.1 - 16.6)    | 14.5 (7.9 - 21.1)    | 21.4 (16.7 - 26.1)  | 9.1 (7.6 - 10.6)            |
|                                      | 15-49    | 34.6 (24.1 - 45.1)     | 31.0 (21.9 - 40.1)  | 29.9 (12.2 - 47.6)    | 15.6 (0.0 - 37.4)    | 38.1 (16.7 - 59.6)   | 36.5 (19.4 - 53.7)  | 19.0 (13.0 - 25.1)          |
|                                      | 50-64    | 33.6 (25.1 - 42.1)     | 23.8 (18.3 - 29.3)  | 30.3 (21.3 - 39.4)    | 14.0 (3.5 - 24.5)    | 19.8 (5.6 - 34.0)    | 35.6 (26.4 - 44.9)  | 14.0 (10.0 - 18.1)          |
|                                      | 65-79    | 17.9 (11.4 - 24.4)     | 17.6 (12.6 - 22.6)  | 24.9 (17.9 - 31.9)    | 10.4 (2.2 - 18.6)    | 12.2 (3.0 - 21.3)    | 17.1 (10.3 - 23.9)  | 6.6 (4.7 - 8.4)             |
|                                      | 80-99    | 4.7 (0.0 - 9.7)        | 2.7 (0.3 - 5.1)     | 13.1 (2.8 - 23.5)     | 2.8 (0.0 - 9.6)      | 2.1 (0.0 - 8.5)      | 1.7 (0.0 - 4.6)     | 1.3 (0.3 - 2.2)             |

Abbreviation: NS = net survival, CI = confidence interval

All ages=Age-standardised

<sup>1</sup> Australia includes Victoria (Data on both TNM and SEER) and New South Wales (Data on SEER only)<sup>1</sup> Canada includes Alberta, British Columbia, New Brunswick, Manitoba, Newfoundland, Nova Scotia, Ontario, Prince Edward Island, and Saskatchewan; Ireland (2010-2013); United Kingdom includes England, Northern Ireland, Scotland, and Wales<sup>2</sup> Model1: Age spline with mapped SEER stage as time-dependent covariate<sup>2</sup> Model2: Age spline allowing separate models for each stage category



**Supplementary Table 8A.** Age-standardised and age-specific one-year net survival (%) by stage at diagnosis (without imputation, presenting results of those with missing stage information) and country for colon cancer patients diagnosed during 2010-2014

| Stage                                |          | Australia <sup>a</sup> | Canada <sup>a</sup> | Denmark            | Ireland <sup>a</sup>  | New Zealand           | Norway                | United Kingdom <sup>a</sup> |
|--------------------------------------|----------|------------------------|---------------------|--------------------|-----------------------|-----------------------|-----------------------|-----------------------------|
|                                      |          | 1-year NS (95% CI)     | 1-year NS (95% CI)  | 1-year NS (95% CI) | 1-year NS (95% CI)    | 1-year NS (95% CI)    | 1-year NS (95% CI)    | 1-year NS (95% CI)          |
| All patients <sup>b</sup>            | All ages | 87.5 (87.0 - 88.0)     | 84.2 (83.8 - 84.6)  | 82.7 (81.8 - 83.5) | 80.0 (78.9 - 81.0)    | 80.8 (79.9 - 81.8)    | 82.6 (81.8 - 83.4)    | 77.1 (76.8 - 77.4)          |
|                                      | 15-49    | 92.0 (90.6 - 93.2)     | 91.3 (90.2 - 92.3)  | 89.7 (86.5 - 92.2) | 90.9 (87.8 - 93.3)    | 84.8 (81.3 - 87.8)    | 89.3 (86.4 - 91.6)    | 86.7 (85.8 - 87.5)          |
|                                      | 50-64    | 91.4 (90.5 - 92.2)     | 88.9 (88.2 - 89.5)  | 87.1 (85.5 - 88.5) | 86.3 (84.3 - 88.0)    | 84.2 (82.2 - 86.0)    | 87.3 (85.7 - 88.7)    | 83.7 (83.2 - 84.3)          |
|                                      | 65-79    | 87.8 (87.1 - 88.5)     | 84.4 (83.8 - 85.0)  | 82.5 (81.4 - 83.6) | 80.4 (78.7 - 81.9)    | 82.8 (81.5 - 84.1)    | 83.2 (81.9 - 84.3)    | 77.7 (77.3 - 78.2)          |
|                                      | 80-99    | 76.9 (75.5 - 78.1)     | 71.4 (70.4 - 72.4)  | 69.4 (67.2 - 71.5) | 60.3 (57.4 - 63.2)    | 67.8 (65.5 - 70.0)    | 68.9 (66.9 - 70.9)    | 57.7 (57.1 - 58.3)          |
| <b>TNM Stage<sup>c</sup></b>         |          |                        |                     |                    |                       |                       |                       |                             |
| Stage I                              | All ages | 99.6 (97.5 - 99.9)     | 95.0 (94.5 - 95.5)  | 97.4 (95.7 - 98.4) | 97.9 (95.9 - 98.9)    |                       | 98.0 (96.6 - 98.8)    | 98.4 (98.0 - 98.7)          |
|                                      | 15-49    | 99.3 (93.3 - 99.9)     | 98.7 (97.3 - 99.4)  | 98.1 (85.8 - 99.8) | 100.0 (100.0 - 100.0) |                       | 100.0 (100.0 - 100.0) | 99.8 (98.1 - 100.0)         |
|                                      | 50-64    | 99.7 (95.4 - 100.0)    | 98.7 (98.0 - 99.2)  | 99.1 (94.6 - 99.8) | 99.4 (91.3 - 100.0)   |                       | 99.6 (89.7 - 100.0)   | 99.5 (98.8 - 99.8)          |
|                                      | 65-79    | 99.0 (96.8 - 99.7)     | 97.0 (96.1 - 97.7)  | 97.9 (95.4 - 99.0) | 98.5 (94.6 - 99.6)    |                       | 97.8 (95.3 - 99.0)    | 99.0 (98.3 - 99.4)          |
|                                      | 80-99    | 100.0 (100.0 - 100.0)  | 90.0 (87.9 - 91.8)  | 91.7 (83.9 - 95.8) | 91.8 (82.3 - 96.3)    |                       | 94.7 (88.9 - 97.5)    | 93.9 (92.1 - 95.3)          |
| Stage II                             | All ages | 98.4 (97.5 - 98.9)     | 95.0 (94.5 - 95.5)  | 94.1 (93.0 - 95.1) | 93.9 (92.5 - 95.1)    |                       | 97.1 (96.3 - 97.8)    | 94.7 (94.4 - 95.1)          |
|                                      | 15-49    | 100.0 (100.0 - 100.0)  | 98.1 (96.4 - 99.0)  | 98.8 (89.5 - 99.9) | 97.9 (91.2 - 99.5)    |                       | 100.0 (100.0 - 100.0) | 98.7 (97.8 - 99.3)          |
|                                      | 50-64    | 99.6 (96.8 - 99.9)     | 97.4 (96.5 - 98.0)  | 95.8 (93.4 - 97.3) | 98.3 (95.7 - 99.3)    |                       | 97.5 (97.4 - 99.9)    | 97.5 (96.9 - 98.0)          |
|                                      | 65-79    | 97.4 (95.8 - 98.4)     | 95.2 (94.4 - 96.0)  | 94.2 (92.5 - 95.4) | 93.2 (90.8 - 95.0)    |                       | 96.7 (95.2 - 97.7)    | 94.9 (94.3 - 95.4)          |
|                                      | 80-99    | 97.1 (93.6 - 98.7)     | 88.6 (87.0 - 90.1)  | 87.2 (83.6 - 90.1) | 84.3 (79.1 - 88.2)    |                       | 92.9 (89.7 - 95.1)    | 86.8 (85.7 - 87.9)          |
| Stage III                            | All ages | 93.7 (92.5 - 94.7)     | 90.7 (90.1 - 91.3)  | 90.6 (89.2 - 91.9) | 89.3 (87.5 - 90.8)    |                       | 92.4 (91.1 - 93.6)    | 88.6 (88.2 - 89.1)          |
|                                      | 15-49    | 95.7 (91.7 - 97.8)     | 97.7 (96.2 - 98.6)  | 96.0 (90.3 - 98.4) | 96.4 (91.4 - 98.6)    |                       | 99.3 (93.5 - 99.9)    | 95.9 (94.7 - 96.9)          |
|                                      | 50-64    | 97.6 (95.8 - 98.7)     | 94.8 (93.8 - 95.6)  | 94.7 (92.1 - 96.4) | 95.4 (92.7 - 97.1)    |                       | 95.8 (93.4 - 97.3)    | 93.8 (93.0 - 94.4)          |
|                                      | 65-79    | 93.2 (91.1 - 94.8)     | 90.6 (89.5 - 91.5)  | 92.2 (90.2 - 93.8) | 90.3 (87.6 - 92.5)    |                       | 93.0 (90.9 - 94.6)    | 88.9 (88.1 - 89.6)          |
|                                      | 80-99    | 86.1 (81.8 - 89.4)     | 79.4 (77.4 - 81.3)  | 75.3 (70.3 - 79.7) | 69.2 (62.9 - 74.7)    |                       | 81.6 (77.3 - 85.1)    | 73.7 (72.3 - 75.1)          |
| Stage IV                             | All ages | 59.4 (56.9 - 61.7)     | 49.5 (48.4 - 50.7)  | 54.8 (52.6 - 56.9) | 45.6 (42.8 - 48.3)    |                       | 53.4 (51.3 - 55.5)    | 42.8 (42.1 - 43.5)          |
|                                      | 15-49    | 71.7 (64.3 - 77.9)     | 68.8 (65.0 - 72.2)  | 70.8 (61.3 - 78.3) | 64.3 (53.5 - 73.2)    |                       | 66.7 (58.8 - 73.4)    | 57.4 (54.7 - 60.0)          |
|                                      | 50-64    | 69.6 (65.0 - 73.7)     | 60.7 (58.6 - 62.7)  | 65.3 (61.1 - 69.1) | 57.1 (51.8 - 62.0)    |                       | 63.7 (59.5 - 67.6)    | 53.3 (51.8 - 54.7)          |
|                                      | 65-79    | 58.4 (54.5 - 62.2)     | 46.3 (44.5 - 48.1)  | 51.6 (48.6 - 54.5) | 43.3 (39.3 - 47.3)    |                       | 52.3 (49.1 - 55.4)    | 40.2 (39.2 - 41.3)          |
|                                      | 80-99    | 34.2 (29.1 - 39.4)     | 24.3 (22.2 - 26.4)  | 31.2 (27.0 - 35.6) | 18.7 (14.3 - 23.5)    |                       | 28.0 (24.3 - 31.8)    | 20.3 (19.2 - 21.4)          |
| Missing                              | All ages | 78.4 (75.4 - 81.0)     | 71.1 (69.3 - 72.7)  | 81.6 (79.6 - 83.4) | 71.4 (67.0 - 75.3)    |                       | 71.0 (68.0 - 73.8)    | 71.6 (70.9 - 72.2)          |
|                                      | 15-49    | 97.3 (91.6 - 99.2)     | 93.5 (89.5 - 96.0)  | 91.1 (82.0 - 95.7) | 98.9 (91.1 - 99.9)    |                       | 88.0 (75.1 - 94.5)    | 89.2 (87.5 - 90.7)          |
|                                      | 50-64    | 92.8 (87.2 - 96.0)     | 87.9 (84.8 - 90.4)  | 89.2 (84.9 - 92.4) | 90.1 (78.5 - 95.6)    |                       | 87.8 (81.7 - 91.9)    | 82.2 (80.9 - 83.5)          |
|                                      | 65-79    | 77.0 (71.1 - 81.8)     | 68.4 (65.2 - 71.5)  | 79.3 (76.2 - 82.0) | 66.7 (58.7 - 73.5)    |                       | 67.6 (62.2 - 72.3)    | 70.2 (69.2 - 71.2)          |
|                                      | 80-99    | 50.8 (45.1 - 56.1)     | 38.6 (35.5 - 41.7)  | 65.6 (60.8 - 70.0) | 35.7 (28.7 - 42.7)    |                       | 39.8 (34.5 - 45.0)    | 44.2 (43.1 - 45.3)          |
| <b>Mapped SEER stage<sup>d</sup></b> |          |                        |                     |                    |                       |                       |                       |                             |
| Localised                            | All ages | 98.5 (98.0 - 98.9)     | 96.6 (96.2 - 96.9)  | 97.3 (96.5 - 98.0) | 97.1 (96.0 - 97.9)    | 98.8 (97.7 - 99.4)    | 97.7 (97.0 - 98.3)    | 97.1 (96.9 - 97.4)          |
|                                      | 15-49    | 99.5 (98.1 - 99.9)     | 98.8 (97.8 - 99.4)  | 99.1 (91.7 - 99.9) | 99.2 (92.2 - 99.9)    | 100.0 (100.0 - 100.0) | 100.0 (100.0 - 100.0) | 99.5 (98.9 - 99.7)          |
|                                      | 50-64    | 99.5 (98.6 - 99.8)     | 98.6 (98.0 - 99.0)  | 98.5 (96.8 - 99.3) | 99.7 (94.6 - 100.0)   | 99.9 (2.6 - 100.0)    | 99.7 (97.2 - 100.0)   | 98.9 (98.5 - 99.2)          |
|                                      | 65-79    | 98.7 (97.9 - 99.1)     | 96.9 (96.3 - 97.4)  | 97.2 (95.9 - 98.0) | 96.9 (95.0 - 98.1)    | 99.3 (96.6 - 99.8)    | 97.5 (96.3 - 98.3)    | 97.4 (97.0 - 97.8)          |
|                                      | 80-99    | 95.5 (93.6 - 96.9)     | 91.0 (89.5 - 92.3)  | 94.1 (90.7 - 96.3) | 90.6 (85.9 - 93.8)    | 95.1 (90.2 - 97.5)    | 93.9 (91.2 - 95.8)    | 91.4 (90.5 - 92.3)          |
| Regional                             | All ages | 94.7 (94.2 - 95.3)     | 91.6 (91.1 - 92.1)  | 88.8 (87.4 - 90.0) | 88.6 (87.1 - 90.0)    | 93.5 (92.4 - 94.4)    | 92.6 (91.4 - 93.6)    | 88.0 (87.6 - 88.4)          |
|                                      | 15-49    | 97.2 (95.5 - 98.3)     | 97.4 (96.1 - 98.2)  | 96.0 (91.1 - 98.2) | 96.5 (92.1 - 98.5)    | 97.0 (93.1 - 98.7)    | 99.4 (94.3 - 99.9)    | 96.1 (95.0 - 97.0)          |
|                                      | 50-64    | 97.6 (96.6 - 98.2)     | 95.4 (94.7 - 96.1)  | 93.2 (90.7 - 95.0) | 95.0 (92.5 - 96.6)    | 96.1 (94.1 - 97.5)    | 96.0 (93.8 - 97.4)    | 93.5 (92.8 - 94.2)          |
|                                      | 65-79    | 94.4 (93.4 - 95.2)     | 91.5 (90.7 - 92.3)  | 90.4 (88.5 - 91.9) | 89.2 (86.7 - 91.2)    | 94.0 (92.5 - 95.3)    | 92.8 (90.8 - 94.3)    | 88.0 (87.3 - 88.6)          |
|                                      | 80-99    | 88.5 (86.6 - 90.2)     | 81.4 (79.8 - 82.9)  | 71.5 (67.1 - 75.4) | 69.3 (63.9 - 74.0)    | 85.1 (81.7 - 87.9)    | 82.5 (78.6 - 85.8)    | 72.4 (71.1 - 73.6)          |
| Distant                              | All ages | 56.9 (55.3 - 58.4)     | 51.0 (49.9 - 52.1)  | 54.8 (52.6 - 56.9) | 45.6 (42.8 - 48.3)    | 46.4 (44.0 - 48.8)    | 53.4 (51.3 - 55.5)    | 42.9 (42.1 - 43.6)          |
|                                      | 15-49    | 72.0 (67.3 - 76.2)     | 69.9 (66.2 - 73.2)  | 70.8 (61.3 - 78.3) | 64.3 (53.5 - 73.2)    | 59.7 (51.7 - 66.8)    | 66.7 (58.8 - 73.4)    | 57.5 (54.8 - 60.2)          |
|                                      | 50-64    | 68.9 (66.0 - 71.7)     | 62.0 (60.0 - 64.0)  | 65.3 (61.1 - 69.1) | 57.1 (51.8 - 62.0)    | 53.7 (48.8 - 58.3)    | 63.7 (59.5 - 67.6)    | 53.3 (51.9 - 54.8)          |
|                                      | 65-79    | 53.8 (51.4 - 56.2)     | 47.9 (46.2 - 49.7)  | 51.6 (48.6 - 54.5) | 43.3 (39.3 - 47.3)    | 46.1 (42.5 - 49.6)    | 52.3 (49.1 - 55.4)    | 40.3 (39.2 - 41.3)          |
|                                      | 80-99    | 31.5 (28.4 - 34.6)     | 26.1 (24.1 - 28.2)  | 31.2 (27.0 - 35.6) | 18.7 (14.3 - 23.5)    | 25.6 (21.5 - 29.8)    | 28.0 (24.3 - 31.8)    | 20.2 (19.1 - 21.2)          |
| Missing                              | All ages | 81.2 (79.3 - 83.0)     | 68.9 (66.9 - 70.8)  | 81.6 (79.5 - 83.4) | 71.3 (66.9 - 75.2)    | 76.4 (73.2 - 79.3)    | 70.8 (67.8 - 73.6)    | 68.5 (67.8 - 69.3)          |
|                                      | 15-49    | 95.6 (91.3 - 97.8)     | 92.8 (87.9 - 95.8)  | 91.1 (82.0 - 95.7) | 98.9 (91.1 - 99.9)    | 90.0 (71.9 - 96.7)    | 87.2 (73.7 - 94.1)    | 85.9 (83.8 - 87.7)          |
|                                      | 50-64    | 92.9 (89.3 - 95.4)     | 85.8 (82.1 - 88.7)  | 89.2 (84.9 - 92.4) | 89.9 (78.2 - 95.5)    | 89.5 (82.6 - 93.8)    | 87.5 (81.4 - 91.7)    | 78.9 (77.3 - 80.3)          |
|                                      | 65-79    | 83.1 (79.6 - 86.0)     | 65.7 (62.1 - 69.1)  | 79.3 (76.2 - 82.0) | 66.5 (58.5 - 73.3)    | 76.3 (71.2 - 80.7)    | 67.5 (62.1 - 72.3)    | 67.1 (65.9 - 68.2)          |
|                                      | 80-99    | 54.2 (49.8 - 58.3)     | 37.3 (34.0 - 40.5)  | 65.4 (60.6 - 69.8) | 35.6 (28.6 - 42.7)    | 50.4 (44.9 - 55.6)    | 39.8 (34.5 - 45.0)    | 41.6 (40.5 - 42.8)          |

Abbreviation: NS = net survival, CI = confidence interval

All ages=Age-standardised

<sup>a</sup> Australia includes Victoria (Data on both TNM and SEER) and New South Wales (Data on SEER only)

<sup>b</sup> Canada includes Alberta, British Columbia, New Brunswick, Manitoba, Newfoundland, Nova Scotia, Ontario, Prince Edward Island, and Saskatchewan; Ireland (2010-2013); United Kingdom includes England, Northern Ireland, Scotland, and Wales

<sup>c</sup> Model1: Age spline with mapped SEER stage as time-dependent covariate

<sup>d</sup> Model2: Age spline allowing separate models for each stage category

**Supplementary Table 8B.** Age-standardised and age-specific five-year net survival (%) by stage at diagnosis (without imputation, presenting results of those with missing stage information) and country for colon cancer patients diagnosed during 2010-2014

| Stage                                |          | Australia <sup>†</sup> | Canada <sup>‡</sup> | Denmark               | Ireland <sup>§</sup> | New Zealand        | Norway                | United Kingdom <sup>¶</sup> |
|--------------------------------------|----------|------------------------|---------------------|-----------------------|----------------------|--------------------|-----------------------|-----------------------------|
|                                      |          | 5-year NS (95% CI)     | 5-year NS (95% CI)  | 5-year NS (95% CI)    | 5-year NS (95% CI)   | 5-year NS (95% CI) | 5-year NS (95% CI)    | 5-year NS (95% CI)          |
| All patients <sup>‡</sup>            | All ages | 70.9 (70.2 - 71.6)     | 70.8 (70.2 - 71.3)  | 65.5 (64.2 - 66.7)    | 60.9 (59.5 - 62.2)   | 62.1 (60.8 - 63.4) | 65.4 (64.2 - 66.5)    | 59.1 (58.7 - 59.4)          |
|                                      | 15-49    | 73.7 (71.5 - 75.8)     | 73.9 (72.3 - 75.5)  | 66.4 (61.8 - 70.6)    | 72.6 (68.4 - 76.4)   | 63.4 (58.9 - 67.5) | 69.2 (65.1 - 72.9)    | 67.1 (65.9 - 68.3)          |
|                                      | 50-64    | 73.0 (71.7 - 74.3)     | 72.8 (72.0 - 73.7)  | 66.8 (64.7 - 68.8)    | 65.4 (63.0 - 67.7)   | 63.2 (60.7 - 65.6) | 67.9 (65.7 - 69.9)    | 64.2 (63.5 - 64.8)          |
|                                      | 65-79    | 71.8 (70.7 - 72.8)     | 71.0 (70.2 - 71.8)  | 64.6 (62.9 - 66.2)    | 60.6 (58.6 - 62.6)   | 64.5 (62.7 - 66.3) | 65.3 (63.6 - 66.9)    | 60.6 (60.1 - 61.1)          |
|                                      | 80-99    | 63.4 (61.1 - 65.5)     | 64.6 (63.0 - 66.2)  | 64.6 (60.6 - 68.3)    | 44.7 (40.8 - 48.6)   | 53.3 (49.8 - 56.6) | 58.4 (55.2 - 61.5)    | 41.3 (40.5 - 42.2)          |
| <b>TNM Stage<sup>§</sup></b>         |          |                        |                     |                       |                      |                    |                       |                             |
| Stage I                              | All ages | 98.4 (95.0 - 99.5)     | 93.4 (92.0 - 94.5)  | 95.7 (91.0 - 98.0)    | 93.7 (90.0 - 96.1)   |                    | 95.9 (92.3 - 97.9)    | 96.2 (94.9 - 97.2)          |
|                                      | 15-49    | 97.1 (90.6 - 99.1)     | 95.8 (92.5 - 97.6)  | 91.9 (79.9 - 96.9)    | 95.3 (83.1 - 98.7)   |                    | 100.0 (100.0 - 100.0) | 97.4 (93.4 - 99.0)          |
|                                      | 50-64    | 96.6 (93.5 - 98.2)     | 95.4 (93.7 - 96.6)  | 93.7 (87.8 - 96.8)    | 95.5 (90.2 - 98.0)   |                    |                       | 98.2 (96.5 - 99.1)          |
|                                      | 65-79    | 96.4 (92.6 - 98.2)     | 94.8 (92.7 - 96.3)  | 94.6 (88.6 - 97.5)    | 94.6 (88.5 - 97.5)   |                    |                       | 97.3 (95.3 - 98.4)          |
|                                      | 80-99    | 100.0 (100.0 - 100.0)  | 85.3 (79.6 - 89.5)  | 100.0 (100.0 - 100.0) | 87.0 (67.9 - 95.1)   |                    |                       | 88.6 (82.2 - 92.8)          |
| Stage II                             | All ages | 91.0 (89.1 - 92.6)     | 87.6 (86.4 - 88.7)  | 89.8 (87.7 - 91.7)    | 86.4 (84.1 - 88.4)   |                    | 91.6 (89.7 - 93.1)    | 86.5 (85.6 - 87.4)          |
|                                      | 15-49    | 93.7 (87.9 - 96.8)     | 91.8 (88.0 - 94.4)  | 91.3 (82.9 - 95.7)    | 92.9 (85.8 - 96.6)   |                    | 94.4 (88.7 - 97.3)    | 89.5 (86.4 - 92.0)          |
|                                      | 50-64    | 88.4 (85.6 - 90.7)     | 89.7 (87.9 - 91.2)  | 89.0 (85.5 - 91.8)    | 91.4 (87.8 - 94.0)   |                    | 93.5 (90.6 - 95.6)    | 88.7 (87.2 - 90.0)          |
|                                      | 65-79    | 69.1 (65.6 - 72.3)     | 85.8 (84.0 - 87.4)  | 86.2 (83.3 - 88.6)    | 83.6 (80.1 - 86.6)   |                    | 90.7 (87.9 - 92.8)    | 85.7 (84.4 - 87.0)          |
|                                      | 80-99    | 89.8 (81.2 - 94.6)     | 85.5 (81.1 - 88.9)  | 97.6 (54.7 - 99.9)    | 79.1 (69.2 - 86.1)   |                    | 88.3 (80.6 - 93.1)    | 82.8 (79.5 - 85.6)          |
| Stage III                            | All ages | 71.5 (69.2 - 73.7)     | 70.5 (69.2 - 71.8)  | 73.9 (71.5 - 76.2)    | 66.3 (63.7 - 68.7)   |                    | 71.6 (69.2 - 73.9)    | 64.9 (63.9 - 65.9)          |
|                                      | 15-49    | 78.3 (71.6 - 83.6)     | 80.9 (77.3 - 83.9)  | 79.9 (71.3 - 86.2)    | 81.2 (74.1 - 86.5)   |                    | 76.9 (68.5 - 83.4)    | 74.7 (71.3 - 77.7)          |
|                                      | 50-64    | 77.3 (73.5 - 80.6)     | 76.4 (74.4 - 78.3)  | 76.8 (72.8 - 80.3)    | 73.7 (69.6 - 77.3)   |                    | 75.5 (69.8 - 79.9)    | 71.5 (69.8 - 73.2)          |
|                                      | 65-79    | 69.1 (65.6 - 72.3)     | 69.0 (67.0 - 70.9)  | 74.4 (71.0 - 77.5)    | 65.7 (61.8 - 69.3)   |                    | 69.6 (66.0 - 72.9)    | 64.4 (62.9 - 65.8)          |
|                                      | 80-99    | 62.1 (54.4 - 68.8)     | 56.9 (52.8 - 60.8)  | 63.1 (54.1 - 70.8)    | 40.1 (32.2 - 47.9)   |                    | 64.3 (56.9 - 70.8)    | 46.7 (43.7 - 49.7)          |
| Stage IV                             | All ages | 16.4 (14.5 - 18.3)     | 13.0 (12.1 - 13.9)  | 16.2 (14.6 - 17.9)    | 10.3 (8.8 - 11.8)    |                    | 16.6 (14.9 - 18.3)    | 10.3 (9.6 - 11.0)           |
|                                      | 15-49    | 26.2 (19.9 - 32.9)     | 21.5 (18.2 - 25.1)  | 19.9 (13.6 - 27.1)    | 16.5 (10.6 - 23.5)   |                    | 21.8 (15.8 - 28.4)    | 14.5 (11.7 - 17.5)          |
|                                      | 50-64    | 19.1 (15.8 - 22.7)     | 16.6 (14.9 - 18.4)  | 22.5 (19.3 - 25.9)    | 14.0 (11.1 - 17.3)   |                    | 22.4 (19.0 - 25.9)    | 14.0 (12.6 - 15.5)          |
|                                      | 65-79    | 15.8 (12.9 - 19.0)     | 11.4 (10.0 - 12.9)  | 12.9 (11.0 - 15.0)    | 8.7 (6.8 - 10.8)     |                    | 13.6 (11.4 - 16.0)    | 9.0 (8.1 - 9.9)             |
|                                      | 80-99    | 5.7 (3.3 - 9.1)        | 4.1 (2.8 - 5.6)     | 10.2 (7.0 - 14.1)     | 2.9 (1.2 - 5.7)      |                    | 9.0 (6.3 - 12.4)      | 3.5 (2.6 - 4.6)             |
| Missing                              | All ages | 59.1 (55.3 - 62.8)     | 54.8 (53.0 - 56.6)  | 69.8 (66.5 - 72.9)    | 55.4 (50.4 - 60.2)   |                    | 58.5 (54.7 - 62.0)    | 54.6 (54.0 - 55.3)          |
|                                      | 15-49    | 86.3 (76.9 - 92.1)     | 77.3 (72.6 - 81.3)  | 75.3 (61.2 - 84.9)    | 97.7 (87.8 - 99.6)   |                    | 86.4 (72.9 - 93.5)    | 71.6 (69.7 - 73.4)          |
|                                      | 50-64    | 77.1 (69.5 - 83.1)     | 71.3 (68.0 - 74.4)  | 77.3 (71.0 - 82.5)    | 79.5 (67.6 - 87.4)   |                    | 78.6 (70.9 - 84.4)    | 63.0 (61.7 - 64.3)          |
|                                      | 65-79    | 56.9 (50.3 - 63.0)     | 52.4 (49.2 - 55.5)  | 68.1 (63.6 - 72.2)    | 45.7 (37.8 - 53.2)   |                    | 52.1 (45.9 - 57.9)    | 54.7 (53.7 - 55.6)          |
|                                      | 80-99    | 25.9 (20.2 - 32.0)     | 24.2 (21.4 - 27.1)  | 54.6 (45.6 - 62.8)    | 11.3 (6.4 - 17.7)    |                    | 24.1 (18.0 - 30.9)    | 28.7 (27.7 - 29.7)          |
| <b>Mapped SEER stage<sup>§</sup></b> |          |                        |                     |                       |                      |                    |                       |                             |
| Localised                            | All ages | 95.7 (94.6 - 96.5)     | 92.6 (91.6 - 93.5)  | 96.0 (93.8 - 97.4)    | 92.4 (90.3 - 94.0)   | 95.9 (93.4 - 97.4) | 94.0 (92.3 - 95.3)    | 92.5 (91.8 - 93.2)          |
|                                      | 15-49    | 96.3 (93.9 - 97.7)     | 94.9 (92.3 - 96.6)  | 93.7 (87.1 - 97.0)    | 97.0 (90.9 - 99.0)   | 97.6 (89.7 - 99.5) | 97.8 (93.3 - 99.3)    | 94.2 (91.9 - 95.8)          |
|                                      | 50-64    | 96.4 (95.1 - 97.4)     | 94.4 (93.1 - 95.5)  | 94.0 (91.1 - 96.0)    | 95.9 (93.1 - 97.6)   | 95.9 (92.3 - 97.8) | 94.7 (92.2 - 96.4)    | 94.1 (93.1 - 95.0)          |
|                                      | 65-79    | 95.0 (93.5 - 96.1)     | 92.0 (90.5 - 93.3)  | 92.5 (89.8 - 94.5)    | 95.9 (93.1 - 97.6)   | 94.6 (91.2 - 96.7) | 92.6 (90.3 - 94.4)    | 92.3 (91.2 - 93.2)          |
|                                      | 80-99    | 95.5 (89.5 - 98.1)     | 89.3 (85.1 - 92.4)  | 100.0 (100.0 - 100.0) | 92.1 (88.9 - 94.3)   | 97.9 (41.5 - 99.9) | 93.0 (85.1 - 96.8)    | 88.8 (85.7 - 91.2)          |
| Regional                             | All ages | 78.1 (76.9 - 79.2)     | 75.2 (74.2 - 76.2)  | 72.5 (70.3 - 74.5)    | 67.5 (65.2 - 69.6)   | 75.8 (73.9 - 77.6) | 72.7 (70.5 - 74.9)    | 65.3 (64.4 - 66.2)          |
|                                      | 15-49    | 85.5 (82.3 - 88.2)     | 83.9 (81.0 - 86.4)  | 80.4 (72.8 - 86.1)    | 81.5 (75.3 - 86.3)   | 80.3 (74.1 - 85.1) | 77.8 (70.1 - 83.7)    | 75.7 (72.8 - 78.4)          |
|                                      | 50-64    | 81.9 (80.0 - 83.6)     | 80.0 (78.4 - 81.6)  | 75.5 (71.8 - 78.8)    | 74.2 (70.5 - 77.5)   | 77.9 (74.3 - 81.1) | 77.6 (73.7 - 80.9)    | 72.2 (70.7 - 73.7)          |
|                                      | 65-79    | 76.3 (74.5 - 77.9)     | 73.7 (72.1 - 75.2)  | 72.4 (69.4 - 75.2)    | 65.0 (61.6 - 68.3)   | 74.8 (72.1 - 77.3) | 70.7 (67.4 - 73.8)    | 64.4 (63.0 - 65.7)          |
|                                      | 80-99    | 70.4 (66.5 - 74.0)     | 64.6 (61.3 - 67.8)  | 60.9 (53.2 - 67.7)    | 48.8 (41.2 - 56.0)   | 70.2 (64.2 - 75.5) | 65.7 (58.8 - 71.8)    | 47.2 (44.6 - 49.8)          |
| Distant                              | All ages | 17.5 (16.3 - 18.8)     | 15.1 (14.2 - 16.1)  | 16.2 (14.6 - 17.9)    | 10.3 (8.8 - 11.8)    | 13.3 (11.6 - 15.1) | 16.6 (14.9 - 18.3)    | 10.2 (9.5 - 10.9)           |
|                                      | 15-49    | 25.3 (21.3 - 29.5)     | 23.6 (20.2 - 27.1)  | 19.9 (13.6 - 27.1)    | 16.5 (10.6 - 23.5)   | 19.8 (13.7 - 26.7) | 21.8 (15.8 - 28.4)    | 14.1 (11.3 - 17.1)          |
|                                      | 50-64    | 22.2 (19.8 - 24.6)     | 18.9 (17.2 - 20.7)  | 22.5 (19.3 - 25.9)    | 14.0 (11.1 - 17.3)   | 15.9 (12.6 - 19.6) | 22.4 (19.0 - 25.9)    | 13.8 (12.4 - 15.3)          |
|                                      | 65-79    | 15.7 (14.0 - 17.6)     | 13.9 (12.4 - 15.4)  | 12.9 (11.0 - 15.0)    | 8.7 (6.8 - 10.8)     | 11.9 (9.6 - 14.4)  | 13.6 (11.4 - 16.0)    | 9.0 (8.1 - 9.9)             |
|                                      | 80-99    | 8.0 (6.0 - 10.3)       | 5.4 (4.0 - 7.0)     | 10.2 (7.0 - 14.1)     | 2.9 (1.2 - 5.7)      | 6.8 (3.7 - 11.3)   | 9.0 (6.3 - 12.4)      | 3.5 (2.6 - 4.6)             |
| Missing                              | All ages | 64.8 (62.2 - 67.4)     | 52.6 (50.7 - 54.6)  | 69.9 (66.6 - 73.0)    | 55.4 (50.3 - 60.1)   | 48.7 (44.0 - 53.3) | 58.3 (54.5 - 61.9)    | 51.6 (50.9 - 52.2)          |
|                                      | 15-49    | 85.8 (79.6 - 90.1)     | 76.9 (71.5 - 81.3)  | 75.3 (61.2 - 84.9)    | 97.7 (87.8 - 99.6)   | 62.5 (39.2 - 79.0) | 85.6 (71.3 - 93.0)    | 67.7 (65.5 - 69.7)          |
|                                      | 50-64    | 79.1 (74.1 - 83.3)     | 68.4 (64.6 - 71.9)  | 77.3 (70.9 - 82.5)    | 79.3 (67.2 - 87.3)   | 58.2 (48.1 - 67.1) | 78.1 (70.4 - 84.1)    | 59.4 (58.0 - 60.8)          |
|                                      | 65-79    | 66.6 (62.0 - 70.7)     | 50.0 (46.5 - 53.4)  | 68.2 (63.7 - 72.4)    | 45.4 (37.5 - 53.0)   | 57.1 (49.5 - 64.0) | 52.0 (45.8 - 57.8)    | 51.6 (50.6 - 52.6)          |
|                                      | 80-99    | 31.6 (26.6 - 36.8)     | 22.7 (19.8 - 25.6)  | 54.8 (45.7 - 63.0)    | 11.1 (6.2 - 17.6)    | 15.2 (10.2 - 21.1) | 24.1 (18.0 - 30.9)    | 26.6 (25.6 - 27.6)          |

Abbreviation: NS = net survival, CI = confidence interval

All ages=Age-standardised

<sup>†</sup>Australia includes Victoria (Data on both TNM and SEER) and New South Wales (Data on SEER only)

<sup>‡</sup>Canada includes Alberta, British Columbia, New Brunswick, Manitoba, Newfoundland, Nova Scotia, Ontario, Prince Edward Island, and Saskatchewan; Ireland (2010-2013); United Kingdom includes England, Northern Ireland, Scotland, and Wales

<sup>§</sup>Model1: Age spline with mapped SEER stage as time-dependent covariate

<sup>¶</sup>Model2: Age spline allowing separate models for each stage category

**Supplementary Table 9A.** Age-standardised and age-specific one-year net survival (%) by stage at diagnosis (without imputation, presenting results of those with missing stage information) and country for rectal cancer patients diagnosed during 2010-2014

| Stage                                |          | Australia <sup>a</sup> | Canada <sup>a</sup>   | Denmark               | Ireland <sup>b</sup>  | New Zealand           | Norway                | United Kingdom <sup>c</sup> |
|--------------------------------------|----------|------------------------|-----------------------|-----------------------|-----------------------|-----------------------|-----------------------|-----------------------------|
|                                      |          | 1-year NS (95% CI)     | 1-year NS (95% CI)    | 1-year NS (95% CI)    | 1-year NS (95% CI)    | 1-year NS (95% CI)    | 1-year NS (95% CI)    | 1-year NS (95% CI)          |
| All patients <sup>d</sup>            | All ages | 90.0 (89.2 - 90.7)     | 87.3 (86.7 - 87.9)    | 87.5 (86.5 - 88.5)    | 86.3 (84.6 - 87.8)    | 85.9 (84.5 - 87.3)    | 89.1 (88.0 - 90.2)    | 84.8 (84.4 - 85.2)          |
|                                      | 15-49    | 95.9 (94.3 - 97.1)     | 94.9 (93.6 - 95.9)    | 92.7 (88.8 - 95.3)    | 96.5 (92.5 - 98.4)    | 90.4 (86.0 - 93.4)    | 92.6 (88.8 - 95.2)    | 90.6 (89.4 - 91.7)          |
|                                      | 50-64    | 94.0 (93.0 - 95.0)     | 91.9 (91.1 - 92.7)    | 92.1 (90.5 - 93.5)    | 90.6 (88.2 - 92.5)    | 91.3 (89.0 - 93.1)    | 94.5 (92.9 - 95.8)    | 90.9 (90.3 - 91.5)          |
|                                      | 65-79    | 89.4 (88.1 - 90.5)     | 87.6 (86.6 - 88.5)    | 87.7 (86.2 - 89.0)    | 87.2 (84.7 - 89.3)    | 85.6 (83.3 - 87.6)    | 90.4 (88.7 - 91.8)    | 84.9 (84.3 - 85.4)          |
|                                      | 80-99    | 80.2 (77.4 - 82.7)     | 74.2 (72.0 - 76.2)    | 73.3 (69.7 - 76.5)    | 69.0 (63.2 - 74.1)    | 74.2 (69.3 - 78.4)    | 75.0 (71.1 - 78.5)    | 69.8 (68.6 - 70.9)          |
| <b>TNM Stage<sup>e</sup></b>         |          |                        |                       |                       |                       |                       |                       |                             |
| Stage I                              | All ages | 99.0 (96.8 - 99.7)     | 93.7 (92.4 - 94.8)    | 97.6 (95.6 - 98.7)    | 98.0 (94.2 - 99.3)    |                       | 100.0 (100.0 - 100.0) | 98.4 (97.9 - 98.8)          |
|                                      | 15-49    | 100.0 (100.0 - 100.0)  | 100.0 (100.0 - 100.0) | 100.0 (100.0 - 100.0) | 100.0 (100.0 - 100.0) |                       | 100.0 (100.0 - 100.0) | 99.1 (97.1 - 99.7)          |
|                                      | 50-64    | 99.8 (78.4 - 100.0)    | 99.7 (97.5 - 99.4)    | 99.3 (92.9 - 99.9)    | 99.8 (0.2 - 100.0)    |                       | 100.0 (100.0 - 100.0) | 99.2 (98.5 - 99.6)          |
|                                      | 65-79    | 97.2 (94.2 - 98.7)     | 96.5 (94.9 - 97.6)    | 97.4 (94.3 - 98.8)    | 97.1 (90.9 - 99.1)    |                       | 99.9 (0.0 - 100.0)    | 98.6 (97.7 - 99.1)          |
|                                      | 80-99    | 100.0 (100.0 - 100.0)  | 89.8 (85.4 - 92.9)    | 92.8 (80.7 - 97.4)    | 96.1 (68.4 - 99.6)    |                       | 100.0 (100.0 - 100.0) | 95.9 (93.4 - 97.5)          |
| Stage II                             | All ages | 99.2 (95.6 - 99.8)     | 93.7 (92.4 - 94.8)    | 94.1 (92.3 - 95.5)    | 92.4 (88.9 - 94.8)    |                       | 98.4 (96.1 - 99.4)    | 93.8 (93.1 - 94.5)          |
|                                      | 15-49    | 100.0 (100.0 - 100.0)  | 99.0 (95.1 - 99.8)    | 98.2 (85.4 - 99.8)    | 96.1 (74.0 - 99.5)    |                       | 100.0 (100.0 - 100.0) | 98.8 (96.5 - 99.6)          |
|                                      | 50-64    | 98.7 (94.0 - 99.7)     | 95.8 (94.0 - 97.1)    | 96.0 (92.7 - 97.8)    | 93.6 (86.8 - 96.9)    |                       | 100.0 (0.0 - 100.0)   | 97.4 (96.3 - 98.2)          |
|                                      | 65-79    | 99.3 (88.1 - 100.0)    | 93.7 (91.7 - 95.3)    | 94.8 (92.1 - 96.6)    | 92.0 (86.7 - 95.2)    |                       | 97.8 (93.7 - 99.3)    | 92.7 (91.5 - 93.8)          |
|                                      | 80-99    | 98.9 (11.1 - 100.0)    | 86.3 (81.5 - 90.0)    | 84.0 (76.1 - 89.5)    | 88.7 (73.5 - 95.4)    |                       | 96.0 (83.2 - 99.1)    | 86.1 (83.4 - 88.3)          |
| Stage III                            | All ages | 96.9 (94.5 - 98.3)     | 93.6 (92.5 - 94.4)    | 93.9 (92.2 - 95.2)    | 91.7 (89.1 - 93.6)    |                       | 98.2 (95.8 - 99.3)    | 92.2 (91.5 - 92.7)          |
|                                      | 15-49    | 100.0 (100.0 - 100.0)  | 98.3 (96.6 - 99.2)    | 97.9 (90.9 - 99.5)    | 100.0 (100.0 - 100.0) |                       | 100.0 (100.0 - 100.0) | 95.4 (93.7 - 96.6)          |
|                                      | 50-64    | 97.7 (94.1 - 99.1)     | 96.5 (95.4 - 97.3)    | 97.8 (95.4 - 99.0)    | 96.2 (93.2 - 97.9)    |                       | 99.5 (91.3 - 100.0)   | 96.2 (95.4 - 96.9)          |
|                                      | 65-79    | 96.6 (92.4 - 98.5)     | 93.6 (92.0 - 94.8)    | 93.6 (91.1 - 95.4)    | 93.3 (89.5 - 95.8)    |                       | 99.2 (90.3 - 99.9)    | 91.8 (90.8 - 92.6)          |
|                                      | 80-99    | 94.3 (82.4 - 98.3)     | 85.2 (81.0 - 88.5)    | 82.8 (74.7 - 88.5)    | 71.6 (60.5 - 80.1)    |                       | 92.5 (81.4 - 97.1)    | 82.9 (80.6 - 85.1)          |
| Stage IV                             | All ages | 68.9 (64.1 - 73.2)     | 57.1 (55.0 - 59.2)    | 63.7 (60.3 - 67.0)    | 58.6 (53.4 - 63.5)    |                       | 64.4 (60.5 - 68.1)    | 54.5 (53.2 - 55.8)          |
|                                      | 15-49    | 85.6 (75.4 - 91.8)     | 76.3 (70.5 - 81.1)    | 71.5 (56.7 - 82.0)    | 82.7 (65.4 - 91.9)    |                       | 79.0 (67.1 - 87.0)    | 67.4 (62.9 - 71.5)          |
|                                      | 50-64    | 78.5 (70.7 - 84.4)     | 67.9 (64.5 - 71.1)    | 72.3 (66.5 - 77.4)    | 68.0 (59.7 - 74.9)    |                       | 79.3 (73.0 - 84.3)    | 65.5 (63.1 - 67.7)          |
|                                      | 65-79    | 68.8 (60.9 - 75.5)     | 54.6 (51.1 - 58.0)    | 63.6 (59.1 - 67.8)    | 56.4 (48.1 - 64.0)    |                       | 65.0 (58.8 - 70.5)    | 52.2 (50.2 - 54.1)          |
|                                      | 80-99    | 41.5 (29.6 - 53.1)     | 32.9 (28.0 - 37.9)    | 36.8 (29.1 - 44.6)    | 30.7 (19.3 - 42.8)    |                       | 32.7 (24.2 - 41.5)    | 31.7 (29.0 - 34.3)          |
| Missing                              | All ages | 83.7 (80.4 - 86.4)     | 80.3 (78.0 - 82.4)    | 86.2 (83.6 - 88.4)    | 82.1 (76.1 - 86.7)    |                       | 84.1 (81.5 - 86.3)    | 80.5 (79.6 - 81.3)          |
|                                      | 15-49    | 95.3 (87.7 - 98.3)     | 97.7 (93.6 - 99.2)    | 92.7 (78.5 - 97.6)    | 100.0 (100.0 - 100.0) |                       | 91.4 (82.5 - 95.8)    | 91.5 (88.8 - 93.5)          |
|                                      | 50-64    | 92.2 (87.0 - 95.4)     | 90.9 (87.8 - 93.2)    | 93.0 (88.6 - 95.7)    | 93.3 (81.9 - 97.7)    |                       | 94.7 (91.1 - 96.9)    | 89.8 (88.3 - 91.1)          |
|                                      | 65-79    | 78.1 (71.7 - 83.3)     | 79.5 (75.1 - 83.3)    | 85.2 (81.3 - 88.3)    | 84.1 (73.4 - 90.7)    |                       | 86.2 (82.2 - 89.3)    | 79.5 (78.0 - 81.0)          |
|                                      | 80-99    | 66.5 (57.5 - 74.0)     | 58.1 (52.4 - 63.3)    | 71.8 (64.3 - 78.0)    | 47.4 (32.0 - 61.3)    |                       | 58.0 (50.2 - 64.9)    | 58.4 (56.2 - 60.5)          |
| <b>Mapped SEER stage<sup>f</sup></b> |          |                        |                       |                       |                       |                       |                       |                             |
| Localised                            | All ages | 97.3 (96.3 - 98.0)     | 96.5 (95.7 - 97.1)    | 96.9 (95.6 - 97.8)    | 96.3 (94.0 - 97.7)    | 98.8 (94.9 - 99.7)    | 99.5 (97.3 - 99.9)    | 96.9 (96.5 - 97.3)          |
|                                      | 15-49    | 100.0 (100.0 - 100.0)  | 99.9 (83.3 - 100.0)   | 99.0 (90.4 - 99.9)    | 98.0 (84.9 - 99.8)    | 100.0 (100.0 - 100.0) | 100.0 (100.0 - 100.0) | 99.1 (97.9 - 99.6)          |
|                                      | 50-64    | 98.7 (97.4 - 99.3)     | 98.5 (97.6 - 99.1)    | 98.3 (96.1 - 99.2)    | 97.3 (93.4 - 98.9)    | 99.9 (0.0 - 100.0)    | 100.0 (100.0 - 100.0) | 98.6 (98.0 - 99.0)          |
|                                      | 65-79    | 96.8 (95.3 - 97.8)     | 96.3 (95.0 - 97.2)    | 96.9 (95.0 - 98.1)    | 96.3 (92.7 - 98.1)    | 99.7 (0.1 - 100.0)    | 99.3 (95.6 - 99.9)    | 96.8 (96.1 - 97.3)          |
|                                      | 80-99    | 93.9 (89.5 - 96.5)     | 90.9 (87.5 - 93.4)    | 91.7 (85.0 - 95.5)    | 93.2 (82.0 - 97.5)    | 94.2 (77.9 - 98.6)    | 98.5 (82.3 - 99.9)    | 92.7 (91.0 - 94.1)          |
| Regional                             | All ages | 96.0 (94.9 - 96.9)     | 92.9 (92.0 - 93.7)    | 92.6 (90.9 - 93.9)    | 90.9 (88.5 - 92.9)    | 95.4 (92.9 - 97.0)    | 98.0 (95.8 - 99.1)    | 91.4 (90.8 - 92.0)          |
|                                      | 15-49    | 99.5 (97.0 - 99.9)     | 98.4 (96.8 - 99.2)    | 98.1 (91.9 - 99.6)    | 100.0 (100.0 - 100.0) | 95.9 (83.9 - 99.0)    | 100.0 (100.0 - 100.0) | 95.2 (93.6 - 96.4)          |
|                                      | 50-64    | 97.7 (96.2 - 98.6)     | 95.9 (94.8 - 96.7)    | 96.7 (94.3 - 98.1)    | 95.9 (93.0 - 97.6)    | 96.8 (92.0 - 98.8)    | 99.6 (90.3 - 100.0)   | 96.0 (95.3 - 96.7)          |
|                                      | 65-79    | 95.3 (93.4 - 96.6)     | 93.1 (91.8 - 94.3)    | 92.8 (90.4 - 94.6)    | 91.5 (87.7 - 94.1)    | 95.5 (91.6 - 97.6)    | 98.4 (93.8 - 99.6)    | 90.9 (90.0 - 91.8)          |
|                                      | 80-99    | 92.5 (87.4 - 95.6)     | 83.9 (80.4 - 86.8)    | 78.9 (71.8 - 84.5)    | 72.6 (62.1 - 80.7)    | 91.6 (80.4 - 96.6)    | 93.2 (82.6 - 97.5)    | 80.9 (78.7 - 83.0)          |
| Distant                              | All ages | 62.7 (59.6 - 65.6)     | 58.3 (56.2 - 60.3)    | 63.7 (60.3 - 67.0)    | 58.6 (53.4 - 63.5)    | 46.7 (41.7 - 51.5)    | 64.4 (60.5 - 68.1)    | 54.6 (53.3 - 55.9)          |
|                                      | 15-49    | 81.5 (74.3 - 86.8)     | 77.2 (71.8 - 81.7)    | 71.5 (56.7 - 82.0)    | 82.7 (65.4 - 91.9)    | 68.4 (54.7 - 78.8)    | 79.0 (67.1 - 87.0)    | 67.6 (63.0 - 71.7)          |
|                                      | 50-64    | 74.4 (69.5 - 78.7)     | 69.3 (66.1 - 72.3)    | 72.3 (66.5 - 77.4)    | 68.0 (59.7 - 74.9)    | 60.6 (50.9 - 69.0)    | 79.3 (73.0 - 84.3)    | 65.4 (63.0 - 67.7)          |
|                                      | 65-79    | 59.8 (54.7 - 64.5)     | 55.8 (52.4 - 59.1)    | 63.6 (59.1 - 67.8)    | 56.4 (48.1 - 64.0)    | 35.4 (28.2 - 42.6)    | 65.0 (58.8 - 70.5)    | 52.2 (50.2 - 54.2)          |
|                                      | 80-99    | 37.3 (30.1 - 44.6)     | 33.9 (29.2 - 38.8)    | 36.8 (29.1 - 44.6)    | 30.7 (19.3 - 42.8)    | 35.8 (25.0 - 46.7)    | 32.7 (24.2 - 41.5)    | 32.1 (29.4 - 34.8)          |
| Missing                              | All ages | 85.8 (83.4 - 87.8)     | 74.3 (70.9 - 77.3)    | 86.2 (83.6 - 88.3)    | 82.1 (76.1 - 86.7)    | 89.3 (87.2 - 91.1)    | 84.0 (81.5 - 86.3)    | 78.3 (77.3 - 79.3)          |
|                                      | 15-49    | 96.5 (92.2 - 98.5)     | 99.1 (92.1 - 99.9)    | 92.7 (78.5 - 97.6)    | 100.0 (100.0 - 100.0) | 96.3 (91.0 - 98.5)    | 91.4 (82.5 - 95.8)    | 90.6 (87.6 - 92.9)          |
|                                      | 50-64    | 94.1 (90.8 - 96.2)     | 88.7 (84.0 - 92.1)    | 93.0 (88.6 - 95.7)    | 93.3 (81.9 - 97.7)    | 95.3 (92.5 - 97.1)    | 94.7 (91.1 - 96.9)    | 88.3 (86.6 - 89.8)          |
|                                      | 65-79    | 82.4 (78.0 - 85.9)     | 71.0 (64.4 - 76.6)    | 85.1 (81.2 - 88.2)    | 84.1 (73.4 - 90.7)    | 90.3 (87.1 - 92.7)    | 86.1 (82.2 - 89.2)    | 76.8 (75.1 - 78.4)          |
|                                      | 80-99    | 67.8 (60.6 - 73.9)     | 49.4 (42.9 - 55.6)    | 71.8 (64.3 - 78.0)    | 47.4 (32.0 - 61.3)    | 71.7 (64.0 - 78.1)    | 57.9 (50.2 - 64.9)    | 55.5 (53.2 - 57.7)          |

Abbreviation: NS = net survival, CI = confidence interval

All ages=Age-standardised

<sup>a</sup> Australia includes Victoria (Data on both TNM and SEER) and New South Wales (Data on SEER only)

<sup>b</sup> Canada includes Alberta, British Columbia, New Brunswick, Manitoba, Newfoundland, Nova Scotia, Ontario, Prince Edward Island, and Saskatchewan; Ireland (2010-2013); United Kingdom includes England, Northern Ireland, Scotland, and Wales

<sup>c</sup> Model1: Age spline with mapped SEER stage as time-dependent covariate

<sup>d</sup> Model2: Age spline allowing separate models for each stage category

**Supplementary Table 9B.** Age-standardised and age-specific five-year net survival (%) by stage at diagnosis (without imputation, presenting results of those with missing stage information) and country for rectal cancer patients diagnosed during 2010-2014

| Stage                                |          | Australia <sup>1</sup> | Canada <sup>1</sup> | Denmark            | Ireland <sup>1</sup> | New Zealand           | Norway                | United Kingdom <sup>1</sup> |
|--------------------------------------|----------|------------------------|---------------------|--------------------|----------------------|-----------------------|-----------------------|-----------------------------|
|                                      |          | 5-year NS (95% CI)     | 5-year NS (95% CI)  | 5-year NS (95% CI) | 5-year NS (95% CI)   | 5-year NS (95% CI)    | 5-year NS (95% CI)    | 5-year NS (95% CI)          |
| All patients <sup>1</sup>            | All ages | 70.8 (69.6 - 72.0)     | 70.9 (69.9 - 71.8)  | 69.1 (67.4 - 70.8) | 61.6 (59.3 - 63.7)   | 65.4 (63.1 - 67.5)    | 68.8 (66.9 - 70.6)    | 62.1 (61.5 - 62.6)          |
|                                      | 15-49    | 77.9 (75.0 - 80.5)     | 78.2 (76.0 - 80.2)  | 73.1 (67.5 - 77.9) | 73.1 (67.1 - 78.2)   | 71.8 (65.8 - 76.9)    | 75.7 (70.1 - 80.4)    | 68.9 (67.1 - 70.6)          |
|                                      | 50-64    | 75.4 (73.7 - 77.1)     | 76.5 (75.3 - 77.7)  | 74.8 (72.3 - 77.1) | 66.0 (62.7 - 69.1)   | 71.0 (67.5 - 74.2)    | 73.0 (70.1 - 75.6)    | 70.1 (69.2 - 70.9)          |
|                                      | 65-79    | 70.5 (68.6 - 72.3)     | 71.7 (70.3 - 73.1)  | 68.3 (66.0 - 70.5) | 63.1 (59.7 - 66.3)   | 65.1 (61.9 - 68.2)    | 71.8 (69.1 - 74.3)    | 63.4 (62.6 - 64.3)          |
|                                      | 80-99    | 58.2 (53.8 - 62.3)     | 55.2 (51.9 - 58.3)  | 56.7 (50.6 - 62.4) | 41.4 (34.3 - 48.2)   | 51.7 (43.8 - 58.9)    | 51.2 (45.2 - 56.9)    | 39.3 (37.7 - 40.8)          |
| <b>TNM Stage<sup>2</sup></b>         |          |                        |                     |                    |                      |                       |                       |                             |
| Stage I                              | All ages | 97.5 (92.6 - 99.2)     | 91.1 (88.7 - 93.0)  | 93.5 (88.4 - 96.4) | 90.0 (84.1 - 93.8)   |                       | 97.9 (90.7 - 99.6)    | 94.2 (92.6 - 95.5)          |
|                                      | 15-49    | 99.6 (43.2 - 100.0)    | 96.4 (91.3 - 98.5)  | 95.6 (77.3 - 99.2) | 94.6 (76.2 - 98.9)   |                       | 98.8 (75.6 - 99.9)    | 97.1 (93.5 - 98.7)          |
|                                      | 50-64    | 94.7 (90.8 - 97.0)     | 95.5 (92.9 - 97.2)  | 97.3 (89.8 - 99.3) | 99.2 (46.0 - 100.0)  |                       | 98.4 (90.3 - 99.7)    | 94.4 (92.4 - 95.9)          |
|                                      | 65-79    | 95.3 (89.6 - 97.9)     | 91.5 (87.9 - 94.0)  | 93.5 (86.9 - 96.8) | 85.2 (76.6 - 90.8)   |                       | 95.6 (88.7 - 98.3)    | 94.2 (91.9 - 95.9)          |
|                                      | 80-99    | 100.0 (100.0 - 100.0)  | 78.5 (68.5 - 85.7)  | 83.5 (58.7 - 94.1) | 80.5 (51.9 - 93.1)   |                       | 100.0 (100.0 - 100.0) | 92.5 (82.0 - 97.0)          |
| Stage II                             | All ages | 89.1 (84.7 - 92.2)     | 78.7 (76.1 - 81.1)  | 83.4 (79.8 - 86.5) | 74.8 (69.7 - 79.3)   |                       | 87.5 (83.1 - 90.9)    | 77.4 (75.5 - 79.2)          |
|                                      | 15-49    | 91.4 (79.2 - 96.6)     | 84.3 (77.8 - 89.0)  | 83.8 (70.2 - 91.5) | 91.4 (72.7 - 97.5)   |                       | 96.1 (81.2 - 99.2)    | 83.9 (77.5 - 88.7)          |
|                                      | 50-64    | 88.4 (81.8 - 92.7)     | 84.8 (81.5 - 87.6)  | 88.1 (83.2 - 91.7) | 79.5 (71.0 - 85.8)   |                       | 86.4 (79.9 - 90.9)    | 83.2 (80.3 - 85.7)          |
|                                      | 65-79    | 68.7 (62.1 - 74.4)     | 81.3 (77.6 - 84.5)  | 83.5 (78.7 - 87.4) | 73.9 (66.4 - 80.0)   |                       | 89.9 (83.2 - 94.1)    | 78.9 (76.2 - 81.3)          |
|                                      | 80-99    | 95.3 (29.8 - 99.8)     | 58.2 (48.7 - 66.6)  | 75.6 (60.4 - 85.6) | 57.2 (39.0 - 71.9)   |                       | 79.9 (61.3 - 90.2)    | 56.3 (48.9 - 63.1)          |
| Stage III                            | All ages | 72.0 (67.7 - 75.8)     | 71.5 (69.3 - 73.6)  | 75.9 (72.9 - 78.6) | 67.8 (63.9 - 71.4)   |                       | 79.9 (75.5 - 83.6)    | 65.9 (64.3 - 67.5)          |
|                                      | 15-49    | 76.3 (66.5 - 83.7)     | 82.0 (77.6 - 85.7)  | 78.2 (69.3 - 84.8) | 82.5 (73.7 - 88.6)   |                       | 87.7 (73.6 - 94.5)    | 74.1 (69.7 - 78.0)          |
|                                      | 50-64    | 76.9 (71.0 - 81.8)     | 78.2 (75.5 - 80.7)  | 83.7 (79.7 - 87.0) | 75.3 (70.4 - 79.6)   |                       | 80.5 (73.9 - 85.6)    | 74.4 (72.0 - 76.6)          |
|                                      | 65-79    | 68.7 (62.1 - 74.4)     | 72.8 (69.4 - 75.8)  | 75.9 (71.7 - 79.6) | 68.5 (62.5 - 73.7)   |                       | 80.3 (73.5 - 85.5)    | 65.4 (63.0 - 67.8)          |
|                                      | 80-99    | 69.2 (52.2 - 81.2)     | 50.7 (42.4 - 58.5)  | 57.3 (44.2 - 68.4) | 41.0 (28.2 - 53.4)   |                       | 71.2 (52.4 - 83.7)    | 44.1 (38.5 - 49.6)          |
| Stage IV                             | All ages | 21.2 (17.4 - 25.2)     | 14.4 (12.7 - 16.3)  | 23.1 (20.1 - 26.3) | 11.3 (8.6 - 14.4)    |                       | 20.6 (17.6 - 23.8)    | 11.3 (10.0 - 12.8)          |
|                                      | 15-49    | 35.5 (24.3 - 46.8)     | 26.6 (20.3 - 33.2)  | 32.1 (20.5 - 44.2) | 14.8 (6.5 - 26.4)    |                       | 35.3 (23.9 - 46.9)    | 21.9 (16.1 - 28.3)          |
|                                      | 50-64    | 24.5 (18.2 - 31.3)     | 17.2 (14.3 - 20.4)  | 27.6 (22.6 - 32.8) | 13.6 (9.2 - 18.8)    |                       | 28.5 (22.9 - 34.3)    | 14.3 (11.6 - 17.3)          |
|                                      | 65-79    | 22.5 (16.1 - 29.7)     | 13.3 (10.5 - 16.4)  | 19.6 (15.8 - 23.7) | 10.3 (6.4 - 15.2)    |                       | 19.1 (14.4 - 24.2)    | 9.6 (7.8 - 11.7)            |
|                                      | 80-99    | 4.1 (0.6 - 13.7)       | 5.5 (2.7 - 9.6)     | 11.1 (5.2 - 19.5)  | 4.9 (1.0 - 13.8)     |                       | 4.1 (1.2 - 9.8)       | 3.1 (1.7 - 5.3)             |
| Missing                              | All ages | 60.8 (56.5 - 64.7)     | 61.6 (59.1 - 64.1)  | 72.5 (67.3 - 77.0) | 58.5 (51.7 - 64.6)   |                       | 61.0 (57.1 - 64.6)    | 58.3 (57.4 - 59.1)          |
|                                      | 15-49    | 84.9 (75.4 - 91.0)     | 85.5 (80.6 - 89.3)  | 85.6 (66.1 - 94.3) | 85.7 (69.8 - 93.6)   |                       | 79.9 (67.9 - 87.9)    | 69.6 (66.7 - 72.3)          |
|                                      | 50-64    | 74.4 (67.8 - 79.8)     | 78.5 (75.0 - 81.6)  | 81.1 (73.4 - 86.7) | 67.4 (55.3 - 76.9)   |                       | 77.3 (71.6 - 82.1)    | 69.3 (67.8 - 70.8)          |
|                                      | 65-79    | 57.4 (50.1 - 64.0)     | 59.3 (54.8 - 63.5)  | 67.0 (60.1 - 73.0) | 63.1 (51.6 - 72.7)   |                       | 66.0 (60.4 - 71.1)    | 57.9 (56.4 - 59.3)          |
|                                      | 80-99    | 25.0 (16.7 - 34.2)     | 30.2 (25.2 - 35.4)  | 57.0 (41.8 - 69.6) | 16.1 (6.7 - 29.0)    |                       | 16.9 (10.1 - 25.2)    | 28.8 (27.0 - 30.7)          |
| <b>Mapped SEER stage<sup>3</sup></b> |          |                        |                     |                    |                      |                       |                       |                             |
| Localised                            | All ages | 91.0 (89.1 - 92.6)     | 89.2 (87.2 - 90.8)  | 91.7 (88.8 - 93.9) | 84.4 (80.5 - 87.5)   | 93.7 (87.7 - 96.8)    | 94.2 (91.1 - 96.3)    | 87.7 (86.5 - 88.8)          |
|                                      | 15-49    | 97.5 (94.2 - 98.9)     | 95.5 (92.1 - 97.5)  | 94.9 (86.0 - 98.2) | 92.9 (82.0 - 97.3)   | 100.0 (100.0 - 100.0) | 97.3 (89.2 - 99.4)    | 93.5 (90.2 - 95.7)          |
|                                      | 50-64    | 92.0 (89.8 - 93.7)     | 94.0 (92.0 - 95.6)  | 94.8 (91.2 - 96.9) | 90.7 (85.4 - 94.2)   | 95.3 (88.3 - 98.2)    | 94.1 (90.4 - 96.4)    | 90.5 (88.9 - 91.9)          |
|                                      | 65-79    | 90.1 (87.4 - 92.2)     | 90.4 (87.6 - 92.6)  | 90.7 (86.8 - 93.4) | 90.7 (85.4 - 94.2)   | 92.7 (84.6 - 96.6)    | 94.4 (90.0 - 96.9)    | 88.5 (86.8 - 90.0)          |
|                                      | 80-99    | 87.4 (77.6 - 93.1)     | 73.6 (65.6 - 80.1)  | 84.6 (69.7 - 92.5) | 81.8 (76.2 - 86.3)   | 87.3 (53.5 - 97.1)    | 91.9 (72.2 - 97.8)    | 75.9 (70.3 - 80.6)          |
| Regional                             | All ages | 74.3 (72.1 - 76.3)     | 72.4 (70.6 - 74.2)  | 73.5 (70.8 - 76.1) | 66.8 (63.1 - 70.3)   | 74.6 (70.0 - 78.7)    | 78.3 (74.1 - 81.9)    | 64.7 (63.2 - 66.2)          |
|                                      | 15-49    | 82.2 (77.5 - 86.0)     | 81.9 (77.9 - 85.3)  | 76.0 (67.5 - 82.6) | 82.9 (74.2 - 88.8)   | 81.6 (68.5 - 89.6)    | 88.4 (75.1 - 94.9)    | 72.4 (68.1 - 76.2)          |
|                                      | 50-64    | 79.3 (76.4 - 81.9)     | 79.4 (77.1 - 81.5)  | 81.7 (77.7 - 85.0) | 74.9 (70.0 - 79.1)   | 80.8 (73.5 - 86.2)    | 79.1 (72.7 - 84.1)    | 73.6 (71.3 - 75.7)          |
|                                      | 65-79    | 71.9 (68.6 - 74.9)     | 73.7 (70.9 - 76.2)  | 74.0 (70.0 - 77.5) | 66.7 (61.0 - 71.7)   | 71.1 (64.3 - 76.8)    | 78.4 (71.9 - 83.6)    | 64.3 (62.0 - 66.5)          |
|                                      | 80-99    | 64.5 (55.9 - 71.8)     | 52.1 (45.5 - 58.2)  | 54.5 (43.2 - 64.6) | 39.9 (27.9 - 51.7)   | 62.7 (42.3 - 77.7)    | 70.1 (52.4 - 82.3)    | 42.5 (37.4 - 47.4)          |
| Distant                              | All ages | 18.2 (16.0 - 20.6)     | 16.2 (14.5 - 18.1)  | 23.1 (20.1 - 26.3) | 11.3 (8.6 - 14.4)    | 9.9 (6.8 - 13.7)      | 20.6 (17.6 - 23.8)    | 11.2 (9.9 - 12.7)           |
|                                      | 15-49    | 29.4 (22.2 - 36.8)     | 29.3 (23.3 - 35.6)  | 32.1 (20.5 - 44.2) | 14.8 (6.5 - 26.4)    | 18.0 (8.0 - 31.3)     | 35.3 (23.9 - 46.9)    | 21.1 (15.1 - 27.8)          |
|                                      | 50-64    | 24.6 (20.4 - 29.0)     | 19.6 (16.6 - 22.8)  | 27.6 (22.6 - 32.8) | 13.6 (9.2 - 18.8)    | 16.2 (9.6 - 24.4)     | 28.5 (22.9 - 34.3)    | 14.6 (11.9 - 17.6)          |
|                                      | 65-79    | 15.9 (12.5 - 19.6)     | 15.0 (12.2 - 18.1)  | 19.6 (15.8 - 23.7) | 10.3 (6.4 - 15.2)    | 6.0 (3.0 - 10.4)      | 19.1 (14.4 - 24.2)    | 9.4 (7.6 - 11.5)            |
|                                      | 80-99    | 4.7 (1.9 - 9.4)        | 5.7 (3.1 - 9.4)     | 11.1 (5.2 - 19.5)  | 4.9 (1.0 - 13.8)     | *                     | 4.1 (1.2 - 9.8)       | 3.1 (1.7 - 5.3)             |
| Missing                              | All ages | 64.7 (61.3 - 67.8)     | 55.1 (51.8 - 58.2)  | 72.6 (67.4 - 77.1) | 58.5 (51.7 - 64.6)   | 67.3 (63.8 - 70.6)    | 60.9 (57.0 - 64.5)    | 56.4 (55.4 - 57.3)          |
|                                      | 15-49    | 85.9 (79.3 - 90.5)     | 83.4 (76.8 - 88.2)  | 85.6 (66.1 - 94.3) | 85.7 (69.8 - 93.6)   | 81.1 (72.4 - 87.3)    | 79.9 (67.9 - 87.9)    | 68.2 (65.1 - 71.1)          |
|                                      | 50-64    | 75.7 (70.7 - 79.9)     | 75.5 (70.6 - 79.7)  | 81.1 (73.4 - 86.7) | 67.4 (55.3 - 76.9)   | 72.5 (67.3 - 77.0)    | 77.3 (71.6 - 82.1)    | 67.5 (65.8 - 69.1)          |
|                                      | 65-79    | 62.9 (57.2 - 68.0)     | 50.4 (44.6 - 56.0)  | 67.2 (60.2 - 73.2) | 63.1 (51.6 - 72.7)   | 68.5 (63.3 - 73.2)    | 66.0 (60.3 - 71.0)    | 55.6 (54.1 - 57.1)          |
|                                      | 80-99    | 33.4 (25.2 - 41.7)     | 22.9 (17.9 - 28.2)  | 56.9 (41.6 - 69.6) | 16.1 (6.7 - 29.0)    | 46.1 (34.4 - 56.9)    | 16.5 (9.7 - 24.8)     | 27.2 (25.4 - 29.0)          |

Abbreviation: NS = net survival, CI = confidence interval  
All ages=Age-standardised

<sup>1</sup>Australia includes Victoria (Data on both TNM and SEER) and New South Wales (Data on SEER only)

<sup>2</sup>Canada includes Alberta, British Columbia, New Brunswick, Manitoba, Newfoundland, Nova Scotia, Ontario, Prince Edward Island, and Saskatchewan; Ireland (2010-2013); United Kingdom includes England, Northern Ireland, Scotland, and Wales

<sup>3</sup> Model1: Age spline with mapped SEER stage as time-dependent covariate

<sup>4</sup> Model2: Age spline allowing separate models for each stage category

\* Not possible to estimate

**Supplementary Table 10.** Median age, number of cases and proportions (%) of colon and rectal cancers by imputed stage for individual registries in United Kingdom, 2010-2014

| Country          | Colon cancer |                  |                     |             |             |                  |                     |             | Rectal cancer |                  |                     |             |             |                  |                     |             |
|------------------|--------------|------------------|---------------------|-------------|-------------|------------------|---------------------|-------------|---------------|------------------|---------------------|-------------|-------------|------------------|---------------------|-------------|
|                  | TNM stage    |                  |                     |             | Mapped SEER |                  |                     |             | TNM stage     |                  |                     |             | Mapped SEER |                  |                     |             |
|                  | Stage        | Median age (IQR) | Number of cases (%) | Imputed (%) | Stage       | Median age (IQR) | Number of cases (%) | Imputed (%) | Stage         | Median age (IQR) | Number of cases (%) | Imputed (%) | Stage       | Median age (IQR) | Number of cases (%) | Imputed (%) |
| England          | All          | 73 (64-81)       | 117,865             |             | All         | 73 (64-81)       | 117,865             |             | All           | 70 (61-78)       | 46,152              |             | All         | 70 (61-78)       | 46,152              |             |
|                  | I            | 71 (63-78)       | 9510 (14.7)         | 14.2        | Localised   | 72 (64-80)       | 26008 (38.4)        | 36.9        | I             | 70 (62-77)       | 6289 (24.4)         | 23.9        | Localised   | 70 (62-78)       | 11216 (41.6)        | 40.8        |
|                  | II           | 74 (65-81)       | 19043 (29.5)        | 28.9        | Regional    | 73 (63-80)       | 23776 (35.1)        | 34.4        | II            | 72 (63-79)       | 5001 (19.4)         | 19.4        | Regional    | 68 (60-77)       | 10528 (39.0)        | 38.8        |
|                  | III          | 72 (63-80)       | 17408 (26.9)        | 26.6        | Distant     | 73 (63-81)       | 17408 (26.9)        | 28.7        | III           | 68 (59-77)       | 9067 (35.2)         | 35.4        | Distant     | 70 (60-78)       | 5244 (19.4)         | 20.4        |
|                  | IV           | 73 (63-81)       | 18684 (28.9)        | 30.3        | Missing     | 74 (65-82)       | 50048 (42.5)        |             | IV            | 70 (60-78)       | 5407 (21.0)         | 21.3        | Missing     | 71 (62-80)       | 19164 (41.5)        |             |
|                  | Missing      | 74 (65-82)       | 53220 (45.2)        |             | Missing     | 74 (65-82)       | 50048 (42.5)        |             | Missing       | 71 (62-79)       | 10388 (44.2)        |             | Missing     | 71 (62-80)       | 19164 (41.5)        |             |
| Northern Ireland | All          | 72 (63-80)       | 4,301               |             | All         | 72 (63-80)       | 4,301               |             | All           | 68 (60-76)       | 1,524               |             | All         | 68 (60-76)       | 1,524               |             |
|                  | I            | 70 (63-77)       | 632 (17.1)          | 17.2        | Localised   | 71 (64-78)       | 1464 (39.2)         | 39.6        | I             | 69 (61-76)       | 289 (21.2)          | 22.5        | Localised   | 69 (61-76)       | 596 (43.0)          | 44.6        |
|                  | II           | 72 (64-79)       | 1154 (31.2)         | 30.4        | Regional    | 70 (62-78)       | 1335 (35.7)         | 33.5        | II            | 70 (61-76)       | 319 (23.4)          | 23.3        | Regional    | 66 (58-74)       | 556 (40.1)          | 38.3        |
|                  | III          | 69 (61-77)       | 989 (26.7)          | 25.5        | Distant     | 70 (61-78)       | 938 (25.1)          | 26.9        | III           | 66 (57-74)       | 521 (38.2)          | 36.7        | Distant     | 68 (61-75)       | 235 (16.9)          | 17.0        |
|                  | IV           | 70 (61-78)       | 926 (25.0)          | 26.9        | Missing     | 81 (73-87)       | 564 (13.1)          |             | IV            | 68 (61-75)       | 235 (17.2)          | 17.5        | Missing     | 79 (68-86)       | 137 (9.0)           |             |
|                  | Missing      | 81 (72-87)       | 600 (14.0)          |             | Missing     | 81 (73-87)       | 564 (13.1)          |             | Missing       | 79 (68-86)       | 160 (10.5)          |             | Missing     | 79 (68-86)       | 137 (9.0)           |             |
| Scotland         | All          | 72 (64-80)       | 13,894              |             | All         | 72 (64-80)       | 13,894              |             | All           | 69 (61-78)       | 4,932               |             | All         | 69 (61-78)       | 4,932               |             |
|                  | I            | 69 (62-75)       | 2078 (17.1)         | 15.5        | Localised   | 71 (63-78)       | 5593 (45.7)         | 42.0        | I             | 68 (60-75)       | 1170 (29.7)         | 28.3        | Localised   | 68 (60-75)       | 2151 (53.2)         | 49.9        |
|                  | II           | 72 (64-79)       | 3658 (30.2)         | 28.9        | Regional    | 70 (61-78)       | 3544 (29.0)         | 29.0        | II            | 68 (60-75)       | 946 (24.0)          | 22.2        | Regional    | 67 (59-74)       | 1087 (26.9)         | 25.5        |
|                  | III          | 70 (61-77)       | 3319 (27.4)         | 26.2        | Distant     | 73 (63-81)       | 3092 (25.3)         | 29.0        | III           | 67 (59-74)       | 1016 (25.7)         | 23.5        | Distant     | 69 (60-79)       | 808 (20.0)          | 24.6        |
|                  | IV           | 73 (63-80)       | 3076 (25.4)         | 29.4        | Missing     | 81 (74-87)       | 1665 (12.0)         |             | IV            | 70 (60-79)       | 814 (20.6)          | 26.0        | Missing     | 78 (67-84)       | 886 (18.0)          |             |
|                  | Missing      | 82 (74-87)       | 1763 (12.7)         |             | Missing     | 81 (74-87)       | 1665 (12.0)         |             | Missing       | 77 (67-84)       | 986 (20.0)          |             | Missing     | 78 (67-84)       | 886 (18.0)          |             |
| Wales            | All          | 73 (65-81)       | 8,163               |             | All         | 73 (65-81)       | 8,163               |             | All           | 70 (62-78)       | 3,316               |             | All         | 70 (62-78)       | 3,316               |             |
|                  | I            | 70 (65-78)       | 974 (14.5)          | 13.7        | Localised   | 73 (65-80)       | 2917 (43.3)         | 39.6        | I             | 69 (61-76)       | 552 (19.6)          | 18.0        | Localised   | 70 (62-77)       | 1145 (40.7)         | 37.1        |
|                  | II           | 74 (66-81)       | 1943 (28.9)         | 25.9        | Regional    | 72 (64-80)       | 2211 (32.8)         | 32.4        | II            | 71 (63-78)       | 593 (21.1)          | 19.2        | Regional    | 69 (60-76)       | 1172 (41.6)         | 43.7        |
|                  | III          | 72 (64-80)       | 2211 (32.8)         | 32.3        | Distant     | 73 (64-80)       | 1603 (23.8)         | 28.1        | III           | 69 (60-76)       | 1172 (41.6)         | 43.8        | Distant     | 70 (63-78)       | 498 (17.7)          | 19.1        |
|                  | IV           | 73 (64-80)       | 1603 (23.8)         | 28.1        | Missing     | 77 (66-84)       | 1432 (17.5)         |             | IV            | 70 (63-78)       | 498 (17.7)          | 19.0        | Missing     | 75 (65-85)       | 501 (15.1)          |             |
|                  | Missing      | 77 (66-84)       | 1432 (17.5)         |             | Missing     | 77 (66-84)       | 1432 (17.5)         |             | Missing       | 75 (65-85)       | 501 (15.1)          |             | Missing     | 75 (65-85)       | 501 (15.1)          |             |

**Supplementary Table 11A.** Age-standardised and age-specific one-year net survival (%) by imputed stage at diagnosis for individual registries in United Kingdom for colon cancer patients diagnosed during 2010-2014

| Stage                                |          | England             | Northern Ireland      | Scotland              | Wales                 |
|--------------------------------------|----------|---------------------|-----------------------|-----------------------|-----------------------|
|                                      |          | 1-year NS (95% CI)  | 1-year NS (95% CI)    | 1-year NS (95% CI)    | 1-year NS (95% CI)    |
| All patients <sup>‡</sup>            | All ages | 77.1 (76.8 - 77.4)  | 80.0 (78.4 - 81.5)    | 77.5 (76.6 - 78.4)    | 74.8 (73.5 - 75.9)    |
|                                      | 15-49    | 86.7 (85.7 - 87.6)  | 85.6 (79.8 - 89.8)    | 86.4 (83.1 - 89.1)    | 88.0 (83.5 - 91.4)    |
|                                      | 50-64    | 83.7 (83.1 - 84.3)  | 85.6 (82.5 - 88.2)    | 84.9 (83.2 - 86.4)    | 81.5 (79.0 - 83.7)    |
|                                      | 65-79    | 78.0 (77.5 - 78.4)  | 80.8 (78.5 - 83.0)    | 77.6 (76.2 - 78.9)    | 73.4 (71.5 - 75.1)    |
|                                      | 80-99    | 57.6 (56.9 - 58.2)  | 63.7 (59.5 - 67.5)    | 58.0 (55.8 - 60.1)    | 56.9 (54.1 - 59.5)    |
| <b>TNM Stage<sup>p</sup></b>         |          |                     |                       |                       |                       |
| Stage I                              | All ages | 97.5 (97.0 - 98.0)  | 98.9 (96.6 - 100.0)   | 99.0 (97.8 - 100.0)   | 97.1 (95.6 - 98.7)    |
|                                      | 15-49    | 99.7 (99.2 - 100.0) | 100.0 (100.0 - 100.0) | 100.0 (100.0 - 100.0) | 100.0 (100.0 - 100.0) |
|                                      | 50-64    | 99.1 (98.5 - 99.7)  | 99.7 (97.5 - 100.0)   | 100.0 (99.1 - 100.0)  | 100.0 (98.4 - 100.0)  |
|                                      | 65-79    | 98.5 (97.9 - 99.0)  | 99.5 (97.2 - 100.0)   | 99.6 (98.1 - 100.0)   | 97.0 (94.5 - 99.4)    |
|                                      | 80-99    | 91.0 (88.9 - 93.1)  | 93.9 (81.4 - 100.0)   | 95.4 (90.3 - 100.0)   | 89.8 (82.4 - 97.1)    |
| Stage II                             | All ages | 93.4 (92.9 - 93.8)  | 95.9 (94.1 - 97.7)    | 96.0 (95.0 - 97.1)    | 89.6 (87.8 - 91.3)    |
|                                      | 15-49    | 98.7 (97.9 - 99.4)  | 100.0 (100.0 - 100.0) | 99.5 (98.0 - 100.0)   | 97.1 (92.8 - 100.0)   |
|                                      | 50-64    | 97.3 (96.7 - 97.9)  | 97.0 (94.1 - 99.9)    | 97.9 (96.5 - 99.4)    | 95.3 (92.5 - 98.1)    |
|                                      | 65-79    | 94.2 (93.6 - 94.8)  | 96.9 (94.5 - 99.3)    | 96.0 (94.4 - 97.5)    | 88.5 (85.6 - 91.4)    |
|                                      | 80-99    | 81.3 (79.8 - 82.8)  | 89.0 (82.5 - 95.4)    | 90.4 (86.7 - 94.0)    | 75.2 (69.9 - 80.4)    |
| Stage III                            | All ages | 87.4 (86.9 - 88.0)  | 90.0 (87.3 - 92.7)    | 87.4 (85.8 - 88.9)    | 84.8 (82.9 - 86.7)    |
|                                      | 15-49    | 96.3 (95.3 - 97.4)  | 98.4 (95.1 - 100.0)   | 93.7 (89.9 - 97.6)    | 95.0 (90.6 - 99.4)    |
|                                      | 50-64    | 94.1 (93.3 - 94.8)  | 96.7 (93.8 - 99.6)    | 91.6 (89.3 - 93.9)    | 91.4 (88.4 - 94.4)    |
|                                      | 65-79    | 88.1 (87.3 - 88.9)  | 88.8 (84.8 - 92.8)    | 88.1 (85.9 - 90.4)    | 84.5 (81.6 - 87.4)    |
|                                      | 80-99    | 68.5 (66.9 - 70.0)  | 74.7 (65.2 - 84.2)    | 73.6 (68.5 - 78.7)    | 67.0 (61.8 - 72.3)    |
| Stage IV                             | All ages | 42.4 (41.6 - 43.2)  | 40.1 (36.2 - 44.0)    | 37.6 (35.6 - 39.7)    | 38.4 (35.8 - 41.1)    |
|                                      | 15-49    | 61.0 (58.5 - 63.6)  | 42.3 (28.2 - 56.3)    | 56.1 (47.6 - 64.6)    | 64.2 (52.5 - 75.8)    |
|                                      | 50-64    | 53.1 (51.6 - 54.6)  | 55.2 (47.9 - 62.5)    | 49.5 (45.0 - 54.1)    | 47.1 (41.1 - 53.2)    |
|                                      | 65-79    | 39.0 (37.9 - 40.1)  | 37.9 (32.6 - 43.3)    | 31.3 (28.5 - 34.0)    | 33.5 (30.0 - 37.1)    |
|                                      | 80-99    | 19.5 (18.5 - 20.4)  | 17.1 (11.5 - 22.7)    | 17.1 (14.2 - 20.0)    | 16.2 (12.6 - 19.8)    |
| <b>Mapped SEER stage<sup>p</sup></b> |          |                     |                       |                       |                       |
| Localised                            | All ages | 96.2 (95.8 - 96.5)  | 97.7 (96.3 - 99.1)    | 97.3 (96.6 - 98.1)    | 92.0 (90.8 - 93.3)    |
|                                      | 15-49    | 99.2 (98.6 - 99.8)  | 100.0 (100.0 - 100.0) | 99.7 (98.8 - 100.0)   | 98.4 (95.9 - 100.0)   |
|                                      | 50-64    | 98.8 (98.4 - 99.2)  | 98.5 (96.6 - 100.0)   | 98.9 (98.0 - 99.8)    | 96.9 (94.9 - 98.9)    |
|                                      | 65-79    | 97.1 (96.6 - 97.5)  | 98.4 (96.6 - 100.0)   | 97.6 (96.5 - 98.7)    | 91.9 (89.9 - 93.9)    |
|                                      | 80-99    | 87.4 (86.3 - 88.5)  | 92.2 (85.4 - 99.0)    | 92.2 (89.0 - 95.3)    | 78.6 (74.1 - 83.0)    |
| Regional                             | All ages | 85.9 (85.5 - 86.4)  | 90.8 (88.8 - 92.8)    | 87.1 (85.6 - 88.5)    | 84.9 (83.0 - 86.8)    |
|                                      | 15-49    | 95.8 (94.7 - 96.9)  | 97.9 (94.7 - 100.0)   | 94.2 (90.5 - 97.8)    | 94.7 (90.1 - 99.3)    |
|                                      | 50-64    | 93.4 (92.7 - 94.1)  | 96.2 (93.4 - 98.9)    | 91.7 (89.5 - 93.9)    | 91.5 (88.7 - 94.4)    |
|                                      | 65-79    | 86.5 (85.8 - 87.3)  | 90.2 (86.9 - 93.5)    | 87.7 (85.6 - 89.8)    | 84.6 (81.6 - 87.5)    |
|                                      | 80-99    | 65.3 (64.1 - 66.5)  | 77.6 (70.1 - 85.1)    | 72.3 (67.8 - 76.9)    | 67.4 (62.1 - 72.7)    |
| Distant                              | All ages | 41.4 (40.6 - 42.1)  | 40.4 (36.4 - 44.3)    | 37.7 (35.7 - 39.8)    | 38.3 (35.5 - 41.0)    |
|                                      | 15-49    | 57.2 (54.4 - 60.0)  | 40.2 (25.6 - 54.8)    | 57.0 (48.6 - 65.4)    | 63.3 (51.3 - 75.3)    |
|                                      | 50-64    | 52.2 (50.7 - 53.7)  | 56.3 (49.0 - 63.6)    | 49.5 (45.0 - 54.0)    | 46.7 (41.0 - 52.5)    |
|                                      | 65-79    | 38.6 (37.5 - 39.8)  | 39.0 (33.7 - 44.4)    | 31.4 (28.6 - 34.2)    | 33.5 (30.0 - 37.1)    |
|                                      | 80-99    | 18.5 (17.5 - 19.5)  | 17.1 (11.7 - 22.4)    | 16.9 (14.1 - 19.6)    | 16.2 (12.3 - 20.1)    |

Abbreviation: NS = net survival, CI = confidence interval

All ages=Age-standardised

<sup>‡</sup> Model1: Age spline with mapped SEER stage as time-dependent covariate<sup>p</sup> Model2: Age spline allowing separate models for each stage category

**Supplementary Table 11B.** Age-standardised and age-specific five-year net survival (%) by imputed stage at diagnosis for individual registries in United Kingdom for colon cancer patients diagnosed during 2010-2014

| Stage                                |          | England            | Northern Ireland      | Scotland             | Wales               |
|--------------------------------------|----------|--------------------|-----------------------|----------------------|---------------------|
|                                      |          | 5-year NS (95% CI) | 5-year NS (95% CI)    | 5-year NS (95% CI)   | 5-year NS (95% CI)  |
| All patients <sup>‡</sup>            | All ages | 59.0 (58.6 - 59.4) | 62.5 (60.5 - 64.6)    | 59.7 (58.5 - 60.9)   | 56.8 (55.2 - 58.3)  |
|                                      | 15-49    | 67.0 (65.7 - 68.3) | 71.3 (64.8 - 76.9)    | 64.3 (59.9 - 68.4)   | 70.2 (64.5 - 75.2)  |
|                                      | 50-64    | 63.9 (63.1 - 64.6) | 67.5 (63.7 - 71.0)    | 66.2 (64.1 - 68.2)   | 62.2 (59.3 - 65.0)  |
|                                      | 65-79    | 61.0 (60.4 - 61.6) | 61.1 (58.0 - 64.0)    | 60.9 (59.2 - 62.5)   | 54.9 (52.7 - 57.1)  |
|                                      | 80-99    | 41.1 (40.2 - 42.0) | 49.7 (43.7 - 55.4)    | 41.1 (38.2 - 44.0)   | 41.5 (37.8 - 45.2)  |
| <b>TNM Stage<sup>‡</sup></b>         |          |                    |                       |                      |                     |
| Stage I                              | All ages | 95.9 (94.6 - 97.2) | 98.8 (94.6 - 100.0)   | 96.8 (94.1 - 99.6)   | 93.6 (90.2 - 97.0)  |
|                                      | 15-49    | 95.9 (94.1 - 97.8) | 100.0 (100.0 - 100.0) | 98.8 (94.5 - 100.0)  | 99.8 (95.0 - 100.0) |
|                                      | 50-64    | 95.6 (94.0 - 97.3) | 95.9 (90.6 - 100.0)   | 98.5 (96.1 - 100.0)  | 99.6 (96.1 - 100.0) |
|                                      | 65-79    | 97.9 (96.5 - 99.2) | 96.0 (90.3 - 100.0)   | 100.0 (97.1 - 100.0) | 89.9 (85.0 - 94.8)  |
|                                      | 80-99    | 92.8 (88.3 - 97.3) | 100.0 (86.0 - 100.0)  | 85.2 (73.2 - 97.3)   | 86.2 (71.2 - 100.0) |
| Stage II                             | All ages | 86.3 (85.6 - 87.1) | 88.8 (85.5 - 92.0)    | 86.3 (84.4 - 88.3)   | 77.9 (75.3 - 80.6)  |
|                                      | 15-49    | 91.5 (89.1 - 93.9) | 92.3 (85.6 - 98.9)    | 89.6 (83.5 - 95.7)   | 93.0 (86.4 - 99.7)  |
|                                      | 50-64    | 89.3 (88.0 - 90.6) | 91.5 (86.7 - 96.3)    | 90.4 (87.6 - 93.2)   | 81.6 (76.8 - 86.4)  |
|                                      | 65-79    | 87.5 (86.6 - 88.5) | 87.9 (83.1 - 92.8)    | 85.1 (82.2 - 87.9)   | 75.5 (71.4 - 79.6)  |
|                                      | 80-99    | 75.5 (73.1 - 78.0) | 84.9 (72.8 - 97.1)    | 79.8 (72.8 - 86.8)   | 63.9 (56.1 - 71.8)  |
| Stage III                            | All ages | 64.1 (63.1 - 65.2) | 66.6 (62.7 - 70.6)    | 61.7 (59.4 - 63.9)   | 61.4 (58.6 - 64.1)  |
|                                      | 15-49    | 79.3 (76.8 - 81.9) | 88.2 (80.5 - 96.0)    | 69.4 (62.4 - 76.3)   | 78.5 (70.2 - 86.8)  |
|                                      | 50-64    | 72.7 (71.0 - 74.3) | 77.9 (71.9 - 83.9)    | 68.0 (64.3 - 71.7)   | 69.1 (64.4 - 73.7)  |
|                                      | 65-79    | 64.4 (63.0 - 65.7) | 60.3 (54.1 - 66.5)    | 61.9 (58.5 - 65.2)   | 59.5 (55.5 - 63.4)  |
|                                      | 80-99    | 38.6 (36.6 - 40.6) | 43.8 (32.7 - 55.0)    | 43.4 (36.9 - 49.9)   | 39.8 (32.4 - 47.2)  |
| Stage IV                             | All ages | 9.4 (8.9 - 9.9)    | 9.3 (7.0 - 11.6)      | 7.5 (6.3 - 8.7)      | 8.4 (6.3 - 10.5)    |
|                                      | 15-49    | 20.8 (18.5 - 23.1) | 11.1 (2.5 - 19.8)     | 15.6 (9.0 - 22.2)    | 19.4 (8.7 - 30.1)   |
|                                      | 50-64    | 13.1 (11.9 - 14.3) | 14.5 (9.1 - 19.8)     | 11.0 (8.2 - 13.7)    | 10.0 (5.6 - 14.5)   |
|                                      | 65-79    | 7.3 (6.6 - 8.0)    | 6.2 (3.6 - 8.9)       | 4.7 (3.4 - 6.0)      | 6.2 (3.5 - 8.9)     |
|                                      | 80-99    | 1.4 (1.1 - 1.8)    | 0.7 (0.0 - 1.8)       | 1.4 (0.4 - 2.4)      | 1.4 (0.0 - 3.4)     |
| <b>Mapped SEER stage<sup>‡</sup></b> |          |                    |                       |                      |                     |
| Localised                            | All ages | 93.1 (92.5 - 93.7) | 95.2 (92.3 - 98.0)    | 90.4 (88.7 - 92.1)   | 83.1 (80.9 - 85.3)  |
|                                      | 15-49    | 93.8 (92.4 - 95.2) | 97.5 (93.7 - 100.0)   | 92.7 (88.3 - 97.0)   | 95.5 (91.0 - 99.9)  |
|                                      | 50-64    | 94.0 (93.1 - 94.8) | 94.7 (90.9 - 98.5)    | 93.7 (91.7 - 95.6)   | 87.6 (84.2 - 91.0)  |
|                                      | 65-79    | 95.0 (94.0 - 95.9) | 92.6 (88.6 - 96.6)    | 90.6 (88.5 - 92.8)   | 87.6 (84.2 - 91.0)  |
|                                      | 80-99    | 87.6 (85.4 - 89.7) | 100.0 (88.7 - 100.0)  | 81.6 (74.9 - 88.4)   | 69.5 (62.5 - 76.5)  |
| Regional                             | All ages | 62.6 (61.8 - 63.4) | 69.4 (66.0 - 72.8)    | 61.8 (59.6 - 64.1)   | 61.3 (58.5 - 64.1)  |
|                                      | 15-49    | 76.3 (74.0 - 78.7) | 87.3 (80.3 - 94.2)    | 70.1 (63.3 - 76.9)   | 77.6 (69.1 - 86.1)  |
|                                      | 50-64    | 72.0 (70.7 - 73.3) | 79.9 (74.7 - 85.1)    | 68.0 (64.4 - 71.7)   | 69.4 (64.8 - 74.0)  |
|                                      | 65-79    | 63.0 (61.7 - 64.3) | 65.0 (59.7 - 70.2)    | 62.1 (58.9 - 65.3)   | 59.5 (55.3 - 63.6)  |
|                                      | 80-99    | 36.2 (34.5 - 37.9) | 48.7 (38.1 - 59.2)    | 42.7 (36.2 - 49.2)   | 40.0 (32.9 - 47.1)  |
| Distant                              | All ages | 8.5 (7.8 - 9.1)    | 8.5 (6.3 - 10.7)      | 7.5 (6.3 - 8.8)      | 8.1 (6.0 - 10.1)    |
|                                      | 15-49    | 15.2 (12.2 - 18.1) | 6.3 (0.0 - 14.0)      | 16.2 (9.4 - 22.9)    | 17.1 (7.0 - 27.2)   |
|                                      | 50-64    | 12.3 (11.2 - 13.4) | 14.5 (9.1 - 19.8)     | 11.1 (8.4 - 13.9)    | 9.7 (5.5 - 13.8)    |
|                                      | 65-79    | 7.0 (6.3 - 7.8)    | 6.7 (4.0 - 9.4)       | 4.6 (3.4 - 5.9)      | 6.4 (3.9 - 9.0)     |
|                                      | 80-99    | 1.2 (0.8 - 1.7)    | 0.7 (0.0 - 1.8)       | 1.4 (0.5 - 2.4)      | 1.3 (0.0 - 3.2)     |

Abbreviation: NS = net survival, CI = confidence interval

All ages=Age-standardised

<sup>‡</sup> Model1: Age spline with mapped SEER stage as time-dependent covariate<sup>‡</sup> Model2: Age spline allowing separate models for each stage category

**Supplementary Table 12A.** Age-standardised and age-specific one-year net survival (%) by imputed stage at diagnosis for individual registries in United Kingdom for rectal cancer patients diagnosed during 2010-2014

| Stage                                |          | England             | Northern Ireland      | Scotland              | Wales                 |
|--------------------------------------|----------|---------------------|-----------------------|-----------------------|-----------------------|
|                                      |          | 1-year NS (95% CI)  | 1-year NS (95% CI)    | 1-year NS (95% CI)    | 1-year NS (95% CI)    |
| All patients <sup>‡</sup>            | All ages | 84.9 (84.4 - 85.3)  | 84.7 (82.1 - 86.9)    | 84.6 (83.2 - 85.9)    | 84.9 (83.3 - 86.4)    |
|                                      | 15-49    | 90.8 (89.5 - 92.0)  | 85.7 (76.5 - 91.5)    | 89.3 (84.6 - 92.7)    | 92.3 (86.3 - 95.7)    |
|                                      | 50-64    | 90.8 (90.2 - 91.4)  | 93.6 (90.0 - 95.9)    | 91.2 (89.1 - 92.9)    | 90.2 (87.4 - 92.4)    |
|                                      | 65-79    | 85.0 (84.3 - 85.6)  | 82.6 (78.6 - 85.9)    | 84.7 (82.6 - 86.6)    | 84.7 (82.2 - 86.9)    |
|                                      | 80-99    | 69.7 (68.4 - 70.9)  | 71.8 (63.1 - 78.7)    | 69.4 (65.0 - 73.3)    | 70.2 (65.0 - 74.7)    |
| <b>TNM Stage<sup>‡</sup></b>         |          |                     |                       |                       |                       |
| Stage I                              | All ages | 97.6 (97.0 - 98.2)  | 98.1 (94.0 - 100.0)   | 100.0 (98.7 - 100.0)  | 97.3 (94.8 - 99.8)    |
|                                      | 15-49    | 99.0 (97.8 - 100.0) | 100.0 (100.0 - 100.0) | 100.0 (100.0 - 100.0) | 100.0 (100.0 - 100.0) |
|                                      | 50-64    | 99.0 (98.4 - 99.6)  | 100.0 (98.9 - 100.0)  | 100.0 (98.9 - 100.0)  | 99.0 (96.7 - 100.0)   |
|                                      | 65-79    | 98.1 (97.4 - 98.9)  | 96.7 (91.7 - 100.0)   | 99.6 (97.6 - 100.0)   | 97.6 (93.9 - 100.0)   |
|                                      | 80-99    | 92.5 (89.9 - 95.0)  | 96.1 (80.3 - 100.0)   | 100.0 (95.3 - 100.0)  | 89.6 (77.9 - 100.0)   |
| Stage II                             | All ages | 92.5 (91.7 - 93.3)  | 95.6 (92.5 - 98.8)    | 97.7 (95.8 - 99.6)    | 88.8 (85.5 - 92.1)    |
|                                      | 15-49    | 98.0 (96.1 - 99.9)  | 100.0 (100.0 - 100.0) | 99.7 (96.9 - 100.0)   | 100.0 (100.0 - 100.0) |
|                                      | 50-64    | 97.4 (96.3 - 98.5)  | 100.0 (98.5 - 100.0)  | 98.6 (96.7 - 100.0)   | 92.3 (87.0 - 97.6)    |
|                                      | 65-79    | 92.0 (90.8 - 93.3)  | 95.2 (90.0 - 100.0)   | 97.7 (95.0 - 100.0)   | 86.0 (80.7 - 91.4)    |
|                                      | 80-99    | 80.7 (78.1 - 83.3)  | 83.2 (67.8 - 98.6)    | 94.8 (86.9 - 100.0)   | 81.3 (71.9 - 90.7)    |
| Stage III                            | All ages | 90.9 (90.2 - 91.7)  | 88.7 (84.7 - 92.7)    | 92.9 (90.4 - 95.4)    | 92.7 (90.7 - 94.7)    |
|                                      | 15-49    | 95.6 (94.2 - 97.1)  | 90.8 (82.2 - 99.4)    | 96.5 (92.3 - 100.0)   | 97.5 (93.7 - 100.0)   |
|                                      | 50-64    | 96.0 (95.2 - 96.7)  | 97.0 (93.6 - 100.0)   | 97.9 (95.5 - 100.0)   | 96.4 (94.0 - 98.8)    |
|                                      | 65-79    | 91.0 (90.0 - 92.1)  | 86.2 (80.5 - 92.0)    | 91.6 (87.9 - 95.3)    | 93.5 (90.8 - 96.2)    |
|                                      | 80-99    | 77.6 (75.0 - 80.1)  | 78.5 (59.0 - 98.1)    | 84.8 (75.6 - 93.9)    | 80.4 (72.5 - 88.3)    |
| Stage IV                             | All ages | 54.0 (52.7 - 55.3)  | 44.5 (37.1 - 52.0)    | 49.1 (45.4 - 52.8)    | 50.7 (45.6 - 55.7)    |
|                                      | 15-49    | 69.8 (65.4 - 74.2)  | 49.3 (25.6 - 73.0)    | 61.7 (49.3 - 74.2)    | 61.1 (41.3 - 81.0)    |
|                                      | 50-64    | 65.4 (63.1 - 67.7)  | 62.0 (47.1 - 76.8)    | 62.1 (55.3 - 68.9)    | 60.2 (50.4 - 69.9)    |
|                                      | 65-79    | 51.0 (49.0 - 53.0)  | 42.9 (32.1 - 53.7)    | 43.1 (37.4 - 48.9)    | 50.3 (43.1 - 57.6)    |
|                                      | 80-99    | 31.1 (28.6 - 33.6)  | 17.1 (2.9 - 31.4)     | 32.1 (24.7 - 39.5)    | 26.6 (17.4 - 35.8)    |
| <b>Mapped SEER stage<sup>‡</sup></b> |          |                     |                       |                       |                       |
| Localised                            | All ages | 95.9 (95.4 - 96.3)  | 97.2 (94.9 - 99.6)    | 98.6 (97.4 - 99.7)    | 93.1 (91.0 - 95.2)    |
|                                      | 15-49    | 98.7 (97.7 - 99.7)  | 100.0 (100.0 - 100.0) | 100.0 (98.7 - 100.0)  | 100.0 (100.0 - 100.0) |
|                                      | 50-64    | 98.5 (98.0 - 99.1)  | 99.9 (98.4 - 100.0)   | 99.3 (98.2 - 100.0)   | 95.6 (92.7 - 98.6)    |
|                                      | 65-79    | 96.2 (95.6 - 96.8)  | 96.1 (92.6 - 99.6)    | 98.2 (96.4 - 100.0)   | 92.4 (89.3 - 95.5)    |
|                                      | 80-99    | 88.1 (86.3 - 89.9)  | 93.2 (83.0 - 100.0)   | 96.9 (91.5 - 100.0)   | 84.8 (77.0 - 92.7)    |
| Regional                             | All ages | 89.9 (89.2 - 90.5)  | 87.9 (84.1 - 91.7)    | 91.3 (88.9 - 93.7)    | 92.7 (90.7 - 94.8)    |
|                                      | 15-49    | 95.4 (93.9 - 96.9)  | 89.7 (80.9 - 98.4)    | 96.5 (92.3 - 100.0)   | 97.3 (93.2 - 100.0)   |
|                                      | 50-64    | 95.5 (94.7 - 96.4)  | 97.0 (93.8 - 100.0)   | 97.7 (95.4 - 100.0)   | 96.3 (93.8 - 98.7)    |
|                                      | 65-79    | 89.9 (88.9 - 90.8)  | 86.7 (81.2 - 92.2)    | 89.6 (86.1 - 93.1)    | 93.5 (90.6 - 96.3)    |
|                                      | 80-99    | 75.3 (73.1 - 77.5)  | 71.8 (55.2 - 88.4)    | 80.7 (71.6 - 89.8)    | 81.3 (73.6 - 89.0)    |
| Distant                              | All ages | 53.2 (51.9 - 54.6)  | 44.7 (37.1 - 52.3)    | 49.2 (45.5 - 52.9)    | 50.5 (45.3 - 55.7)    |
|                                      | 15-49    | 69.4 (64.9 - 73.9)  | 49.8 (25.6 - 74.1)    | 63.3 (51.1 - 75.5)    | 61.5 (41.4 - 81.5)    |
|                                      | 50-64    | 64.8 (62.3 - 67.3)  | 62.1 (47.0 - 77.1)    | 61.7 (54.9 - 68.6)    | 60.5 (50.7 - 70.4)    |
|                                      | 65-79    | 50.1 (48.1 - 52.2)  | 42.8 (32.2 - 53.5)    | 43.1 (37.3 - 48.8)    | 50.0 (42.8 - 57.1)    |
|                                      | 80-99    | 30.0 (27.5 - 32.5)  | 16.8 (3.6 - 29.9)     | 33.2 (26.2 - 40.2)    | 25.9 (16.1 - 35.7)    |

Abbreviation: NS = net survival, CI = confidence interval

All ages=Age-standardised

<sup>‡</sup> Model1: Age spline with mapped SEER stage as time-dependent covariate<sup>‡</sup> Model2: Age spline allowing separate models for each stage category



**Supplementary Table 12B.** Age-standardised and age-specific five-year net survival (%) by imputed stage at diagnosis for individual registries in United Kingdom for rectal cancer patients diagnosed during 2010-2014

| Stage                                |          | England            | Northern Ireland      | Scotland            | Wales               |
|--------------------------------------|----------|--------------------|-----------------------|---------------------|---------------------|
|                                      |          | 5-year NS (95% CI) | 5-year NS (95% CI)    | 5-year NS (95% CI)  | 5-year NS (95% CI)  |
| All patients <sup>‡</sup>            | All ages | 62.1 (61.5 - 62.8) | 60.7 (57.2 - 64.0)    | 62.8 (60.9 - 64.7)  | 60.8 (58.4 - 63.1)  |
|                                      | 15-49    | 68.7 (66.7 - 70.6) | 65.8 (55.2 - 74.5)    | 69.5 (63.3 - 75.0)  | 72.6 (64.2 - 79.3)  |
|                                      | 50-64    | 70.3 (69.3 - 71.3) | 68.7 (63.2 - 73.6)    | 70.2 (67.2 - 73.0)  | 66.7 (62.7 - 70.3)  |
|                                      | 65-79    | 63.6 (62.6 - 64.5) | 57.9 (52.8 - 62.7)    | 65.1 (62.2 - 67.8)  | 61.8 (58.3 - 65.1)  |
|                                      | 80-99    | 38.9 (37.2 - 40.6) | 50.8 (38.5 - 61.9)    | 40.5 (35.0 - 46.0)  | 37.8 (30.7 - 44.8)  |
| <b>TNM Stage<sup>¶</sup></b>         |          |                    |                       |                     |                     |
| Stage I                              | All ages | 92.0 (90.7 - 93.3) | 94.2 (87.1 - 100.0)   | 95.0 (91.6 - 98.4)  | 93.6 (88.7 - 98.5)  |
|                                      | 15-49    | 94.3 (90.9 - 97.6) | 100.0 (100.0 - 100.0) | 94.2 (87.1 - 100.0) | 95.3 (83.7 - 100.0) |
|                                      | 50-64    | 94.4 (93.0 - 95.8) | 94.4 (86.9 - 100.0)   | 94.6 (91.1 - 98.1)  | 89.5 (83.3 - 95.7)  |
|                                      | 65-79    | 93.7 (92.0 - 95.4) | 92.9 (83.6 - 100.0)   | 95.0 (90.4 - 99.6)  | 96.4 (90.2 - 100.0) |
|                                      | 80-99    | 81.4 (75.7 - 87.1) | 95.4 (64.7 - 100.0)   | 96.0 (78.1 - 100.0) | 94.0 (69.2 - 100.0) |
| Stage II                             | All ages | 74.8 (73.3 - 76.3) | 79.1 (70.2 - 88.1)    | 81.5 (77.2 - 85.9)  | 69.0 (64.1 - 74.0)  |
|                                      | 15-49    | 83.6 (79.4 - 87.8) | 88.1 (71.1 - 100.0)   | 87.8 (77.9 - 97.7)  | 91.6 (78.4 - 100.0) |
|                                      | 50-64    | 84.0 (81.8 - 86.3) | 84.6 (74.9 - 94.2)    | 82.3 (77.1 - 87.5)  | 77.7 (69.8 - 85.7)  |
|                                      | 65-79    | 75.8 (73.6 - 78.0) | 81.0 (71.1 - 91.0)    | 84.0 (78.1 - 90.0)  | 69.6 (62.2 - 77.1)  |
|                                      | 80-99    | 48.2 (43.4 - 53.1) | 57.8 (33.2 - 82.4)    | 70.7 (54.0 - 87.4)  | 32.5 (19.9 - 45.2)  |
| Stage III                            | All ages | 65.4 (64.0 - 66.7) | 58.0 (51.7 - 64.3)    | 62.5 (58.5 - 66.5)  | 64.3 (60.2 - 68.4)  |
|                                      | 15-49    | 76.5 (73.0 - 79.9) | 66.4 (52.6 - 80.3)    | 74.4 (64.4 - 84.5)  | 74.8 (64.0 - 85.6)  |
|                                      | 50-64    | 77.0 (75.3 - 78.7) | 73.2 (65.4 - 81.1)    | 70.4 (64.8 - 76.1)  | 69.6 (63.4 - 75.7)  |
|                                      | 65-79    | 65.5 (63.5 - 67.5) | 51.4 (43.0 - 59.9)    | 63.9 (57.6 - 70.2)  | 64.4 (58.6 - 70.3)  |
|                                      | 80-99    | 34.6 (30.8 - 38.3) | 44.9 (19.8 - 70.0)    | 37.3 (25.5 - 49.1)  | 44.0 (28.9 - 59.0)  |
| Stage IV                             | All ages | 9.8 (8.7 - 11.0)   | 4.3 (1.4 - 7.1)       | 7.7 (5.3 - 10.1)    | 6.8 (3.7 - 9.9)     |
|                                      | 15-49    | 18.6 (13.2 - 23.9) | 11.0 (0.0 - 28.4)     | 20.3 (8.3 - 32.2)   | 17.4 (0.0 - 39.9)   |
|                                      | 50-64    | 14.9 (12.5 - 17.3) | 1.8 (0.0 - 5.1)       | 13.1 (6.7 - 19.4)   | 10.4 (4.0 - 16.9)   |
|                                      | 65-79    | 7.6 (6.4 - 8.9)    | 6.7 (2.0 - 11.3)      | 3.9 (1.5 - 6.2)     | 5.5 (1.6 - 9.4)     |
|                                      | 80-99    | 1.3 (0.6 - 2.0)    | *                     | 1.3 (0.0 - 2.8)     | *                   |
| <b>Mapped SEER stage<sup>¶</sup></b> |          |                    |                       |                     |                     |
| Localised                            | All ages | 85.7 (84.5 - 86.9) | 86.7 (81.9 - 91.6)    | 88.2 (85.6 - 90.8)  | 80.3 (76.9 - 83.8)  |
|                                      | 15-49    | 91.2 (88.5 - 94.0) | 94.2 (85.1 - 100.0)   | 91.0 (84.6 - 97.3)  | 92.1 (82.2 - 100.0) |
|                                      | 50-64    | 91.2 (89.7 - 92.6) | 88.8 (82.7 - 94.8)    | 89.0 (86.0 - 92.0)  | 84.0 (79.0 - 89.1)  |
|                                      | 65-79    | 87.3 (85.9 - 88.6) | 87.0 (80.0 - 94.1)    | 89.4 (85.9 - 92.9)  | 84.0 (79.0 - 89.1)  |
|                                      | 80-99    | 67.1 (62.9 - 71.3) | 77.2 (58.0 - 96.4)    | 81.9 (69.4 - 94.4)  | 56.0 (43.2 - 68.9)  |
| Regional                             | All ages | 62.6 (61.1 - 64.0) | 58.3 (52.6 - 64.1)    | 62.0 (58.2 - 65.8)  | 64.3 (60.3 - 68.3)  |
|                                      | 15-49    | 74.0 (70.5 - 77.5) | 66.9 (53.7 - 80.2)    | 74.7 (64.9 - 84.4)  | 74.9 (64.1 - 85.6)  |
|                                      | 50-64    | 74.4 (72.5 - 76.2) | 72.3 (64.7 - 79.9)    | 70.1 (64.7 - 75.5)  | 69.8 (63.6 - 76.0)  |
|                                      | 65-79    | 62.6 (60.6 - 64.6) | 53.3 (45.4 - 61.2)    | 63.0 (57.2 - 68.7)  | 64.7 (58.9 - 70.5)  |
|                                      | 80-99    | 31.8 (27.5 - 36.1) | 41.8 (20.1 - 63.5)    | 36.9 (23.7 - 50.1)  | 42.6 (28.6 - 56.5)  |
| Distant                              | All ages | 9.7 (8.5 - 10.9)   | 4.4 (1.4 - 7.4)       | 7.4 (5.1 - 9.7)     | 6.6 (3.8 - 9.3)     |
|                                      | 15-49    | 18.7 (14.7 - 22.8) | *                     | 21.0 (8.0 - 34.1)   | 16.8 (0.0 - 36.3)   |
|                                      | 50-64    | 14.9 (12.2 - 17.5) | 2.2 (0.0 - 6.3)       | 13.1 (7.0 - 19.3)   | 9.7 (3.4 - 15.9)    |
|                                      | 65-79    | 7.4 (5.9 - 8.8)    | 6.4 (1.8 - 11.0)      | 3.6 (1.3 - 5.9)     | 5.5 (2.0 - 9.1)     |
|                                      | 80-99    | 1.2 (0.4 - 2.0)    | *                     | 1.5 (0.0 - 3.3)     | *                   |

Abbreviation: NS = net survival, CI = confidence interval

All ages=Age-standardised

<sup>‡</sup> Model1: Age spline with mapped SEER stage as time-dependent covariate<sup>¶</sup> Model2: Age spline allowing separate models for each stage category

\* Not possible to estimate

**Supplementary Table 13A.** Age-standardised and age-specific one-year net survival (%) by stage at diagnosis (without imputation) for individual registries in United Kingdom for colon cancer patients diagnosed during 2010-2014

| Stage                                |          | England             | Northern Ireland      | Scotland              | Wales                 |
|--------------------------------------|----------|---------------------|-----------------------|-----------------------|-----------------------|
|                                      |          | 1-year NS (95% CI)  | 1-year NS (95% CI)    | 1-year NS (95% CI)    | 1-year NS (95% CI)    |
| All patients <sup>‡</sup>            | All ages | 77.0 (76.7 - 77.3)  | 80.0 (78.4 - 81.5)    | 77.5 (76.6 - 78.4)    | 74.8 (73.5 - 75.9)    |
|                                      | 15-49    | 86.6 (85.6 - 87.5)  | 85.6 (79.8 - 89.8)    | 86.4 (83.1 - 89.1)    | 88.0 (83.5 - 91.4)    |
|                                      | 50-64    | 83.6 (83.1 - 84.2)  | 85.6 (82.5 - 88.2)    | 84.9 (83.2 - 86.4)    | 81.5 (79.0 - 83.7)    |
|                                      | 65-79    | 77.9 (77.4 - 78.4)  | 80.7 (78.3 - 82.8)    | 77.5 (76.2 - 78.8)    | 73.4 (71.5 - 75.1)    |
|                                      | 80-99    | 57.4 (56.7 - 58.1)  | 63.7 (59.5 - 67.5)    | 57.9 (55.7 - 60.0)    | 56.9 (54.1 - 59.5)    |
| <b>TNM Stage<sup>§</sup></b>         |          |                     |                       |                       |                       |
| Stage I                              | All ages | 98.2 (97.7 - 98.6)  | 99.5 (91.3 - 100.0)   | 99.6 (94.9 - 100.0)   | 97.4 (95.3 - 98.6)    |
|                                      | 15-49    | 99.8 (98.2 - 100.0) | 100.0 (100.0 - 100.0) | 100.0 (100.0 - 100.0) | 100.0 (100.0 - 100.0) |
|                                      | 50-64    | 99.3 (98.5 - 99.7)  | 99.6 (29.3 - 100.0)   | 100.0 (100.0 - 100.0) | 100.0 (100.0 - 100.0) |
|                                      | 65-79    | 98.9 (98.2 - 99.3)  | 99.4 (82.5 - 100.0)   | 100.0 (100.0 - 100.0) | 97.2 (93.6 - 98.8)    |
|                                      | 80-99    | 93.5 (91.5 - 95.0)  | 98.9 (0.0 - 100.0)    | 98.3 (75.3 - 99.9)    | 90.6 (80.3 - 95.6)    |
| Stage II                             | All ages | 94.6 (94.2 - 94.9)  | 97.3 (95.3 - 98.5)    | 97.4 (96.4 - 98.2)    | 90.7 (88.8 - 92.3)    |
|                                      | 15-49    | 98.7 (97.6 - 99.3)  | 100.0 (100.0 - 100.0) | 99.4 (91.3 - 100.0)   | 96.4 (85.5 - 99.1)    |
|                                      | 50-64    | 97.6 (96.9 - 98.1)  | 97.0 (92.2 - 98.9)    | 98.1 (96.0 - 99.1)    | 95.5 (91.5 - 97.6)    |
|                                      | 65-79    | 94.8 (94.2 - 95.4)  | 97.7 (94.1 - 99.1)    | 97.0 (95.3 - 98.1)    | 89.6 (86.5 - 92.0)    |
|                                      | 80-99    | 86.0 (84.7 - 87.2)  | 95.0 (85.8 - 98.3)    | 96.1 (91.6 - 98.2)    | 79.6 (74.0 - 84.2)    |
| Stage III                            | All ages | 88.7 (88.2 - 89.2)  | 91.7 (89.1 - 93.7)    | 89.5 (88.0 - 90.8)    | 86.0 (84.0 - 87.7)    |
|                                      | 15-49    | 96.4 (95.0 - 97.4)  | 98.4 (86.7 - 99.8)    | 93.1 (87.2 - 96.3)    | 92.7 (83.1 - 97.0)    |
|                                      | 50-64    | 94.2 (93.3 - 95.0)  | 96.7 (92.2 - 98.7)    | 91.8 (89.2 - 93.8)    | 91.4 (87.9 - 93.9)    |
|                                      | 65-79    | 89.0 (88.2 - 89.8)  | 89.8 (85.3 - 92.9)    | 89.9 (87.6 - 91.7)    | 85.8 (82.8 - 88.4)    |
|                                      | 80-99    | 72.7 (71.0 - 74.2)  | 82.4 (72.8 - 88.9)    | 81.7 (76.8 - 85.7)    | 72.1 (66.6 - 76.9)    |
| Stage IV                             | All ages | 43.7 (42.9 - 44.5)  | 40.6 (36.5 - 44.7)    | 38.9 (36.7 - 41.1)    | 39.0 (36.1 - 42.0)    |
|                                      | 15-49    | 58.5 (55.5 - 61.4)  | 38.5 (24.7 - 52.2)    | 54.7 (45.8 - 62.8)    | 58.9 (45.0 - 70.4)    |
|                                      | 50-64    | 53.9 (52.3 - 55.5)  | 55.4 (47.7 - 62.5)    | 50.8 (46.1 - 55.2)    | 46.9 (40.9 - 52.8)    |
|                                      | 65-79    | 41.5 (40.3 - 42.6)  | 40.2 (34.5 - 45.9)    | 34.2 (31.2 - 37.3)    | 35.6 (31.8 - 39.4)    |
|                                      | 80-99    | 20.8 (19.6 - 22.0)  | 18.3 (12.2 - 25.3)    | 17.7 (14.7 - 20.9)    | 18.6 (14.5 - 23.2)    |
| Missing                              | All ages | 72.2 (71.5 - 72.8)  | 69.0 (62.0 - 75.0)    | 57.2 (52.9 - 61.3)    | 65.8 (62.0 - 69.2)    |
|                                      | 15-49    | 88.3 (86.5 - 89.9)  | 95.3 (70.2 - 99.4)    | 98.1 (85.2 - 99.8)    | 95.3 (85.8 - 98.5)    |
|                                      | 50-64    | 82.4 (81.0 - 83.7)  | 85.4 (59.4 - 95.3)    | 65.8 (52.4 - 76.3)    | 80.5 (72.1 - 86.6)    |
|                                      | 65-79    | 71.7 (70.6 - 72.8)  | 56.5 (46.5 - 65.4)    | 43.2 (37.8 - 48.5)    | 58.9 (52.6 - 64.6)    |
|                                      | 80-99    | 44.9 (43.7 - 46.1)  | 38.7 (31.1 - 46.2)    | 37.2 (33.3 - 41.2)    | 37.7 (32.1 - 43.2)    |
| <b>Mapped SEER stage<sup>¶</sup></b> |          |                     |                       |                       |                       |
| Localised                            | All ages | 97.2 (96.9 - 97.5)  | 98.7 (96.9 - 99.4)    | 98.2 (97.4 - 98.8)    | 93.0 (91.6 - 94.1)    |
|                                      | 15-49    | 99.5 (98.9 - 99.8)  | 100.0 (100.0 - 100.0) | 99.7 (92.2 - 100.0)   | 97.6 (90.0 - 99.5)    |
|                                      | 50-64    | 99.1 (98.6 - 99.4)  | 98.5 (94.6 - 99.6)    | 98.9 (97.5 - 99.5)    | 97.2 (94.6 - 98.6)    |
|                                      | 65-79    | 97.6 (97.2 - 98.0)  | 98.8 (95.5 - 99.7)    | 98.3 (97.1 - 99.1)    | 92.4 (90.2 - 94.1)    |
|                                      | 80-99    | 91.5 (90.4 - 92.4)  | 97.2 (85.5 - 99.5)    | 95.5 (91.8 - 97.5)    | 82.4 (77.8 - 86.2)    |
| Regional                             | All ages | 87.9 (87.4 - 88.3)  | 92.4 (90.2 - 94.1)    | 88.9 (87.4 - 90.2)    | 86.0 (84.0 - 87.7)    |
|                                      | 15-49    | 96.5 (95.3 - 97.4)  | 97.6 (89.9 - 99.5)    | 97.6 (89.9 - 99.5)    | 92.7 (83.1 - 97.0)    |
|                                      | 50-64    | 93.8 (93.1 - 94.5)  | 96.1 (92.1 - 98.1)    | 91.9 (89.4 - 93.8)    | 91.4 (87.9 - 93.9)    |
|                                      | 65-79    | 87.8 (87.1 - 88.5)  | 91.0 (87.3 - 93.7)    | 89.5 (87.3 - 91.3)    | 85.8 (82.8 - 88.4)    |
|                                      | 80-99    | 71.3 (70.0 - 72.7)  | 85.0 (77.1 - 90.4)    | 79.1 (74.4 - 83.0)    | 72.1 (66.6 - 76.9)    |
| Distant                              | All ages | 43.7 (42.9 - 44.5)  | 41.2 (37.1 - 45.2)    | 38.8 (36.7 - 41.0)    | 39.0 (36.1 - 42.0)    |
|                                      | 15-49    | 58.6 (55.5 - 61.5)  | 38.5 (24.7 - 52.2)    | 55.7 (46.9 - 63.6)    | 58.9 (45.0 - 70.4)    |
|                                      | 50-64    | 54.0 (52.4 - 55.6)  | 56.4 (48.8 - 63.4)    | 50.6 (45.9 - 55.0)    | 46.9 (40.9 - 52.8)    |
|                                      | 65-79    | 41.6 (40.4 - 42.8)  | 41.1 (35.4 - 46.7)    | 33.9 (30.8 - 36.9)    | 35.6 (31.8 - 39.4)    |
|                                      | 80-99    | 20.7 (19.5 - 21.9)  | 17.6 (11.6 - 24.6)    | 17.5 (14.6 - 20.7)    | 18.6 (14.5 - 23.2)    |
| Missing                              | All ages | 68.8 (68.1 - 69.6)  | 69.8 (62.7 - 75.9)    | 57.6 (53.1 - 61.8)    | 65.8 (62.0 - 69.2)    |
|                                      | 15-49    | 84.3 (82.0 - 86.3)  | 100.0 (100.0 - 100.0) | 100.0 (100.0 - 100.0) | 95.3 (85.8 - 98.5)    |
|                                      | 50-64    | 78.8 (77.2 - 80.3)  | 86.6 (53.4 - 96.8)    | 66.0 (51.8 - 76.9)    | 80.5 (72.1 - 86.6)    |
|                                      | 65-79    | 68.4 (67.2 - 69.5)  | 55.3 (44.8 - 64.6)    | 43.0 (37.3 - 48.5)    | 58.9 (52.6 - 64.6)    |
|                                      | 80-99    | 41.9 (40.6 - 43.1)  | 37.4 (29.9 - 45.0)    | 37.8 (33.6 - 41.9)    | 37.7 (32.1 - 43.2)    |

Abbreviation: NS = net survival, CI = confidence interval

All ages=Age-standardised

<sup>‡</sup> Model1: Age spline with mapped SEER stage as time-dependent covariate

<sup>¶</sup> Model2: Age spline allowing separate models for each stage category

**Supplementary Table 13B.** Age-standardised and age-specific five-year net survival (%) by stage at diagnosis (without imputation) for individual registries in United Kingdom for colon cancer patients diagnosed during 2010-2014

| Stage                                |          | England            | Northern Ireland      | Scotland              | Wales                 |
|--------------------------------------|----------|--------------------|-----------------------|-----------------------|-----------------------|
|                                      |          | 5-year NS (95% CI) | 5-year NS (95% CI)    | 5-year NS (95% CI)    | 5-year NS (95% CI)    |
| All patients <sup>†</sup>            | All ages | 59.0 (58.6 - 59.4) | 62.5 (60.5 - 64.6)    | 59.7 (58.5 - 60.9)    | 56.8 (55.2 - 58.3)    |
|                                      | 15-49    | 67.0 (65.7 - 68.3) | 71.3 (64.8 - 76.9)    | 64.3 (59.9 - 68.4)    | 70.2 (64.5 - 75.2)    |
|                                      | 50-64    | 63.9 (63.1 - 64.6) | 67.5 (63.7 - 71.0)    | 66.2 (64.1 - 68.2)    | 62.2 (59.3 - 65.0)    |
|                                      | 65-79    | 61.0 (60.4 - 61.6) | 61.1 (58.0 - 64.0)    | 60.9 (59.2 - 62.5)    | 54.9 (52.7 - 57.1)    |
|                                      | 80-99    | 41.1 (40.2 - 42.0) | 49.7 (43.7 - 55.4)    | 41.1 (38.2 - 44.0)    | 41.5 (37.8 - 45.2)    |
| <b>TNM Stage<sup>‡</sup></b>         |          |                    |                       |                       |                       |
| Stage I                              | All ages | 95.4 (93.5 - 96.7) | 100.0 (100.0 - 100.0) | 98.9 (88.1 - 99.9)    | 93.7 (89.1 - 96.4)    |
|                                      | 15-49    | 96.0 (89.4 - 98.5) | 100.0 (100.0 - 100.0) | 98.8 (60.0 - 100.0)   | 100.0 (100.0 - 100.0) |
|                                      | 50-64    | 97.9 (95.2 - 99.1) | 95.6 (84.6 - 98.8)    | 98.9 (91.7 - 99.9)    | 99.7 (0.0 - 100.0)    |
|                                      | 65-79    | 96.5 (93.5 - 98.1) | 96.5 (82.8 - 99.3)    | 100.0 (100.0 - 100.0) | 89.6 (83.2 - 93.6)    |
|                                      | 80-99    | 87.8 (79.5 - 92.9) | 100.0 (100.0 - 100.0) | 93.7 (62.9 - 99.1)    | 87.7 (60.9 - 96.6)    |
| Stage II                             | All ages | 87.3 (86.0 - 88.4) | 91.6 (87.5 - 94.4)    | 89.3 (87.1 - 91.1)    | 79.8 (76.8 - 82.4)    |
|                                      | 15-49    | 90.4 (86.2 - 93.3) | 89.1 (75.9 - 95.3)    | 89.0 (80.6 - 93.9)    | 92.0 (80.0 - 97.0)    |
|                                      | 50-64    | 89.1 (86.9 - 90.8) | 90.9 (84.5 - 94.8)    | 90.9 (87.6 - 93.3)    | 81.1 (75.5 - 85.5)    |
|                                      | 65-79    | 87.3 (85.5 - 88.9) | 89.0 (83.1 - 92.9)    | 87.1 (84.1 - 89.6)    | 76.3 (71.8 - 80.1)    |
|                                      | 80-99    | 81.9 (77.5 - 85.5) | 100.0 (100.0 - 100.0) | 92.5 (80.5 - 97.2)    | 73.2 (63.4 - 80.8)    |
| Stage III                            | All ages | 64.9 (63.5 - 66.3) | 68.3 (64.1 - 72.1)    | 65.0 (62.6 - 67.3)    | 62.1 (59.1 - 64.9)    |
|                                      | 15-49    | 76.1 (71.5 - 80.1) | 83.0 (68.7 - 91.1)    | 67.2 (59.3 - 73.9)    | 71.4 (58.7 - 80.8)    |
|                                      | 50-64    | 71.4 (68.9 - 73.8) | 77.0 (70.2 - 82.4)    | 68.5 (64.6 - 72.0)    | 68.7 (63.6 - 73.3)    |
|                                      | 65-79    | 65.5 (63.5 - 67.5) | 61.6 (55.2 - 67.5)    | 65.0 (61.5 - 68.2)    | 60.2 (55.9 - 64.2)    |
|                                      | 80-99    | 44.1 (40.1 - 48.0) | 58.4 (43.8 - 70.4)    | 56.4 (48.2 - 63.8)    | 47.8 (39.2 - 55.9)    |
| Stage IV                             | All ages | 11.2 (10.3 - 12.1) | 8.1 (6.1 - 10.3)      | 8.1 (6.9 - 9.5)       | 7.9 (5.9 - 10.2)      |
|                                      | 15-49    | 13.3 (9.5 - 17.7)  | 3.1 (0.6 - 9.7)       | 14.6 (9.1 - 21.3)     | 12.6 (5.4 - 22.9)     |
|                                      | 50-64    | 15.5 (13.7 - 17.4) | 14.4 (9.5 - 20.2)     | 11.6 (8.9 - 14.6)     | 9.6 (5.8 - 14.4)      |
|                                      | 65-79    | 10.2 (9.0 - 11.5)  | 7.3 (4.7 - 10.6)      | 5.6 (4.2 - 7.3)       | 6.8 (4.4 - 9.9)       |
|                                      | 80-99    | 4.0 (2.8 - 5.5)    | 1.0 (0.1 - 3.8)       | 2.5 (1.2 - 4.5)       | 2.3 (0.5 - 7.0)       |
| Missing                              | All ages | 66.0 (62.4 - 69.4) | 55.8 (48.9 - 62.2)    | 33.0 (28.9 - 37.3)    | 49.5 (45.5 - 53.3)    |
|                                      | 15-49    | 70.3 (68.3 - 72.2) | 95.7 (67.7 - 99.5)    | 89.5 (68.8 - 96.7)    | 84.3 (74.0 - 90.8)    |
|                                      | 50-64    | 63.3 (62.0 - 64.6) | 79.3 (54.2 - 91.6)    | 42.9 (32.0 - 53.4)    | 64.7 (55.5 - 72.4)    |
|                                      | 65-79    | 56.4 (55.4 - 57.4) | 36.7 (27.6 - 45.8)    | 18.5 (14.7 - 22.7)    | 45.6 (39.4 - 51.6)    |
|                                      | 80-99    | 30.4 (29.3 - 31.5) | 10.9 (6.4 - 16.8)     | 8.2 (5.7 - 11.4)      | 15.2 (10.8 - 20.4)    |
| <b>Mapped SEER stage<sup>‡</sup></b> |          |                    |                       |                       |                       |
| Localised                            | All ages | 93.8 (92.8 - 94.7) | 97.5 (92.4 - 99.2)    | 92.8 (91.1 - 94.2)    | 84.4 (82.1 - 86.5)    |
|                                      | 15-49    | 94.4 (90.8 - 96.6) | 95.8 (84.3 - 98.9)    | 92.3 (86.3 - 95.8)    | 94.7 (85.7 - 98.1)    |
|                                      | 50-64    | 95.3 (93.8 - 96.4) | 94.2 (88.7 - 97.1)    | 94.0 (91.7 - 95.6)    | 87.4 (83.4 - 90.6)    |
|                                      | 65-79    | 94.3 (92.8 - 95.5) | 93.6 (88.2 - 96.6)    | 92.6 (90.2 - 94.4)    | 81.1 (77.6 - 84.1)    |
|                                      | 80-99    | 89.4 (85.1 - 92.5) | 100.0 (100.0 - 100.0) | 91.2 (82.4 - 95.7)    | 77.1 (68.4 - 83.7)    |
| Regional                             | All ages | 65.2 (64.0 - 66.4) | 71.6 (67.9 - 75.0)    | 64.8 (62.4 - 67.0)    | 62.1 (59.1 - 64.9)    |
|                                      | 15-49    | 77.0 (73.2 - 80.3) | 82.8 (71.4 - 90.0)    | 67.5 (59.6 - 74.2)    | 71.4 (58.7 - 80.8)    |
|                                      | 50-64    | 72.3 (70.2 - 74.3) | 79.2 (73.2 - 83.9)    | 68.5 (64.7 - 72.0)    | 68.7 (63.6 - 73.3)    |
|                                      | 65-79    | 64.7 (63.0 - 66.4) | 66.5 (60.9 - 71.5)    | 64.8 (61.4 - 68.0)    | 60.2 (55.9 - 64.2)    |
|                                      | 80-99    | 45.3 (42.0 - 48.6) | 62.8 (50.1 - 73.1)    | 54.9 (47.0 - 62.1)    | 47.8 (39.2 - 55.9)    |
| Distant                              | All ages | 11.0 (10.1 - 12.0) | 8.3 (6.3 - 10.6)      | 8.1 (6.9 - 9.5)       | 7.9 (5.9 - 10.2)      |
|                                      | 15-49    | 12.2 (8.3 - 16.8)  | 3.1 (0.6 - 9.7)       | 15.2 (9.5 - 22.1)     | 12.6 (5.4 - 22.9)     |
|                                      | 50-64    | 15.3 (13.4 - 17.2) | 14.3 (9.5 - 20.1)     | 11.6 (8.9 - 14.7)     | 9.6 (5.8 - 14.4)      |
|                                      | 65-79    | 10.2 (8.9 - 11.5)  | 7.5 (4.9 - 10.9)      | 5.5 (4.2 - 7.2)       | 6.8 (4.4 - 9.9)       |
|                                      | 80-99    | 3.9 (2.7 - 5.5)    | 1.1 (0.2 - 4.3)       | 2.4 (1.2 - 4.5)       | 2.3 (0.5 - 7.0)       |
| Missing                              | All ages | 52.2 (51.5 - 52.9) | 57.2 (50.0 - 63.8)    | 33.3 (29.0 - 37.7)    | 49.5 (45.5 - 53.3)    |
|                                      | 15-49    | 65.7 (63.5 - 67.9) | 100.0 (100.0 - 100.0) | 91.2 (68.7 - 97.8)    | 84.4 (74.0 - 90.8)    |
|                                      | 50-64    | 59.5 (58.1 - 60.9) | 79.5 (50.2 - 92.7)    | 43.7 (32.3 - 54.5)    | 64.7 (55.5 - 72.4)    |
|                                      | 65-79    | 53.2 (52.1 - 54.2) | 34.1 (25.0 - 43.3)    | 18.4 (14.5 - 22.6)    | 45.6 (39.4 - 51.6)    |
|                                      | 80-99    | 27.9 (26.9 - 29.0) | 10.2 (5.8 - 16.0)     | 8.4 (5.8 - 11.6)      | 15.2 (10.8 - 20.4)    |

Abbreviation: NS = net survival, CI = confidence interval  
All ages=Age-standardised

<sup>†</sup> Model1: Age spline with mapped SEER stage as time-dependent covariate

<sup>‡</sup> Model2: Age spline allowing separate models for each stage category

**Supplementary Table 14A.** Age-standardised and age-specific one-year net survival (%) by stage at diagnosis (without imputation) for individual registries in United Kingdom for rectal cancer patients diagnosed during 2010-2014

| Stage                                |          | England            | Northern Ireland      | Scotland              | Wales                 |
|--------------------------------------|----------|--------------------|-----------------------|-----------------------|-----------------------|
|                                      |          | 1-year NS (95% CI) | 1-year NS (95% CI)    | 1-year NS (95% CI)    | 1-year NS (95% CI)    |
| All patients <sup>†</sup>            | All ages | 84.9 (84.4 - 85.3) | 84.7 (82.1 - 86.9)    | 84.6 (83.2 - 85.9)    | 84.9 (83.3 - 86.4)    |
|                                      | 15-49    | 90.8 (89.5 - 92.0) | 85.7 (76.5 - 91.5)    | 89.3 (84.6 - 92.7)    | 92.3 (86.3 - 95.7)    |
|                                      | 50-64    | 90.8 (90.2 - 91.4) | 93.6 (90.0 - 95.9)    | 91.2 (89.1 - 92.9)    | 90.2 (87.4 - 92.4)    |
|                                      | 65-79    | 85.0 (84.3 - 85.6) | 82.6 (78.6 - 85.9)    | 84.7 (82.6 - 86.6)    | 84.7 (82.2 - 86.9)    |
|                                      | 80-99    | 69.7 (68.4 - 70.9) | 71.8 (63.1 - 78.7)    | 69.4 (65.0 - 73.3)    | 70.2 (65.0 - 74.7)    |
| <b>TNM Stage<sup>‡</sup></b>         |          |                    |                       |                       |                       |
| Stage I                              | All ages | 98.2 (97.5 - 98.6) | 99.8 (0.0 - 100.0)    | 100.0 (100.0 - 100.0) | 97.9 (94.4 - 99.2)    |
|                                      | 15-49    | 98.8 (96.3 - 99.6) | 100.0 (100.0 - 100.0) | 100.0 (100.0 - 100.0) | 100.0 (100.0 - 100.0) |
|                                      | 50-64    | 99.1 (98.2 - 99.5) | 100.0 (100.0 - 100.0) | 100.0 (0.0 - 100.0)   | 98.9 (89.7 - 99.9)    |
|                                      | 65-79    | 98.4 (97.5 - 99.0) | 97.2 (86.6 - 99.4)    | 100.0 (100.0 - 100.0) | 97.8 (91.1 - 99.5)    |
|                                      | 80-99    | 95.1 (92.4 - 96.9) | 100.0 (100.0 - 100.0) | 100.0 (100.0 - 100.0) | 93.4 (70.3 - 98.7)    |
| Stage II                             | All ages | 93.5 (92.6 - 94.2) | 97.2 (92.5 - 98.9)    | 99.0 (95.6 - 99.8)    | 89.7 (85.9 - 92.5)    |
|                                      | 15-49    | 98.4 (95.4 - 99.5) | 100.0 (100.0 - 100.0) | 100.0 (100.0 - 100.0) | 100.0 (100.0 - 100.0) |
|                                      | 50-64    | 97.5 (96.2 - 98.3) | 100.0 (100.0 - 100.0) | 98.6 (94.6 - 99.6)    | 91.9 (84.3 - 95.9)    |
|                                      | 65-79    | 92.3 (90.9 - 93.5) | 96.0 (87.2 - 98.8)    | 98.4 (93.2 - 99.6)    | 86.5 (80.0 - 90.9)    |
|                                      | 80-99    | 84.9 (82.0 - 87.4) | 89.2 (63.4 - 97.2)    | 100.0 (100.0 - 100.0) | 86.3 (73.4 - 93.2)    |
| Stage III                            | All ages | 91.9 (91.2 - 92.5) | 90.9 (86.7 - 93.8)    | 94.3 (91.5 - 96.1)    | 93.8 (91.6 - 95.4)    |
|                                      | 15-49    | 95.4 (93.5 - 96.7) | 91.0 (77.4 - 96.6)    | 96.3 (88.1 - 98.9)    | 97.2 (88.2 - 99.4)    |
|                                      | 50-64    | 96.0 (95.1 - 96.7) | 97.7 (92.0 - 99.3)    | 98.2 (94.3 - 99.4)    | 96.2 (92.7 - 98.0)    |
|                                      | 65-79    | 91.5 (90.4 - 92.5) | 87.7 (80.9 - 92.2)    | 93.8 (89.6 - 96.3)    | 94.0 (90.7 - 96.2)    |
|                                      | 80-99    | 82.2 (79.6 - 84.5) | 88.5 (61.2 - 97.0)    | 87.5 (74.6 - 94.1)    | 86.2 (77.1 - 91.9)    |
| Stage IV                             | All ages | 55.4 (53.9 - 56.8) | 46.8 (38.6 - 54.5)    | 50.4 (46.3 - 54.3)    | 52.4 (46.9 - 57.5)    |
|                                      | 15-49    | 69.2 (64.1 - 73.7) | 49.6 (24.5 - 70.5)    | 63.1 (48.8 - 74.4)    | 63.0 (39.5 - 79.4)    |
|                                      | 50-64    | 66.5 (63.9 - 69.0) | 63.8 (47.1 - 76.5)    | 61.4 (53.8 - 68.1)    | 59.6 (48.9 - 68.7)    |
|                                      | 65-79    | 53.1 (50.9 - 55.2) | 46.4 (34.8 - 57.2)    | 46.6 (40.1 - 52.8)    | 52.0 (44.3 - 59.1)    |
|                                      | 80-99    | 32.0 (29.1 - 35.0) | 16.2 (4.8 - 33.6)     | 32.3 (24.1 - 40.7)    | 30.7 (20.0 - 42.0)    |
| Missing                              | All ages | 81.1 (80.1 - 82.0) | 62.0 (49.0 - 72.6)    | 75.8 (71.6 - 79.4)    | 77.3 (71.2 - 82.2)    |
|                                      | 15-49    | 91.8 (89.0 - 93.9) | 83.7 (27.7 - 97.6)    | 87.2 (64.9 - 95.8)    | 88.7 (41.7 - 98.4)    |
|                                      | 50-64    | 89.7 (88.2 - 91.1) | 76.3 (42.2 - 91.9)    | 91.3 (82.9 - 95.6)    | 94.6 (76.8 - 98.8)    |
|                                      | 65-79    | 80.7 (79.2 - 82.2) | 55.5 (37.2 - 70.5)    | 66.2 (59.1 - 72.3)    | 75.9 (64.6 - 84.0)    |
|                                      | 80-99    | 58.9 (56.5 - 61.1) | 49.9 (33.6 - 64.3)    | 60.7 (53.6 - 67.1)    | 44.3 (33.2 - 54.9)    |
| <b>Mapped SEER stage<sup>‡</sup></b> |          |                    |                       |                       |                       |
| Localised                            | All ages | 96.8 (96.3 - 97.2) | 98.3 (94.9 - 99.5)    | 99.7 (94.9 - 100.0)   | 93.6 (91.4 - 95.3)    |
|                                      | 15-49    | 98.8 (97.2 - 99.5) | 100.0 (100.0 - 100.0) | 100.0 (100.0 - 100.0) | 100.0 (100.0 - 100.0) |
|                                      | 50-64    | 98.7 (98.0 - 99.1) | 99.9 (0.0 - 100.0)    | 99.3 (96.8 - 99.9)    | 95.5 (91.3 - 97.7)    |
|                                      | 65-79    | 96.7 (96.0 - 97.3) | 96.5 (91.0 - 98.7)    | 99.3 (94.9 - 99.9)    | 92.2 (88.4 - 94.8)    |
|                                      | 80-99    | 92.0 (90.1 - 93.5) | 98.4 (16.6 - 100.0)   | 100.0 (100.0 - 100.0) | 89.0 (79.3 - 94.3)    |
| Regional                             | All ages | 91.2 (90.5 - 91.8) | 90.0 (85.9 - 93.0)    | 93.0 (90.4 - 94.9)    | 93.8 (91.6 - 95.4)    |
|                                      | 15-49    | 95.3 (93.6 - 96.6) | 89.1 (75.4 - 95.4)    | 96.2 (88.1 - 98.9)    | 97.2 (88.2 - 99.4)    |
|                                      | 50-64    | 95.8 (94.9 - 96.5) | 97.1 (91.8 - 99.0)    | 98.3 (94.6 - 99.5)    | 96.2 (92.7 - 98.0)    |
|                                      | 65-79    | 90.7 (89.7 - 91.7) | 87.5 (80.9 - 91.9)    | 91.5 (87.5 - 94.3)    | 94.0 (90.7 - 96.2)    |
|                                      | 80-99    | 80.1 (77.7 - 82.3) | 84.9 (62.1 - 94.5)    | 85.2 (73.9 - 91.9)    | 86.2 (77.1 - 91.9)    |
| Distant                              | All ages | 55.5 (54.0 - 56.9) | 46.8 (38.7 - 54.6)    | 50.9 (46.7 - 54.9)    | 52.4 (46.9 - 57.5)    |
|                                      | 15-49    | 69.2 (64.1 - 73.8) | 49.6 (24.5 - 70.5)    | 65.0 (51.2 - 75.9)    | 63.0 (39.5 - 79.4)    |
|                                      | 50-64    | 66.6 (63.9 - 69.1) | 62.9 (46.0 - 75.8)    | 61.2 (53.6 - 67.9)    | 59.6 (48.9 - 68.7)    |
|                                      | 65-79    | 53.1 (50.9 - 55.3) | 47.1 (35.5 - 57.8)    | 46.5 (39.9 - 52.8)    | 52.0 (44.3 - 59.1)    |
|                                      | 80-99    | 32.3 (29.3 - 35.3) | 16.2 (4.8 - 33.6)     | 34.3 (26.0 - 42.8)    | 30.7 (20.0 - 42.0)    |
| Missing                              | All ages | 78.9 (77.9 - 79.9) | 68.2 (55.2 - 78.2)    | 71.9 (66.9 - 76.3)    | 77.3 (71.2 - 82.2)    |
|                                      | 15-49    | 90.8 (87.7 - 93.2) | 100.0 (100.0 - 100.0) | 86.0 (62.1 - 95.4)    | 88.7 (41.7 - 98.4)    |
|                                      | 50-64    | 88.1 (86.3 - 89.7) | 86.4 (31.8 - 98.1)    | 89.5 (79.8 - 94.7)    | 94.6 (76.8 - 98.8)    |
|                                      | 65-79    | 78.0 (76.2 - 79.6) | 53.5 (33.7 - 69.8)    | 61.5 (53.5 - 68.6)    | 75.9 (64.6 - 84.0)    |
|                                      | 80-99    | 56.1 (53.7 - 58.5) | 48.6 (31.9 - 63.4)    | 55.3 (47.6 - 62.3)    | 44.3 (33.2 - 54.9)    |

Abbreviation: NS = net survival, CI = confidence interval  
All ages=Age-standardised

<sup>†</sup> Model1: Age spline with mapped SEER stage as time-dependent covariate

<sup>‡</sup> Model2: Age spline allowing separate models for each stage category

**Supplementary Table 14B.** Age-standardised and age-specific five-year net survival (%) by stage at diagnosis (without imputation) for individual registries in United Kingdom for rectal cancer patients diagnosed during 2010-2014

| Stage                                |          | England            | Northern Ireland      | Scotland              | Wales                 |
|--------------------------------------|----------|--------------------|-----------------------|-----------------------|-----------------------|
|                                      |          | 5-year NS (95% CI) | 5-year NS (95% CI)    | 5-year NS (95% CI)    | 5-year NS (95% CI)    |
| All patients <sup>‡</sup>            | All ages | 62.1 (61.5 - 62.8) | 60.7 (57.2 - 64.0)    | 62.8 (60.9 - 64.7)    | 60.8 (58.4 - 63.1)    |
|                                      | 15-49    | 68.7 (66.7 - 70.6) | 65.8 (55.2 - 74.5)    | 69.5 (63.3 - 75.0)    | 72.6 (64.2 - 79.3)    |
|                                      | 50-64    | 70.3 (69.3 - 71.3) | 68.7 (63.2 - 73.6)    | 70.2 (67.2 - 73.0)    | 66.7 (62.7 - 70.3)    |
|                                      | 65-79    | 63.6 (62.6 - 64.5) | 57.9 (52.8 - 62.7)    | 65.1 (62.2 - 67.8)    | 61.8 (58.3 - 65.1)    |
|                                      | 80-99    | 38.9 (37.2 - 40.6) | 50.8 (38.5 - 61.9)    | 40.5 (35.0 - 46.0)    | 37.8 (30.7 - 44.8)    |
| <b>TNM Stage<sup>¶</sup></b>         |          |                    |                       |                       |                       |
| Stage I                              | All ages | 93.2 (90.9 - 94.9) | 96.7 (79.2 - 99.5)    | 97.7 (90.9 - 99.5)    | 95.6 (87.6 - 98.5)    |
|                                      | 15-49    | 98.0 (94.0 - 99.3) | 100.0 (100.0 - 100.0) | 94.8 (80.5 - 98.7)    | 95.1 (56.5 - 99.6)    |
|                                      | 50-64    | 95.1 (92.0 - 97.0) | 94.2 (79.5 - 98.5)    | 95.0 (90.1 - 97.5)    | 88.9 (80.5 - 93.9)    |
|                                      | 65-79    | 93.4 (90.3 - 95.6) | 93.4 (75.2 - 98.4)    | 97.0 (88.1 - 99.3)    | 96.6 (81.1 - 99.4)    |
|                                      | 80-99    | 85.8 (74.2 - 92.5) | 100.0 (100.0 - 100.0) | 100.0 (100.0 - 100.0) | 100.0 (100.0 - 100.0) |
| Stage II                             | All ages | 76.9 (74.0 - 79.4) | 81.0 (69.1 - 88.7)    | 86.0 (81.1 - 89.7)    | 72.0 (66.5 - 76.8)    |
|                                      | 15-49    | 82.7 (73.9 - 88.7) | 86.6 (52.8 - 96.8)    | 88.8 (74.7 - 95.3)    | 94.3 (55.2 - 99.4)    |
|                                      | 50-64    | 84.5 (80.5 - 87.8) | 85.6 (73.9 - 92.3)    | 82.4 (76.2 - 87.1)    | 79.6 (70.1 - 86.4)    |
|                                      | 65-79    | 77.9 (74.1 - 81.2) | 84.1 (71.6 - 91.4)    | 87.4 (80.6 - 91.9)    | 71.1 (62.6 - 77.9)    |
|                                      | 80-99    | 55.5 (43.4 - 66.0) | 60.3 (29.7 - 81.0)    | 90.9 (42.5 - 98.9)    | 39.7 (23.9 - 55.0)    |
| Stage III                            | All ages | 66.8 (64.6 - 68.9) | 60.4 (54.1 - 66.1)    | 67.2 (62.9 - 71.2)    | 66.1 (61.5 - 70.2)    |
|                                      | 15-49    | 76.1 (70.3 - 81.0) | 64.6 (48.3 - 76.9)    | 74.4 (62.5 - 83.0)    | 72.6 (58.4 - 82.6)    |
|                                      | 50-64    | 78.1 (74.9 - 80.9) | 73.6 (64.9 - 80.5)    | 70.3 (64.2 - 75.6)    | 69.4 (62.3 - 75.4)    |
|                                      | 65-79    | 65.7 (62.3 - 69.0) | 54.1 (45.4 - 62.0)    | 69.6 (63.3 - 75.1)    | 64.4 (57.7 - 70.2)    |
|                                      | 80-99    | 40.8 (33.9 - 47.5) | 58.2 (26.0 - 80.4)    | 51.5 (34.6 - 66.1)    | 57.3 (37.8 - 72.7)    |
| Stage IV                             | All ages | 12.8 (10.9 - 14.8) | 4.9 (2.4 - 8.8)       | 8.8 (6.3 - 11.7)      | 7.7 (4.9 - 11.2)      |
|                                      | 15-49    | 21.0 (13.6 - 29.5) | *                     | 22.6 (11.3 - 36.2)    | 22.1 (6.0 - 44.3)     |
|                                      | 50-64    | 16.6 (13.0 - 20.5) | 1.9 (0.2 - 8.4)       | 13.7 (7.9 - 21.2)     | 11.2 (5.4 - 19.3)     |
|                                      | 65-79    | 11.1 (8.3 - 14.3)  | 7.9 (3.5 - 14.4)      | 4.8 (2.4 - 8.5)       | 6.3 (3.2 - 10.9)      |
|                                      | 80-99    | 3.7 (1.8 - 6.9)    | *                     | 2.5 (0.7 - 6.7)       | *                     |
| Missing                              | All ages | 77.3 (71.2 - 82.2) | 40.7 (29.6 - 51.5)    | 46.3 (41.7 - 50.8)    | 52.0 (45.8 - 57.8)    |
|                                      | 15-49    | 69.6 (66.6 - 72.4) | 84.6 (25.5 - 98.0)    | 65.0 (44.1 - 79.7)    | 73.6 (45.7 - 88.7)    |
|                                      | 50-64    | 69.5 (67.9 - 71.1) | 58.2 (29.7 - 78.6)    | 66.0 (56.3 - 74.1)    | 63.6 (50.8 - 73.9)    |
|                                      | 65-79    | 59.4 (57.9 - 60.9) | 24.1 (12.3 - 38.0)    | 35.1 (28.8 - 41.4)    | 54.0 (43.3 - 63.5)    |
|                                      | 80-99    | 30.3 (28.4 - 32.3) | 20.5 (7.2 - 38.5)     | 18.0 (12.3 - 24.7)    | 11.5 (5.9 - 19.1)     |
| <b>Mapped SEER stage<sup>¶</sup></b> |          |                    |                       |                       |                       |
| Localised                            | All ages | 87.7 (86.0 - 89.3) | 88.5 (82.7 - 92.5)    | 92.0 (89.0 - 94.2)    | 82.7 (78.8 - 86.0)    |
|                                      | 15-49    | 95.6 (92.7 - 97.4) | 93.7 (72.4 - 98.7)    | 91.8 (83.4 - 96.1)    | 94.4 (72.9 - 99.0)    |
|                                      | 50-64    | 92.3 (90.0 - 94.0) | 88.3 (80.2 - 93.2)    | 89.4 (85.8 - 92.2)    | 84.3 (78.3 - 88.8)    |
|                                      | 65-79    | 88.3 (86.0 - 90.3) | 88.0 (79.0 - 93.3)    | 92.5 (88.2 - 95.3)    | 83.6 (77.8 - 88.0)    |
|                                      | 80-99    | 72.7 (64.6 - 79.2) | 86.1 (48.2 - 97.0)    | 98.3 (0.0 - 100.0)    | 66.3 (49.2 - 78.9)    |
| Regional                             | All ages | 65.2 (63.2 - 67.1) | 60.2 (54.2 - 65.7)    | 66.4 (62.1 - 70.2)    | 66.1 (61.5 - 70.2)    |
|                                      | 15-49    | 72.6 (66.7 - 77.6) | 64.7 (49.1 - 76.6)    | 74.5 (62.6 - 83.1)    | 72.6 (58.4 - 82.6)    |
|                                      | 50-64    | 76.5 (73.5 - 79.1) | 72.3 (63.8 - 79.2)    | 70.5 (64.4 - 75.8)    | 69.4 (62.3 - 75.4)    |
|                                      | 65-79    | 64.4 (61.3 - 67.4) | 54.1 (45.7 - 61.8)    | 67.8 (61.7 - 73.2)    | 64.4 (57.7 - 70.2)    |
|                                      | 80-99    | 39.7 (33.9 - 45.5) | 59.3 (29.2 - 80.1)    | 50.1 (33.9 - 64.2)    | 57.3 (37.8 - 72.7)    |
| Distant                              | All ages | 12.6 (10.7 - 14.7) | 5.0 (2.4 - 9.0)       | 8.7 (6.2 - 11.7)      | 7.7 (4.9 - 11.2)      |
|                                      | 15-49    | 19.2 (11.3 - 28.6) | *                     | 23.9 (12.1 - 37.8)    | 22.1 (6.0 - 44.3)     |
|                                      | 50-64    | 17.0 (13.4 - 21.0) | 2.1 (0.2 - 9.2)       | 13.5 (7.7 - 20.8)     | 11.2 (5.4 - 19.3)     |
|                                      | 65-79    | 10.8 (7.9 - 14.1)  | 7.8 (3.5 - 14.3)      | 4.8 (2.4 - 8.5)       | 6.3 (3.2 - 10.9)      |
|                                      | 80-99    | 3.7 (1.8 - 6.8)    | *                     | 2.8 (0.7 - 7.3)       | *                     |
| Missing                              | All ages | 57.2 (56.2 - 58.2) | 49.8 (37.4 - 60.9)    | 43.7 (38.9 - 48.4)    | 52.0 (45.8 - 57.8)    |
|                                      | 15-49    | 68.1 (64.9 - 71.1) | 100.0 (100.0 - 100.0) | 63.6 (42.4 - 78.8)    | 73.6 (45.7 - 88.7)    |
|                                      | 50-64    | 67.6 (65.8 - 69.2) | 71.3 (33.4 - 90.1)    | 64.1 (54.1 - 72.5)    | 63.6 (50.8 - 73.9)    |
|                                      | 65-79    | 57.0 (55.4 - 58.6) | 27.8 (13.8 - 43.6)    | 31.9 (25.7 - 38.3)    | 54.0 (43.3 - 63.5)    |
|                                      | 80-99    | 28.8 (26.9 - 30.8) | 16.4 (4.9 - 33.9)     | 15.5 (10.4 - 21.6)    | 11.5 (5.9 - 19.1)     |

Abbreviation: NS = net survival, CI = confidence interval

All ages=Age-standardised

<sup>‡</sup> Model1: Age spline with mapped SEER stage as time-dependent covariate

<sup>¶</sup> Model2: Age spline allowing separate models for each stage category

\* Not possible to estimate

**Supplementary Table 15.** Median age, number of cases and proportions (%) of colon and rectal cancers by imputed stage for individual registries in Canada, 2010-2014

| Country                   | Colon cancer |                  |                     |             |             |                  |                     |             | Rectal cancer |                  |                     |             |             |                  |                     |             |
|---------------------------|--------------|------------------|---------------------|-------------|-------------|------------------|---------------------|-------------|---------------|------------------|---------------------|-------------|-------------|------------------|---------------------|-------------|
|                           | TNM stage    |                  |                     |             | Mapped SEER |                  |                     |             | TNM stage     |                  |                     |             | Mapped SEER |                  |                     |             |
|                           | Stage        | Median age (IQR) | Number of cases (%) | Imputed (%) | Stage       | Median age (IQR) | Number of cases (%) | Imputed (%) | Stage         | Median age (IQR) | Number of cases (%) | Imputed (%) | Stage       | Median age (IQR) | Number of cases (%) | Imputed (%) |
| Alberta                   | All          | 69 (59-79)       | 6,624               |             | All         | 69 (59-79)       | 6,624               |             | All           | 65 (56-75)       | 2,516               |             | All         | 65 (56-75)       | 2,516               |             |
|                           | I            | 68 (58-77)       | 1405 (22.0)         | 23.6        | Localised   | 69 (60-78)       | 2268 (35.2)         | 36.7        | I             | 65 (56-75)       | 585 (24.7)          | 25.2        | Localised   | 65 (56-75)       | 828 (33.6)          | 34.1        |
|                           | II           | 72 (62-80)       | 1698 (26.6)         | 25.6        | Regional    | 69 (59-79)       | 2483 (38.5)         | 37.6        | II            | 67 (57-76)       | 438 (18.5)          | 17.1        | Regional    | 64 (56-74)       | 1128 (45.8)         | 45.5        |
|                           | III          | 68 (58-78)       | 1700 (26.6)         | 26.5        | Distant     | 69 (59-79)       | 1696 (26.3)         | 25.6        | III           | 64 (55-73)       | 871 (36.8)          | 37.5        | Distant     | 64 (55-76)       | 509 (20.6)          | 20.5        |
|                           | IV           | 68 (59-79)       | 1590 (24.9)         | 24.3        | Missing     | 84 (77-89)       | 177 (2.7)           |             | IV            | 64 (55-76)       | 476 (20.1)          | 20.2        | Missing     | 82 (66-88)       | 51 (2.0)            |             |
| British Columbia          | All          | 72 (62-80)       | 10,787              |             | All         | 72 (62-80)       | 10,787              |             | All           | 67 (58-76)       | 3,882               |             | All         | 67 (58-76)       | 3,882               |             |
|                           | I            | 71 (63-79)       | 1889 (19.6)         | 21.3        | Localised   | 71 (63-80)       | 3538 (35.4)         | 36.5        | I             | 69 (60-77)       | 591 (18.6)          | 19.3        | Localised   | 68 (60-77)       | 1260 (35.0)         | 35.9        |
|                           | II           | 73 (64-81)       | 2730 (28.3)         | 27.5        | Regional    | 72 (62-80)       | 4207 (42.0)         | 40.6        | II            | 68 (59-77)       | 804 (25.3)          | 24.1        | Regional    | 66 (58-75)       | 1672 (46.5)         | 44.8        |
|                           | III          | 71 (62-79)       | 2843 (29.4)         | 28.3        | Distant     | 69 (60-79)       | 2260 (22.6)         | 23.0        | III           | 65 (57-74)       | 1152 (36.2)         | 36.4        | Distant     | 65 (56-75)       | 663 (18.4)          | 19.4        |
|                           | IV           | 69 (60-79)       | 2192 (22.7)         | 22.9        | Missing     | 81 (69-88)       | 782 (7.2)           |             | IV            | 65 (57-75)       | 633 (19.9)          | 20.3        | Missing     | 75 (61-84)       | 287 (7.4)           |             |
| Manitoba                  | All          | 72 (61-81)       | 2,818               |             | All         | 72 (61-81)       | 2,818               |             | All           | 66 (57-76)       | 1,148               |             | All         | 66 (57-76)       | 1,148               |             |
|                           | I            | 71 (61-81)       | 583 (21.3)          | 22.4        | Localised   | 72 (62-82)       | 980 (35.7)          | 36.6        | I             | 68 (56-77)       | 282 (25.7)          | 24.5        | Localised   | 68 (57-78)       | 355 (31.6)          | 29.1        |
|                           | II           | 74 (64-82)       | 813 (29.7)          | 29.2        | Regional    | 71 (62-79)       | 1153 (42.0)         | 41.3        | II            | 69 (61-80)       | 178 (16.2)          | 13.3        | Regional    | 65 (56-75)       | 530 (47.2)          | 47.9        |
|                           | III          | 70 (60-78)       | 755 (27.6)          | 27.0        | Distant     | 70 (60-80)       | 614 (22.4)          | 22.1        | III           | 64 (56-74)       | 419 (38.2)          | 40.2        | Distant     | 64 (56-73)       | 239 (21.3)          | 23.0        |
|                           | IV           | 70 (60-80)       | 586 (21.4)          | 21.3        | Missing     | 86 (81-90)       | 71 (2.5)            |             | IV            | 64 (56-73)       | 219 (19.9)          | 22.0        | Missing     | 78 (65-84)       | 24 (2.1)            |             |
| New Brunswick             | All          | 71 (62-80)       | 2,029               |             | All         | 71 (62-80)       | 2,029               |             | All           | 67 (58-75)       | 708                 |             | All         | 67 (58-75)       | 708                 |             |
|                           | I            | 70 (62-78)       | 382 (20.3)          | 20.5        | Localised   | 71 (63-79)       | 799 (42.2)          | 42.7        | I             | 69 (60-76)       | 164 (25.9)          | 25.5        | Localised   | 68 (60-77)       | 275 (42.5)          | 42.1        |
|                           | II           | 72 (64-80)       | 540 (28.6)          | 27.6        | Regional    | 70 (62-79)       | 621 (32.8)          | 31.3        | II            | 67 (59-75)       | 167 (26.3)          | 26.3        | Regional    | 64 (56-73)       | 240 (37.1)          | 36.8        |
|                           | III          | 70 (62-78)       | 495 (26.3)          | 26.2        | Distant     | 70 (61-79)       | 475 (25.1)          | 26.0        | III           | 64 (55-72)       | 174 (27.4)          | 27.2        | Distant     | 66 (60-74)       | 132 (20.4)          | 21.1        |
|                           | IV           | 70 (61-79)       | 468 (24.8)          | 25.7        | Missing     | 77 (63-86)       | 134 (6.6)           |             | IV            | 66 (61-74)       | 129 (20.3)          | 20.9        | Missing     | 68 (54-83)       | 61 (8.6)            |             |
| Newfoundland and Labrador | All          | 69 (61-77)       | 1,980               |             | All         | 69 (61-77)       | 1,980               |             | All           | 65 (57-74)       | 607                 |             | All         | 65 (57-74)       | 607                 |             |
|                           | I            | 70 (61-78)       | 403 (21.4)          | 22.2        | Localised   | 71 (62-77)       | 809 (41.9)          | 41.6        | I             | 67 (59-76)       | 127 (22.4)          | 22.3        | Localised   | 67 (59-75)       | 206 (35.0)          | 34.3        |
|                           | II           | 71 (63-77)       | 526 (28.0)          | 27.1        | Regional    | 68 (61-76)       | 695 (36.0)          | 35.5        | II            | 69 (61-75)       | 113 (19.9)          | 19.9        | Regional    | 64 (56-73)       | 253 (43.0)          | 41.4        |
|                           | III          | 68 (60-75)       | 546 (29.0)          | 28.3        | Distant     | 68 (61-76)       | 429 (22.2)          | 22.9        | III           | 62 (55-70)       | 205 (36.1)          | 36.2        | Distant     | 66 (57-73)       | 129 (21.9)          | 24.3        |
|                           | IV           | 68 (60-76)       | 406 (21.6)          | 22.3        | Missing     | 80 (71-86)       | 47 (2.4)            |             | IV            | 66 (56-73)       | 123 (21.7)          | 21.6        | Missing     | 71 (58-86)       | 19 (3.1)            |             |
| Nova Scotia               | All          | 71 (63-80)       | 2,852               |             | All         | 71 (63-80)       | 2,852               |             | All           | 67 (58-75)       | 1,042               |             | All         | 67 (58-75)       | 1,042               |             |
|                           | I            | 70 (63-78)       | 629 (22.7)          | 23.0        | Localised   | 71 (63-79)       | 840 (30.1)          | 32.2        | I             | 69 (62-77)       | 255 (25.6)          | 24.4        | Localised   | 68 (61-77)       | 319 (31.2)          | 30.9        |
|                           | II           | 72 (64-80)       | 803 (28.9)          | 28.1        | Regional    | 72 (63-80)       | 1290 (46.2)         | 43.8        | II            | 67 (60-74)       | 203 (20.3)          | 17.0        | Regional    | 66 (58-74)       | 501 (49.0)          | 47.5        |
|                           | III          | 72 (63-79)       | 723 (26.0)          | 26.2        | Distant     | 69 (60-79)       | 664 (23.8)          | 24.0        | III           | 66 (57-74)       | 351 (35.2)          | 38.0        | Distant     | 66 (56-74)       | 202 (19.8)          | 21.5        |
|                           | IV           | 69 (60-79)       | 622 (22.4)          | 22.7        | Missing     | 86 (82-91)       | 58 (2.0)            |             | IV            | 66 (56-74)       | 189 (18.9)          | 20.7        | Missing     | 75 (68-86)       | 20 (1.9)            |             |
| Ontario                   | All          | 71 (61-80)       | 28,553              |             | All         | 71 (61-80)       | 28,553              |             | All           | 66 (56-76)       | 9,294               |             | All         | 66 (56-76)       | 9,294               |             |
|                           | I            | 70 (61-79)       | 5783 (22.2)         | 21.9        | Localised   | 72 (62-80)       | 9906 (37.9)         | 38.2        | I             | 67 (58-76)       | 2373 (28.9)         | 28.0        | Localised   | 67 (57-76)       | 3277 (39.0)         | 38.2        |
|                           | II           | 74 (64-81)       | 7493 (28.8)         | 28.7        | Regional    | 71 (61-80)       | 10511 (40.2)        | 40.3        | II            | 68 (58-77)       | 1616 (19.7)         | 19.3        | Regional    | 65 (56-74)       | 3583 (42.7)         | 42.9        |
|                           | III          | 70 (61-80)       | 7380 (28.4)         | 28.9        | Distant     | 70 (60-80)       | 5705 (21.8)         | 21.6        | III           | 65 (55-74)       | 2834 (34.5)         | 35.1        | Distant     | 66 (56-77)       | 1539 (18.3)         | 18.9        |
|                           | IV           | 70 (60-79)       | 5346 (20.6)         | 20.5        | Missing     | 73 (61-83)       | 2431 (8.5)          |             | IV            | 66 (56-77)       | 1394 (17.0)         | 17.6        | Missing     | 66 (55-80)       | 895 (9.6)           |             |
| Prince Edward Island      | All          | 72 (63-79)       | 451                 |             | All         | 72 (63-79)       | 451                 |             | All           | 66 (59-75)       | 121                 |             | All         | 66 (59-75)       | 121                 |             |
|                           | I            | 68 (62-76)       | 98 (22.4)           | 22.5        | Localised   | 70 (63-77)       | 178 (40.5)          | 39.3        | I             | 67 (57-77)       | 34 (29.6)           | 30.7        | Localised   | 67 (62-75)       | 54 (45.4)           | 45.4        |
|                           | II           | 72 (63-79)       | 123 (28.1)          | 27.4        | Regional    | 72 (63-81)       | 148 (33.6)          | 35.7        | II            | 68 (63-75)       | 29 (25.2)           | 25.0        | Regional    | 66 (58-71)       | 43 (36.1)           | 37.3        |
|                           | III          | 72 (63-81)       | 109 (24.9)          | 26.4        | Distant     | 72 (63-79)       | 114 (25.9)          | 25.0        | III           | 64 (54-71)       | 32 (27.8)           | 27.2        | Distant     | 67 (48-77)       | 22 (18.5)           | 17.4        |
|                           | IV           | 72 (64-79)       | 108 (24.7)          | 23.7        | Missing     | 84 (80-89)       | 11 (2.4)            |             | IV            | 70 (49-79)       | 20 (17.4)           | 17.1        | Missing     | 86 (86-86)       | 2 (1.7)             |             |
| Saskatchewan              | All          | 71 (61-80)       | 2,655               |             | All         | 71 (61-80)       | 2,655               |             | All           | 67 (58-76)       | 953                 |             | All         | 67 (58-76)       | 953                 |             |
|                           | I            | 69 (61-78)       | 670 (26.2)          | 28.0        | Localised   | 71 (62-77)       | 1117 (43.3)         | 45.7        | I             | 68 (61-77)       | 226 (25.2)          | 25.3        | Localised   | 68 (59-76)       | 343 (37.0)          | 35.9        |
|                           | II           | 73 (64-81)       | 688 (26.9)          | 27.0        | Regional    | 71 (61-80)       | 826 (32.0)          | 30.0        | II            | 70 (60-78)       | 194 (21.6)          | 20.6        | Regional    | 66 (58-76)       | 383 (41.3)          | 40.7        |
|                           | III          | 70 (60-79)       | 610 (23.8)          | 22.3        | Distant     | 69 (60-80)       | 635 (24.6)          | 24.2        | III           | 66 (56-75)       | 289 (32.2)          | 32.2        | Distant     | 64 (56-77)       | 202 (21.8)          | 23.4        |
|                           | IV           | 70 (60-80)       | 594 (23.2)          | 22.8        | Missing     | 86 (75-91)       | 77 (2.9)            |             | IV            | 64 (56-77)       | 189 (21.0)          | 21.9        | Missing     | 77 (67-85)       | 25 (2.6)            |             |

**Supplementary Table 16A.** Age-standardised and age-specific one-year net survival (%) by imputed stage at diagnosis for individual registries in Canada for colon cancer patients diagnosed during 2010-2014

| Stage                                |          | Alberta             | British Columbia      | Manitoba             | New Brunswick         | Newfoundland and Labrador | Nova Scotia           | Ontario             | Prince Edward Island  | Saskatchewan          |
|--------------------------------------|----------|---------------------|-----------------------|----------------------|-----------------------|---------------------------|-----------------------|---------------------|-----------------------|-----------------------|
|                                      |          | 1-year NS (95% CI)  | 1-year NS (95% CI)    | 1-year NS (95% CI)   | 1-year NS (95% CI)    | 1-year NS (95% CI)        | 1-year NS (95% CI)    | 1-year NS (95% CI)  | 1-year NS (95% CI)    | 1-year NS (95% CI)    |
| All patients <sup>†</sup>            | All ages | 82.2 (81.0 - 83.3)  | 83.6 (82.7 - 84.4)    | 81.5 (79.5 - 83.2)   | 84.1 (82.0 - 86.0)    | 84.7 (82.5 - 86.6)        | 78.6 (76.6 - 80.5)    | 84.2 (83.6 - 84.7)  | 84.0 (78.9 - 87.9)    | 82.5 (80.6 - 84.2)    |
|                                      | 15-49    | 89.2 (85.6 - 92.0)  | 90.7 (87.7 - 93.0)    | 87.6 (80.9 - 92.1)   | 91.6 (82.0 - 96.2)    | 91.7 (83.1 - 96.0)        | 89.1 (80.5 - 94.0)    | 91.2 (89.6 - 92.7)  | 93.4 (60.1 - 99.1)    | 93.1 (87.0 - 96.4)    |
|                                      | 50-64    | 87.8 (85.9 - 89.5)  | 87.7 (86.1 - 89.2)    | 86.4 (82.8 - 89.2)   | 91.8 (88.1 - 94.3)    | 88.3 (84.6 - 91.2)        | 84.0 (80.3 - 87.1)    | 89.0 (88.0 - 89.9)  | 90.2 (80.7 - 95.2)    | 88.8 (85.6 - 91.3)    |
|                                      | 65-79    | 82.3 (80.3 - 84.1)  | 84.6 (83.2 - 85.9)    | 82.2 (79.1 - 85.0)   | 85.5 (82.3 - 88.2)    | 82.9 (79.5 - 85.7)        | 79.7 (76.7 - 82.4)    | 84.0 (83.0 - 84.9)  | 82.2 (74.8 - 87.6)    | 82.3 (79.1 - 85.1)    |
|                                      | 80-99    | 68.0 (64.7 - 71.1)  | 69.3 (67.0 - 71.5)    | 68.2 (63.3 - 72.6)   | 63.3 (57.3 - 68.6)    | 76.7 (69.3 - 82.6)        | 60.4 (55.3 - 65.1)    | 71.7 (70.2 - 73.2)  | 74.2 (59.7 - 84.2)    | 66.0 (60.9 - 70.5)    |
| <b>TNM Stage<sup>‡</sup></b>         |          |                     |                       |                      |                       |                           |                       |                     |                       |                       |
| Stage I                              | All ages | 95.9 (94.4 - 97.4)  | 97.7 (96.6 - 98.8)    | 95.0 (92.4 - 97.6)   | 97.9 (95.4 - 100.0)   | 97.5 (94.9 - 100.0)       | 89.0 (85.8 - 92.2)    | 96.5 (95.7 - 97.2)  | 90.6 (81.3 - 99.8)    | 92.7 (90.0 - 95.4)    |
|                                      | 15-49    | 98.4 (96.0 - 100.0) | 98.8 (96.2 - 100.0)   | 99.8 (97.2 - 100.0)  | 100.0 (100.0 - 100.0) | 100.0 (100.0 - 100.0)     | 100.0 (100.0 - 100.0) | 98.6 (97.2 - 100.0) | 83.5 (53.8 - 100.0)   | 100.0 (100.0 - 100.0) |
|                                      | 50-64    | 98.6 (97.0 - 100.0) | 98.9 (97.7 - 100.0)   | 99.7 (97.7 - 100.0)  | 99.1 (96.0 - 100.0)   | 99.5 (97.1 - 100.0)       | 95.4 (91.3 - 99.6)    | 98.7 (97.8 - 99.6)  | 100.0 (100.0 - 100.0) | 98.6 (96.3 - 100.0)   |
|                                      | 65-79    | 97.7 (95.6 - 99.7)  | 98.1 (96.6 - 99.6)    | 96.9 (93.3 - 100.0)  | 97.8 (94.0 - 100.0)   | 96.4 (91.8 - 100.0)       | 94.5 (90.7 - 98.2)    | 96.5 (95.3 - 97.7)  | 95.9 (87.5 - 100.0)   | 93.5 (89.5 - 97.5)    |
|                                      | 80-99    | 85.5 (79.1 - 92.0)  | 93.8 (89.6 - 97.9)    | 81.4 (71.5 - 91.3)   | 94.0 (83.7 - 100.0)   | 93.4 (81.9 - 100.0)       | 57.5 (45.6 - 69.5)    | 91.0 (88.2 - 93.8)  | 73.0 (40.5 - 100.0)   | 77.4 (67.6 - 87.2)    |
| Stage II                             | All ages | 95.6 (94.1 - 97.1)  | 94.5 (93.4 - 95.7)    | 94.5 (92.2 - 96.7)   | 96.3 (93.8 - 98.8)    | 95.6 (93.0 - 98.2)        | 90.0 (87.1 - 92.8)    | 94.1 (93.4 - 94.9)  | 96.8 (91.7 - 100.0)   | 92.6 (89.8 - 95.5)    |
|                                      | 15-49    | 98.4 (95.1 - 100.0) | 100.0 (100.0 - 100.0) | 94.2 (86.0 - 100.0)  | 100.0 (100.0 - 100.0) | 100.0 (100.0 - 100.0)     | 95.8 (87.6 - 100.0)   | 98.3 (96.6 - 99.9)  | 100.0 (100.0 - 100.0) | 93.5 (84.6 - 100.0)   |
|                                      | 50-64    | 98.4 (96.7 - 100.0) | 97.2 (95.5 - 98.8)    | 98.8 (96.2 - 100.0)  | 100.0 (99.3 - 100.0)  | 98.0 (94.4 - 100.0)       | 92.2 (87.1 - 97.2)    | 97.4 (96.4 - 98.5)  | 96.1 (87.3 - 100.0)   | 96.6 (92.7 - 100.0)   |
|                                      | 65-79    | 96.4 (94.1 - 98.6)  | 95.5 (93.7 - 97.2)    | 94.3 (90.6 - 98.1)   | 97.8 (94.4 - 100.0)   | 94.3 (90.1 - 98.6)        | 89.6 (85.2 - 93.9)    | 94.8 (93.6 - 96.0)  | 95.2 (87.1 - 100.0)   | 93.1 (88.8 - 97.5)    |
|                                      | 80-99    | 87.2 (81.9 - 92.5)  | 85.4 (81.8 - 89.1)    | 86.8 (80.0 - 93.7)   | 83.0 (72.7 - 93.3)    | 90.6 (80.4 - 100.0)       | 82.0 (74.1 - 89.9)    | 85.1 (82.8 - 87.4)  | 100.0 (89.5 - 100.0)  | 85.4 (77.6 - 93.1)    |
| Stage III                            | All ages | 90.1 (88.2 - 92.0)  | 89.5 (88.1 - 91.0)    | 88.5 (85.5 - 91.5)   | 91.0 (87.8 - 94.2)    | 85.8 (81.7 - 89.9)        | 88.6 (85.7 - 91.5)    | 89.9 (88.9 - 90.9)  | 94.2 (88.4 - 100.0)   | 90.9 (87.8 - 94.0)    |
|                                      | 15-49    | 97.2 (93.9 - 100.0) | 97.4 (94.7 - 100.0)   | 97.8 (93.2 - 100.0)  | 99.3 (94.4 - 100.0)   | 100.0 (100.0 - 100.0)     | 95.0 (85.0 - 100.0)   | 97.6 (95.8 - 99.4)  | 100.0 (100.0 - 100.0) | 100.0 (100.0 - 100.0) |
|                                      | 50-64    | 94.1 (91.6 - 96.6)  | 94.4 (92.4 - 96.5)    | 91.7 (87.1 - 96.2)   | 97.6 (94.1 - 100.0)   | 91.7 (86.4 - 97.1)        | 95.9 (92.2 - 99.6)    | 95.0 (93.8 - 96.3)  | 94.9 (83.9 - 100.0)   | 98.0 (95.0 - 100.0)   |
|                                      | 65-79    | 89.8 (86.7 - 92.9)  | 91.1 (89.0 - 93.2)    | 89.5 (85.0 - 94.0)   | 94.3 (89.8 - 98.9)    | 82.6 (76.3 - 88.9)        | 89.9 (85.4 - 94.4)    | 89.4 (87.8 - 91.0)  | 92.5 (83.4 - 100.0)   | 89.0 (83.6 - 94.4)    |
|                                      | 80-99    | 79.2 (73.0 - 85.4)  | 73.9 (69.4 - 78.5)    | 72.9 (62.6 - 83.1)   | 67.8 (56.4 - 79.1)    | 73.8 (58.4 - 89.2)        | 67.8 (58.5 - 77.2)    | 76.9 (73.9 - 79.8)  | 90.9 (71.9 - 100.0)   | 78.5 (68.1 - 89.0)    |
| Stage IV                             | All ages | 46.6 (43.6 - 49.6)  | 50.1 (47.6 - 52.5)    | 40.1 (34.9 - 45.3)   | 53.0 (47.6 - 58.4)    | 49.2 (43.2 - 55.3)        | 43.1 (38.3 - 47.9)    | 49.4 (47.7 - 51.0)  | 51.9 (40.6 - 63.2)    | 49.7 (44.8 - 54.5)    |
|                                      | 15-49    | 61.9 (52.0 - 71.8)  | 68.6 (60.4 - 76.8)    | 58.6 (42.5 - 74.6)   | 70.2 (49.2 - 91.2)    | 71.0 (52.5 - 89.5)        | 70.7 (53.5 - 87.8)    | 71.0 (65.9 - 76.0)  | 100.0 (100.0 - 100.0) | 78.8 (64.8 - 92.8)    |
|                                      | 50-64    | 61.6 (56.4 - 66.7)  | 61.5 (57.0 - 66.0)    | 52.6 (43.1 - 62.2)   | 69.1 (59.0 - 79.3)    | 58.9 (48.3 - 69.4)        | 53.1 (44.2 - 62.0)    | 61.2 (58.1 - 64.4)  | 63.7 (40.3 - 87.0)    | 57.7 (48.5 - 66.9)    |
|                                      | 65-79    | 42.7 (38.0 - 47.5)  | 47.2 (43.3 - 51.0)    | 35.9 (28.0 - 43.8)   | 52.0 (44.0 - 60.0)    | 45.4 (36.4 - 54.4)        | 35.9 (28.7 - 43.1)    | 45.7 (42.9 - 48.5)  | 44.9 (29.3 - 60.6)    | 45.3 (37.3 - 53.3)    |
|                                      | 80-99    | 19.8 (14.2 - 25.3)  | 22.4 (18.3 - 26.5)    | 21.2 (13.1 - 29.3)   | 16.4 (8.6 - 24.2)     | 25.5 (11.0 - 40.0)        | 23.3 (14.7 - 32.0)    | 22.9 (19.9 - 25.9)  | 22.4 (2.0 - 42.9)     | 25.4 (17.3 - 33.4)    |
| <b>Mapped SEER stage<sup>§</sup></b> |          |                     |                       |                      |                       |                           |                       |                     |                       |                       |
| Localised                            | All ages | 96.3 (95.1 - 97.5)  | 96.6 (95.8 - 97.5)    | 95.8 (94.0 - 97.7)   | 97.5 (95.6 - 99.3)    | 97.4 (95.4 - 99.4)        | 89.9 (87.3 - 92.6)    | 96.3 (95.7 - 96.9)  | 93.2 (86.0 - 100.0)   | 93.9 (92.0 - 95.8)    |
|                                      | 15-49    | 98.6 (96.6 - 100.0) | 99.3 (97.8 - 100.0)   | 100.0 (98.2 - 100.0) | 100.0 (100.0 - 100.0) | 99.8 (97.3 - 100.0)       | 100.0 (100.0 - 100.0) | 98.8 (97.6 - 99.9)  | 83.5 (53.8 - 100.0)   | 96.0 (90.5 - 100.0)   |
|                                      | 50-64    | 98.8 (97.6 - 100.0) | 98.5 (97.5 - 99.6)    | 98.8 (96.8 - 100.0)  | 99.5 (97.4 - 100.0)   | 99.9 (98.4 - 100.0)       | 93.8 (89.7 - 97.9)    | 98.7 (98.0 - 99.4)  | 97.4 (91.3 - 100.0)   | 98.7 (96.9 - 100.0)   |
|                                      | 65-79    | 97.6 (96.0 - 99.3)  | 97.0 (95.8 - 98.3)    | 97.6 (95.0 - 100.0)  | 98.7 (96.3 - 100.0)   | 95.4 (92.0 - 98.7)        | 93.8 (90.4 - 97.2)    | 96.4 (95.5 - 97.3)  | 98.7 (93.9 - 100.0)   | 94.8 (91.9 - 97.7)    |
|                                      | 80-99    | 87.8 (82.9 - 92.7)  | 90.5 (87.0 - 94.0)    | 85.3 (78.6 - 91.9)   | 89.0 (81.6 - 96.5)    | 95.4 (87.6 - 100.0)       | 69.6 (60.8 - 78.5)    | 90.6 (88.5 - 92.8)  | 85.8 (66.6 - 100.0)   | 82.5 (75.7 - 89.4)    |
| Regional                             | All ages | 91.7 (90.3 - 93.2)  | 90.7 (89.6 - 91.8)    | 89.7 (87.4 - 92.0)   | 90.0 (86.8 - 93.2)    | 87.0 (83.5 - 90.4)        | 89.7 (87.5 - 91.9)    | 90.8 (90.0 - 91.5)  | 93.2 (87.6 - 98.7)    | 91.0 (88.4 - 93.7)    |
|                                      | 15-49    | 97.4 (94.7 - 100.0) | 97.9 (95.7 - 100.0)   | 94.6 (88.5 - 100.0)  | 96.6 (89.6 - 100.0)   | 99.6 (94.8 - 100.0)       | 94.7 (87.4 - 100.0)   | 97.3 (95.9 - 98.8)  | 100.0 (100.0 - 100.0) | 100.0 (100.0 - 100.0) |
|                                      | 50-64    | 95.3 (93.3 - 97.3)  | 94.8 (93.1 - 96.4)    | 93.9 (90.5 - 97.3)   | 97.8 (94.7 - 100.0)   | 92.4 (87.7 - 97.1)        | 97.1 (94.5 - 99.7)    | 95.5 (94.4 - 96.5)  | 96.9 (89.6 - 100.0)   | 97.7 (94.8 - 100.0)   |
|                                      | 65-79    | 91.7 (89.4 - 94.1)  | 92.3 (90.6 - 94.0)    | 89.8 (86.2 - 93.4)   | 92.9 (88.4 - 97.4)    | 84.2 (78.9 - 89.5)        | 89.2 (85.8 - 92.7)    | 90.9 (89.7 - 92.2)  | 89.5 (80.6 - 98.5)    | 88.6 (83.8 - 93.3)    |
|                                      | 80-99    | 81.4 (76.4 - 86.5)  | 77.0 (73.6 - 80.4)    | 78.0 (70.8 - 85.2)   | 67.6 (56.9 - 78.3)    | 74.9 (61.9 - 87.8)        | 73.0 (65.9 - 80.2)    | 78.2 (76.0 - 80.5)  | 93.7 (78.5 - 100.0)   | 80.7 (72.7 - 88.6)    |
| Distant                              | All ages | 48.5 (45.6 - 51.5)  | 50.6 (48.1 - 53.0)    | 42.3 (37.1 - 47.4)   | 54.7 (49.5 - 59.9)    | 50.1 (44.1 - 56.1)        | 44.5 (39.7 - 49.2)    | 51.0 (49.4 - 52.7)  | 54.8 (43.9 - 65.7)    | 50.7 (46.1 - 55.4)    |
|                                      | 15-49    | 62.7 (52.9 - 72.4)  | 68.6 (60.4 - 76.8)    | 59.7 (43.9 - 75.6)   | 75.0 (55.8 - 94.3)    | 68.3 (48.1 - 88.5)        | 71.0 (54.1 - 88.0)    | 72.4 (67.6 - 77.2)  | 100.0 (100.0 - 100.0) | 80.6 (67.5 - 93.6)    |
|                                      | 50-64    | 62.9 (57.9 - 67.9)  | 61.6 (57.1 - 66.0)    | 54.6 (45.3 - 64.0)   | 70.2 (60.0 - 80.4)    | 59.3 (49.0 - 69.6)        | 53.6 (45.2 - 62.1)    | 62.7 (59.7 - 65.7)  | 67.9 (46.4 - 89.3)    | 59.2 (50.4 - 68.0)    |
|                                      | 65-79    | 45.4 (40.8 - 50.0)  | 47.9 (44.1 - 51.8)    | 37.4 (29.6 - 45.3)   | 52.7 (44.6 - 60.8)    | 47.8 (38.9 - 56.6)        | 38.5 (31.4 - 45.7)    | 47.2 (44.5 - 49.9)  | 46.3 (30.8 - 61.8)    | 47.0 (39.2 - 54.8)    |
|                                      | 80-99    | 22.2 (16.9 - 27.5)  | 23.4 (19.3 - 27.6)    | 24.6 (16.3 - 33.0)   | 18.3 (10.2 - 26.4)    | 24.2 (10.1 - 38.4)        | 24.4 (15.7 - 33.1)    | 25.4 (22.4 - 28.5)  | 28.0 (6.0 - 50.1)     | 24.9 (17.1 - 32.7)    |

Abbreviation: NS = net survival, CI = confidence interval

All ages=Age-standardised

<sup>†</sup> Modell: Age spline with mapped SEER stage as time-dependent covariate

<sup>‡</sup> Modell2: Age spline allowing separate models for each stage category

**Supplementary Table 16B.** Age-standardised and age-specific five-year net survival (%) by imputed stage at diagnosis for individual registries in Canada for colon cancer patients diagnosed during 2010-2014

| Stage                                |          | Alberta             | British Columbia    | Manitoba            | New Brunswick         | Newfoundland and Labrador | Nova Scotia           | Ontario             | Prince Edward Island | Saskatchewan          |
|--------------------------------------|----------|---------------------|---------------------|---------------------|-----------------------|---------------------------|-----------------------|---------------------|----------------------|-----------------------|
|                                      |          | 5-year NS (95% CI)    | 5-year NS (95% CI)        | 5-year NS (95% CI)    | 5-year NS (95% CI)  | 5-year NS (95% CI)   | 5-year NS (95% CI)    |
| All patients <sup>†</sup>            | All ages | 65.1 (63.5 - 66.7)  | 65.9 (64.6 - 67.2)  | 64.2 (61.6 - 66.7)  | 68.3 (65.2 - 71.2)    | 73.4 (70.2 - 76.4)        | 62.2 (59.6 - 64.7)    | 68.3 (67.4 - 69.1)  | 62.0 (54.7 - 68.6)   | 64.7 (61.9 - 67.3)    |
|                                      | 15-49    | 72.7 (67.9 - 77.0)  | 67.2 (62.8 - 71.2)  | 69.8 (61.5 - 76.7)  | 74.1 (63.0 - 82.3)    | 72.3 (60.6 - 81.1)        | 62.5 (52.5 - 70.9)    | 72.7 (70.1 - 75.1)  | 49.8 (24.3 - 70.9)   | 69.6 (60.3 - 77.1)    |
|                                      | 50-64    | 68.7 (66.0 - 71.1)  | 68.1 (65.9 - 70.3)  | 68.3 (64.0 - 72.3)  | 70.1 (65.0 - 74.6)    | 72.8 (67.8 - 77.1)        | 66.3 (61.9 - 70.3)    | 71.3 (69.9 - 72.7)  | 75.2 (62.3 - 84.2)   | 71.5 (67.1 - 75.4)    |
|                                      | 65-79    | 66.3 (63.7 - 68.8)  | 68.1 (66.1 - 70.0)  | 64.3 (60.3 - 67.9)  | 71.0 (66.4 - 75.0)    | 72.8 (68.2 - 76.9)        | 64.6 (60.7 - 68.2)    | 67.7 (66.4 - 69.0)  | 60.2 (50.6 - 68.6)   | 65.1 (60.9 - 69.0)    |
|                                      | 80-99    | 51.6 (46.7 - 56.2)  | 56.1 (52.6 - 59.5)  | 53.5 (46.7 - 59.9)  | 57.8 (49.1 - 65.5)    | 76.7 (62.7 - 86.0)        | 48.3 (41.6 - 54.7)    | 61.6 (59.1 - 64.0)  | 53.2 (31.5 - 70.8)   | 49.5 (42.3 - 56.3)    |
| <b>TNM Stage<sup>‡</sup></b>         |          |                     |                     |                     |                       |                           |                       |                     |                      |                       |
| Stage I                              | All ages | 91.3 (88.2 - 94.3)  | 96.7 (93.9 - 99.5)  | 88.7 (83.7 - 93.6)  | 99.6 (94.8 - 100.0)   | 92.3 (84.7 - 100.0)       | 87.0 (82.2 - 91.7)    | 95.1 (93.5 - 96.7)  | 77.6 (62.0 - 93.2)   | 86.5 (81.4 - 91.5)    |
|                                      | 15-49    | 98.3 (95.4 - 100.0) | 93.8 (87.8 - 99.9)  | 94.6 (82.9 - 100.0) | 94.1 (80.9 - 100.0)   | 100.0 (100.0 - 100.0)     | 100.0 (100.0 - 100.0) | 94.8 (91.6 - 98.0)  | 84.0 (54.1 - 100.0)  | 100.0 (100.0 - 100.0) |
|                                      | 50-64    | 94.6 (91.3 - 97.9)  | 95.8 (92.8 - 98.9)  | 96.6 (91.5 - 100.0) | 97.0 (91.0 - 100.0)   | 94.7 (86.3 - 100.0)       | 92.6 (86.7 - 98.5)    | 95.9 (94.1 - 97.7)  | 91.2 (74.4 - 100.0)  | 95.0 (89.7 - 100.0)   |
|                                      | 65-79    | 94.6 (90.1 - 99.1)  | 98.2 (94.6 - 100.0) | 95.8 (89.2 - 100.0) | 98.4 (91.1 - 100.0)   | 90.3 (79.4 - 100.0)       | 92.7 (86.2 - 99.3)    | 93.8 (91.5 - 96.1)  | 86.8 (69.6 - 100.0)  | 91.9 (85.3 - 98.5)    |
|                                      | 80-99    | 74.2 (62.2 - 86.2)  | 96.2 (84.7 - 100.0) | 60.9 (46.4 - 75.5)  | 100.0 (90.1 - 100.0)  | 88.0 (56.9 - 100.0)       | 53.8 (39.0 - 68.7)    | 98.0 (91.6 - 100.0) | 40.0 (0.0 - 85.1)    | 59.5 (44.5 - 74.5)    |
| Stage II                             | All ages | 88.5 (85.8 - 91.3)  | 87.4 (84.9 - 89.8)  | 85.4 (81.2 - 89.5)  | 91.1 (86.3 - 95.9)    | 92.6 (87.0 - 98.2)        | 83.5 (79.2 - 87.7)    | 88.4 (86.9 - 90.0)  | 82.6 (69.9 - 95.4)   | 82.3 (77.2 - 87.3)    |
|                                      | 15-49    | 94.0 (87.7 - 100.0) | 94.7 (89.7 - 99.6)  | 83.9 (71.4 - 96.4)  | 100.0 (100.0 - 100.0) | 100.0 (100.0 - 100.0)     | 82.4 (67.6 - 97.1)    | 94.0 (90.6 - 97.4)  | 67.4 (14.5 - 100.0)  | 83.8 (67.7 - 99.9)    |
|                                      | 50-64    | 90.2 (86.4 - 93.9)  | 88.5 (84.8 - 92.2)  | 92.5 (87.0 - 97.9)  | 92.5 (86.1 - 98.8)    | 93.0 (85.9 - 100.0)       | 84.3 (77.6 - 91.1)    | 90.8 (88.5 - 93.2)  | 83.6 (65.3 - 100.0)  | 87.9 (81.0 - 94.8)    |
|                                      | 65-79    | 88.2 (84.1 - 92.4)  | 86.8 (83.3 - 90.2)  | 81.4 (74.8 - 87.9)  | 91.2 (84.2 - 98.2)    | 92.7 (84.6 - 100.0)       | 81.8 (75.6 - 88.1)    | 86.7 (84.3 - 89.2)  | 83.6 (68.5 - 98.6)   | 81.1 (74.0 - 88.1)    |
|                                      | 80-99    | 82.9 (73.2 - 92.6)  | 82.6 (75.3 - 89.8)  | 81.0 (68.0 - 94.0)  | 83.8 (66.8 - 100.0)   | 85.9 (60.0 - 100.0)       | 84.4 (70.7 - 98.2)    | 85.3 (80.5 - 90.0)  | 92.8 (48.7 - 100.0)  | 73.9 (58.6 - 89.3)    |
| Stage III                            | All ages | 70.1 (67.0 - 73.2)  | 70.0 (67.4 - 72.7)  | 66.9 (62.1 - 71.6)  | 77.3 (71.9 - 82.7)    | 62.0 (54.9 - 69.1)        | 64.9 (60.1 - 69.6)    | 70.6 (68.5 - 72.7)  | 76.7 (65.0 - 88.3)   | 71.7 (66.4 - 77.1)    |
|                                      | 15-49    | 87.7 (81.2 - 94.2)  | 75.6 (68.4 - 82.8)  | 81.7 (70.4 - 93.1)  | 97.0 (89.4 - 100.0)   | 78.6 (58.9 - 98.2)        | 70.0 (53.0 - 87.0)    | 81.1 (76.6 - 85.7)  | 86.6 (60.5 - 100.0)  | 88.4 (76.3 - 100.0)   |
|                                      | 50-64    | 78.3 (73.8 - 82.7)  | 78.3 (74.4 - 82.1)  | 70.4 (63.1 - 77.7)  | 78.1 (69.8 - 86.4)    | 67.1 (57.6 - 76.5)        | 79.7 (72.4 - 86.9)    | 77.4 (74.4 - 80.3)  | 87.1 (70.1 - 100.0)  | 86.3 (79.6 - 93.0)    |
|                                      | 65-79    | 69.9 (65.1 - 74.7)  | 71.3 (67.7 - 74.8)  | 64.4 (57.3 - 71.6)  | 78.9 (70.4 - 87.4)    | 60.4 (51.6 - 69.2)        | 62.1 (54.8 - 69.3)    | 69.2 (66.5 - 72.0)  | 67.8 (46.7 - 88.9)   | 62.5 (54.2 - 70.7)    |
|                                      | 80-99    | 45.3 (36.0 - 54.7)  | 50.5 (42.9 - 58.1)  | 53.2 (39.2 - 67.1)  | 57.9 (40.6 - 75.2)    | 53.0 (28.5 - 77.5)        | 39.5 (27.7 - 51.3)    | 55.3 (49.9 - 60.7)  | 66.4 (26.1 - 100.0)  | 59.9 (42.9 - 76.8)    |
| Stage IV                             | All ages | 12.8 (10.7 - 14.8)  | 11.9 (10.0 - 13.8)  | 11.8 (8.7 - 14.8)   | 12.5 (8.5 - 16.6)     | 9.4 (5.2 - 13.6)          | 11.0 (7.9 - 14.0)     | 11.1 (9.6 - 12.5)   | 6.3 (0.0 - 13.9)     | 12.3 (9.0 - 15.6)     |
|                                      | 15-49    | 22.6 (14.9 - 30.3)  | 19.4 (12.4 - 26.3)  | 26.2 (12.5 - 39.8)  | 19.5 (4.0 - 34.9)     | 12.1 (0.0 - 29.2)         | 16.8 (4.6 - 29.0)     | 21.4 (15.9 - 26.8)  | 0.4 (0.0 - 2.9)      | 14.9 (3.6 - 26.3)     |
|                                      | 50-64    | 17.9 (13.9 - 21.9)  | 15.5 (11.7 - 19.3)  | 15.6 (9.4 - 21.8)   | 18.4 (10.6 - 26.1)    | 14.3 (6.4 - 22.1)         | 12.0 (6.8 - 17.3)     | 16.7 (13.8 - 19.6)  | *                    | 16.7 (10.6 - 22.9)    |
|                                      | 65-79    | 10.2 (7.1 - 13.3)   | 10.8 (7.8 - 13.8)   | 8.3 (4.5 - 12.0)    | 13.4 (7.2 - 19.6)     | 7.5 (2.0 - 13.0)          | 10.8 (5.6 - 16.0)     | 8.6 (6.7 - 10.5)    | 4.4 (0.0 - 10.5)     | 11.0 (5.6 - 16.5)     |
|                                      | 80-99    | 1.5 (0.0 - 3.6)     | 2.3 (0.6 - 4.0)     | *                   | 1.3 (0.0 - 3.5)       | 1.6 (0.0 - 7.2)           | 1.3 (0.0 - 4.1)       | 2.5 (1.1 - 3.8)     | *                    | 1.9 (0.0 - 5.6)       |
| <b>Mapped SEER stage<sup>‡</sup></b> |          |                     |                     |                     |                       |                           |                       |                     |                      |                       |
| Localised                            | All ages | 91.7 (89.3 - 94.1)  | 93.9 (91.9 - 95.9)  | 89.7 (86.0 - 93.4)  | 96.2 (92.7 - 99.7)    | 94.3 (89.2 - 99.5)        | 88.1 (84.1 - 92.2)    | 94.8 (93.4 - 96.1)  | 80.8 (69.7 - 92.0)   | 86.4 (82.5 - 90.2)    |
|                                      | 15-49    | 95.1 (91.0 - 99.3)  | 93.6 (89.2 - 98.1)  | 93.1 (84.6 - 100.0) | 96.9 (89.1 - 100.0)   | 100.0 (98.1 - 100.0)      | 100.0 (100.0 - 100.0) | 95.1 (92.5 - 97.7)  | 59.9 (14.7 - 100.0)  | 96.9 (91.2 - 100.0)   |
|                                      | 50-64    | 94.1 (91.4 - 96.8)  | 94.0 (91.2 - 96.8)  | 95.4 (91.1 - 99.6)  | 95.1 (90.2 - 100.0)   | 96.0 (90.8 - 100.0)       | 90.8 (85.2 - 96.4)    | 95.4 (93.8 - 96.9)  | 84.7 (70.8 - 98.7)   | 93.8 (89.5 - 98.2)    |
|                                      | 65-79    | 93.3 (89.8 - 96.7)  | 93.6 (90.8 - 96.5)  | 91.2 (85.8 - 96.6)  | 96.2 (90.8 - 100.0)   | 92.8 (85.8 - 99.8)        | 91.7 (85.8 - 97.6)    | 92.8 (90.8 - 94.7)  | 87.8 (75.5 - 100.0)  | 88.5 (83.3 - 93.7)    |
|                                      | 80-99    | 82.1 (73.0 - 91.2)  | 93.6 (86.3 - 100.0) | 75.9 (64.0 - 87.7)  | 97.4 (83.4 - 100.0)   | 92.3 (70.3 - 100.0)       | 67.2 (53.7 - 80.7)    | 99.4 (94.3 - 100.0) | 67.8 (32.5 - 100.0)  | 67.2 (55.4 - 79.0)    |
| Regional                             | All ages | 75.8 (73.3 - 78.3)  | 74.2 (72.2 - 76.3)  | 71.9 (68.2 - 75.7)  | 77.6 (72.7 - 82.4)    | 67.0 (60.9 - 73.1)        | 74.6 (71.2 - 78.0)    | 74.9 (73.4 - 76.4)  | 78.5 (68.6 - 88.5)   | 74.2 (69.7 - 78.7)    |
|                                      | 15-49    | 90.7 (85.8 - 95.6)  | 79.7 (73.9 - 85.6)  | 79.7 (69.4 - 90.0)  | 97.4 (90.4 - 100.0)   | 83.4 (67.4 - 99.3)        | 76.6 (65.0 - 88.3)    | 84.4 (80.8 - 88.0)  | 88.3 (65.3 - 100.0)  | 89.5 (79.7 - 99.3)    |
|                                      | 50-64    | 81.5 (77.9 - 85.1)  | 80.1 (76.8 - 83.3)  | 76.7 (70.9 - 82.5)  | 81.0 (73.9 - 88.1)    | 72.7 (64.4 - 81.0)        | 85.2 (80.2 - 90.2)    | 80.4 (78.2 - 82.7)  | 90.7 (76.9 - 100.0)  | 85.7 (79.6 - 91.7)    |
|                                      | 65-79    | 75.1 (71.2 - 79.0)  | 75.4 (72.5 - 78.3)  | 70.3 (64.7 - 75.9)  | 78.2 (70.9 - 85.5)    | 63.8 (55.7 - 71.8)        | 71.1 (65.9 - 76.2)    | 73.9 (71.7 - 76.2)  | 69.0 (52.7 - 85.3)   | 67.2 (60.3 - 74.0)    |
|                                      | 80-99    | 57.3 (49.3 - 65.4)  | 59.4 (53.5 - 65.3)  | 60.6 (49.6 - 71.7)  | 57.0 (42.1 - 71.8)    | 56.9 (35.2 - 78.6)        | 60.0 (49.9 - 70.1)    | 61.4 (57.1 - 65.8)  | 72.0 (36.4 - 100.0)  | 64.3 (50.3 - 78.4)    |
| Distant                              | All ages | 15.6 (13.5 - 17.8)  | 12.1 (10.3 - 13.8)  | 14.0 (10.7 - 17.2)  | 13.2 (9.0 - 17.4)     | 10.4 (6.0 - 14.8)         | 12.8 (9.7 - 15.9)     | 13.5 (12.3 - 14.8)  | 7.9 (0.0 - 17.2)     | 14.9 (11.4 - 18.4)    |
|                                      | 15-49    | 24.2 (16.4 - 32.0)  | 19.5 (12.3 - 26.7)  | 29.8 (16.0 - 43.6)  | 20.1 (4.7 - 35.5)     | 8.0 (0.0 - 20.9)          | 18.7 (6.6 - 30.7)     | 25.4 (20.1 - 30.7)  | 0.4 (0.0 - 2.9)      | 16.4 (4.6 - 28.1)     |
|                                      | 50-64    | 20.5 (16.4 - 24.5)  | 15.3 (11.9 - 18.8)  | 18.6 (12.2 - 25.0)  | 19.4 (11.5 - 27.3)    | 13.9 (6.5 - 21.4)         | 13.0 (7.8 - 18.2)     | 19.8 (17.0 - 22.5)  | *                    | 21.4 (14.8 - 28.0)    |
|                                      | 65-79    | 14.5 (11.1 - 17.9)  | 11.8 (8.8 - 14.9)   | 9.3 (5.4 - 13.3)    | 13.5 (7.2 - 19.8)     | 11.0 (4.3 - 17.6)         | 14.3 (9.0 - 19.6)     | 10.8 (8.9 - 12.7)   | 5.1 (0.0 - 12.0)     | 12.6 (6.8 - 18.5)     |
|                                      | 80-99    | 4.0 (1.0 - 6.9)     | 2.2 (0.7 - 3.6)     | 4.5 (0.0 - 9.2)     | 2.0 (0.0 - 5.0)       | 3.4 (0.0 - 12.7)          | 2.0 (0.0 - 5.0)       | 3.1 (1.7 - 4.5)     | *                    | 2.8 (0.0 - 7.1)       |

Abbreviation: NS = net survival, CI = confidence interval

All ages=Age-standardised

<sup>†</sup> Model1: Age spline with mapped SEER stage as time-dependent covariate

<sup>‡</sup> Model2: Age spline allowing separate models for each stage category

\*Not possible to estimate



**Supplementary Table 17A.** Age-standardised and age-specific one-year net survival (%) by imputed stage at diagnosis for individual registries in Canada for rectal cancer patients diagnosed during 2010-2014

| Stage                                |          | Alberta               | British Columbia      | Manitoba              | New Brunswick         | Newfoundland and Labrador | Nova Scotia           | Ontario              | Prince Edward Island  | Saskatchewan          |
|--------------------------------------|----------|-----------------------|-----------------------|-----------------------|-----------------------|---------------------------|-----------------------|----------------------|-----------------------|-----------------------|
|                                      |          | 1-year NS (95% CI)        | 1-year NS (95% CI)    | 1-year NS (95% CI)   | 1-year NS (95% CI)    | 1-year NS (95% CI)    |
| All patients <sup>‡</sup>            | All ages | 86.3 (84.4 - 88.0)    | 87.7 (86.2 - 89.0)    | 84.5 (81.4 - 87.1)    | 85.3 (81.3 - 88.5)    | 86.3 (81.9 - 89.7)        | 81.6 (78.1 - 84.7)    | 87.0 (86.0 - 88.0)   | 90.3 (79.6 - 95.6)    | 84.7 (81.4 - 87.5)    |
|                                      | 15-49    | 94.0 (89.5 - 96.6)    | 93.9 (90.1 - 96.2)    | 92.8 (84.4 - 96.8)    | 97.9 (83.6 - 99.7)    | 91.4 (75.2 - 97.2)        | 86.4 (74.5 - 93.0)    | 96.2 (94.3 - 97.5)   | 90.2 (46.8 - 98.6)    | 92.3 (80.4 - 97.1)    |
|                                      | 50-64    | 91.0 (88.5 - 92.9)    | 91.6 (89.5 - 93.3)    | 88.5 (83.8 - 91.9)    | 91.5 (85.6 - 95.1)    | 94.7 (89.3 - 97.5)        | 89.3 (84.5 - 92.7)    | 91.6 (90.3 - 92.8)   | 89.3 (68.6 - 96.6)    | 92.4 (87.9 - 95.3)    |
|                                      | 65-79    | 86.9 (83.7 - 89.5)    | 88.6 (86.4 - 90.5)    | 83.9 (78.7 - 87.9)    | 83.3 (77.2 - 87.9)    | 86.5 (79.7 - 91.1)        | 82.4 (77.4 - 86.5)    | 87.4 (85.7 - 88.8)   | 96.9 (73.3 - 99.7)    | 85.2 (79.8 - 89.2)    |
|                                      | 80-99    | 71.8 (65.0 - 77.5)    | 74.8 (70.0 - 78.9)    | 74.7 (64.6 - 82.3)    | 70.5 (55.5 - 81.2)    | 64.0 (46.9 - 76.8)        | 66.8 (55.2 - 76.0)    | 73.4 (70.0 - 76.4)   | 81.0 (36.3 - 95.7)    | 65.0 (54.3 - 73.9)    |
| <b>TNM Stage<sup>§</sup></b>         |          |                       |                       |                       |                       |                           |                       |                      |                       |                       |
| Stage I                              | All ages | 98.9 (96.8 - 100.0)   | 97.2 (95.2 - 99.3)    | 95.3 (91.3 - 99.4)    | 91.9 (86.9 - 96.9)    | 96.3 (91.9 - 100.0)       | 90.6 (85.5 - 95.8)    | 96.2 (94.9 - 97.6)   | 91.7 (82.4 - 100.0)   | 92.7 (88.1 - 97.3)    |
|                                      | 15-49    | 100.0 (100.0 - 100.0) | 100.0 (100.0 - 100.0) | 99.7 (95.5 - 100.0)   | 100.0 (100.0 - 100.0) | 100.0 (100.0 - 100.0)     | 100.0 (100.0 - 100.0) | 100.0 (99.5 - 100.0) | 100.0 (100.0 - 100.0) | 100.0 (100.0 - 100.0) |
|                                      | 50-64    | 98.7 (96.7 - 100.0)   | 97.6 (94.7 - 100.0)   | 100.0 (100.0 - 100.0) | 93.2 (86.1 - 100.0)   | 100.0 (100.0 - 100.0)     | 100.0 (100.0 - 100.0) | 98.6 (97.4 - 99.8)   | 93.6 (80.6 - 100.0)   | 98.8 (95.1 - 100.0)   |
|                                      | 65-79    | 98.1 (94.9 - 100.0)   | 97.9 (95.0 - 100.0)   | 95.2 (88.9 - 100.0)   | 93.6 (87.3 - 100.0)   | 94.2 (86.0 - 100.0)       | 90.2 (82.8 - 97.7)    | 96.8 (95.0 - 98.6)   | 93.0 (80.4 - 100.0)   | 96.7 (90.8 - 100.0)   |
|                                      | 80-99    | 100.0 (91.9 - 100.0)  | 92.5 (83.2 - 100.0)   | 83.7 (67.7 - 99.6)    | 80.3 (61.3 - 99.4)    | 88.9 (68.3 - 100.0)       | 73.0 (55.3 - 90.7)    | 88.2 (82.0 - 94.3)   | 80.0 (38.1 - 100.0)   | 69.5 (51.2 - 87.8)    |
| Stage II                             | All ages | 93.1 (89.7 - 96.4)    | 95.8 (93.7 - 97.8)    | 92.8 (86.9 - 98.7)    | 96.1 (92.4 - 99.8)    | 90.8 (85.2 - 96.3)        | 91.3 (85.0 - 97.5)    | 91.4 (89.3 - 93.5)   | 95.7 (86.8 - 100.0)   | 92.2 (87.2 - 97.2)    |
|                                      | 15-49    | 92.1 (81.2 - 100.0)   | 100.0 (100.0 - 100.0) | 97.4 (75.7 - 100.0)   | 100.0 (100.0 - 100.0) | 100.0 (100.0 - 100.0)     | 100.0 (100.0 - 100.0) | 100.0 (99.0 - 100.0) | 100.0 (100.0 - 100.0) | 100.0 (100.0 - 100.0) |
|                                      | 50-64    | 97.8 (94.8 - 100.0)   | 96.5 (93.8 - 99.3)    | 96.8 (89.3 - 100.0)   | 96.0 (90.6 - 100.0)   | 100.0 (100.0 - 100.0)     | 90.9 (81.6 - 100.0)   | 94.3 (91.5 - 97.1)   | 100.0 (100.0 - 100.0) | 97.8 (92.3 - 100.0)   |
|                                      | 65-79    | 95.2 (90.3 - 100.0)   | 97.5 (94.7 - 100.0)   | 93.5 (84.1 - 100.0)   | 96.8 (91.6 - 100.0)   | 87.4 (78.7 - 96.1)        | 92.1 (83.8 - 100.0)   | 90.2 (86.5 - 93.9)   | 100.0 (100.0 - 100.0) | 92.8 (85.4 - 100.0)   |
|                                      | 80-99    | 78.4 (65.5 - 91.3)    | 88.1 (79.9 - 96.2)    | 84.1 (66.9 - 100.0)   | 90.9 (75.1 - 100.0)   | 66.7 (36.2 - 97.1)        | 85.5 (63.3 - 100.0)   | 83.4 (76.3 - 90.5)   | 71.0 (29.5 - 100.0)   | 73.7 (53.1 - 94.3)    |
| Stage III                            | All ages | 93.3 (90.8 - 95.9)    | 93.9 (91.8 - 96.0)    | 92.1 (88.1 - 96.0)    | 89.5 (83.8 - 95.3)    | 92.8 (87.8 - 97.8)        | 92.6 (88.3 - 96.9)    | 92.1 (90.5 - 93.7)   | 91.6 (79.5 - 100.0)   | 92.7 (88.0 - 97.4)    |
|                                      | 15-49    | 98.6 (95.4 - 100.0)   | 100.0 (100.0 - 100.0) | 97.4 (92.0 - 100.0)   | 99.7 (96.0 - 100.0)   | 100.0 (100.0 - 100.0)     | 100.0 (100.0 - 100.0) | 97.4 (95.5 - 99.4)   | 100.0 (100.0 - 100.0) | 100.0 (100.0 - 100.0) |
|                                      | 50-64    | 95.2 (92.5 - 97.8)    | 97.6 (95.9 - 99.4)    | 97.8 (94.7 - 100.0)   | 97.3 (93.7 - 100.0)   | 96.4 (92.2 - 100.0)       | 98.8 (96.2 - 100.0)   | 95.6 (93.9 - 97.3)   | 98.2 (87.6 - 100.0)   | 97.9 (94.2 - 100.0)   |
|                                      | 65-79    | 94.2 (90.7 - 97.8)    | 95.6 (92.9 - 98.2)    | 91.8 (86.0 - 97.5)    | 92.1 (84.9 - 99.2)    | 93.3 (86.2 - 100.0)       | 90.0 (83.5 - 96.5)    | 92.4 (90.0 - 94.8)   | 89.4 (73.2 - 100.0)   | 92.1 (85.5 - 98.8)    |
|                                      | 80-99    | 83.7 (72.5 - 94.9)    | 79.7 (71.3 - 88.1)    | 79.2 (62.9 - 95.4)    | 52.2 (23.3 - 81.2)    | 71.7 (43.3 - 100.0)       | 87.3 (68.9 - 100.0)   | 82.8 (76.9 - 88.6)   | 77.5 (30.6 - 100.0)   | 80.9 (62.2 - 99.7)    |
| Stage IV                             | All ages | 53.8 (48.1 - 59.5)    | 57.6 (53.3 - 62.0)    | 52.9 (44.7 - 61.1)    | 56.5 (48.3 - 64.6)    | 54.3 (44.9 - 63.7)        | 44.5 (35.9 - 53.2)    | 58.6 (55.2 - 62.0)   | 54.7 (34.3 - 75.1)    | 53.6 (44.3 - 62.9)    |
|                                      | 15-49    | 79.3 (66.6 - 92.1)    | 75.0 (64.1 - 85.8)    | 75.5 (55.7 - 95.3)    | 86.3 (67.2 - 100.0)   | 57.4 (31.5 - 83.2)        | 59.9 (38.5 - 81.4)    | 83.6 (76.1 - 91.1)   | 82.2 (50.0 - 100.0)   | 74.2 (52.2 - 96.3)    |
|                                      | 50-64    | 66.5 (58.3 - 74.8)    | 68.3 (61.3 - 75.4)    | 57.7 (45.6 - 69.7)    | 59.8 (45.7 - 73.9)    | 78.1 (65.7 - 90.5)        | 54.0 (39.4 - 68.6)    | 69.5 (64.5 - 74.6)   | 47.7 (7.9 - 87.5)     | 75.7 (64.6 - 86.8)    |
|                                      | 65-79    | 46.3 (36.5 - 56.1)    | 54.7 (47.7 - 61.8)    | 50.6 (38.0 - 63.2)    | 55.9 (43.8 - 68.1)    | 57.5 (43.2 - 71.8)        | 47.7 (34.6 - 60.7)    | 57.1 (51.5 - 62.7)   | 52.3 (17.0 - 87.6)    | 40.5 (25.0 - 56.0)    |
|                                      | 80-99    | 32.7 (20.9 - 44.5)    | 35.6 (24.7 - 46.5)    | 33.9 (10.7 - 57.0)    | 37.1 (17.5 - 56.7)    | 7.8 (0.0 - 20.4)          | 17.3 (0.8 - 33.9)     | 31.2 (24.3 - 38.0)   | 39.4 (0.0 - 84.6)     | 31.2 (11.3 - 51.1)    |
| <b>Mapped SEER stage<sup>¶</sup></b> |          |                       |                       |                       |                       |                           |                       |                      |                       |                       |
| Localised                            | All ages | 98.0 (96.1 - 99.9)    | 97.4 (95.9 - 98.9)    | 95.7 (92.4 - 99.1)    | 93.6 (89.5 - 97.7)    | 98.1 (94.5 - 100.0)       | 91.2 (86.5 - 95.8)    | 95.5 (94.3 - 96.7)   | 93.2 (86.4 - 100.0)   | 93.0 (88.4 - 97.7)    |
|                                      | 15-49    | 98.8 (96.1 - 100.0)   | 100.0 (100.0 - 100.0) | 100.0 (100.0 - 100.0) | 100.0 (100.0 - 100.0) | 100.0 (100.0 - 100.0)     | 100.0 (100.0 - 100.0) | 100.0 (99.6 - 100.0) | 100.0 (100.0 - 100.0) | 100.0 (100.0 - 100.0) |
|                                      | 50-64    | 99.2 (97.7 - 100.0)   | 98.5 (96.9 - 100.0)   | 100.0 (100.0 - 100.0) | 98.9 (95.5 - 100.0)   | 100.0 (100.0 - 100.0)     | 99.2 (96.2 - 100.0)   | 97.8 (96.5 - 99.0)   | 92.9 (82.6 - 100.0)   | 98.7 (94.7 - 100.0)   |
|                                      | 65-79    | 98.7 (96.1 - 100.0)   | 97.7 (95.5 - 99.8)    | 95.4 (89.9 - 100.0)   | 89.2 (82.1 - 96.3)    | 96.7 (90.2 - 100.0)       | 91.6 (85.2 - 97.9)    | 95.7 (94.0 - 97.4)   | 95.9 (87.4 - 100.0)   | 95.3 (88.8 - 100.0)   |
|                                      | 80-99    | 93.5 (84.5 - 100.0)   | 92.7 (86.5 - 98.9)    | 85.3 (71.8 - 98.8)    | 89.9 (75.2 - 100.0)   | 95.2 (77.4 - 100.0)       | 75.3 (59.3 - 91.3)    | 88.1 (83.1 - 93.1)   | 78.6 (44.5 - 100.0)   | 72.4 (53.3 - 91.5)    |
| Regional                             | All ages | 92.4 (90.2 - 94.6)    | 93.0 (91.2 - 94.8)    | 91.6 (87.9 - 95.2)    | 90.5 (84.6 - 96.4)    | 91.2 (85.0 - 97.3)        | 91.6 (87.8 - 95.3)    | 91.8 (90.4 - 93.2)   | 91.6 (82.4 - 100.0)   | 91.3 (86.6 - 96.0)    |
|                                      | 15-49    | 97.6 (94.1 - 100.0)   | 100.0 (100.0 - 100.0) | 95.4 (88.9 - 100.0)   | 100.0 (100.0 - 100.0) | 100.0 (100.0 - 100.0)     | 100.0 (100.0 - 100.0) | 97.9 (96.2 - 99.7)   | 100.0 (100.0 - 100.0) | 100.0 (100.0 - 100.0) |
|                                      | 50-64    | 95.5 (93.0 - 97.9)    | 96.1 (94.1 - 98.1)    | 97.5 (94.5 - 100.0)   | 96.2 (91.4 - 100.0)   | 97.5 (93.2 - 100.0)       | 95.9 (92.2 - 99.7)    | 95.0 (93.4 - 96.6)   | 100.0 (100.0 - 100.0) | 96.4 (90.8 - 100.0)   |
|                                      | 65-79    | 93.0 (89.7 - 96.3)    | 95.0 (92.7 - 97.3)    | 91.8 (86.6 - 97.1)    | 91.7 (84.2 - 99.1)    | 91.5 (83.3 - 99.7)        | 90.4 (85.0 - 95.8)    | 91.8 (89.6 - 94.0)   | 93.8 (82.9 - 100.0)   | 90.4 (83.3 - 97.6)    |
|                                      | 80-99    | 81.5 (72.3 - 90.7)    | 78.5 (71.2 - 85.7)    | 79.5 (66.2 - 92.9)    | 60.9 (29.7 - 92.0)    | 64.9 (32.2 - 97.6)        | 83.4 (67.9 - 98.8)    | 83.2 (78.5 - 88.0)   | 70.0 (36.1 - 100.0)   | 77.7 (59.5 - 95.9)    |
| Distant                              | All ages | 54.7 (49.3 - 60.1)    | 57.5 (53.0 - 61.9)    | 54.3 (46.2 - 62.4)    | 58.1 (47.5 - 68.7)    | 51.9 (40.4 - 63.5)        | 46.8 (38.2 - 55.5)    | 60.0 (56.8 - 63.1)   | 55.7 (34.8 - 76.5)    | 60.7 (50.4 - 71.1)    |
|                                      | 15-49    | 78.4 (65.8 - 91.0)    | 74.2 (63.2 - 85.1)    | 79.2 (60.9 - 97.5)    | 89.8 (70.5 - 100.0)   | 58.7 (22.5 - 94.8)        | 59.9 (38.5 - 81.4)    | 84.9 (78.2 - 91.5)   | 83.5 (53.8 - 100.0)   | 100.0 (100.0 - 100.0) |
|                                      | 50-64    | 66.8 (58.9 - 74.7)    | 68.3 (61.1 - 75.4)    | 60.3 (48.8 - 71.8)    | 64.0 (45.7 - 82.3)    | 77.2 (61.9 - 92.5)        | 56.0 (41.6 - 70.5)    | 71.0 (66.1 - 75.9)   | 57.6 (20.8 - 94.5)    | 74.4 (62.8 - 86.0)    |
|                                      | 65-79    | 48.1 (38.6 - 57.6)    | 55.2 (47.9 - 62.4)    | 50.5 (38.0 - 62.9)    | 57.4 (42.4 - 72.4)    | 53.5 (36.6 - 70.5)        | 50.0 (37.6 - 62.4)    | 58.6 (53.4 - 63.8)   | 51.2 (15.9 - 86.6)    | 45.0 (26.3 - 63.6)    |
|                                      | 80-99    | 33.6 (22.0 - 45.2)    | 33.6 (23.5 - 43.6)    | 36.6 (12.9 - 60.4)    | 32.3 (6.0 - 58.6)     | *                         | 21.6 (3.3 - 40.0)     | 32.1 (25.3 - 38.8)   | 42.1 (0.0 - 87.5)     | 39.4 (13.6 - 65.2)    |

Abbreviation: NS = net survival, CI = confidence interval

All ages=Age-standardised

<sup>‡</sup> Model1: Age spline with mapped SEER stage as time-dependent covariate

<sup>¶</sup> Model2: Age spline allowing separate models for each stage category

\* Not possible to estimate

**Supplementary Table 17B.** Age-standardised and age-specific five-year net survival (%) by imputed stage at diagnosis for individual registries in Canada for rectal cancer patients diagnosed during 2010-2014

| Stage                                |          | Alberta             | British Columbia    | Manitoba              | New Brunswick         | Newfoundland and Labrador | Nova Scotia          | Ontario            | Prince Edward Island  | Saskatchewan          |
|--------------------------------------|----------|---------------------|---------------------|-----------------------|-----------------------|---------------------------|----------------------|--------------------|-----------------------|-----------------------|
|                                      |          | 5-year NS (95% CI)  | 5-year NS (95% CI)  | 5-year NS (95% CI)    | 5-year NS (95% CI)    | 5-year NS (95% CI)        | 5-year NS (95% CI)   | 5-year NS (95% CI) | 5-year NS (95% CI)    | 5-year NS (95% CI)    |
| All patients <sup>‡</sup>            | All ages | 64.7 (61.8 - 67.4)  | 67.3 (65.1 - 69.3)  | 65.0 (60.8 - 68.9)    | 67.7 (62.3 - 72.4)    | 71.9 (65.9 - 77.1)        | 60.0 (55.2 - 64.5)   | 68.6 (67.0 - 70.1) | 65.7 (51.9 - 76.4)    | 65.8 (61.1 - 70.1)    |
|                                      | 15-49    | 75.7 (68.9 - 81.3)  | 71.2 (64.9 - 76.6)  | 71.3 (60.4 - 79.7)    | 75.7 (61.2 - 85.4)    | 73.1 (57.6 - 83.7)        | 61.2 (48.3 - 71.8)   | 80.2 (76.7 - 83.3) | 41.4 (11.9 - 69.4)    | 72.7 (59.3 - 82.3)    |
|                                      | 50-64    | 70.5 (66.7 - 73.9)  | 71.8 (68.7 - 74.7)  | 66.4 (60.5 - 71.6)    | 78.1 (70.6 - 83.9)    | 77.8 (70.0 - 83.8)        | 72.0 (65.6 - 77.4)   | 76.3 (74.2 - 78.3) | 70.3 (49.5 - 83.8)    | 79.0 (72.7 - 84.1)    |
|                                      | 65-79    | 68.7 (64.2 - 72.8)  | 69.8 (66.5 - 72.9)  | 64.0 (57.4 - 69.9)    | 63.4 (55.5 - 70.4)    | 73.5 (64.0 - 80.8)        | 63.7 (57.3 - 69.4)   | 68.6 (66.1 - 70.9) | 77.7 (52.0 - 90.7)    | 68.5 (61.3 - 74.7)    |
|                                      | 80-99    | 39.2 (31.2 - 47.2)  | 50.9 (44.1 - 57.3)  | 63.0 (46.9 - 75.4)    | 52.7 (34.1 - 68.3)    | 59.0 (29.1 - 79.7)        | 36.6 (23.3 - 50.1)   | 49.2 (44.2 - 54.0) | 51.5 (9.1 - 83.2)     | 36.3 (25.0 - 47.6)    |
| <b>TNM Stage<sup>§</sup></b>         |          |                     |                     |                       |                       |                           |                      |                    |                       |                       |
| Stage I                              | All ages | 93.7 (88.5 - 98.9)  | 93.8 (88.2 - 99.5)  | 84.4 (76.5 - 92.3)    | 84.4 (76.2 - 92.6)    | 96.7 (87.7 - 100.0)       | 83.7 (75.4 - 91.9)   | 91.6 (88.6 - 94.7) | 89.3 (75.5 - 100.0)   | 87.4 (79.5 - 95.3)    |
|                                      | 15-49    | 97.2 (90.4 - 100.0) | 95.6 (86.1 - 100.0) | 100.0 (96.5 - 100.0)  | 92.9 (77.4 - 100.0)   | 100.0 (100.0 - 100.0)     | 91.5 (73.9 - 100.0)  | 95.1 (90.5 - 99.7) | 64.4 (9.7 - 100.0)    | 100.0 (100.0 - 100.0) |
|                                      | 50-64    | 95.8 (91.6 - 100.0) | 94.7 (89.7 - 99.8)  | 89.3 (80.3 - 98.2)    | 83.6 (72.3 - 94.9)    | 98.3 (90.6 - 100.0)       | 100.0 (96.7 - 100.0) | 96.7 (94.1 - 99.4) | 91.1 (75.0 - 100.0)   | 96.0 (88.3 - 100.0)   |
|                                      | 65-79    | 96.0 (89.4 - 100.0) | 92.1 (84.7 - 99.4)  | 83.1 (71.1 - 95.1)    | 90.8 (80.3 - 100.0)   | 97.2 (83.2 - 100.0)       | 77.4 (66.0 - 88.9)   | 92.3 (88.3 - 96.2) | 88.1 (66.6 - 100.0)   | 94.4 (84.0 - 100.0)   |
|                                      | 80-99    | 83.0 (62.8 - 100.0) | 95.4 (69.3 - 100.0) | 68.4 (39.2 - 97.6)    | 67.4 (38.0 - 96.8)    | 84.3 (35.4 - 100.0)       | 68.3 (41.9 - 94.7)   | 79.3 (66.5 - 92.0) | 100.0 (37.6 - 100.0)  | 49.4 (22.9 - 75.9)    |
| Stage II                             | All ages | 79.4 (73.6 - 85.1)  | 80.5 (76.2 - 84.9)  | 72.1 (62.4 - 81.8)    | 88.2 (79.6 - 96.9)    | 79.6 (70.8 - 88.3)        | 66.1 (55.3 - 76.8)   | 75.9 (72.0 - 79.8) | 87.9 (73.1 - 100.0)   | 79.3 (70.1 - 88.5)    |
|                                      | 15-49    | 84.0 (70.1 - 97.9)  | 83.2 (72.6 - 93.9)  | 55.2 (20.2 - 90.1)    | 85.1 (64.2 - 100.0)   | 100.0 (100.0 - 100.0)     | 71.8 (43.9 - 99.8)   | 88.4 (81.1 - 95.8) | 100.0 (100.0 - 100.0) | 83.4 (60.6 - 100.0)   |
|                                      | 50-64    | 88.1 (81.5 - 94.7)  | 86.2 (81.0 - 91.5)  | 83.0 (70.8 - 95.2)    | 95.0 (87.6 - 100.0)   | 85.5 (75.1 - 95.8)        | 76.4 (64.0 - 88.7)   | 82.7 (77.5 - 87.9) | 88.8 (68.6 - 100.0)   | 96.8 (88.8 - 100.0)   |
|                                      | 65-79    | 86.0 (77.5 - 94.5)  | 83.9 (78.0 - 89.8)  | 74.3 (59.6 - 88.9)    | 84.0 (70.4 - 97.6)    | 80.6 (66.6 - 94.6)        | 75.7 (62.9 - 88.5)   | 73.8 (68.0 - 79.6) | 83.9 (58.8 - 100.0)   | 86.0 (73.5 - 98.5)    |
|                                      | 80-99    | 40.8 (23.6 - 58.0)  | 62.3 (47.1 - 77.5)  | 60.9 (34.0 - 87.9)    | 86.4 (55.0 - 100.0)   | 45.6 (7.8 - 83.4)         | 29.7 (0.0 - 61.8)    | 60.7 (47.9 - 73.5) | 73.4 (3.7 - 100.0)    | 36.3 (13.1 - 59.4)    |
| Stage III                            | All ages | 66.7 (61.6 - 71.8)  | 74.0 (69.5 - 78.5)  | 73.6 (66.7 - 80.5)    | 70.9 (61.6 - 80.2)    | 71.4 (61.7 - 81.0)        | 69.6 (61.0 - 78.1)   | 72.1 (69.0 - 75.2) | 66.6 (46.0 - 87.2)    | 71.5 (62.4 - 80.7)    |
|                                      | 15-49    | 85.8 (77.2 - 94.5)  | 83.6 (74.7 - 92.5)  | 80.0 (66.8 - 93.2)    | 74.1 (54.5 - 93.6)    | 81.8 (67.8 - 95.9)        | 85.7 (71.8 - 99.6)   | 84.2 (78.8 - 89.6) | 96.7 (69.2 - 100.0)   | 91.7 (80.0 - 100.0)   |
|                                      | 50-64    | 73.7 (68.2 - 79.3)  | 78.4 (73.1 - 83.6)  | 75.5 (67.1 - 83.8)    | 89.4 (81.6 - 97.2)    | 78.0 (68.5 - 87.6)        | 80.8 (71.9 - 89.7)   | 83.7 (80.3 - 87.1) | 62.1 (38.0 - 86.1)    | 89.6 (81.6 - 97.5)    |
|                                      | 65-79    | 68.5 (61.2 - 75.7)  | 78.5 (72.7 - 84.4)  | 71.5 (61.4 - 81.6)    | 64.2 (50.8 - 77.7)    | 70.1 (56.7 - 83.5)        | 76.0 (65.5 - 86.5)   | 72.0 (67.6 - 76.5) | 63.8 (33.9 - 93.7)    | 67.8 (55.8 - 79.9)    |
|                                      | 80-99    | 38.2 (20.9 - 55.5)  | 52.3 (38.9 - 65.7)  | 76.0 (47.3 - 100.0)   | 47.1 (12.8 - 81.5)    | 54.1 (7.8 - 100.0)        | 19.6 (0.0 - 43.2)    | 46.5 (36.4 - 56.7) | 56.8 (0.0 - 100.0)    | 43.9 (18.1 - 69.7)    |
| Stage IV                             | All ages | 13.5 (9.6 - 17.5)   | 13.5 (10.3 - 16.8)  | 14.9 (8.6 - 21.2)     | 13.8 (7.3 - 20.3)     | 9.7 (3.7 - 15.6)          | 8.2 (3.5 - 12.8)     | 13.8 (11.0 - 16.7) | 15.9 (0.9 - 30.9)     | 15.0 (8.3 - 21.6)     |
|                                      | 15-49    | 28.7 (14.7 - 42.7)  | 23.2 (7.7 - 38.8)   | *                     | 35.6 (3.7 - 67.4)     | 14.7 (0.0 - 31.2)         | 12.8 (0.0 - 27.3)    | 34.7 (23.0 - 46.5) | *                     | 26.7 (2.0 - 51.3)     |
|                                      | 50-64    | 16.2 (9.7 - 22.7)   | 19.0 (12.7 - 25.3)  | 14.2 (5.5 - 22.9)     | 14.9 (4.4 - 25.4)     | 11.2 (0.7 - 21.8)         | 13.8 (4.0 - 23.6)    | 19.5 (14.5 - 24.5) | 37.9 (0.0 - 75.8)     | 24.1 (10.3 - 38.0)    |
|                                      | 65-79    | 12.4 (5.9 - 19.0)   | 12.6 (7.6 - 17.7)   | 15.2 (4.4 - 26.0)     | 13.5 (4.5 - 22.5)     | 7.5 (0.0 - 16.4)          | 8.1 (1.0 - 15.3)     | 10.2 (6.3 - 14.2)  | *                     | 7.9 (0.8 - 15.0)      |
|                                      | 80-99    | *                   | 2.7 (0.0 - 7.9)     | *                     | 2.4 (0.0 - 8.7)       | 4.8 (0.0 - 15.8)          | *                    | 2.9 (0.0 - 5.9)    | *                     | 9.1 (0.0 - 21.9)      |
| <b>Mapped SEER stage<sup>¶</sup></b> |          |                     |                     |                       |                       |                           |                      |                    |                       |                       |
| Localised                            | All ages | 89.5 (84.8 - 94.1)  | 89.1 (85.7 - 92.5)  | 86.1 (79.9 - 92.4)    | 88.6 (81.7 - 95.4)    | 98.0 (90.2 - 100.0)       | 81.0 (72.7 - 89.3)   | 89.6 (87.1 - 92.1) | 95.2 (85.5 - 100.0)   | 83.9 (75.9 - 91.9)    |
|                                      | 15-49    | 96.1 (90.8 - 100.0) | 92.6 (85.4 - 99.8)  | 100.0 (100.0 - 100.0) | 100.0 (100.0 - 100.0) | 100.0 (100.0 - 100.0)     | 87.5 (70.1 - 100.0)  | 95.5 (92.3 - 98.8) | 80.9 (45.7 - 100.0)   | 85.3 (65.2 - 100.0)   |
|                                      | 50-64    | 93.6 (89.5 - 97.6)  | 93.5 (89.5 - 97.6)  | 91.7 (85.0 - 98.5)    | 90.2 (81.8 - 98.6)    | 92.9 (83.4 - 100.0)       | 97.9 (92.2 - 100.0)  | 94.7 (92.3 - 97.1) | 91.9 (79.4 - 100.0)   | 93.0 (84.6 - 100.0)   |
|                                      | 65-79    | 95.3 (89.7 - 100.0) | 90.1 (85.2 - 95.0)  | 82.3 (72.4 - 92.2)    | 87.4 (76.9 - 98.0)    | 100.0 (90.2 - 100.0)      | 79.3 (69.0 - 89.7)   | 89.5 (85.8 - 93.1) | 96.1 (79.7 - 100.0)   | 94.1 (84.0 - 100.0)   |
|                                      | 80-99    | 66.5 (49.7 - 83.2)  | 75.5 (60.9 - 90.1)  | 74.7 (49.3 - 100.0)   | 75.2 (45.8 - 100.0)   | 100.0 (53.5 - 100.0)      | 62.1 (36.0 - 88.3)   | 77.3 (67.8 - 86.8) | 100.0 (55.7 - 100.0)  | 46.5 (22.5 - 70.5)    |
| Regional                             | All ages | 69.2 (65.1 - 73.3)  | 73.5 (70.2 - 76.7)  | 72.3 (66.3 - 78.2)    | 72.4 (63.4 - 81.4)    | 66.9 (56.6 - 77.3)        | 68.9 (62.3 - 75.4)   | 72.7 (69.9 - 75.6) | 64.2 (49.4 - 79.0)    | 73.6 (65.9 - 81.2)    |
|                                      | 15-49    | 84.9 (76.8 - 93.0)  | 81.7 (73.8 - 89.7)  | 71.8 (58.3 - 85.3)    | 65.8 (45.7 - 85.9)    | 85.1 (68.3 - 100.0)       | 82.6 (69.2 - 95.9)   | 84.9 (79.9 - 90.0) | 100.0 (100.0 - 100.0) | 92.4 (77.2 - 100.0)   |
|                                      | 50-64    | 77.3 (72.4 - 82.2)  | 77.7 (73.2 - 82.1)  | 76.3 (68.9 - 83.7)    | 92.1 (84.7 - 99.5)    | 78.6 (67.6 - 89.6)        | 78.5 (70.8 - 86.1)   | 83.0 (80.1 - 85.9) | 65.7 (45.6 - 85.9)    | 89.6 (81.2 - 98.1)    |
|                                      | 65-79    | 69.9 (63.7 - 76.2)  | 77.5 (73.1 - 82.0)  | 73.1 (64.0 - 82.1)    | 63.3 (50.2 - 76.3)    | 67.2 (53.1 - 81.3)        | 74.9 (66.5 - 83.3)   | 72.5 (68.2 - 76.8) | 61.5 (38.6 - 84.3)    | 70.2 (58.5 - 82.0)    |
|                                      | 80-99    | 41.4 (27.5 - 55.4)  | 53.2 (42.4 - 64.0)  | 64.7 (43.8 - 85.6)    | 53.5 (15.5 - 91.5)    | 20.4 (0.0 - 57.9)         | 27.8 (7.8 - 47.8)    | 50.2 (41.3 - 59.0) | 44.7 (2.0 - 87.3)     | 36.5 (14.4 - 58.7)    |
| Distant                              | All ages | 15.3 (11.4 - 19.1)  | 13.1 (9.4 - 16.9)   | 17.1 (11.0 - 23.2)    | 17.1 (9.5 - 24.8)     | 10.2 (2.9 - 17.5)         | 9.0 (4.3 - 13.8)     | 15.0 (11.6 - 18.4) | 16.2 (0.0 - 32.4)     | 23.0 (12.8 - 33.3)    |
|                                      | 15-49    | 26.7 (13.7 - 39.6)  | 22.5 (9.2 - 35.8)   | 36.4 (14.9 - 57.9)    | 39.0 (2.0 - 76.1)     | 10.2 (0.0 - 25.9)         | 14.5 (0.0 - 29.3)    | 35.3 (21.0 - 49.7) | *                     | 45.6 (4.7 - 86.5)     |
|                                      | 50-64    | 18.7 (12.3 - 25.1)  | 18.6 (12.2 - 25.0)  | 17.1 (8.0 - 26.1)     | 18.5 (4.3 - 32.7)     | 16.8 (1.7 - 31.8)         | 13.3 (3.8 - 22.9)    | 21.3 (15.7 - 26.8) | 48.6 (11.1 - 86.0)    | 26.5 (9.5 - 43.4)     |
|                                      | 65-79    | 15.6 (8.8 - 22.5)   | 11.9 (5.8 - 18.0)   | 13.8 (4.4 - 23.3)     | 16.4 (5.4 - 27.3)     | 12.0 (0.0 - 24.8)         | 10.1 (2.3 - 17.9)    | 12.0 (7.5 - 16.5)  | 0.2 (0.0 - 1.6)       | 11.3 (0.3 - 22.2)     |
|                                      | 80-99    | 3.3 (0.0 - 8.7)     | 2.5 (0.0 - 6.7)     | 4.4 (0.0 - 22.0)      | 3.1 (0.0 - 13.6)      | 2.8 (0.0 - 13.4)          | *                    | 2.8 (0.0 - 5.7)    | *                     | 14.3 (0.0 - 34.5)     |

Abbreviation: NS = net survival, CI = confidence interval

All ages=Age-standardised

<sup>‡</sup> Model1: Age spline with mapped SEER stage as time-dependent covariate

<sup>§</sup> Model2: Age spline allowing separate models for each stage category

<sup>¶</sup> Not possible to estimate

**Supplementary Table 18A.** Age-standardised and age-specific one-year net survival (%) by stage at diagnosis (without imputation) for individual registries in Canada for colon cancer patients diagnosed during 2010-2014

| Stage                                |          | Alberta               | British Columbia      | Manitoba              | New Brunswick         | Newfoundland and Labrador | Nova Scotia           | Ontario               | Prince Edward Island  | Saskatchewan          |
|--------------------------------------|----------|-----------------------|-----------------------|-----------------------|-----------------------|---------------------------|-----------------------|-----------------------|-----------------------|-----------------------|
|                                      |          | 1-year NS (95% CI)        | 1-year NS (95% CI)    | 1-year NS (95% CI)    | 1-year NS (95% CI)    | 1-year NS (95% CI)    |
| All patients <sup>1</sup>            | All ages | 82.2 (81.0 - 83.3)    | 83.6 (82.7 - 84.4)    | 81.5 (79.5 - 83.2)    | 84.1 (82.0 - 86.0)    | 84.7 (82.5 - 86.6)        | 78.6 (76.6 - 80.5)    | 84.2 (83.6 - 84.7)    | 84.0 (78.9 - 87.9)    | 82.5 (80.6 - 84.2)    |
|                                      | 15-49    | 89.2 (85.6 - 92.0)    | 90.7 (87.7 - 93.0)    | 87.6 (80.9 - 92.1)    | 91.6 (82.0 - 96.2)    | 91.7 (83.1 - 96.0)        | 89.1 (80.5 - 94.0)    | 91.2 (89.6 - 92.7)    | 93.4 (60.1 - 99.1)    | 93.1 (87.0 - 96.4)    |
|                                      | 50-64    | 87.8 (85.9 - 89.5)    | 87.7 (86.1 - 89.2)    | 86.4 (82.8 - 89.2)    | 91.8 (88.1 - 94.3)    | 88.3 (84.6 - 91.2)        | 84.0 (80.3 - 87.1)    | 89.0 (88.0 - 89.9)    | 90.2 (80.7 - 95.2)    | 88.8 (85.6 - 91.3)    |
|                                      | 65-79    | 82.3 (80.3 - 84.1)    | 84.6 (83.2 - 85.9)    | 82.2 (79.1 - 85.0)    | 85.5 (82.3 - 88.2)    | 82.9 (79.5 - 85.7)        | 79.7 (76.7 - 82.4)    | 84.0 (83.0 - 84.9)    | 82.2 (74.8 - 87.6)    | 82.3 (79.1 - 85.1)    |
|                                      | 80-99    | 68.0 (64.7 - 71.1)    | 69.3 (67.0 - 71.5)    | 68.2 (63.3 - 72.6)    | 63.3 (57.3 - 68.6)    | 76.7 (69.3 - 82.6)        | 60.4 (55.3 - 65.1)    | 71.7 (70.2 - 73.2)    | 74.2 (59.7 - 84.2)    | 66.0 (60.9 - 70.5)    |
| <b>TNM Stage<sup>2</sup></b>         |          |                       |                       |                       |                       |                           |                       |                       |                       |                       |
| Stage I                              | All ages | 96.3 (94.6 - 97.5)    | 59.9 (50.4 - 68.1)    | 50.9 (48.3 - 53.4)    | 89.0 (85.7 - 91.6)    | 97.4 (94.4 - 98.8)        | 98.0 (93.3 - 99.4)    | 65.8 (51.4 - 76.9)    | 43.0 (39.0 - 46.9)    | 91.0 (90.1 - 91.9)    |
|                                      | 15-49    | 98.4 (93.1 - 99.6)    | 100.0 (100.0 - 100.0) | 67.5 (58.2 - 75.2)    | 97.8 (82.7 - 99.7)    | 100.0 (100.0 - 100.0)     | 100.0 (100.0 - 100.0) | 82.9 (46.6 - 95.5)    | 67.3 (51.1 - 79.2)    | 97.7 (95.2 - 98.9)    |
|                                      | 50-64    | 98.7 (95.8 - 99.6)    | 69.9 (37.9 - 87.6)    | 67.0 (56.0 - 65.1)    | 91.6 (85.8 - 95.2)    | 100.0 (100.0 - 100.0)     | 99.4 (64.1 - 100.0)   | 100.0 (100.0 - 100.0) | 55.0 (47.7 - 61.6)    | 95.2 (93.7 - 96.3)    |
|                                      | 65-79    | 97.8 (94.6 - 99.1)    | 50.5 (34.7 - 64.3)    | 48.8 (44.7 - 52.7)    | 89.8 (84.4 - 93.4)    | 98.3 (90.3 - 99.7)        | 96.9 (88.1 - 99.2)    | 41.9 (21.7 - 60.9)    | 37.6 (31.7 - 43.5)    | 90.5 (88.8 - 91.8)    |
|                                      | 80-99    | 87.3 (79.7 - 92.2)    | 34.3 (24.2 - 44.6)    | 25.2 (20.8 - 30.0)    | 75.2 (63.3 - 83.7)    | 87.6 (75.4 - 94.0)        | 94.7 (62.2 - 99.4)    | 64.7 (33.9 - 83.9)    | 20.1 (14.0 - 27.0)    | 80.7 (77.7 - 83.3)    |
| Stage II                             | All ages | 96.3 (94.7 - 97.4)    | 98.1 (96.8 - 98.9)    | 77.2 (73.9 - 80.1)    | 41.0 (35.8 - 46.2)    | 92.0 (88.4 - 94.6)        | 95.9 (92.4 - 97.8)    | 90.1 (87.4 - 92.3)    | 34.7 (12.2 - 58.8)    | 50.7 (48.9 - 52.5)    |
|                                      | 15-49    | 98.4 (87.3 - 99.8)    | 98.6 (88.7 - 99.8)    | 97.7 (83.4 - 99.7)    | 59.8 (41.9 - 73.8)    | 100.0 (100.0 - 100.0)     | 100.0 (100.0 - 100.0) | 100.0 (100.0 - 100.0) | 100.0 (100.0 - 100.0) | 70.3 (64.8 - 75.2)    |
|                                      | 50-64    | 98.5 (95.5 - 99.5)    | 98.9 (96.5 - 99.7)    | 94.4 (87.8 - 97.5)    | 52.6 (42.6 - 61.7)    | 97.6 (90.2 - 99.4)        | 98.0 (87.4 - 99.7)    | 95.7 (91.0 - 98.0)    | 34.7 (1.2 - 77.8)     | 61.8 (58.4 - 64.9)    |
|                                      | 65-79    | 96.8 (93.9 - 98.3)    | 98.2 (96.0 - 99.2)    | 74.8 (68.1 - 80.3)    | 36.3 (28.4 - 44.2)    | 94.7 (88.2 - 97.7)        | 94.8 (88.8 - 97.6)    | 94.5 (90.4 - 96.8)    | 31.5 (11.0 - 54.6)    | 47.7 (44.8 - 50.5)    |
|                                      | 80-99    | 89.9 (84.1 - 93.7)    | 96.1 (90.1 - 98.5)    | 41.6 (35.7 - 47.3)    | 23.5 (15.3 - 32.8)    | 71.3 (58.2 - 80.9)        | 90.5 (72.8 - 96.9)    | 66.1 (56.6 - 74.0)    | 19.1 (9.7 - 30.8)     | 25.2 (22.0 - 28.5)    |
| Stage III                            | All ages | 91.0 (89.0 - 92.6)    | 95.3 (94.1 - 96.3)    | 95.8 (92.7 - 97.6)    | 36.6 (17.3 - 56.2)    | 54.7 (49.1 - 59.9)        | 86.6 (82.1 - 90.1)    | 91.4 (89.1 - 93.2)    | 97.0 (96.2 - 97.6)    | 72.2 (69.9 - 74.4)    |
|                                      | 15-49    | 97.2 (90.9 - 99.1)    | 100.0 (100.0 - 100.0) | 100.0 (100.0 - 100.0) | 51.4 (0.9 - 91.1)     | 74.6 (45.5 - 89.6)        | 100.0 (100.0 - 100.0) | 97.2 (79.9 - 99.6)    | 98.5 (95.8 - 99.5)    | 94.2 (89.3 - 96.9)    |
|                                      | 50-64    | 94.2 (91.1 - 96.2)    | 96.9 (94.6 - 98.3)    | 99.7 (92.9 - 100.0)   | 100.0 (100.0 - 100.0) | 70.2 (58.5 - 79.2)        | 91.5 (84.1 - 95.6)    | 93.8 (89.2 - 96.5)    | 98.9 (97.6 - 99.5)    | 87.3 (83.5 - 90.2)    |
|                                      | 65-79    | 90.3 (86.9 - 92.9)    | 95.6 (93.6 - 97.0)    | 97.2 (90.4 - 99.2)    | 50.7 (17.9 - 76.5)    | 51.9 (43.3 - 59.7)        | 84.3 (77.3 - 89.3)    | 92.6 (88.8 - 95.1)    | 96.9 (95.5 - 97.9)    | 69.8 (65.5 - 73.6)    |
|                                      | 80-99    | 82.9 (76.1 - 88.0)    | 89.4 (85.4 - 92.3)    | 84.6 (72.9 - 91.5)    | 25.0 (12.0 - 40.3)    | 17.8 (10.1 - 27.2)        | 74.5 (54.9 - 86.6)    | 80.4 (73.2 - 85.9)    | 92.9 (89.8 - 95.1)    | 40.4 (35.8 - 45.0)    |
| Stage IV                             | All ages | 47.3 (44.2 - 50.3)    | 90.6 (89.1 - 91.9)    | 95.0 (92.3 - 96.8)    | 98.6 (93.2 - 99.7)    | 68.3 (57.7 - 76.8)        | 51.1 (44.7 - 57.1)    | 89.0 (86.5 - 91.1)    | 94.9 (94.1 - 95.6)    | 92.0 (79.6 - 97.0)    |
|                                      | 15-49    | 61.7 (51.0 - 70.7)    | 97.1 (92.2 - 99.0)    | 94.0 (77.2 - 98.6)    | 100.0 (100.0 - 100.0) | 84.7 (51.2 - 96.0)        | 74.4 (48.9 - 88.5)    | 97.2 (80.0 - 99.6)    | 98.1 (95.3 - 99.3)    | 85.9 (83.2 - 97.9)    |
|                                      | 50-64    | 61.8 (56.4 - 66.8)    | 94.1 (91.5 - 95.9)    | 98.8 (89.9 - 99.9)    | 99.1 (76.5 - 100.0)   | 79.1 (47.2 - 92.9)        | 58.3 (47.0 - 68.0)    | 96.6 (92.3 - 98.5)    | 97.5 (96.1 - 98.4)    | 100.0 (100.0 - 100.0) |
|                                      | 65-79    | 43.9 (39.0 - 48.6)    | 91.6 (89.2 - 93.4)    | 94.5 (89.4 - 97.2)    | 98.0 (87.9 - 99.7)    | 75.1 (55.8 - 86.8)        | 41.9 (21.7 - 60.9)    | 48.0 (38.5 - 56.8)    | 88.6 (84.4 - 91.7)    | 96.8 (80.2 - 99.6)    |
|                                      | 80-99    | 20.2 (15.0 - 25.9)    | 78.9 (74.3 - 82.8)    | 89.3 (80.7 - 94.2)    | 98.0 (27.6 - 100.0)   | 25.9 (12.6 - 41.5)        | 26.0 (12.8 - 41.5)    | 69.5 (61.1 - 76.5)    | 88.1 (85.7 - 90.2)    | 77.0 (44.2 - 92.0)    |
| Missing                              | All ages | 59.9 (50.4 - 68.1)    | 77.2 (73.9 - 80.1)    | 36.6 (17.3 - 56.2)    | 68.3 (57.7 - 76.8)    | 65.8 (51.4 - 76.9)        | 34.7 (12.2 - 58.8)    | 72.2 (69.9 - 74.4)    | 29.1 (2.2 - 67.1)     | 53.3 (41.0 - 64.1)    |
|                                      | 15-49    | 100.0 (100.0 - 100.0) | 97.7 (83.4 - 99.7)    | 51.4 (0.9 - 91.1)     | 84.7 (51.2 - 96.0)    | 82.9 (46.6 - 95.5)        | 100.0 (100.0 - 100.0) | 94.2 (89.3 - 96.9)    | *                     | 100.0 (100.0 - 100.0) |
|                                      | 50-64    | 69.9 (37.9 - 87.6)    | 94.4 (87.8 - 97.5)    | 100.0 (100.0 - 100.0) | 79.1 (47.2 - 92.9)    | 100.0 (100.0 - 100.0)     | 34.7 (1.2 - 77.8)     | 87.3 (83.5 - 90.2)    | 51.8 (0.8 - 91.3)     | 60.4 (32.1 - 80.0)    |
|                                      | 65-79    | 50.5 (34.7 - 64.3)    | 74.8 (68.1 - 80.3)    | 50.7 (17.9 - 76.5)    | 75.1 (55.8 - 86.8)    | 41.9 (21.7 - 60.9)        | 31.5 (11.0 - 54.6)    | 69.8 (65.5 - 73.6)    | 26.7 (0.5 - 72.3)     | 34.2 (17.2 - 52.0)    |
|                                      | 80-99    | 34.3 (24.2 - 44.6)    | 41.6 (35.7 - 47.3)    | 25.0 (12.0 - 40.3)    | 25.9 (12.6 - 41.5)    | 64.7 (33.9 - 83.9)        | 19.1 (9.7 - 30.8)     | 40.4 (35.8 - 45.0)    | 25.5 (7.1 - 49.3)     | 38.8 (24.9 - 52.6)    |
| <b>Mapped SEER stage<sup>3</sup></b> |          |                       |                       |                       |                       |                           |                       |                       |                       |                       |
| Localised                            | All ages | 96.8 (95.5 - 97.7)    | 97.2 (96.2 - 97.9)    | 96.3 (94.1 - 97.7)    | 98.2 (95.8 - 99.3)    | 97.9 (95.2 - 99.1)        | 90.7 (88.4 - 92.5)    | 96.9 (96.3 - 97.4)    | 95.3 (88.5 - 98.1)    | 95.5 (93.9 - 96.7)    |
|                                      | 15-49    | 98.6 (93.9 - 99.7)    | 99.4 (93.7 - 99.9)    | 100.0 (100.0 - 100.0) | 100.0 (100.0 - 100.0) | 100.0 (100.0 - 100.0)     | 100.0 (100.0 - 100.0) | 98.8 (96.9 - 99.5)    | 90.1 (46.9 - 98.6)    | 96.0 (87.5 - 98.7)    |
|                                      | 50-64    | 98.9 (96.8 - 99.6)    | 98.5 (97.0 - 99.3)    | 98.8 (93.1 - 99.8)    | 99.8 (0.1 - 100.0)    | 99.9 (0.0 - 100.0)        | 95.1 (91.0 - 97.3)    | 98.7 (97.8 - 99.3)    | 97.0 (85.0 - 99.4)    | 99.0 (96.2 - 99.8)    |
|                                      | 65-79    | 97.9 (95.6 - 99.0)    | 97.2 (95.6 - 98.2)    | 97.7 (93.0 - 99.3)    | 98.9 (91.8 - 99.9)    | 95.7 (91.1 - 98.0)        | 94.3 (90.8 - 96.5)    | 96.8 (95.8 - 97.6)    | 98.5 (83.6 - 99.9)    | 96.1 (93.5 - 97.7)    |
|                                      | 80-99    | 89.5 (84.2 - 93.1)    | 93.0 (89.4 - 95.4)    | 87.4 (79.4 - 92.4)    | 92.4 (82.3 - 96.8)    | 97.8 (57.2 - 99.9)        | 71.1 (63.4 - 77.4)    | 93.0 (90.9 - 94.6)    | 90.6 (68.2 - 97.5)    | 87.5 (81.8 - 91.5)    |
| Regional                             | All ages | 92.4 (90.9 - 93.7)    | 91.8 (90.7 - 92.8)    | 90.4 (87.9 - 92.5)    | 90.9 (87.1 - 93.6)    | 87.6 (83.8 - 90.6)        | 90.0 (88.2 - 91.5)    | 91.8 (91.1 - 92.5)    | 93.3 (88.1 - 96.3)    | 91.6 (89.5 - 93.2)    |
|                                      | 15-49    | 97.4 (92.7 - 99.1)    | 98.0 (94.4 - 99.3)    | 94.8 (84.0 - 98.4)    | 96.0 (73.2 - 99.5)    | 100.0 (100.0 - 100.0)     | 97.0 (87.9 - 99.3)    | 97.3 (95.2 - 98.4)    | 100.0 (100.0 - 100.0) | 98.6 (87.4 - 99.9)    |
|                                      | 50-64    | 95.3 (92.8 - 96.9)    | 94.8 (92.8 - 96.2)    | 93.9 (89.4 - 96.5)    | 98.2 (91.8 - 99.6)    | 92.3 (85.9 - 95.9)        | 96.8 (93.9 - 98.4)    | 95.5 (94.3 - 96.5)    | 98.5 (78.1 - 99.9)    | 96.8 (93.5 - 98.4)    |
|                                      | 65-79    | 92.3 (89.6 - 94.3)    | 92.8 (91.0 - 94.3)    | 90.2 (86.0 - 93.2)    | 93.5 (87.6 - 96.7)    | 85.0 (79.0 - 89.5)        | 89.6 (86.6 - 92.0)    | 91.8 (90.5 - 92.9)    | 87.7 (77.4 - 93.5)    | 90.8 (87.3 - 93.4)    |
|                                      | 80-99    | 84.0 (78.9 - 88.0)    | 81.5 (77.9 - 84.5)    | 80.8 (72.4 - 86.8)    | 71.2 (59.4 - 80.1)    | 76.6 (60.7 - 86.7)        | 73.7 (67.8 - 78.8)    | 82.0 (79.7 - 84.1)    | 90.5 (69.3 - 97.3)    | 81.2 (74.6 - 86.2)    |
| Distant                              | All ages | 49.3 (46.3 - 52.2)    | 51.6 (49.1 - 54.1)    | 43.1 (37.8 - 48.2)    | 56.1 (50.5 - 61.2)    | 51.2 (44.9 - 57.1)        | 45.3 (41.4 - 49.1)    | 52.5 (50.8 - 54.2)    | 51.3 (42.5 - 59.4)    | 50.3 (46.8 - 53.8)    |
|                                      | 15-49    | 62.5 (51.9 - 71.4)    | 68.4 (59.3 - 75.9)    | 60.8 (43.0 - 74.5)    | 76.1 (48.0 - 90.3)    | 70.7 (45.9 - 85.6)        | 69.4 (53.8 - 80.6)    | 71.8 (66.4 - 76.4)    | 89.7 (45.1 - 98.5)    | 76.8 (64.5 - 85.4)    |
|                                      | 50-64    | 62.9 (57.7 - 67.7)    | 61.6 (57.0 - 65.9)    | 54.6 (44.8 - 63.4)    | 72.0 (60.5 - 80.7)    | 59.1 (48.1 - 68.6)        | 55.7 (48.7 - 62.1)    | 63.4 (60.2 - 66.4)    | 57.2 (37.9 - 72.5)    | 62.1 (55.5 - 68.0)    |
|                                      | 65-79    | 46.8 (42.0 - 51.4)    | 49.4 (45.4 - 53.3)    | 37.5 (29.7 - 45.4)    | 52.5 (44.0 - 60.3)    | 49.5 (40.3 - 58.1)        | 41.6 (35.8 - 47.4)    | 49.3 (46.5 - 52.1)    | 46.6 (34.4 - 57.9)    | 44.0 (38.2 - 49.7)    |
|                                      | 80-99    | 22.3 (17.1 - 28.0)    | 25.9 (21.5 - 30.6)    | 26.9 (18.4 - 36.1)    | 19.9 (11.8 - 29.5)    | 24.9 (12.2 - 39.9)        | 20.9 (14.9 - 27.6)    | 27.8 (24.6 - 31.1)    | 23.1 (9.9 - 39.5)     | 24.9 (18.8 - 31.4)    |
| Missing                              | All ages | 53.5 (41.5 - 64.1)    | 71.1 (66.0 - 75.5)    | 29.2 (10.8 - 50.6)    | 65.8 (53.9 - 75.2)    | 46.6 (25.0 - 65.7)        | 25.6 (7.0 - 49.7)     | 71.4 (69.1 - 73.7)    | 53.8 (32.6 - 71.0)    | 39.0 (19.5 - 58.1)    |
|                                      | 15-49    | 100.0 (100.0 - 100.0) | 89.0 (42.9 - 98.4)    | 51.4 (0.9 - 91.1)     | 91.8 (53.5 - 98.8)    | *                         | 100.0 (100.0 - 100.0) | 94.1 (88.9 - 96.9)    | *                     | *                     |
|                                      | 50-64    | 70.0 (23.2 - 91.7)    | 86.4 (71.6 - 93.8)    | *                     | 68.7 (36.1 - 87.1)    | 100.0 (100.0 - 100.0)     | 7.0 (0.0 - 57.1)      | 87.1 (83.2 - 90.2)    | 100.0 (100.0 - 100.0) | 57.1 (28.3 - 78.0)    |
|                                      | 65-79    | 31.7 (16.3 - 48.2)    | 68.5 (59.7 - 75.7)    | 50.2 (14.3 - 78.3)    | 77.6 (58.1 - 88.8)    | 12.3 (0.8 - 40.4)         | 22.6 (3.1 - 52.7)     | 68.6 (64.2 - 72.5)    | 52.0 (0.7 - 91.7)     | 18.3 (4.6 - 39.2)     |
|                                      | 80-99    | 35.0 (23.9 - 46.4)    | 38.9 (32.7 - 45.1)    | 26.2 (12.4 - 42.4)    | 27.4 (13.3 - 43.6)    | 36.2 (7.3 - 67.4)         | 22.2 (11.1 - 35.8)    | 39.3 (34.6 - 43.9)    | 20.0 (4.3 - 43.8)     | 39.9 (26.6 - 52.8)    |

Abbreviation: NS = net survival, CI = confidence interval

All ages=Age-standardised

<sup>1</sup> Model1: Age spline with mapped SEER stage as time-dependent covariate

<sup>2</sup> Model2: Age spline using separate models for each stage category

\* Not possible to estimate

**Supplementary Table 18B.** Age-standardised and age-specific five-year net survival (%) by stage at diagnosis (without imputation) for individual registries in Canada for colon cancer patients diagnosed during 2010-2014

| Stage                                |          | Alberta               | British Columbia      | Manitoba              | New Brunswick         | Newfoundland and Labrador | Nova Scotia           | Ontario               | Prince Edward Island  | Saskatchewan          |
|--------------------------------------|----------|-----------------------|-----------------------|-----------------------|-----------------------|---------------------------|-----------------------|-----------------------|-----------------------|-----------------------|
|                                      |          | 5-year NS (95% CI)        | 5-year NS (95% CI)    | 5-year NS (95% CI)    | 5-year NS (95% CI)    | 5-year NS (95% CI)    |
| All patients <sup>†</sup>            | All ages | 65.1 (63.5 - 66.7)    | 65.9 (64.6 - 67.2)    | 64.2 (61.6 - 66.7)    | 68.3 (65.2 - 71.2)    | 73.4 (70.2 - 76.4)        | 62.2 (59.6 - 64.7)    | 68.3 (67.4 - 69.1)    | 62.0 (54.7 - 68.6)    | 64.7 (61.9 - 67.3)    |
|                                      | 15-49    | 72.7 (67.9 - 77.0)    | 67.2 (62.8 - 71.2)    | 69.8 (61.5 - 76.7)    | 74.1 (63.0 - 82.3)    | 72.3 (60.6 - 81.1)        | 62.5 (52.5 - 70.9)    | 72.7 (70.1 - 75.1)    | 49.8 (24.3 - 70.9)    | 69.6 (60.3 - 77.1)    |
|                                      | 50-64    | 68.7 (66.0 - 71.1)    | 68.1 (65.9 - 70.3)    | 68.3 (64.0 - 72.3)    | 70.1 (65.0 - 74.6)    | 72.8 (67.8 - 77.1)        | 66.3 (61.9 - 70.3)    | 71.3 (69.9 - 72.7)    | 75.2 (62.3 - 84.2)    | 71.5 (67.1 - 75.4)    |
|                                      | 65-79    | 66.3 (63.7 - 68.8)    | 68.1 (66.1 - 70.0)    | 64.3 (60.3 - 67.9)    | 71.0 (66.4 - 75.0)    | 72.8 (68.2 - 76.9)        | 64.6 (60.7 - 68.2)    | 67.7 (66.4 - 69.0)    | 60.2 (50.6 - 68.6)    | 65.1 (60.9 - 69.0)    |
|                                      | 80-99    | 51.6 (46.7 - 56.2)    | 56.1 (52.6 - 59.5)    | 53.5 (46.7 - 59.9)    | 57.8 (49.1 - 65.5)    | 76.7 (62.7 - 86.0)        | 48.3 (41.6 - 54.7)    | 61.6 (59.1 - 64.0)    | 53.2 (31.5 - 70.8)    | 49.5 (42.3 - 56.3)    |
| <b>TNM Stage<sup>‡</sup></b>         |          |                       |                       |                       |                       |                           |                       |                       |                       |                       |
| Stage I                              | All ages | 96.2 (90.1 - 98.5)    | 94.2 (91.9 - 95.9)    | 53.3 (41.0 - 64.1)    | 13.1 (11.1 - 15.4)    | 68.1 (64.9 - 71.1)        | 86.2 (81.4 - 89.8)    | 100.0 (100.0 - 100.0) | 48.5 (36.3 - 59.7)    | 9.9 (6.0 - 14.9)      |
|                                      | 15-49    | 100.0 (100.0 - 100.0) | 100.0 (100.0 - 100.0) | 100.0 (100.0 - 100.0) | 22.5 (15.3 - 30.6)    | 70.9 (60.2 - 79.2)        | 83.7 (66.0 - 92.7)    | 93.8 (53.7 - 99.3)    | 85.4 (50.5 - 96.4)    | 11.1 (1.1 - 34.0)     |
|                                      | 50-64    | 97.8 (75.5 - 99.8)    | 98.8 (94.4 - 99.8)    | 60.4 (32.1 - 80.0)    | 18.1 (14.3 - 22.4)    | 75.8 (70.5 - 80.2)        | 92.6 (84.8 - 96.5)    | 96.9 (79.7 - 99.6)    | 62.5 (33.9 - 81.5)    | 13.6 (7.0 - 22.5)     |
|                                      | 65-79    | 93.2 (82.7 - 97.5)    | 95.4 (91.3 - 97.6)    | 34.2 (17.2 - 52.0)    | 10.6 (7.7 - 14.1)     | 69.0 (64.2 - 73.3)        | 81.7 (74.1 - 87.3)    | 99.6 (0.0 - 100.0)    | 37.9 (18.8 - 56.8)    | 7.5 (3.0 - 14.8)      |
|                                      | 80-99    | 97.7 (9.2 - 100.0)    | 80.0 (70.9 - 86.6)    | 38.8 (24.9 - 52.6)    | 2.0 (0.4 - 6.1)       | 51.6 (41.5 - 60.7)        | 84.4 (65.4 - 93.4)    | 100.0 (100.0 - 100.0) | 15.5 (4.8 - 31.8)     | *                     |
| Stage II                             | All ages | 94.0 (88.1 - 97.0)    | 94.1 (91.5 - 95.9)    | 92.2 (88.6 - 94.8)    | 28.1 (13.9 - 44.2)    | 13.2 (11.1 - 15.5)        | 67.6 (62.6 - 72.1)    | 92.8 (86.5 - 96.2)    | 91.3 (78.5 - 96.6)    | 54.1 (38.9 - 67.0)    |
|                                      | 15-49    | 100.0 (100.0 - 100.0) | 94.4 (78.5 - 98.6)    | 98.3 (91.1 - 99.7)    | 74.5 (28.6 - 93.3)    | 20.1 (13.1 - 28.2)        | 81.4 (66.3 - 90.1)    | 100.0 (100.0 - 100.0) | *                     | 69.7 (29.2 - 89.9)    |
|                                      | 50-64    | 97.8 (76.5 - 99.8)    | 97.0 (92.3 - 98.9)    | 94.7 (90.2 - 97.2)    | 34.8 (14.3 - 56.4)    | 16.3 (12.6 - 20.4)        | 70.4 (62.4 - 77.0)    | 92.2 (82.2 - 96.7)    | 93.5 (74.1 - 98.5)    | 90.2 (47.1 - 98.6)    |
|                                      | 65-79    | 90.1 (77.4 - 95.9)    | 94.5 (90.5 - 96.8)    | 95.2 (88.1 - 98.1)    | 24.2 (11.3 - 39.8)    | 12.3 (8.9 - 16.4)         | 65.1 (57.4 - 71.7)    | 91.8 (81.5 - 96.5)    | 91.1 (70.8 - 97.5)    | 36.3 (17.9 - 55.1)    |
|                                      | 80-99    | 86.4 (62.4 - 95.6)    | 89.6 (82.2 - 94.1)    | 77.9 (63.0 - 87.4)    | 3.1 (0.3 - 12.1)      | 4.0 (1.9 - 7.2)           | 55.8 (40.4 - 68.7)    | 92.2 (46.2 - 99.2)    | 76.8 (14.2 - 96.5)    | 48.8 (18.8 - 73.6)    |
| Stage III                            | All ages | 50.3 (41.2 - 58.7)    | 91.3 (88.4 - 93.4)    | 89.7 (86.7 - 92.1)    | 95.3 (90.3 - 97.7)    | 63.6 (60.2 - 66.9)        | 12.0 (9.1 - 15.3)     | 80.0 (74.3 - 84.5)    | 91.5 (84.0 - 95.5)    | 87.8 (83.2 - 91.2)    |
|                                      | 15-49    | 89.7 (45.1 - 98.5)    | 97.8 (82.8 - 99.7)    | 94.7 (84.1 - 98.3)    | 93.2 (82.7 - 97.4)    | 79.8 (69.3 - 87.0)        | 26.4 (13.9 - 40.8)    | 97.7 (68.4 - 99.9)    | 100.0 (100.0 - 100.0) | 100.0 (100.0 - 100.0) |
|                                      | 50-64    | 54.2 (34.5 - 70.3)    | 97.5 (93.3 - 99.1)    | 90.2 (85.8 - 93.3)    | 96.2 (91.1 - 98.4)    | 79.6 (73.4 - 84.6)        | 15.6 (10.0 - 22.2)    | 78.0 (68.2 - 85.1)    | 91.9 (79.7 - 96.9)    | 93.4 (86.5 - 96.8)    |
|                                      | 65-79    | 47.2 (34.6 - 58.7)    | 90.0 (85.1 - 93.4)    | 88.8 (83.9 - 92.2)    | 98.4 (81.9 - 99.9)    | 63.1 (56.7 - 68.9)        | 8.5 (5.2 - 12.9)      | 80.3 (70.1 - 87.4)    | 92.0 (77.4 - 97.3)    | 91.0 (83.3 - 95.2)    |
|                                      | 80-99    | 21.1 (8.3 - 37.7)     | 81.0 (71.8 - 87.5)    | 87.7 (74.0 - 94.5)    | 87.2 (59.9 - 96.4)    | 30.2 (24.6 - 35.9)        | *                     | 65.8 (44.8 - 80.4)    | 80.1 (32.0 - 95.8)    | 64.1 (50.3 - 74.9)    |
| Stage IV                             | All ages | 29.1 (2.2 - 67.1)     | 49.3 (45.4 - 53.2)    | 71.2 (67.9 - 74.2)    | 87.0 (83.9 - 89.5)    | 89.6 (83.5 - 93.6)        | 21.2 (7.6 - 39.2)     | 12.3 (8.3 - 17.1)     | 60.8 (52.1 - 68.5)    | 85.4 (81.6 - 88.4)    |
|                                      | 15-49    | *                     | 78.2 (64.0 - 87.3)    | 87.7 (79.4 - 92.8)    | 95.4 (86.6 - 98.5)    | 94.9 (59.4 - 99.5)        | 51.6 (0.8 - 91.3)     | 19.4 (6.9 - 36.7)     | 74.7 (43.8 - 90.2)    | 88.0 (71.9 - 95.2)    |
|                                      | 50-64    | 51.8 (0.8 - 91.3)     | 60.4 (52.9 - 67.1)    | 78.4 (73.6 - 82.5)    | 87.2 (81.9 - 91.0)    | 96.7 (85.0 - 99.3)        | 83.3 (13.6 - 98.3)    | 18.8 (11.5 - 27.5)    | 65.8 (55.0 - 74.6)    | 85.7 (79.3 - 90.3)    |
|                                      | 65-79    | 26.7 (0.5 - 72.3)     | 43.2 (36.7 - 49.6)    | 70.5 (65.4 - 75.0)    | 84.8 (79.9 - 88.6)    | 96.5 (79.4 - 99.5)        | 17.7 (3.5 - 41.0)     | 13.7 (8.1 - 20.8)     | 60.8 (51.1 - 68.8)    | 84.4 (78.7 - 88.8)    |
|                                      | 80-99    | 25.5 (7.1 - 49.3)     | 24.0 (17.5 - 31.0)    | 49.6 (39.4 - 58.9)    | 85.9 (74.5 - 92.5)    | 64.0 (47.3 - 76.6)        | 9.8 (1.8 - 26.4)      | 2.0 (0.4 - 6.6)       | 58.5 (25.7 - 80.9)    | 80.5 (66.6 - 89.1)    |
| Missing                              | All ages | 28.1 (13.9 - 44.2)    | 63.6 (60.2 - 66.9)    | 21.2 (7.6 - 39.2)     | 48.5 (36.3 - 59.7)    | 54.1 (38.9 - 67.0)        | 31.2 (10.7 - 54.5)    | 55.7 (53.3 - 58.0)    | 12.4 (0.8 - 40.3)     | 33.5 (22.8 - 44.5)    |
|                                      | 15-49    | 74.5 (28.6 - 93.3)    | 79.8 (69.3 - 87.0)    | 51.6 (0.8 - 91.3)     | 85.4 (50.5 - 96.4)    | 69.7 (29.2 - 89.9)        | 100.0 (100.0 - 100.0) | 78.2 (72.6 - 82.8)    | 100.0 (100.0 - 100.0) | 76.0 (11.9 - 96.5)    |
|                                      | 50-64    | 34.8 (14.3 - 56.4)    | 79.6 (73.4 - 84.6)    | 83.3 (13.6 - 98.3)    | 62.5 (33.9 - 81.5)    | 90.2 (47.1 - 98.6)        | 32.6 (1.2 - 75.3)     | 70.7 (66.6 - 74.5)    | 38.4 (1.3 - 81.1)     | 42.0 (19.0 - 63.6)    |
|                                      | 65-79    | 24.2 (11.3 - 39.8)    | 63.1 (56.7 - 68.9)    | 17.7 (3.5 - 41.0)     | 37.9 (18.8 - 56.8)    | 36.3 (17.9 - 55.1)        | 26.0 (8.3 - 48.3)     | 52.4 (48.2 - 56.4)    | 19.2 (0.5 - 60.3)     | 12.3 (3.9 - 25.9)     |
|                                      | 80-99    | 3.1 (0.3 - 12.1)      | 30.2 (24.6 - 35.9)    | 9.8 (1.8 - 26.4)      | 15.5 (4.8 - 31.8)     | 48.8 (18.8 - 73.6)        | 6.1 (1.4 - 16.0)      | 26.1 (21.9 - 30.6)    | 8.4 (0.5 - 32.1)      | 12.6 (3.3 - 28.4)     |
| <b>Mapped SEER stage<sup>§</sup></b> |          |                       |                       |                       |                       |                           |                       |                       |                       |                       |
| Localised                            | All ages | 92.5 (89.8 - 94.6)    | 93.0 (90.1 - 95.0)    | 90.5 (86.0 - 93.5)    | 97.5 (89.9 - 99.4)    | 92.9 (85.7 - 96.5)        | 88.7 (84.8 - 91.6)    | 93.9 (91.5 - 95.7)    | 85.5 (75.5 - 91.7)    | 89.8 (86.5 - 92.3)    |
|                                      | 15-49    | 95.1 (88.6 - 97.9)    | 94.5 (88.7 - 97.4)    | 93.3 (77.5 - 98.1)    | 96.6 (65.2 - 99.7)    | 100.0 (100.0 - 100.0)     | 100.0 (100.0 - 100.0) | 93.2 (79.7 - 97.8)    | 69.1 (30.4 - 89.2)    | 91.2 (79.5 - 96.4)    |
|                                      | 50-64    | 94.2 (90.8 - 96.4)    | 94.0 (90.4 - 96.3)    | 95.5 (88.8 - 98.2)    | 95.1 (87.1 - 98.2)    | 95.1 (84.1 - 98.5)        | 92.3 (86.4 - 95.7)    | 96.0 (93.8 - 97.5)    | 86.8 (70.8 - 94.4)    | 95.1 (90.5 - 97.5)    |
|                                      | 65-79    | 93.8 (89.3 - 96.4)    | 92.3 (87.9 - 95.2)    | 91.3 (84.0 - 95.3)    | 96.3 (83.7 - 99.2)    | 92.3 (80.4 - 97.1)        | 90.3 (83.8 - 94.3)    | 91.3 (88.0 - 93.8)    | 92.9 (76.9 - 98.0)    | 89.1 (84.2 - 92.6)    |
|                                      | 80-99    | 85.3 (73.6 - 92.1)    | 91.1 (76.5 - 96.8)    | 78.9 (63.9 - 88.2)    | 100.0 (100.0 - 100.0) | 80.6 (33.4 - 95.8)        | 70.4 (58.0 - 79.8)    | 97.3 (59.6 - 99.9)    | 75.2 (36.1 - 92.3)    | 81.0 (69.3 - 88.6)    |
| Regional                             | All ages | 76.8 (74.2 - 79.2)    | 73.2 (70.6 - 75.7)    | 72.8 (68.9 - 76.4)    | 79.7 (74.5 - 84.0)    | 66.8 (60.2 - 72.5)        | 76.2 (73.3 - 78.8)    | 76.1 (73.8 - 78.3)    | 76.2 (67.1 - 83.1)    | 74.5 (70.9 - 77.7)    |
|                                      | 15-49    | 90.6 (84.2 - 94.5)    | 78.3 (70.1 - 84.5)    | 79.8 (67.1 - 88.0)    | 96.8 (65.8 - 99.8)    | 81.2 (54.5 - 93.1)        | 83.8 (73.0 - 90.5)    | 82.0 (73.7 - 87.9)    | 90.9 (43.6 - 98.9)    | 86.9 (75.1 - 93.3)    |
|                                      | 50-64    | 81.6 (77.6 - 84.9)    | 78.7 (74.3 - 82.3)    | 76.8 (70.4 - 82.0)    | 80.7 (72.3 - 86.7)    | 71.7 (61.9 - 79.4)        | 85.7 (81.1 - 89.2)    | 79.0 (75.2 - 82.2)    | 81.9 (64.7 - 91.3)    | 82.7 (77.3 - 87.0)    |
|                                      | 65-79    | 75.8 (71.6 - 79.4)    | 73.5 (69.6 - 77.0)    | 70.8 (64.8 - 76.0)    | 80.2 (71.6 - 86.4)    | 63.1 (54.2 - 70.8)        | 73.2 (68.8 - 77.1)    | 75.5 (71.7 - 79.0)    | 75.2 (60.6 - 85.0)    | 69.7 (64.1 - 74.5)    |
|                                      | 80-99    | 61.2 (52.4 - 68.9)    | 60.9 (52.8 - 68.0)    | 63.9 (51.5 - 73.9)    | 64.0 (46.4 - 77.1)    | 63.6 (35.9 - 81.9)        | 59.7 (50.7 - 67.6)    | 70.5 (65.2 - 75.3)    | 56.9 (31.1 - 76.2)    | 66.1 (54.8 - 75.3)    |
| Distant                              | All ages | 16.2 (14.0 - 18.5)    | 14.4 (12.2 - 16.6)    | 14.3 (11.2 - 17.8)    | 13.0 (9.0 - 17.9)     | 9.9 (6.0 - 14.8)          | 12.8 (10.4 - 15.5)    | 16.8 (14.8 - 18.9)    | 8.2 (3.4 - 15.8)      | 13.4 (10.9 - 16.2)    |
|                                      | 15-49    | 24.1 (16.8 - 32.1)    | 21.5 (14.3 - 29.7)    | 30.1 (17.1 - 44.2)    | 19.2 (7.0 - 36.0)     | 5.4 (0.3 - 23.5)          | 23.2 (13.3 - 34.7)    | 28.3 (22.1 - 34.9)    | 20.2 (3.2 - 47.6)     | 20.6 (11.4 - 31.8)    |
|                                      | 50-64    | 20.7 (16.8 - 24.9)    | 17.0 (13.3 - 21.1)    | 18.7 (12.8 - 25.5)    | 20.7 (13.2 - 29.4)    | 12.8 (6.6 - 21.0)         | 14.3 (10.1 - 19.3)    | 20.3 (16.7 - 24.1)    | *                     | 19.1 (14.2 - 24.5)    |
|                                      | 65-79    | 15.2 (11.8 - 18.9)    | 14.1 (10.5 - 18.2)    | 9.6 (6.0 - 14.1)      | 14.4 (8.6 - 21.6)     | 11.4 (5.5 - 19.6)         | 11.6 (8.1 - 15.8)     | 15.2 (11.9 - 18.8)    | 5.5 (1.6 - 12.9)      | 10.6 (7.1 - 14.9)     |
|                                      | 80-99    | 4.8 (2.1 - 9.1)       | 4.5 (2.3 - 7.9)       | 5.6 (1.9 - 12.3)      | 2.6 (0.5 - 8.0)       | *                         | 2.9 (0.8 - 7.2)       | *                     | *                     | 5.2 (1.6 - 12.1)      |
| Missing                              | All ages | 21.6 (11.0 - 34.4)    | 56.8 (51.9 - 61.4)    | 22.2 (8.1 - 40.6)     | 47.0 (34.5 - 58.4)    | 34.4 (15.7 - 54.1)        | 6.5 (0.2 - 30.2)      | 55.4 (52.9 - 57.8)    | 4.4 (0.0 - 41.9)      | 24.0 (11.6 - 38.9)    |
|                                      | 15-49    | 100.0 (100.0 - 100.0) | 66.7 (41.1 - 83.1)    | 51.4 (0.9 - 91.1)     | 92.5 (50.1 - 99.1)    | 51.8 (0.8 - 91.4)         | 100.0 (100.0 - 100.0) | 78.4 (72.7 - 83.1)    | 100.0 (100.0 - 100.0) | 100.0 (100.0 - 100.0) |
|                                      | 50-64    | 16.6 (1.0 - 49.8)     | 69.3 (57.7 - 78.3)    | 52.1 (0.7 - 91.8)     | 57.1 (28.0 - 78.2)    | 90.3 (46.8 - 98.6)        | 1.0 (0.0 - 26.0)      | 70.5 (66.2 - 74.3)    | 64.6 (2.8 - 94.8)     | 36.6 (13.6 - 60.3)    |
|                                      | 65-79    | 7.2 (1.2 - 20.9)      | 58.0 (50.0 - 65.2)    | 19.1 (2.7 - 46.9)     | 37.2 (17.5 - 57.2)    | 6.1 (0.2 - 27.6)          | 12.5 (0.7 - 42.0)     | 52.1 (47.8 - 56.2)    | 25.8 (0.8 - 68.4)     | 4.7 (0.1 - 24.3)      |
|                                      | 80-99    | *                     | 27.0 (21.3 - 32.9)    | 7.1 (0.9 - 23.0)      | 16.4 (5.1 - 33.4)     | 13.7 (0.2 - 51.9)         | 2.7 (0.2 - 13.1)      | 25.5 (21.3 - 30.0)    | 0.9 (0.0 - 15.0)      | 9.9 (2.3 - 24.4)      |

Abbreviation: NS = net survival, CI = confidence interval

All ages=Age-standardised

<sup>†</sup> Model1: Age spline with mapped SEER stage as time-dependent covariate

<sup>‡</sup> Model2: Age spline allowing separate models for each stage category

<sup>§</sup> Not possible to estimate

**Supplementary Table 19A.** Age-standardised and age-specific one-year net survival (%) by stage at diagnosis (without imputation) for individual registries in Canada for rectal cancer patients diagnosed during 2010-2014

| Stage                                |          | Alberta               | British Columbia      | Manitoba              | New Brunswick         | Newfoundland and Labrador | Nova Scotia           | Ontario               | Prince Edward Island  | Saskatchewan          |
|--------------------------------------|----------|-----------------------|-----------------------|-----------------------|-----------------------|---------------------------|-----------------------|-----------------------|-----------------------|-----------------------|
|                                      |          | 1-year NS (95% CI)        | 1-year NS (95% CI)    | 1-year NS (95% CI)    | 1-year NS (95% CI)    | 1-year NS (95% CI)    |
| All patients <sup>‡</sup>            | All ages | 86.3 (84.4 - 88.0)    | 87.7 (86.2 - 89.0)    | 84.5 (81.4 - 87.1)    | 85.3 (81.3 - 88.5)    | 86.3 (81.9 - 89.7)        | 81.6 (78.1 - 84.7)    | 87.0 (86.0 - 88.0)    | 90.3 (79.6 - 95.6)    | 84.7 (81.4 - 87.5)    |
|                                      | 15-49    | 94.0 (89.5 - 96.6)    | 93.9 (90.1 - 96.2)    | 92.8 (84.4 - 96.8)    | 97.9 (83.6 - 99.7)    | 91.4 (75.2 - 97.2)        | 86.4 (74.5 - 93.0)    | 96.2 (94.3 - 97.5)    | 90.2 (46.8 - 98.6)    | 92.3 (80.4 - 97.1)    |
|                                      | 50-64    | 91.0 (88.5 - 92.9)    | 91.6 (89.5 - 93.3)    | 88.5 (83.8 - 91.9)    | 91.5 (85.6 - 95.1)    | 94.7 (89.3 - 97.5)        | 89.3 (84.5 - 92.7)    | 91.6 (90.3 - 92.8)    | 89.3 (68.6 - 96.6)    | 92.4 (87.9 - 95.3)    |
|                                      | 65-79    | 86.9 (83.7 - 89.5)    | 88.6 (86.4 - 90.5)    | 83.9 (78.7 - 87.9)    | 83.3 (77.2 - 87.9)    | 86.5 (79.7 - 91.1)        | 82.4 (77.4 - 86.5)    | 87.4 (85.7 - 88.8)    | 96.9 (73.3 - 99.7)    | 85.2 (79.8 - 89.2)    |
|                                      | 80-99    | 71.8 (65.0 - 77.5)    | 74.8 (70.0 - 78.9)    | 74.7 (64.6 - 82.3)    | 70.5 (55.5 - 81.2)    | 64.0 (46.9 - 76.8)        | 66.8 (55.2 - 76.0)    | 73.4 (70.0 - 76.4)    | 81.0 (36.3 - 95.7)    | 65.0 (54.3 - 73.9)    |
| <b>TNM Stage<sup>§</sup></b>         |          |                       |                       |                       |                       |                           |                       |                       |                       |                       |
| Stage I                              | All ages | 99.4 (88.9 - 100.0)   | 75.5 (65.6 - 82.9)    | 57.7 (52.9 - 62.2)    | 92.4 (87.4 - 95.5)    | 97.5 (85.5 - 99.6)        | 97.0 (84.0 - 99.5)    | 78.1 (56.6 - 89.8)    | 45.7 (38.3 - 52.8)    | 93.1 (91.5 - 94.5)    |
|                                      | 15-49    | 100.0 (100.0 - 100.0) | 87.1 (56.6 - 96.7)    | 72.3 (58.8 - 82.0)    | 97.6 (81.9 - 99.7)    | 100.0 (100.0 - 100.0)     | 100.0 (100.0 - 100.0) | 100.0 (100.0 - 100.0) | 60.6 (40.3 - 75.9)    | 97.0 (93.6 - 98.6)    |
|                                      | 50-64    | 98.8 (93.8 - 99.8)    | 84.1 (65.2 - 93.2)    | 67.4 (59.3 - 74.3)    | 97.9 (90.8 - 99.5)    | 97.5 (73.8 - 99.8)        | 95.7 (73.8 - 99.8)    | 100.0 (100.0 - 100.0) | 100.0 (100.0 - 100.0) | 95.5 (93.4 - 97.0)    |
|                                      | 65-79    | 98.2 (89.6 - 99.7)    | 74.4 (52.1 - 87.5)    | 55.7 (48.0 - 62.7)    | 91.6 (83.4 - 95.9)    | 96.8 (79.1 - 99.6)        | 95.6 (64.0 - 99.6)    | 81.3 (39.5 - 95.5)    | 45.7 (34.7 - 56.1)    | 93.1 (90.4 - 95.1)    |
|                                      | 80-99    | 100.0 (100.0 - 100.0) | 48.1 (28.8 - 65.1)    | 35.1 (24.0 - 46.3)    | 81.1 (59.1 - 92.0)    | 95.1 (8.6 - 99.9)         | 91.9 (17.3 - 99.6)    | 24.2 (1.0 - 64.6)     | 16.0 (4.9 - 33.0)     | 87.3 (81.0 - 91.6)    |
| Stage II                             | All ages | 93.5 (89.2 - 96.1)    | 97.4 (94.5 - 98.8)    | 87.6 (84.2 - 90.4)    | 53.8 (45.3 - 61.6)    | 90.6 (81.5 - 95.4)        | 94.3 (83.5 - 98.1)    | 93.9 (89.4 - 96.5)    | 75.3 (61.2 - 84.9)    | 60.0 (56.5 - 63.3)    |
|                                      | 15-49    | 91.3 (88.3 - 97.8)    | 100.0 (100.0 - 100.0) | 100.0 (100.0 - 100.0) | 78.0 (51.3 - 91.2)    | 100.0 (100.0 - 100.0)     | 100.0 (100.0 - 100.0) | 100.0 (100.0 - 100.0) | 100.0 (100.0 - 100.0) | 81.5 (71.5 - 88.3)    |
|                                      | 50-64    | 98.0 (91.8 - 99.5)    | 97.4 (91.8 - 99.2)    | 94.3 (88.7 - 97.2)    | 59.0 (45.9 - 70.0)    | 98.8 (79.4 - 99.9)        | 97.5 (73.8 - 99.8)    | 100.0 (100.0 - 100.0) | 99.5 (40.0 - 100.0)   | 88.1 (36.8 - 98.4)    |
|                                      | 65-79    | 95.4 (87.0 - 98.4)    | 97.8 (91.9 - 99.4)    | 87.6 (80.9 - 92.0)    | 49.6 (36.3 - 61.5)    | 90.0 (75.3 - 96.2)        | 91.6 (72.5 - 97.6)    | 93.5 (86.0 - 97.0)    | 64.9 (38.4 - 82.3)    | 59.0 (53.2 - 64.4)    |
|                                      | 80-99    | 80.1 (63.3 - 89.8)    | 93.6 (78.7 - 98.2)    | 71.4 (61.6 - 79.1)    | 37.5 (15.0 - 60.3)    | 54.1 (15.2 - 81.9)        | 81.5 (23.5 - 97.1)    | 83.4 (67.1 - 92.1)    | 45.0 (19.0 - 68.1)    | 33.2 (25.8 - 40.8)    |
| Stage III                            | All ages | 94.7 (91.9 - 96.5)    | 96.0 (93.3 - 97.7)    | 95.6 (89.7 - 98.2)    | 69.7 (48.0 - 83.7)    | 57.8 (45.8 - 68.0)        | 94.2 (84.2 - 97.9)    | 91.5 (85.8 - 94.9)    | 96.8 (95.2 - 97.8)    | 78.2 (74.4 - 81.5)    |
|                                      | 15-49    | 98.8 (89.3 - 99.9)    | 100.0 (100.0 - 100.0) | 100.0 (100.0 - 100.0) | 24.2 (0.0 - 81.9)     | 89.1 (42.9 - 98.4)        | 100.0 (100.0 - 100.0) | 100.0 (100.0 - 100.0) | 100.0 (100.0 - 100.0) | 99.1 (91.9 - 99.9)    |
|                                      | 50-64    | 95.5 (92.0 - 97.5)    | 96.2 (91.8 - 98.3)    | 100.0 (100.0 - 100.0) | 72.0 (25.7 - 92.4)    | 59.6 (37.8 - 75.9)        | 95.4 (84.1 - 98.7)    | 95.1 (85.6 - 98.4)    | 96.6 (96.5 - 99.4)    | 90.8 (86.3 - 93.9)    |
|                                      | 65-79    | 95.0 (90.4 - 97.5)    | 97.4 (92.6 - 99.1)    | 95.0 (82.7 - 98.7)    | 92.3 (35.5 - 99.4)    | 60.9 (43.8 - 74.3)        | 93.4 (76.6 - 98.3)    | 89.2 (80.6 - 94.1)    | 97.0 (94.5 - 98.3)    | 77.8 (70.4 - 83.5)    |
|                                      | 80-99    | 88.8 (73.9 - 95.5)    | 89.6 (77.4 - 95.4)    | 85.0 (61.4 - 94.7)    | 47.8 (16.0 - 74.3)    | 32.6 (8.5 - 60.1)         | 87.7 (15.8 - 99.1)    | 87.0 (58.2 - 96.5)    | 90.9 (83.9 - 94.9)    | 52.5 (43.7 - 60.5)    |
| Stage IV                             | All ages | 54.7 (48.8 - 60.2)    | 94.4 (92.1 - 96.1)    | 93.8 (85.2 - 97.5)    | 95.1 (87.1 - 98.2)    | 72.0 (55.9 - 83.1)        | 54.0 (41.2 - 65.1)    | 92.4 (88.2 - 95.2)    | 92.4 (90.2 - 94.2)    | 96.5 (71.2 - 99.6)    |
|                                      | 15-49    | 82.5 (66.7 - 91.3)    | 100.0 (100.0 - 100.0) | 100.0 (100.0 - 100.0) | 100.0 (100.0 - 100.0) | 100.0 (100.0 - 100.0)     | 57.5 (17.5 - 83.9)    | 100.0 (100.0 - 100.0) | 100.0 (100.0 - 100.0) | 100.0 (100.0 - 100.0) |
|                                      | 50-64    | 66.9 (57.9 - 74.4)    | 97.4 (94.5 - 98.7)    | 97.2 (72.2 - 99.7)    | 97.7 (75.0 - 99.8)    | 91.4 (48.8 - 98.9)        | 79.0 (58.3 - 90.2)    | 97.2 (92.0 - 99.1)    | 94.4 (90.9 - 96.5)    | 100.0 (100.0 - 100.0) |
|                                      | 65-79    | 47.0 (37.0 - 56.4)    | 96.0 (92.5 - 97.9)    | 93.5 (73.7 - 98.6)    | 91.4 (77.9 - 96.8)    | 51.2 (26.4 - 71.4)        | 51.2 (26.4 - 71.4)    | 89.6 (82.9 - 93.8)    | 90.7 (86.7 - 93.5)    | 96.4 (39.2 - 99.9)    |
|                                      | 80-99    | 34.3 (22.2 - 46.7)    | 80.3 (69.4 - 87.7)    | 86.7 (58.7 - 96.2)    | 95.6 (6.4 - 99.9)     | 60.8 (29.2 - 81.7)        | *                     | 90.0 (66.0 - 97.4)    | 87.4 (79.3 - 92.5)    | 81.8 (3.8 - 98.8)     |
| Missing                              | All ages | 75.5 (65.6 - 82.9)    | 87.6 (84.2 - 90.4)    | 69.7 (48.0 - 83.7)    | 72.0 (55.9 - 83.1)    | 78.1 (56.6 - 89.8)        | 75.3 (61.2 - 84.9)    | 78.2 (74.4 - 81.5)    | 56.9 (12.6 - 85.8)    | 72.9 (58.7 - 82.9)    |
|                                      | 15-49    | 87.1 (56.6 - 96.7)    | 100.0 (100.0 - 100.0) | 24.2 (0.0 - 81.9)     | 100.0 (100.0 - 100.0) | 100.0 (100.0 - 100.0)     | 100.0 (100.0 - 100.0) | 99.1 (91.9 - 99.9)    | 100.0 (100.0 - 100.0) | 100.0 (100.0 - 100.0) |
|                                      | 50-64    | 84.1 (65.2 - 93.2)    | 94.3 (88.7 - 97.2)    | 72.0 (25.7 - 92.4)    | 91.4 (48.8 - 98.9)    | 100.0 (100.0 - 100.0)     | 88.1 (36.8 - 98.4)    | 90.8 (86.3 - 93.9)    | *                     | 82.9 (54.6 - 94.3)    |
|                                      | 65-79    | 74.4 (52.1 - 87.5)    | 87.6 (80.9 - 92.0)    | 92.3 (35.5 - 99.4)    | 51.2 (26.4 - 71.4)    | 81.3 (39.5 - 95.5)        | 64.9 (38.4 - 82.3)    | 77.8 (70.4 - 83.5)    | 100.0 (100.0 - 100.0) | 61.6 (34.9 - 80.0)    |
|                                      | 80-99    | 48.1 (28.8 - 65.1)    | 71.4 (61.6 - 79.1)    | 47.8 (16.0 - 74.3)    | 60.8 (29.2 - 81.7)    | 24.2 (1.0 - 64.6)         | 45.0 (19.0 - 68.1)    | 52.5 (43.7 - 60.5)    | 48.7 (3.4 - 85.8)     | 52.2 (22.2 - 75.5)    |
| <b>Mapped SEER stage<sup>¶</sup></b> |          |                       |                       |                       |                       |                           |                       |                       |                       |                       |
| Localised                            | All ages | 98.5 (95.1 - 99.6)    | 98.0 (96.2 - 99.0)    | 96.0 (93.1 - 97.7)    | 95.5 (90.0 - 98.0)    | 98.4 (86.9 - 99.8)        | 93.4 (89.4 - 95.9)    | 96.2 (95.0 - 97.2)    | 93.7 (82.8 - 97.8)    | 94.1 (90.5 - 96.4)    |
|                                      | 15-49    | 98.8 (89.4 - 99.9)    | 100.0 (100.0 - 100.0) | 100.0 (100.0 - 100.0) | 100.0 (100.0 - 100.0) | 100.0 (100.0 - 100.0)     | 100.0 (100.0 - 100.0) | 100.0 (100.0 - 100.0) | 100.0 (100.0 - 100.0) | 96.7 (76.7 - 99.6)    |
|                                      | 50-64    | 99.3 (94.6 - 99.9)    | 98.5 (95.6 - 99.5)    | 99.4 (90.4 - 100.0)   | 98.8 (77.7 - 99.9)    | 100.0 (100.0 - 100.0)     | 98.8 (89.1 - 99.9)    | 97.8 (96.2 - 98.8)    | 92.9 (71.7 - 98.4)    | 98.1 (91.5 - 99.6)    |
|                                      | 65-79    | 98.7 (90.7 - 99.8)    | 98.0 (94.6 - 99.3)    | 95.7 (90.3 - 98.1)    | 90.2 (80.7 - 95.2)    | 96.9 (77.3 - 99.6)        | 94.3 (87.8 - 97.4)    | 96.1 (94.0 - 97.5)    | 95.9 (70.0 - 99.5)    | 97.1 (90.2 - 99.1)    |
|                                      | 80-99    | 96.3 (72.6 - 99.6)    | 95.3 (85.8 - 98.5)    | 88.2 (75.8 - 94.4)    | 98.5 (0.0 - 100.0)    | 97.4 (0.0 - 100.0)        | 80.4 (65.9 - 89.2)    | 91.2 (85.6 - 94.7)    | 81.6 (23.3 - 97.2)    | 77.1 (62.1 - 88.8)    |
| Regional                             | All ages | 93.1 (90.6 - 94.9)    | 93.8 (91.9 - 95.3)    | 94.1 (91.5 - 95.9)    | 90.8 (83.2 - 95.1)    | 92.8 (84.7 - 96.7)        | 91.6 (88.3 - 94.0)    | 92.9 (91.4 - 94.1)    | 91.9 (76.1 - 97.4)    | 92.5 (89.0 - 95.0)    |
|                                      | 15-49    | 97.6 (89.8 - 99.5)    | 100.0 (100.0 - 100.0) | 97.7 (90.0 - 99.5)    | 100.0 (100.0 - 100.0) | 100.0 (100.0 - 100.0)     | 100.0 (100.0 - 100.0) | 97.7 (94.6 - 99.0)    | 100.0 (100.0 - 100.0) | 100.0 (100.0 - 100.0) |
|                                      | 50-64    | 95.8 (92.8 - 97.6)    | 96.3 (93.8 - 97.8)    | 97.8 (94.6 - 99.1)    | 96.0 (86.0 - 98.9)    | 97.5 (86.2 - 99.6)        | 96.1 (91.7 - 98.2)    | 94.9 (93.0 - 96.4)    | 100.0 (100.0 - 100.0) | 97.0 (91.6 - 99.0)    |
|                                      | 65-79    | 93.1 (88.9 - 95.8)    | 95.4 (92.5 - 97.2)    | 94.4 (90.0 - 96.9)    | 92.4 (81.3 - 97.1)    | 92.7 (79.7 - 97.5)        | 88.9 (83.6 - 92.6)    | 92.6 (90.3 - 94.5)    | 93.8 (67.8 - 98.9)    | 93.3 (87.3 - 96.6)    |
|                                      | 80-99    | 84.2 (73.3 - 91.0)    | 81.4 (73.1 - 87.3)    | 84.7 (74.0 - 91.2)    | 57.2 (21.7 - 81.5)    | 72.0 (28.7 - 91.7)        | 87.5 (71.6 - 94.9)    | 87.5 (82.1 - 91.4)    | 70.4 (25.0 - 91.5)    | 78.1 (64.2 - 87.1)    |
| Distant                              | All ages | 55.7 (50.0 - 61.0)    | 58.7 (54.0 - 63.1)    | 55.4 (49.4 - 61.0)    | 58.8 (46.8 - 69.0)    | 52.8 (40.2 - 63.9)        | 47.2 (39.9 - 54.1)    | 61.3 (58.0 - 64.5)    | 55.7 (33.0 - 73.4)    | 58.6 (51.3 - 65.2)    |
|                                      | 15-49    | 78.4 (62.4 - 88.2)    | 73.2 (60.1 - 82.7)    | 70.8 (53.5 - 82.7)    | 89.1 (42.9 - 98.4)    | 57.5 (17.5 - 83.9)        | 60.6 (40.3 - 75.9)    | 83.6 (74.9 - 89.5)    | 83.5 (27.2 - 97.5)    | 76.4 (54.7 - 88.7)    |
|                                      | 50-64    | 68.0 (59.4 - 75.1)    | 69.0 (61.3 - 75.5)    | 65.6 (56.6 - 73.1)    | 62.7 (41.5 - 78.0)    | 76.9 (56.9 - 88.5)        | 61.2 (48.4 - 71.8)    | 71.6 (66.2 - 76.2)    | 57.6 (17.2 - 84.1)    | 74.4 (63.2 - 82.6)    |
|                                      | 65-79    | 48.6 (38.7 - 57.8)    | 56.2 (48.7 - 63.1)    | 51.2 (41.6 - 60.0)    | 61.9 (44.9 - 75.0)    | 55.4 (37.0 - 70.3)        | 47.4 (36.8 - 57.2)    | 60.8 (55.1 - 65.9)    | 51.2 (15.3 - 78.8)    | 51.3 (38.8 - 62.5)    |
|                                      | 80-99    | 35.6 (23.7 - 47.7)    | 35.5 (24.5 - 46.7)    | 37.6 (21.9 - 53.2)    | 32.6 (8.5 - 60.1)     | *                         | 19.3 (6.7 - 36.6)     | 33.8 (26.7 - 41.0)    | 42.4 (4.9 - 78.3)     | 37.3 (22.2 - 52.4)    |
| Missing                              | All ages | 46.8 (23.4 - 67.3)    | 77.2 (70.0 - 82.8)    | 51.4 (32.3 - 67.6)    | 74.0 (54.4 - 86.2)    | 43.4 (4.8 - 79.5)         | 67.7 (43.6 - 83.2)    | 76.3 (72.1 - 79.9)    | 55.4 (0.5 - 93.7)     | 64.1 (37.2 - 81.9)    |
|                                      | 15-49    | 100.0 (100.0 - 100.0) | 100.0 (100.0 - 100.0) | 100.0 (100.0 - 100.0) | 100.0 (100.0 - 100.0) | 100.0 (100.0 - 100.0)     | 100.0 (100.0 - 100.0) | 98.8 (90.1 - 99.9)    | *                     | 100.0 (100.0 - 100.0) |
|                                      | 50-64    | 40.3 (8.5 - 71.6)     | 86.5 (71.8 - 93.9)    | 57.9 (17.4 - 84.3)    | 100.0 (100.0 - 100.0) | 100.0 (100.0 - 100.0)     | 100.0 (100.0 - 100.0) | 90.8 (85.5 - 94.8)    | *                     | 67.6 (5.5 - 94.8)     |
|                                      | 65-79    | 35.0 (1.1 - 78.3)     | 74.6 (59.1 - 84.9)    | 36.9 (13.8 - 60.6)    | 51.7 (21.3 - 75.4)    | 35.1 (1.1 - 78.3)         | 61.9 (25.4 - 84.6)    | 73.7 (65.5 - 80.2)    | *                     | 52.9 (20.6 - 77.4)    |
|                                      | 80-99    | 37.9 (16.2 - 59.6)    | 54.7 (41.6 - 66.1)    | 51.9 (29.0 - 70.6)    | 51.1 (20.1 - 75.5)    | *                         | 37.5 (6.5 - 70.4)     | 50.8 (41.6 - 59.3)    | 55.4 (0.5 - 93.7)     | 64.9 (25.9 - 87.1)    |

Abbreviation: NS = net survival, CI = confidence interval

All ages=Age-standardised

<sup>‡</sup> Model1: Age spline with mapped SEER stage as time-dependent covariate

<sup>§</sup> Model2: Age spline allowing separate models for each stage category

\* Not possible to estimate

**Supplementary Table 19B.** Age-standardised and age-specific five-year net survival (%) by stage at diagnosis (without imputation) for individual registries in Canada for rectal cancer patients diagnosed during 2010-2014

| Stage                                |          | Alberta               | British Columbia      | Manitoba              | New Brunswick         | Newfoundland and Labrador | Nova Scotia           | Ontario               | Prince Edward Island  | Saskatchewan          |
|--------------------------------------|----------|-----------------------|-----------------------|-----------------------|-----------------------|---------------------------|-----------------------|-----------------------|-----------------------|-----------------------|
|                                      |          | 5-year NS (95% CI)        | 5-year NS (95% CI)    | 5-year NS (95% CI)    | 5-year NS (95% CI)    | 5-year NS (95% CI)    |
| All patients <sup>1</sup>            | All ages | 64.7 (61.8 - 67.4)    | 67.3 (65.1 - 69.3)    | 65.0 (60.8 - 68.9)    | 67.7 (62.3 - 72.4)    | 71.9 (65.9 - 77.1)        | 60.0 (55.2 - 64.5)    | 68.6 (67.0 - 70.1)    | 65.7 (51.9 - 76.4)    | 65.8 (61.1 - 70.1)    |
|                                      | 15-49    | 75.7 (68.9 - 81.3)    | 71.2 (64.9 - 76.6)    | 71.3 (60.4 - 79.7)    | 75.7 (61.2 - 85.4)    | 73.1 (57.6 - 83.7)        | 61.2 (48.3 - 71.8)    | 80.2 (76.7 - 83.3)    | 41.4 (11.9 - 69.4)    | 72.7 (59.3 - 82.3)    |
|                                      | 50-64    | 70.5 (66.7 - 73.9)    | 71.8 (68.7 - 74.7)    | 66.4 (60.5 - 71.6)    | 78.1 (70.6 - 83.9)    | 77.8 (70.0 - 83.8)        | 72.0 (65.6 - 77.4)    | 76.3 (74.2 - 78.3)    | 70.3 (49.5 - 83.8)    | 79.0 (72.7 - 84.1)    |
|                                      | 65-79    | 68.7 (64.2 - 72.8)    | 69.8 (66.5 - 72.9)    | 64.0 (57.4 - 69.9)    | 63.4 (55.5 - 70.4)    | 73.5 (64.0 - 80.8)        | 63.7 (57.3 - 69.4)    | 68.6 (66.1 - 70.9)    | 77.7 (52.0 - 90.7)    | 68.5 (61.3 - 74.7)    |
|                                      | 80-99    | 39.2 (31.2 - 47.2)    | 50.9 (44.1 - 57.3)    | 63.0 (46.9 - 75.4)    | 52.7 (34.1 - 68.3)    | 59.0 (29.1 - 79.7)        | 36.6 (23.3 - 50.1)    | 49.2 (44.2 - 54.0)    | 51.5 (9.1 - 83.2)     | 36.3 (25.0 - 47.6)    |
| <b>TNM Stage<sup>2</sup></b>         |          |                       |                       |                       |                       |                           |                       |                       |                       |                       |
| Stage I                              | All ages | 98.1 (12.0 - 100.0)   | 94.8 (90.2 - 97.3)    | 72.9 (58.7 - 82.9)    | 13.5 (9.9 - 17.8)     | 73.7 (68.1 - 78.5)        | 71.8 (60.8 - 80.2)    | 91.3 (78.7 - 96.6)    | 49.1 (32.9 - 63.5)    | 8.5 (3.1 - 17.2)      |
|                                      | 15-49    | 100.0 (100.0 - 100.0) | 100.0 (100.0 - 100.0) | 100.0 (100.0 - 100.0) | 27.2 (14.6 - 41.4)    | 82.7 (68.5 - 90.9)        | 54.9 (18.7 - 80.6)    | 100.0 (100.0 - 100.0) | 100.0 (100.0 - 100.0) | 10.9 (1.2 - 33.2)     |
|                                      | 50-64    | 100.0 (100.0 - 100.0) | 98.1 (88.0 - 99.7)    | 82.9 (54.6 - 94.3)    | 15.8 (10.0 - 22.8)    | 74.1 (66.6 - 80.2)        | 18.9 (12.1 - 26.8)    | 83.5 (67.4 - 92.1)    | 82.0 (61.7 - 92.2)    | 13.8 (3.3 - 31.7)     |
|                                      | 65-79    | 100.0 (100.0 - 100.0) | 99.4 (11.3 - 100.0)   | 61.6 (34.9 - 80.0)    | 12.9 (7.1 - 20.5)     | 76.1 (67.1 - 83.0)        | 73.9 (55.7 - 85.6)    | 92.3 (66.8 - 98.4)    | 18.3 (5.4 - 37.2)     | 7.1 (0.9 - 22.4)      |
|                                      | 80-99    | 81.0 (4.8 - 98.5)     | 72.9 (53.9 - 85.1)    | 52.2 (22.2 - 75.5)    | *                     | 60.4 (42.9 - 74.1)        | 58.5 (28.7 - 79.4)    | 88.2 (1.3 - 99.6)     | 25.7 (2.5 - 60.5)     | 3.1 (0.0 - 34.3)      |
| Stage II                             | All ages | 90.6 (65.5 - 97.7)    | 91.4 (86.1 - 94.7)    | 94.2 (86.3 - 97.6)    | 55.7 (43.5 - 66.4)    | 14.3 (10.3 - 19.0)        | 73.8 (66.2 - 80.0)    | 88.6 (72.1 - 95.6)    | 99.0 (0.0 - 100.0)    | 76.9 (50.3 - 90.4)    |
|                                      | 15-49    | 100.0 (100.0 - 100.0) | 92.4 (55.3 - 99.0)    | 97.1 (68.9 - 99.8)    | 82.8 (53.6 - 94.4)    | 23.1 (10.2 - 39.1)        | 78.6 (60.5 - 89.1)    | 82.8 (43.2 - 95.8)    | 100.0 (100.0 - 100.0) | 100.0 (100.0 - 100.0) |
|                                      | 50-64    | 100.0 (100.0 - 100.0) | 97.2 (85.5 - 99.5)    | 95.6 (88.6 - 98.4)    | 77.1 (56.8 - 88.7)    | 18.9 (12.1 - 26.8)        | 74.9 (65.1 - 82.3)    | 95.1 (72.6 - 99.2)    | 100.0 (100.0 - 100.0) | 100.0 (100.0 - 100.0) |
|                                      | 65-79    | 85.0 (46.4 - 96.6)    | 92.4 (82.9 - 96.7)    | 96.7 (77.8 - 99.5)    | 48.1 (27.9 - 65.7)    | 12.9 (7.1 - 20.6)         | 72.0 (60.4 - 80.7)    | 86.9 (64.8 - 95.5)    | 100.0 (100.0 - 100.0) | 70.9 (33.1 - 89.9)    |
|                                      | 80-99    | 72.1 (2.7 - 97.1)     | 75.9 (57.4 - 87.2)    | 84.9 (51.5 - 96.1)    | 22.8 (5.4 - 47.3)     | *                         | 77.3 (34.4 - 94.0)    | 91.5 (0.0 - 99.9)     | 98.5 (0.0 - 100.0)    | 30.0 (0.5 - 76.2)     |
| Stage III                            | All ages | 59.3 (33.4 - 78.0)    | 94.5 (90.3 - 96.9)    | 80.0 (73.4 - 85.1)    | 94.6 (87.4 - 97.7)    | 68.0 (63.8 - 71.9)        | 15.1 (9.5 - 22.0)     | 72.1 (60.4 - 80.9)    | 81.7 (67.7 - 90.1)    | 89.6 (81.5 - 94.2)    |
|                                      | 15-49    | 80.2 (20.4 - 97.0)    | 100.0 (100.0 - 100.0) | 83.1 (62.2 - 93.1)    | 96.6 (65.2 - 99.7)    | 82.6 (71.5 - 89.8)        | *                     | 61.8 (33.2 - 81.0)    | 100.0 (100.0 - 100.0) | 92.9 (50.7 - 99.2)    |
|                                      | 50-64    | 39.3 (5.2 - 74.4)     | 98.0 (91.5 - 99.5)    | 87.9 (79.3 - 93.1)    | 94.1 (84.1 - 97.9)    | 79.6 (73.6 - 84.4)        | 14.7 (7.2 - 24.7)     | 91.3 (77.2 - 96.8)    | 81.5 (59.3 - 92.3)    | 100.0 (100.0 - 100.0) |
|                                      | 65-79    | 68.3 (18.8 - 91.6)    | 93.3 (85.8 - 96.9)    | 86.8 (75.5 - 93.1)    | 90.2 (77.6 - 95.9)    | 71.3 (64.0 - 77.3)        | 15.1 (6.3 - 27.3)     | 64.4 (46.0 - 77.9)    | 85.6 (56.1 - 95.9)    | 82.9 (71.4 - 90.0)    |
|                                      | 80-99    | 42.4 (4.9 - 78.3)     | 88.0 (69.1 - 95.7)    | 42.9 (25.2 - 59.5)    | 100.0 (100.0 - 100.0) | 38.5 (29.1 - 47.9)        | *                     | 52.4 (6.6 - 85.7)     | 42.7 (2.3 - 82.5)     | 81.8 (46.7 - 94.9)    |
| Stage IV                             | All ages | 56.9 (12.6 - 85.8)    | 57.8 (50.3 - 64.6)    | 67.2 (61.7 - 72.1)    | 83.5 (77.5 - 88.0)    | 84.1 (74.3 - 90.4)        | 54.3 (33.4 - 71.2)    | 14.8 (8.3 - 23.1)     | 67.5 (54.1 - 77.8)    | 70.6 (61.1 - 78.1)    |
|                                      | 15-49    | 100.0 (100.0 - 100.0) | 75.4 (53.2 - 88.2)    | 85.0 (72.9 - 92.0)    | 83.9 (67.1 - 92.6)    | 100.0 (100.0 - 100.0)     | 24.4 (0.0 - 82.2)     | 32.7 (5.2 - 65.6)     | 77.8 (49.4 - 91.4)    | 77.5 (49.0 - 91.3)    |
|                                      | 50-64    | *                     | 73.7 (61.9 - 82.3)    | 73.4 (67.2 - 78.6)    | 86.2 (78.3 - 91.3)    | 88.7 (75.1 - 95.1)        | 61.0 (22.5 - 85.0)    | 15.6 (5.5 - 30.4)     | 75.0 (58.9 - 85.5)    | 82.2 (70.5 - 89.7)    |
|                                      | 65-79    | 100.0 (100.0 - 100.0) | 51.4 (38.5 - 62.9)    | 69.4 (61.3 - 76.1)    | 87.5 (79.6 - 92.4)    | 83.1 (67.0 - 91.8)        | 56.8 (21.1 - 81.4)    | 16.5 (7.0 - 29.5)     | 68.2 (47.5 - 82.1)    | 73.3 (61.4 - 82.0)    |
|                                      | 80-99    | 48.7 (3.4 - 85.8)     | 36.5 (21.2 - 51.9)    | 39.5 (22.2 - 56.3)    | 69.0 (45.9 - 83.8)    | 67.3 (30.7 - 87.6)        | 59.8 (6.5 - 90.8)     | *                     | 51.3 (4.6 - 86.5)     | 48.7 (16.2 - 75.2)    |
| Missing                              | All ages | 55.7 (43.5 - 66.4)    | 68.0 (63.8 - 71.9)    | 54.3 (33.4 - 71.2)    | 49.1 (32.9 - 63.5)    | 76.9 (50.3 - 90.4)        | 61.9 (43.0 - 76.1)    | 58.3 (54.4 - 62.1)    | 28.1 (3.5 - 61.8)     | 51.6 (37.2 - 64.2)    |
|                                      | 15-49    | 82.8 (53.6 - 94.4)    | 82.6 (71.5 - 89.8)    | 24.4 (0.0 - 82.2)     | 100.0 (100.0 - 100.0) | 100.0 (100.0 - 100.0)     | 100.0 (100.0 - 100.0) | 86.9 (80.5 - 91.3)    | *                     | 91.8 (47.0 - 99.0)    |
|                                      | 50-64    | 77.1 (56.8 - 88.7)    | 79.6 (73.6 - 84.4)    | 61.0 (22.5 - 85.0)    | 86.4 (43.9 - 97.4)    | 100.0 (100.0 - 100.0)     | 81.3 (40.1 - 95.4)    | 78.0 (72.8 - 82.3)    | 13.8 (0.0 - 76.1)     | 79.7 (49.3 - 93.0)    |
|                                      | 65-79    | 48.1 (27.9 - 65.7)    | 71.3 (64.0 - 77.3)    | 56.8 (21.1 - 81.4)    | 18.3 (5.4 - 37.2)     | 70.9 (33.1 - 89.9)        | 49.2 (24.2 - 70.1)    | 55.4 (48.3 - 61.9)    | 38.3 (1.0 - 82.0)     | 38.6 (17.0 - 59.9)    |
|                                      | 80-99    | 22.8 (5.4 - 47.3)     | 38.5 (29.1 - 47.9)    | 59.8 (6.5 - 90.8)     | 25.7 (2.5 - 60.5)     | 30.0 (0.5 - 76.2)         | 19.2 (0.7 - 57.4)     | 24.7 (18.0 - 32.0)    | 48.0 (0.9 - 89.2)     | 10.5 (1.3 - 30.7)     |
| <b>Mapped SEER stage<sup>3</sup></b> |          |                       |                       |                       |                       |                           |                       |                       |                       |                       |
| Localised                            | All ages | 89.4 (83.8 - 93.2)    | 89.8 (84.2 - 93.5)    | 87.9 (82.4 - 91.8)    | 91.8 (82.3 - 96.3)    | 97.8 (57.5 - 99.9)        | 87.6 (80.3 - 92.3)    | 87.4 (81.5 - 91.6)    | 97.2 (43.6 - 99.9)    | 84.7 (78.5 - 89.3)    |
|                                      | 15-49    | 96.1 (85.2 - 99.0)    | 93.6 (80.2 - 98.0)    | 100.0 (100.0 - 100.0) | 100.0 (100.0 - 100.0) | 100.0 (100.0 - 100.0)     | 91.4 (66.1 - 98.1)    | 96.1 (89.1 - 98.6)    | 80.9 (19.2 - 97.3)    | 88.9 (70.6 - 96.1)    |
|                                      | 50-64    | 93.5 (88.0 - 96.6)    | 94.5 (88.7 - 97.4)    | 90.6 (83.7 - 94.7)    | 89.1 (75.8 - 95.3)    | 92.0 (72.7 - 97.8)        | 99.0 (46.5 - 100.0)   | 96.2 (92.7 - 98.0)    | 91.8 (65.3 - 98.3)    | 94.8 (86.0 - 98.1)    |
|                                      | 65-79    | 95.4 (85.1 - 98.6)    | 89.9 (82.1 - 94.4)    | 85.5 (76.5 - 91.2)    | 91.6 (74.8 - 97.4)    | 100.0 (100.0 - 100.0)     | 83.7 (73.4 - 90.3)    | 88.6 (81.4 - 93.2)    | 98.1 (0.0 - 100.0)    | 88.5 (78.1 - 94.1)    |
|                                      | 80-99    | 66.3 (47.4 - 79.7)    | 77.3 (49.7 - 90.9)    | 79.7 (55.4 - 91.6)    | 85.6 (22.1 - 98.4)    | 100.0 (100.0 - 100.0)     | 75.2 (45.3 - 90.2)    | 62.8 (34.1 - 81.8)    | 100.0 (100.0 - 100.0) | 57.6 (38.2 - 72.9)    |
| Regional                             | All ages | 70.0 (65.6 - 73.9)    | 75.2 (70.9 - 78.9)    | 72.2 (67.6 - 76.4)    | 73.1 (62.8 - 81.0)    | 66.6 (55.4 - 75.7)        | 68.8 (63.2 - 73.7)    | 74.3 (69.9 - 78.2)    | 66.0 (48.9 - 78.6)    | 73.9 (67.9 - 79.0)    |
|                                      | 15-49    | 84.8 (74.4 - 91.2)    | 80.9 (68.8 - 88.7)    | 73.2 (60.9 - 82.2)    | 60.0 (35.2 - 77.8)    | 83.6 (54.9 - 94.8)        | 75.7 (60.6 - 85.7)    | 86.3 (80.1 - 90.7)    | 100.0 (100.0 - 100.0) | 89.4 (71.6 - 96.3)    |
|                                      | 50-64    | 77.4 (72.1 - 81.8)    | 76.4 (70.4 - 81.4)    | 75.3 (69.1 - 80.4)    | 91.4 (79.3 - 96.6)    | 76.9 (62.8 - 86.3)        | 75.4 (68.1 - 81.3)    | 82.9 (78.8 - 86.2)    | 64.4 (40.1 - 80.9)    | 88.9 (81.1 - 93.6)    |
|                                      | 65-79    | 70.4 (63.6 - 76.1)    | 78.0 (71.7 - 83.1)    | 73.8 (66.3 - 79.8)    | 65.7 (50.7 - 77.2)    | 67.7 (50.7 - 80.0)        | 72.7 (64.9 - 79.1)    | 72.8 (64.1 - 79.8)    | 64.6 (38.5 - 81.9)    | 72.8 (63.3 - 80.2)    |
|                                      | 80-99    | 44.4 (30.0 - 57.8)    | 61.6 (48.0 - 72.7)    | 62.6 (44.5 - 76.3)    | 53.4 (13.3 - 82.2)    | 4.5 (0.0 - 43.9)          | 41.2 (21.4 - 60.0)    | 58.8 (46.7 - 69.1)    | 48.7 (7.3 - 82.1)     | 41.1 (23.3 - 58.1)    |
| Distant                              | All ages | 15.7 (12.0 - 19.9)    | 15.6 (11.5 - 20.1)    | 13.5 (9.8 - 17.8)     | 16.5 (9.8 - 24.8)     | 9.8 (4.2 - 18.4)          | 8.3 (5.0 - 12.8)      | 17.8 (13.7 - 22.4)    | 18.6 (6.1 - 36.3)     | 16.8 (11.5 - 22.9)    |
|                                      | 15-49    | 26.7 (14.8 - 40.1)    | 26.6 (13.9 - 41.1)    | 20.7 (9.6 - 34.7)     | 32.7 (5.2 - 65.6)     | 9.5 (1.0 - 29.7)          | 18.2 (6.5 - 34.5)     | 40.2 (26.7 - 53.3)    | *                     | 24.8 (9.6 - 43.6)     |
|                                      | 50-64    | 18.9 (12.9 - 25.8)    | 20.7 (13.8 - 28.6)    | 14.1 (8.5 - 21.0)     | 16.5 (6.4 - 30.6)     | 15.4 (4.4 - 32.5)         | 13.9 (6.9 - 23.4)     | 19.1 (12.3 - 27.0)    | 48.6 (12.3 - 78.0)    | 28.3 (17.1 - 40.7)    |
|                                      | 65-79    | 16.1 (9.8 - 23.7)     | 13.2 (7.2 - 20.9)     | 12.5 (6.5 - 20.4)     | 18.9 (8.7 - 32.3)     | 12.1 (2.9 - 28.5)         | 7.3 (2.9 - 14.4)      | 16.8 (10.4 - 24.5)    | *                     | 11.1 (5.2 - 19.5)     |
|                                      | 80-99    | 3.9 (0.5 - 13.4)      | *                     | 8.8 (1.5 - 24.4)      | *                     | 3.1 (0.0 - 34.3)          | *                     | *                     | *                     | 8.4 (1.5 - 22.9)      |
| Missing                              | All ages | 20.7 (5.2 - 43.2)     | 56.0 (49.3 - 62.2)    | 25.4 (12.8 - 40.2)    | 52.4 (32.4 - 68.9)    | 39.8 (4.8 - 75.6)         | 53.6 (28.6 - 73.3)    | 56.9 (52.7 - 60.9)    | 9.5 (0.0 - 66.6)      | 27.9 (11.3 - 47.3)    |
|                                      | 15-49    | *                     | 74.0 (54.7 - 86.1)    | 100.0 (100.0 - 100.0) | 100.0 (100.0 - 100.0) | 100.0 (100.0 - 100.0)     | 100.0 (100.0 - 100.0) | 84.7 (76.9 - 90.1)    | 100.0 (100.0 - 100.0) | 51.7 (0.8 - 91.3)     |
|                                      | 50-64    | 41.2 (8.5 - 72.7)     | 69.0 (57.0 - 78.2)    | 16.7 (2.6 - 41.6)     | 100.0 (100.0 - 100.0) | 100.0 (100.0 - 100.0)     | 87.2 (17.8 - 98.9)    | 78.0 (72.2 - 82.7)    | 100.0 (100.0 - 100.0) | 69.2 (45 - 95.7)      |
|                                      | 65-79    | 5.4 (0.1 - 31.8)      | 58.8 (45.9 - 69.6)    | 7.6 (0.5 - 28.0)      | 18.2 (4.3 - 39.6)     | 30.5 (1.3 - 72.4)         | 39.9 (11.1 - 68.1)    | 52.3 (44.8 - 59.2)    | 44.8 (2.5 - 84.0)     | 29.5 (6.7 - 57.6)     |
|                                      | 80-99    | 11.6 (0.5 - 41.6)     | 22.6 (14.0 - 32.4)    | 20.0 (3.3 - 46.7)     | 16.9 (0.5 - 55.6)     | 6.7 (0.0 - 55.8)          | *                     | 24.7 (17.7 - 32.4)    | *                     | 7.1 (0.2 - 31.1)      |

Abbreviation: NS = net survival, CI = confidence interval

All ages=Age-standardised

<sup>1</sup> Model1: Age spline with mapped SEER stage as time-dependent covariate

<sup>2</sup> Model2: Age spline allowing separate models for each stage category

\* Not possible to estimate

**Supplementary Table 20.** Median age, number of cases and imputed proportion (%) of colon and rectal cancers by stage for individual registries in Australia, 2010-2014

| Country         | Colon cancer |                  |                     |             |           |                  |                     | Rectal cancer |         |                  |                     |             |           |                  |                     |             |
|-----------------|--------------|------------------|---------------------|-------------|-----------|------------------|---------------------|---------------|---------|------------------|---------------------|-------------|-----------|------------------|---------------------|-------------|
|                 | TNM stage    |                  |                     | Mapped SEER |           |                  |                     | TNM stage     |         |                  | Mapped SEER         |             |           |                  |                     |             |
|                 | Stage        | Median age (IQR) | Number of cases (%) | Imputed (%) | Stage     | Median age (IQR) | Number of cases (%) | Imputed (%)   | Stage   | Median age (IQR) | Number of cases (%) | Imputed (%) | Stage     | Median age (IQR) | Number of cases (%) | Imputed (%) |
| New South Wales | All          |                  |                     |             | All       | 72 (63-80)       | 17,870              |               | All     | 67 (58-76)       | 6,181               |             | All       | 67 (58-76)       | 6,181               |             |
|                 | I            |                  |                     |             | Localised | 72 (63-79)       | 5227 (31.4)         | 31.3          | I       |                  |                     |             | Localised | 67 (58-76)       | 2045 (37.1)         | 38.4        |
|                 | II           |                  |                     |             | Regional  | 72 (63-80)       | 7778 (46.7)         | 47.0          | II      |                  |                     |             | Regional  | 66 (58-76)       | 2507 (45.4)         | 44.3        |
|                 | III          |                  |                     |             | Distant   | 71 (61-80)       | 3664 (22.0)         | 21.7          | III     |                  |                     |             | Distant   | 67 (57-76)       | 964 (17.5)          | 17.3        |
|                 | IV           |                  |                     |             | Missing   | 73 (63-82)       | 1201 (6.7)          |               | IV      |                  |                     |             | Missing   | 65 (56-76)       | 665 (10.8)          |             |
|                 | Missing      |                  |                     |             |           |                  |                     |               | Missing |                  |                     |             |           |                  |                     |             |
| Victoria        | All          | 72 (62-80)       | 12,932              |             | All       | 72 (62-80)       | 12,932              |               | All     | 67 (57-77)       | 4,877               |             | All       | 67 (57-77)       | 4,877               |             |
|                 | I            | 70 (62-79)       | 2455 (21.2)         | 20.7        | Localised | 72 (64-80)       | 5516 (47.6)         | 46.8          | I       | 67 (58-76)       | 1360 (35.0)         | 34.9        | Localised | 68 (59-76)       | 2128 (54.8)         | 53.8        |
|                 | II           | 74 (65-81)       | 3684 (31.8)         | 31.7        | Regional  | 72 (61-80)       | 3699 (31.9)         | 32.1          | II      | 69 (60-77)       | 847 (21.8)          | 21.0        | Regional  | 65 (55-76)       | 1088 (28.0)         | 27.8        |
|                 | III          | 71 (61-79)       | 3076 (26.6)         | 26.5        | Distant   | 69 (59-78)       | 2364 (20.4)         | 21.2          | III     | 65 (56-76)       | 1009 (26.0)         | 25.7        | Distant   | 65 (56-75)       | 665 (17.1)          | 18.4        |
|                 | IV           | 69 (59-78)       | 2364 (20.4)         | 21.1        | Missing   | 76 (63-85)       | 1353 (10.5)         |               | IV      | 65 (56-75)       | 665 (17.1)          | 18.3        | Missing   | 70 (58-81)       | 996 (20.4)          |             |
|                 | Missing      | 76 (63-85)       | 1353 (10.5)         |             |           |                  |                     |               | Missing | 70 (58-81)       | 996 (20.4)          |             |           |                  |                     |             |

**Supplementary Table 21A.** Age-standardised and age-specific one-year net survival (%) by imputed stage at diagnosis for individual registries in Australia for colon cancer patients diagnosed during 2010-2014

| Stage                                |          | New South Wales     | Victoria              |
|--------------------------------------|----------|---------------------|-----------------------|
|                                      |          | 1-year NS (95% CI)  | 1-year NS (95% CI)    |
| All patients <sup>‡</sup>            | All ages | 86.9 (86.3 - 87.6)  | 88.2 (87.5 - 88.9)    |
|                                      | 15-49    | 92.1 (90.2 - 93.6)  | 91.9 (89.7 - 93.7)    |
|                                      | 50-64    | 91.1 (89.9 - 92.1)  | 91.9 (90.5 - 93.0)    |
|                                      | 65-79    | 87.3 (86.3 - 88.2)  | 88.5 (87.3 - 89.5)    |
|                                      | 80-99    | 75.3 (73.5 - 77.0)  | 79.0 (77.0 - 80.8)    |
| <b>TNM Stage<sup>¶</sup></b>         |          |                     |                       |
| Stage I                              | All ages |                     | 99.1 (98.3 - 99.9)    |
|                                      | 15-49    |                     | 99.2 (97.5 - 100.0)   |
|                                      | 50-64    |                     | 99.7 (98.9 - 100.0)   |
|                                      | 65-79    |                     | 99.0 (97.8 - 100.0)   |
|                                      | 80-99    |                     | 98.2 (94.7 - 100.0)   |
| Stage II                             | All ages |                     | 97.5 (96.7 - 98.3)    |
|                                      | 15-49    |                     | 100.0 (100.0 - 100.0) |
|                                      | 50-64    |                     | 99.5 (98.6 - 100.0)   |
|                                      | 65-79    |                     | 97.2 (95.9 - 98.4)    |
|                                      | 80-99    |                     | 93.1 (90.5 - 95.8)    |
| Stage III                            | All ages |                     | 92.4 (91.2 - 93.6)    |
|                                      | 15-49    |                     | 96.2 (93.6 - 98.7)    |
|                                      | 50-64    |                     | 97.6 (96.2 - 99.0)    |
|                                      | 65-79    |                     | 92.4 (90.5 - 94.3)    |
|                                      | 80-99    |                     | 80.8 (76.5 - 85.2)    |
| Stage IV                             | All ages |                     | 58.3 (55.9 - 60.6)    |
|                                      | 15-49    |                     | 73.6 (67.3 - 79.9)    |
|                                      | 50-64    |                     | 69.8 (65.6 - 74.1)    |
|                                      | 65-79    |                     | 56.9 (53.1 - 60.6)    |
|                                      | 80-99    |                     | 31.2 (26.6 - 35.8)    |
| <b>Mapped SEER stage<sup>¶</sup></b> |          |                     |                       |
| Localised                            | All ages | 97.4 (96.7 - 98.1)  | 98.7 (98.1 - 99.3)    |
|                                      | 15-49    | 99.4 (98.4 - 100.0) | 99.7 (99.0 - 100.0)   |
|                                      | 50-64    | 99.5 (98.7 - 100.0) | 99.6 (99.0 - 100.0)   |
|                                      | 65-79    | 98.4 (97.5 - 99.3)  | 98.7 (97.9 - 99.6)    |
|                                      | 80-99    | 90.2 (87.4 - 93.1)  | 96.3 (93.9 - 98.7)    |
| Regional                             | All ages | 94.9 (94.2 - 95.6)  | 92.6 (91.5 - 93.7)    |
|                                      | 15-49    | 97.8 (96.3 - 99.3)  | 96.7 (94.6 - 98.9)    |
|                                      | 50-64    | 97.5 (96.5 - 98.5)  | 97.7 (96.4 - 99.0)    |
|                                      | 65-79    | 95.2 (94.2 - 96.1)  | 91.9 (90.2 - 93.7)    |
|                                      | 80-99    | 87.5 (85.2 - 89.8)  | 81.9 (78.3 - 85.4)    |
| Distant                              | All ages | 55.2 (53.2 - 57.1)  | 58.2 (55.9 - 60.5)    |
|                                      | 15-49    | 72.5 (66.8 - 78.2)  | 73.6 (67.3 - 79.9)    |
|                                      | 50-64    | 68.7 (65.0 - 72.3)  | 69.9 (65.7 - 74.1)    |
|                                      | 65-79    | 51.1 (48.0 - 54.1)  | 56.8 (53.1 - 60.5)    |
|                                      | 80-99    | 29.0 (25.3 - 32.6)  | 31.4 (26.7 - 36.1)    |

Abbreviation: NS = net survival, CI = confidence interval

All ages=Age-standardised

<sup>‡</sup> Model1: Age spline with mapped SEER stage as time-dependent covariate

<sup>¶</sup> Model2: Age spline allowing separate models for each stage category



**Supplementary Table 21B.** Age-standardised and age-specific five-year net survival (%) by imputed stage at diagnosis for individual registries in Australia for colon cancer patients diagnosed during 2010-2014

| Stage                                |          | New South Wales    | Victoria             |
|--------------------------------------|----------|--------------------|----------------------|
|                                      |          | 5-year NS (95% CI) | 5-year NS (95% CI)   |
| All patients <sup>‡</sup>            | All ages | 71.3 (70.4 - 72.3) | 70.3 (69.1 - 71.4)   |
|                                      | 15-49    | 74.9 (72.0 - 77.5) | 72.1 (68.6 - 75.3)   |
|                                      | 50-64    | 73.8 (72.1 - 75.4) | 72.1 (70.0 - 74.0)   |
|                                      | 65-79    | 72.2 (70.8 - 73.6) | 71.1 (69.4 - 72.7)   |
|                                      | 80-99    | 62.9 (60.0 - 65.7) | 63.9 (60.4 - 67.2)   |
| <b>TNM Stage<sup>¶</sup></b>         |          |                    |                      |
| Stage I                              | All ages |                    | 97.5 (95.7 - 99.4)   |
|                                      | 15-49    |                    | 96.8 (93.0 - 100.0)  |
|                                      | 50-64    |                    | 96.5 (94.3 - 98.7)   |
|                                      | 65-79    |                    | 96.2 (93.6 - 98.8)   |
|                                      | 80-99    |                    | 100.0 (94.8 - 100.0) |
| Stage II                             | All ages |                    | 89.5 (87.8 - 91.3)   |
|                                      | 15-49    |                    | 94.2 (90.4 - 98.1)   |
|                                      | 50-64    |                    | 93.9 (91.5 - 96.3)   |
|                                      | 65-79    |                    | 87.9 (85.3 - 90.5)   |
|                                      | 80-99    |                    | 83.1 (77.0 - 89.1)   |
| Stage III                            | All ages |                    | 70.1 (67.9 - 72.3)   |
|                                      | 15-49    |                    | 79.6 (74.0 - 85.2)   |
|                                      | 50-64    |                    | 77.8 (74.4 - 81.2)   |
|                                      | 65-79    |                    | 68.3 (65.0 - 71.6)   |
|                                      | 80-99    |                    | 54.8 (48.0 - 61.5)   |
| Stage IV                             | All ages |                    | 15.8 (14.1 - 17.6)   |
|                                      | 15-49    |                    | 28.0 (21.4 - 34.7)   |
|                                      | 50-64    |                    | 19.4 (15.9 - 22.8)   |
|                                      | 65-79    |                    | 14.6 (11.8 - 17.5)   |
|                                      | 80-99    |                    | 4.3 (2.0 - 6.5)      |
| <b>Mapped SEER stage<sup>¶</sup></b> |          |                    |                      |
| Localised                            | All ages | 95.3 (93.9 - 96.6) | 94.9 (93.6 - 96.2)   |
|                                      | 15-49    | 96.4 (93.9 - 98.8) | 96.2 (93.4 - 99.0)   |
|                                      | 50-64    | 97.5 (95.9 - 99.1) | 95.4 (93.8 - 97.1)   |
|                                      | 65-79    | 96.0 (94.1 - 97.8) | 94.0 (92.1 - 95.9)   |
|                                      | 80-99    | 89.1 (83.5 - 94.6) | 95.5 (90.1 - 100.0)  |
| Regional                             | All ages | 80.9 (79.6 - 82.3) | 70.3 (68.3 - 72.4)   |
|                                      | 15-49    | 89.4 (86.3 - 92.6) | 80.6 (75.6 - 85.7)   |
|                                      | 50-64    | 83.9 (81.7 - 86.0) | 79.1 (75.8 - 82.4)   |
|                                      | 65-79    | 79.9 (77.9 - 81.9) | 67.6 (64.5 - 70.8)   |
|                                      | 80-99    | 72.2 (67.8 - 76.6) | 54.1 (48.2 - 60.1)   |
| Distant                              | All ages | 18.3 (16.7 - 19.9) | 15.9 (14.0 - 17.7)   |
|                                      | 15-49    | 26.0 (20.3 - 31.6) | 28.1 (21.4 - 34.8)   |
|                                      | 50-64    | 24.9 (21.6 - 28.2) | 19.7 (16.2 - 23.1)   |
|                                      | 65-79    | 15.5 (13.3 - 17.8) | 14.7 (11.8 - 17.5)   |
|                                      | 80-99    | 8.2 (5.6 - 10.9)   | 4.1 (1.9 - 6.3)      |

Abbreviation: NS = net survival, CI = confidence interval

All ages=Age-standardised

<sup>‡</sup> Model1: Age spline with mapped SEER stage as time-dependent covariate

<sup>¶</sup> Model2: Age spline allowing separate models for each stage category

**Supplementary Table 22A.** Age-standardised and age-specific one-year net survival (%) by imputed stage at diagnosis for individual registries in Australia for rectal cancer patients diagnosed during 2010-2014

| Stage                                |          | New South Wales       | Victoria              |
|--------------------------------------|----------|-----------------------|-----------------------|
|                                      |          | 1-year NS (95% CI)    | 1-year NS (95% CI)    |
| All patients <sup>‡</sup>            | All ages | 89.0 (87.9 - 90.0)    | 91.3 (90.1 - 92.3)    |
|                                      | 15-49    | 95.5 (93.1 - 97.1)    | 96.3 (93.9 - 97.8)    |
|                                      | 50-64    | 93.4 (91.9 - 94.7)    | 94.8 (93.2 - 96.1)    |
|                                      | 65-79    | 88.4 (86.6 - 89.9)    | 90.7 (88.8 - 92.3)    |
|                                      | 80-99    | 78.0 (74.0 - 81.4)    | 82.8 (78.7 - 86.1)    |
| <b>TNM Stage<sup>‡</sup></b>         |          |                       |                       |
| Stage I                              | All ages |                       | 98.1 (96.9 - 99.3)    |
|                                      | 15-49    |                       | 100.0 (100.0 - 100.0) |
|                                      | 50-64    |                       | 99.7 (98.7 - 100.0)   |
|                                      | 65-79    |                       | 96.5 (94.2 - 98.8)    |
|                                      | 80-99    |                       | 97.6 (92.3 - 100.0)   |
| Stage II                             | All ages |                       | 97.7 (95.8 - 99.5)    |
|                                      | 15-49    |                       | 99.8 (98.0 - 100.0)   |
|                                      | 50-64    |                       | 98.6 (96.6 - 100.0)   |
|                                      | 65-79    |                       | 97.6 (94.4 - 100.0)   |
|                                      | 80-99    |                       | 94.1 (86.7 - 100.0)   |
| Stage III                            | All ages |                       | 94.1 (91.3 - 96.9)    |
|                                      | 15-49    |                       | 99.4 (97.8 - 100.0)   |
|                                      | 50-64    |                       | 97.1 (94.5 - 99.7)    |
|                                      | 65-79    |                       | 94.0 (90.4 - 97.5)    |
|                                      | 80-99    |                       | 86.1 (76.4 - 95.8)    |
| Stage IV                             | All ages |                       | 66.3 (61.7 - 70.8)    |
|                                      | 15-49    |                       | 85.6 (78.5 - 92.7)    |
|                                      | 50-64    |                       | 77.2 (70.7 - 83.8)    |
|                                      | 65-79    |                       | 63.4 (56.3 - 70.6)    |
|                                      | 80-99    |                       | 40.5 (28.8 - 52.2)    |
| <b>Mapped SEER stage<sup>‡</sup></b> |          |                       |                       |
| Localised                            | All ages | 95.3 (94.0 - 96.7)    | 98.0 (96.8 - 99.1)    |
|                                      | 15-49    | 100.0 (100.0 - 100.0) | 99.9 (98.8 - 100.0)   |
|                                      | 50-64    | 97.9 (96.4 - 99.4)    | 99.4 (98.4 - 100.0)   |
|                                      | 65-79    | 95.4 (93.5 - 97.4)    | 97.2 (95.4 - 98.9)    |
|                                      | 80-99    | 87.6 (82.2 - 93.1)    | 96.0 (90.9 - 100.0)   |
| Regional                             | All ages | 95.4 (94.1 - 96.6)    | 94.9 (92.9 - 96.9)    |
|                                      | 15-49    | 99.1 (97.8 - 100.0)   | 99.8 (98.5 - 100.0)   |
|                                      | 50-64    | 97.8 (96.5 - 99.1)    | 97.2 (95.1 - 99.3)    |
|                                      | 65-79    | 94.7 (92.8 - 96.6)    | 94.3 (91.3 - 97.3)    |
|                                      | 80-99    | 89.6 (84.2 - 94.9)    | 88.9 (81.3 - 96.5)    |
| Distant                              | All ages | 59.0 (55.1 - 62.8)    | 66.0 (61.8 - 70.1)    |
|                                      | 15-49    | 78.9 (70.1 - 87.7)    | 84.9 (77.4 - 92.4)    |
|                                      | 50-64    | 73.3 (67.6 - 79.0)    | 77.1 (70.7 - 83.5)    |
|                                      | 65-79    | 53.3 (47.0 - 59.6)    | 62.9 (56.0 - 69.8)    |
|                                      | 80-99    | 33.9 (25.0 - 42.7)    | 40.4 (30.4 - 50.4)    |

Abbreviation: NS = net survival, CI = confidence interval

All ages=Age-standardised

<sup>‡</sup> Model1: Age spline with mapped SEER stage as time-dependent covariate

<sup>‡</sup> Model2: Age spline allowing separate models for each stage category

**Supplementary Table 22B.** Age-standardised and age-specific five-year net survival (%) by imputed stage at diagnosis for individual registries in Australia for rectal cancer patients diagnosed during 2010-2014

| Stage                                |          | New South Wales     | Victoria            |
|--------------------------------------|----------|---------------------|---------------------|
|                                      |          | 5-year NS (95% CI)  | 5-year NS (95% CI)  |
| All patients <sup>‡</sup>            | All ages | 69.2 (67.6 - 70.8)  | 72.8 (70.9 - 74.6)  |
|                                      | 15-49    | 77.7 (73.8 - 81.1)  | 78.2 (73.8 - 82.0)  |
|                                      | 50-64    | 75.1 (72.8 - 77.3)  | 75.7 (73.0 - 78.2)  |
|                                      | 65-79    | 68.4 (65.8 - 70.8)  | 73.3 (70.4 - 76.0)  |
|                                      | 80-99    | 54.2 (48.3 - 59.7)  | 62.7 (55.9 - 68.7)  |
| <b>TNM Stage<sup>‡</sup></b>         |          |                     |                     |
| Stage I                              | All ages |                     | 94.9 (92.1 - 97.8)  |
|                                      | 15-49    |                     | 99.2 (96.7 - 100.0) |
|                                      | 50-64    |                     | 94.4 (91.2 - 97.5)  |
|                                      | 65-79    |                     | 93.8 (90.1 - 97.6)  |
|                                      | 80-99    |                     | 96.1 (82.0 - 100.0) |
| Stage II                             | All ages |                     | 86.4 (82.7 - 90.1)  |
|                                      | 15-49    |                     | 92.7 (85.8 - 99.5)  |
|                                      | 50-64    |                     | 86.7 (82.0 - 91.5)  |
|                                      | 65-79    |                     | 86.1 (80.5 - 91.8)  |
|                                      | 80-99    |                     | 81.9 (66.7 - 97.1)  |
| Stage III                            | All ages |                     | 67.9 (63.3 - 72.5)  |
|                                      | 15-49    |                     | 79.1 (71.3 - 87.0)  |
|                                      | 50-64    |                     | 76.6 (71.1 - 82.1)  |
|                                      | 65-79    |                     | 66.3 (60.1 - 72.6)  |
|                                      | 80-99    |                     | 50.5 (37.1 - 64.0)  |
| Stage IV                             | All ages |                     | 19.2 (15.6 - 22.7)  |
|                                      | 15-49    |                     | 37.1 (26.0 - 48.1)  |
|                                      | 50-64    |                     | 24.1 (17.8 - 30.4)  |
|                                      | 65-79    |                     | 18.3 (12.2 - 24.4)  |
|                                      | 80-99    |                     | 3.5 (0.0 - 8.7)     |
| <b>Mapped SEER stage<sup>‡</sup></b> |          |                     |                     |
| Localised                            | All ages | 86.9 (84.4 - 89.5)  | 92.4 (89.9 - 94.8)  |
|                                      | 15-49    | 97.7 (94.6 - 100.0) | 96.6 (93.4 - 99.9)  |
|                                      | 50-64    | 91.7 (88.9 - 94.6)  | 92.1 (89.6 - 94.6)  |
|                                      | 65-79    | 86.5 (82.9 - 90.1)  | 91.8 (88.5 - 95.1)  |
|                                      | 80-99    | 71.9 (61.6 - 82.1)  | 91.5 (81.5 - 100.0) |
| Regional                             | All ages | 75.5 (73.1 - 78.0)  | 68.6 (64.9 - 72.4)  |
|                                      | 15-49    | 85.4 (80.7 - 90.2)  | 80.1 (72.9 - 87.2)  |
|                                      | 50-64    | 80.5 (77.3 - 83.6)  | 76.9 (71.9 - 81.9)  |
|                                      | 65-79    | 73.9 (70.3 - 77.5)  | 65.7 (60.2 - 71.3)  |
|                                      | 80-99    | 61.9 (52.6 - 71.3)  | 53.5 (41.1 - 65.9)  |
| Distant                              | All ages | 16.3 (13.5 - 19.1)  | 19.2 (15.6 - 22.7)  |
|                                      | 15-49    | 27.5 (18.0 - 37.0)  | 38.6 (27.1 - 50.0)  |
|                                      | 50-64    | 25.2 (19.5 - 31.0)  | 23.6 (17.4 - 29.7)  |
|                                      | 65-79    | 12.1 (8.3 - 16.0)   | 18.8 (13.0 - 24.6)  |
|                                      | 80-99    | 4.6 (0.4 - 8.7)     | 2.4 (0.0 - 5.8)     |

Abbreviation: NS = net survival, CI = confidence interval

All ages=Age-standardised

<sup>‡</sup> Model1: Age spline with mapped SEER stage as time-dependent covariate

<sup>‡</sup> Model2: Age spline allowing separate models for each stage category

**Supplementary Table 23A.** Age-standardised and age-specific one-year net survival (%) by stage at diagnosis (without imputation) for individual registries in Australia for colon cancer patients diagnosed during 2010-2014

| Stage                                |          | New South Wales    | Victoria              |
|--------------------------------------|----------|--------------------|-----------------------|
|                                      |          | 1-year NS (95% CI) | 1-year NS (95% CI)    |
| All patients <sup>‡</sup>            | All ages | 86.9 (86.3 - 87.6) | 88.2 (87.5 - 88.9)    |
|                                      | 15-49    | 92.1 (90.2 - 93.6) | 91.9 (89.7 - 93.7)    |
|                                      | 50-64    | 91.1 (89.9 - 92.1) | 91.9 (90.5 - 93.0)    |
|                                      | 65-79    | 87.3 (86.3 - 88.2) | 88.5 (87.3 - 89.5)    |
|                                      | 80-99    | 75.3 (73.5 - 77.0) | 79.0 (77.0 - 80.8)    |
| <b>TNM Stage<sup>¶</sup></b>         |          |                    |                       |
| Stage I                              | All ages |                    | 99.6 (97.5 - 99.9)    |
|                                      | 15-49    |                    | 99.3 (93.3 - 99.9)    |
|                                      | 50-64    |                    | 99.7 (95.4 - 100.0)   |
|                                      | 65-79    |                    | 99.0 (96.8 - 99.7)    |
|                                      | 80-99    |                    | 100.0 (100.0 - 100.0) |
| Stage II                             | All ages |                    | 98.4 (97.5 - 98.9)    |
|                                      | 15-49    |                    | 100.0 (100.0 - 100.0) |
|                                      | 50-64    |                    | 99.6 (96.8 - 99.9)    |
|                                      | 65-79    |                    | 97.4 (95.8 - 98.4)    |
|                                      | 80-99    |                    | 97.1 (93.6 - 98.7)    |
| Stage III                            | All ages |                    | 93.7 (92.5 - 94.7)    |
|                                      | 15-49    |                    | 95.7 (91.7 - 97.8)    |
|                                      | 50-64    |                    | 97.6 (95.8 - 98.7)    |
|                                      | 65-79    |                    | 93.2 (91.1 - 94.8)    |
|                                      | 80-99    |                    | 86.1 (81.8 - 89.4)    |
| Stage IV                             | All ages |                    | 59.4 (56.9 - 61.7)    |
|                                      | 15-49    |                    | 71.7 (64.3 - 77.9)    |
|                                      | 50-64    |                    | 69.6 (65.0 - 73.7)    |
|                                      | 65-79    |                    | 58.4 (54.5 - 62.2)    |
|                                      | 80-99    |                    | 34.2 (29.1 - 39.4)    |
| Missing                              | All ages |                    | 78.4 (75.4 - 81.0)    |
|                                      | 15-49    |                    | 97.3 (91.6 - 99.2)    |
|                                      | 50-64    |                    | 92.8 (87.2 - 96.0)    |
|                                      | 65-79    |                    | 77.0 (71.1 - 81.8)    |
|                                      | 80-99    |                    | 50.8 (45.1 - 56.1)    |
| <b>Mapped SEER stage<sup>¶</sup></b> |          |                    |                       |
| Localised                            | All ages | 97.5 (96.8 - 98.1) | 99.3 (98.6 - 99.7)    |
|                                      | 15-49    | 99.4 (97.1 - 99.9) | 99.7 (95.5 - 100.0)   |
|                                      | 50-64    | 99.4 (97.8 - 99.8) | 99.7 (97.8 - 99.9)    |
|                                      | 65-79    | 98.4 (97.2 - 99.1) | 98.9 (97.8 - 99.5)    |
|                                      | 80-99    | 91.0 (87.9 - 93.3) | 99.4 (87.7 - 100.0)   |
| Regional                             | All ages | 95.2 (94.5 - 95.8) | 93.9 (92.8 - 94.8)    |
|                                      | 15-49    | 97.8 (95.5 - 98.9) | 96.3 (92.9 - 98.1)    |
|                                      | 50-64    | 97.4 (96.2 - 98.2) | 97.9 (96.2 - 98.8)    |
|                                      | 65-79    | 95.2 (94.1 - 96.1) | 92.5 (90.6 - 94.1)    |
|                                      | 80-99    | 89.1 (86.6 - 91.1) | 87.4 (83.8 - 90.3)    |
| Distant                              | All ages | 55.3 (53.2 - 57.2) | 59.3 (56.9 - 61.7)    |
|                                      | 15-49    | 72.2 (65.9 - 77.6) | 71.7 (64.3 - 77.9)    |
|                                      | 50-64    | 68.5 (64.6 - 72.1) | 69.6 (65.0 - 73.7)    |
|                                      | 65-79    | 50.9 (47.7 - 53.9) | 58.4 (54.5 - 62.2)    |
|                                      | 80-99    | 29.9 (26.1 - 33.7) | 34.2 (29.1 - 39.4)    |
| Missing                              | All ages | 84.1 (81.4 - 86.5) | 78.4 (75.4 - 81.0)    |
|                                      | 15-49    | 93.1 (84.0 - 97.1) | 97.3 (91.6 - 99.2)    |
|                                      | 50-64    | 93.2 (87.5 - 96.3) | 92.8 (87.2 - 96.0)    |
|                                      | 65-79    | 88.0 (83.6 - 91.2) | 77.0 (71.1 - 81.8)    |
|                                      | 80-99    | 59.2 (52.3 - 65.5) | 50.8 (45.1 - 56.1)    |

Abbreviation: NS = net survival, CI = confidence interval

<sup>‡</sup> All ages=Age-standardised

<sup>‡</sup> Model1: Age spline with mapped SEER stage as time-dependent covariate

<sup>¶</sup> Model2: Age spline allowing separate models for each stage category

**Supplementary Table 23B.** Age-standardised and age-specific five-year net survival (%) by stage at diagnosis (without imputation) for individual registries in Australia for colon cancer patients diagnosed during 2010-2014

| Stage                                |          | New South Wales    | Victoria              |
|--------------------------------------|----------|--------------------|-----------------------|
|                                      |          | 5-year NS (95% CI) | 5-year NS (95% CI)    |
| All patients <sup>‡</sup>            | All ages | 71.3 (70.4 - 72.3) | 70.3 (69.1 - 71.4)    |
|                                      | 15-49    | 74.9 (72.0 - 77.5) | 72.1 (68.6 - 75.3)    |
|                                      | 50-64    | 73.8 (72.1 - 75.4) | 72.1 (70.0 - 74.0)    |
|                                      | 65-79    | 72.2 (70.8 - 73.6) | 71.1 (69.4 - 72.7)    |
|                                      | 80-99    | 62.9 (60.0 - 65.7) | 63.9 (60.4 - 67.2)    |
| <b>TNM Stage<sup>§</sup></b>         |          |                    |                       |
| Stage I                              | All ages |                    | 98.4 (95.0 - 99.5)    |
|                                      | 15-49    |                    | 97.1 (90.6 - 99.1)    |
|                                      | 50-64    |                    | 96.6 (93.5 - 98.2)    |
|                                      | 65-79    |                    | 96.4 (92.6 - 98.2)    |
|                                      | 80-99    |                    | 100.0 (100.0 - 100.0) |
| Stage II                             | All ages |                    | 91.0 (89.1 - 92.6)    |
|                                      | 15-49    |                    | 93.7 (87.9 - 96.8)    |
|                                      | 50-64    |                    | 94.0 (91.0 - 96.0)    |
|                                      | 65-79    |                    | 88.4 (85.6 - 90.7)    |
|                                      | 80-99    |                    | 89.8 (81.2 - 94.6)    |
| Stage III                            | All ages |                    | 71.5 (69.2 - 73.7)    |
|                                      | 15-49    |                    | 78.3 (71.6 - 83.6)    |
|                                      | 50-64    |                    | 77.3 (73.5 - 80.6)    |
|                                      | 65-79    |                    | 69.1 (65.6 - 72.3)    |
|                                      | 80-99    |                    | 62.1 (54.4 - 68.8)    |
| Stage IV                             | All ages |                    | 16.4 (14.5 - 18.3)    |
|                                      | 15-49    |                    | 26.2 (19.9 - 32.9)    |
|                                      | 50-64    |                    | 19.1 (15.8 - 22.7)    |
|                                      | 65-79    |                    | 15.8 (12.9 - 19.0)    |
|                                      | 80-99    |                    | 5.7 (3.3 - 9.1)       |
| Missing                              | All ages |                    | 59.1 (55.3 - 62.8)    |
|                                      | 15-49    |                    | 86.3 (76.9 - 92.1)    |
|                                      | 50-64    |                    | 77.1 (69.5 - 83.1)    |
|                                      | 65-79    |                    | 56.9 (50.3 - 63.0)    |
|                                      | 80-99    |                    | 25.9 (20.2 - 32.0)    |
| <b>Mapped SEER stage<sup>¶</sup></b> |          |                    |                       |
| Localised                            | All ages | 95.4 (93.8 - 96.5) | 95.9 (94.4 - 97.0)    |
|                                      | 15-49    | 96.3 (92.6 - 98.2) | 96.2 (92.3 - 98.1)    |
|                                      | 50-64    | 97.5 (95.3 - 98.7) | 95.5 (93.4 - 96.9)    |
|                                      | 65-79    | 95.9 (93.5 - 97.4) | 94.2 (92.0 - 95.8)    |
|                                      | 80-99    | 89.5 (82.3 - 93.9) | 100.0 (100.0 - 100.0) |
| Regional                             | All ages | 81.0 (79.6 - 82.3) | 72.0 (69.9 - 74.0)    |
|                                      | 15-49    | 89.2 (85.4 - 92.0) | 79.3 (73.2 - 84.2)    |
|                                      | 50-64    | 83.4 (81.0 - 85.5) | 79.0 (75.6 - 82.1)    |
|                                      | 65-79    | 79.7 (77.6 - 81.6) | 68.7 (65.5 - 71.7)    |
|                                      | 80-99    | 74.4 (69.6 - 78.6) | 61.9 (54.9 - 68.1)    |
| Distant                              | All ages | 18.2 (16.7 - 19.8) | 16.4 (14.5 - 18.3)    |
|                                      | 15-49    | 24.6 (19.5 - 30.0) | 26.2 (19.9 - 32.9)    |
|                                      | 50-64    | 24.5 (21.2 - 27.8) | 19.1 (15.8 - 22.7)    |
|                                      | 65-79    | 15.5 (13.4 - 17.8) | 15.8 (12.9 - 19.0)    |
|                                      | 80-99    | 9.5 (6.8 - 12.7)   | 5.7 (3.3 - 9.1)       |
| Missing                              | All ages | 71.0 (67.3 - 74.4) | 59.1 (55.3 - 62.8)    |
|                                      | 15-49    | 84.1 (74.2 - 90.5) | 86.3 (76.9 - 92.1)    |
|                                      | 50-64    | 81.5 (74.2 - 86.8) | 77.1 (69.5 - 83.1)    |
|                                      | 65-79    | 74.9 (68.6 - 80.1) | 56.9 (50.3 - 63.0)    |
|                                      | 80-99    | 41.0 (31.9 - 49.9) | 25.9 (20.2 - 32.0)    |

Abbreviation: NS = net survival, CI = confidence interval

<sup>‡</sup> All ages=Age-standardised

<sup>§</sup> Model1: Age spline with mapped SEER stage as time-dependent covariate

<sup>¶</sup> Model2: Age spline allowing separate models for each stage category

**Supplementary Table 24A.** Age-standardised and age-specific one-year net survival (%) by stage at diagnosis (without imputation) for individual registries in Australia for rectal cancer patients diagnosed during 2010-2014

| Stage                                |          | New South Wales       | Victoria              |
|--------------------------------------|----------|-----------------------|-----------------------|
|                                      |          | 1-year NS (95% CI)    | 1-year NS (95% CI)    |
| All patients <sup>‡</sup>            | All ages | 89.0 (87.9 - 90.0)    | 91.3 (90.1 - 92.3)    |
|                                      | 15-49    | 95.5 (93.1 - 97.1)    | 96.3 (93.9 - 97.8)    |
|                                      | 50-64    | 93.4 (91.9 - 94.7)    | 94.8 (93.2 - 96.1)    |
|                                      | 65-79    | 88.4 (86.6 - 89.9)    | 90.7 (88.8 - 92.3)    |
|                                      | 80-99    | 78.0 (74.0 - 81.4)    | 82.8 (78.7 - 86.1)    |
| <b>TNM Stage<sup>§</sup></b>         |          |                       |                       |
| Stage I                              | All ages |                       | 99.0 (96.8 - 99.7)    |
|                                      | 15-49    |                       | 100.0 (100.0 - 100.0) |
|                                      | 50-64    |                       | 99.8 (78.4 - 100.0)   |
|                                      | 65-79    |                       | 97.2 (94.2 - 98.7)    |
|                                      | 80-99    |                       | 100.0 (100.0 - 100.0) |
| Stage II                             | All ages |                       | 99.2 (95.6 - 99.8)    |
|                                      | 15-49    |                       | 100.0 (100.0 - 100.0) |
|                                      | 50-64    |                       | 98.7 (94.0 - 99.7)    |
|                                      | 65-79    |                       | 99.3 (88.1 - 100.0)   |
|                                      | 80-99    |                       | 98.9 (11.1 - 100.0)   |
| Stage III                            | All ages |                       | 96.9 (94.5 - 98.3)    |
|                                      | 15-49    |                       | 100.0 (100.0 - 100.0) |
|                                      | 50-64    |                       | 97.7 (94.1 - 99.1)    |
|                                      | 65-79    |                       | 96.6 (92.4 - 98.5)    |
|                                      | 80-99    |                       | 94.3 (82.4 - 98.3)    |
| Stage IV                             | All ages |                       | 68.9 (64.1 - 73.2)    |
|                                      | 15-49    |                       | 85.6 (75.4 - 91.8)    |
|                                      | 50-64    |                       | 78.5 (70.7 - 84.4)    |
|                                      | 65-79    |                       | 68.8 (60.9 - 75.5)    |
|                                      | 80-99    |                       | 41.5 (29.6 - 53.1)    |
| Missing                              | All ages |                       | 83.7 (80.4 - 86.4)    |
|                                      | 15-49    |                       | 95.3 (87.7 - 98.3)    |
|                                      | 50-64    |                       | 92.2 (87.0 - 95.4)    |
|                                      | 65-79    |                       | 78.1 (71.7 - 83.3)    |
|                                      | 80-99    |                       | 66.5 (57.5 - 74.0)    |
| <b>Mapped SEER stage<sup>¶</sup></b> |          |                       |                       |
| Localised                            | All ages | 95.3 (93.7 - 96.5)    | 99.1 (97.5 - 99.6)    |
|                                      | 15-49    | 100.0 (100.0 - 100.0) | 100.0 (100.0 - 100.0) |
|                                      | 50-64    | 97.7 (95.4 - 98.9)    | 99.6 (96.7 - 100.0)   |
|                                      | 65-79    | 95.4 (92.9 - 97.1)    | 98.0 (95.8 - 99.1)    |
|                                      | 80-99    | 87.9 (81.1 - 92.4)    | 99.9 (0.0 - 100.0)    |
| Regional                             | All ages | 95.7 (94.2 - 96.7)    | 97.0 (94.8 - 98.3)    |
|                                      | 15-49    | 99.1 (95.6 - 99.8)    | 100.0 (100.0 - 100.0) |
|                                      | 50-64    | 97.8 (95.9 - 98.8)    | 97.4 (94.0 - 98.9)    |
|                                      | 65-79    | 94.8 (92.4 - 96.4)    | 96.6 (92.6 - 98.5)    |
|                                      | 80-99    | 91.1 (84.6 - 95.0)    | 95.4 (83.3 - 98.8)    |
| Distant                              | All ages | 58.4 (54.4 - 62.3)    | 68.9 (64.1 - 73.1)    |
|                                      | 15-49    | 77.5 (66.3 - 85.4)    | 85.4 (75.1 - 91.7)    |
|                                      | 50-64    | 71.7 (65.1 - 77.3)    | 78.5 (70.7 - 84.4)    |
|                                      | 65-79    | 53.5 (46.9 - 59.8)    | 68.8 (60.9 - 75.5)    |
|                                      | 80-99    | 34.7 (25.7 - 43.9)    | 41.5 (29.6 - 53.1)    |
| Missing                              | All ages | 88.6 (85.1 - 91.3)    | 83.7 (80.4 - 86.4)    |
|                                      | 15-49    | 97.7 (90.5 - 99.5)    | 95.3 (87.7 - 98.3)    |
|                                      | 50-64    | 96.2 (91.3 - 98.3)    | 92.2 (87.0 - 95.4)    |
|                                      | 65-79    | 87.3 (81.0 - 91.6)    | 78.1 (71.7 - 83.3)    |
|                                      | 80-99    | 70.2 (57.6 - 79.7)    | 66.5 (57.5 - 74.0)    |

Abbreviation: NS = net survival, CI = confidence interval

All ages=Age-standardised

<sup>‡</sup> Model1: Age spline with mapped SEER stage as time-dependent covariate

<sup>¶</sup> Model2: Age spline allowing separate models for each stage category

**Supplementary Table 24B.** Age-standardised and age-specific five-year net survival (%) by stage at diagnosis (without imputation) for individual registries in Australia for rectal cancer patients diagnosed during 2010-2014

| Stage                                |          | New South Wales    | Victoria              |
|--------------------------------------|----------|--------------------|-----------------------|
|                                      |          | 5-year NS (95% CI) | 5-year NS (95% CI)    |
| All patients <sup>‡</sup>            | All ages | 69.2 (67.6 - 70.8) | 72.8 (70.9 - 74.6)    |
|                                      | 15-49    | 77.7 (73.8 - 81.1) | 78.2 (73.8 - 82.0)    |
|                                      | 50-64    | 75.1 (72.8 - 77.3) | 75.7 (73.0 - 78.2)    |
|                                      | 65-79    | 68.4 (65.8 - 70.8) | 73.3 (70.4 - 76.0)    |
|                                      | 80-99    | 54.2 (48.3 - 59.7) | 62.7 (55.9 - 68.7)    |
| <b>TNM Stage<sup>¶</sup></b>         |          |                    |                       |
| Stage I                              | All ages |                    | 97.5 (92.6 - 99.2)    |
|                                      | 15-49    |                    | 99.6 (43.2 - 100.0)   |
|                                      | 50-64    |                    | 94.7 (90.8 - 97.0)    |
|                                      | 65-79    |                    | 95.3 (89.6 - 97.9)    |
|                                      | 80-99    |                    | 100.0 (100.0 - 100.0) |
| Stage II                             | All ages |                    | 89.1 (84.7 - 92.2)    |
|                                      | 15-49    |                    | 91.4 (79.2 - 96.6)    |
|                                      | 50-64    |                    | 86.2 (80.0 - 90.5)    |
|                                      | 65-79    |                    | 88.4 (81.8 - 92.7)    |
|                                      | 80-99    |                    | 95.3 (29.8 - 99.8)    |
| Stage III                            | All ages |                    | 72.0 (67.7 - 75.8)    |
|                                      | 15-49    |                    | 76.3 (66.5 - 83.7)    |
|                                      | 50-64    |                    | 76.9 (71.0 - 81.8)    |
|                                      | 65-79    |                    | 68.7 (62.1 - 74.4)    |
|                                      | 80-99    |                    | 69.2 (52.2 - 81.2)    |
| Stage IV                             | All ages |                    | 21.2 (17.4 - 25.2)    |
|                                      | 15-49    |                    | 35.5 (24.3 - 46.8)    |
|                                      | 50-64    |                    | 24.5 (18.2 - 31.3)    |
|                                      | 65-79    |                    | 22.5 (16.1 - 29.7)    |
|                                      | 80-99    |                    | 4.1 (0.6 - 13.7)      |
| Missing                              | All ages |                    | 60.8 (56.5 - 64.7)    |
|                                      | 15-49    |                    | 84.9 (75.4 - 91.0)    |
|                                      | 50-64    |                    | 74.4 (67.8 - 79.8)    |
|                                      | 65-79    |                    | 57.4 (50.1 - 64.0)    |
|                                      | 80-99    |                    | 25.0 (16.7 - 34.2)    |
| <b>Mapped SEER stage<sup>¶</sup></b> |          |                    |                       |
| Localised                            | All ages | 86.6 (83.8 - 88.9) | 95.1 (92.3 - 96.9)    |
|                                      | 15-49    | 98.0 (92.3 - 99.5) | 96.9 (91.2 - 98.9)    |
|                                      | 50-64    | 91.6 (88.2 - 94.1) | 92.2 (89.0 - 94.5)    |
|                                      | 65-79    | 86.2 (81.9 - 89.4) | 93.5 (89.6 - 96.0)    |
|                                      | 80-99    | 70.6 (58.7 - 79.6) | 100.0 (100.0 - 100.0) |
| Regional                             | All ages | 75.4 (72.9 - 77.7) | 71.8 (67.7 - 75.5)    |
|                                      | 15-49    | 84.6 (79.0 - 88.8) | 77.4 (68.1 - 84.3)    |
|                                      | 50-64    | 80.4 (76.9 - 83.4) | 76.7 (71.1 - 81.4)    |
|                                      | 65-79    | 73.6 (69.7 - 77.1) | 67.6 (61.2 - 73.2)    |
|                                      | 80-99    | 62.0 (51.7 - 70.8) | 69.9 (53.3 - 81.6)    |
| Distant                              | All ages | 16.1 (13.4 - 19.0) | 21.2 (17.4 - 25.3)    |
|                                      | 15-49    | 25.2 (16.7 - 34.6) | 35.9 (24.6 - 47.3)    |
|                                      | 50-64    | 25.2 (19.7 - 31.0) | 24.5 (18.2 - 31.3)    |
|                                      | 65-79    | 12.2 (8.7 - 16.3)  | 22.5 (16.1 - 29.7)    |
|                                      | 80-99    | 4.6 (1.5 - 10.4)   | 4.1 (0.6 - 13.7)      |
| Missing                              | All ages | 72.6 (67.0 - 77.4) | 60.8 (56.5 - 64.7)    |
|                                      | 15-49    | 86.7 (75.7 - 92.9) | 84.9 (75.4 - 91.0)    |
|                                      | 50-64    | 77.0 (68.4 - 83.6) | 74.4 (67.8 - 79.8)    |
|                                      | 65-79    | 70.5 (61.1 - 78.0) | 57.4 (50.1 - 64.0)    |
|                                      | 80-99    | 57.1 (37.9 - 72.3) | 25.0 (16.7 - 34.2)    |

Abbreviation: NS = net survival, CI = confidence interval

All ages=Age-standardised

<sup>‡</sup> Model1: Age spline with mapped SEER stage as time-dependent covariate

<sup>¶</sup> Model2: Age spline allowing separate models for each stage category
